# Supplementary material for: The complex genetics of gait speed: genome-wide meta-analysis approach
Source: publisher site journal article supplement (doi:10.18632/aging.101151), 2016-12-30
Supplement: Supplementary file 1 [file aging-v9i1-101151-supplementary-material-SD11.xls]

## Sheet: c2
CHARGE regression coefficients
FID		Unstandardized Coefficients		Standardized Coefficients	t	Sig.
		B	Std. Error	Beta
AGES	(Constant)	-0.47071	0.0796307	0	-5.91116	<0.0001
	Age	0.0204066	0.00103481	0.329298	19.7201	<0.0001
	SexF	0.0722216	0.0113976	0.105811	6.33655	<0.0001
ARIC	(Constant)	1.8733	0.1844	0	10.16	<0.0001
	Age	-0.0104	0.0025	-0.1925	-4.14	<0.0001
	SexF	-0.0411	0.022	-0.086	-1.86	0.0632
CHS	(Constant)	1.63822	0.0470244	0	34.84	<0.0001
	Age	-0.0107798	0.0006514	-0.280826	-16.55	<0.0001
	SexF	0.0648901	0.0071198	0.154655	9.11	<0.0001
FHS	(Constant)	2.568	0.044		57.626	<0.0001
	Age	-0.018	0.00058		-32.428	<0.0001
	SexF	-0.056	0.01		-5.642	<0.0001
HRS	(Constant)	1.998	0.04	0	49.52	<0.0001
	Age	-0.014	0.0005233	-0.348445	-26.77	<0.0001
	SexF	-0.07272	0.0072195	-0.131122	-10.07	<0.0001
GENOA	(Constant)	2.19985	0.119687	0	18.38	<0.0001
	Age	-0.015408	0.001676	-0.39	-9.194	<0.0001
	SexF	-0.050875	0.018653	-0.115695	-2.727	0.00662
HABC	(Constant)	2.28445	0.140564	0	16.252	<0.0001
	Age	-0.012003	0.001882	-0.152525	-6.378	<0.0001
	SexF	-0.105252	0.010716	-0.234881	-9.822	<0.0001
RS1	(Constant)	2.58678	0.127516	0	20.286	<0.0001
	Age	-0.0187881	0.0016039	-0.399196	-11.714	<0.0001
	SexF	-0.0663203	0.0145765	-0.15505	-4.54981	<0.0001
RS2	(Constant)	2.04836	0.0934658	0	21.9156	<0.0001
	Age	-0.011592	0.00128489	-0.301376	-9.02181	<0.0001
	SexF	-0.0358336	0.0121324	-0.0986642	-2.95356	0.003
RS3	(Constant)	1.6373	0.0511318	0	32.0211	<0.0001
	Age	-0.00574785	0.00084797	-0.177217	-6.77837	<0.0001
	SexF	-0.0452079	0.00867647	-0.136223	-5.2104	<0.0001
InCHIANTI	(Constant)	2.37445	0.080941	0	29.34	<0.0001
	Age	-0.018759	0.001055	-0.491279	-17.78	<0.0001
	SexF	0.134496	0.014974	0.247937	8.98	<0.0001
BLSA	(Constant)	2.32696	0.08803	0	26.43	<0.0001
	Age	-0.016588	0.00114	-0.627732	-14.56	<0.0001
	SexF	-0.03053	0.02214	-0.05948	-1.38	0.1687
LBC1921	(Constant)	7.419	2.205	0	3.364	0.0001
	Age	0	0	-0.111	-2.592	0.01
	SexF	-0.19	0.032	-0.251	-5.874	0
LBC1936	(Constant)	3.714	1.048	0	3.543	<0.0001
	Age	-6.902e-05	0	-0.051	-1.674	0.095
	SexF	-0.199	0.025	-0.242	-7.874	<0.0001
LLS	(Constant)	1.47187	0.207919	0	7.07906	1.7111e-11
	Age	-0.00495056	0.00288786	-0.113649	-1.71426	0.087816
	SexF	-0.00878137	0.0281062	-0.0207132	-0.312435	0.754991
MrOS	(Constant)	2.19204	0.0383873	0	57.1	<0.0001
	Age	-0.0133766	0.0005173	-0.357195	-25.86	<0.0001
	SexF	N/A MrOS all men
MrOSGBG	(Constant)	1.82251	0.167393	0	10.888	<0.0001
	Age	-0.006591	0.002222	-0.09594	-2.966	0.00309
	SexF	N/A MrOS all men
MrOSMalmo	(Constant)	2.27984	0.181108	0	12.59	<0.0001
	Age	-0.012856	0.002394	-0.1743	-5.37	<0.0001
	SexF	N/A MrOS all men
ROSMAP	(Constant)	1.55006	0.05281	0	29.35	<.0001
	Age	-0.01144	0.00066575	-0.38965	-17.19	<.0001
	SexM	0.02954	0.01064	0.06294	2.78	0.0056
SOF	(Constant)	2.00206	0.0479553	0	41.75	<0.0001
	Age	-0.01499	0.0006504	-0.365723	-23.05	<0.0001
	SexF	N/A SOF all women
TASCOG	(Constant)	2.077	0.116		17.9	<0.0001
	Age	-0.011	0.001		-7.72	<0.0001
	SexF	-0.073	0.021		-3.36	0.001
