# Supplementary material for: The complex genetics of gait speed: genome-wide meta-analysis approach
Source: Aging (Albany NY). 2017 Jan 10;9(1):209–46. doi: 10.18632/aging.101151 (PMC5310665; doi:10.18632/aging.101151)
Supplement: Supplementary file 2 [file aging-09-0209-s002.xlsx]

## Sheet: Sheet1
Cohorts SNPs collection
	SNPs	Analyzed
AGES	2593542	2529497
ARIC	2412126	2412126
BLSA	2543470	2502906
CHS	2612816	2255779
FHS	2606762	2494681
HABC	2543886	2506063
HRS	2470029	2456132
InCHIANTI	2543492	2493040
IBC1921	2543887	2488173
IBC1936	2543887	2395757
MrOS	3020488	2911886
ROSMAP	2543887	2462537
Rot-r1	2543887	2476552
Rot-r2	2543887	2477292
Rot-r3	2543887	2496839
SOF	3020488	2911878
TASCOG	2543150	2460636
GENOA	2543355	2491224
LLS	2548533	2430830
MrOSGBG	2458012	2438124
MrOSMalmo	2625860	2569056
