# Supplementary material for: The complex genetics of gait speed: genome-wide meta-analysis approach
Source: Aging (Albany NY). 2017 Jan 10;9(1):209–46. doi: 10.18632/aging.101151 (PMC5310665; doi:10.18632/aging.101151)
Supplement: Supplementary file 3 [file aging-09-0209-s003.xlsx]

## Sheet: 536
Candiadte SNPs list
Chromosome	Position	Gene code	Marker Name	Weight	Allele1	Allele2	Freq1	FreqSE	MinFreq	MaxFreq	Effect Sc	StdErr Sc	P-value Sc	Direction Sc	HetISq Sc	HetChiSq Sc	HetDf Sc	HetPVal Sc	Effect Val	StdErr Val	P-value Val	Direction Val	HetPVal Val	Effect Sc+Val	StdErr Sc+Val	P-value Sc+Val	Direction Sc+Val	HetPVal Sc+Val
6	33709544	UQCC2	rs17527406	28294	c	g	0.016	0.0031	0.0091	0.0249	0.0382	0.0076	5.217e-07	+++?++++++++-+++-	5.1	17.92	15	0.2669	0.0141	0.0312	0.6508	+-++	0.2669	0.0368	0.0074	6.883e-07	+++?++++++++-+++-+-++	0.4312
6	33087320	HLA-DPB1	rs9501255	28294	t	c	0.0381	0.0094	0.0209	0.0599	0.0234	0.0049	1.534e-06	+++?++++-+++-+++-	0	13.22	15	0.5853	0.0478	0.0235	0.0414	+?++	0.5853	0.0244	0.0048	3.326e-07	+++?++++-+++-+++-+?++	0.6077
6	33092650	none	rs7763822	28294	t	c	0.0382	0.0094	0.0201	0.06	0.0235	0.0049	1.541e-06	+++?++++-+++-+++-	0	13.413	15	0.5704	0.0466	0.0233	0.04524	+?++	0.5704	0.0244	0.0048	3.44e-07	+++?++++-+++-+++-+?++	0.6205
6	33086655	HLA-DPB1	rs3749985	28294	c	g	0.0381	0.0094	0.0209	0.0599	0.0234	0.0049	1.555e-06	+++?++++-+++-+++-	0	13.217	15	0.5856	0.0478	0.0235	0.04169	+?++	0.5856	0.0244	0.0048	3.385e-07	+++?++++-+++-+++-+?++	0.6082
6	27293544	none	rs7746199	30576.9	t	c	0.1659	0.0181	0.1232	0.219	0.0109	0.0023	1.585e-06	+++++++++++++++++	0	7.354	16	0.9658	0.011	0.0084	0.1935	-+++	0.9658	0.0109	0.0022	7.125e-07	+++++++++++++++++-+++	0.9588
8	102084749	NCALD	rs12155739	26203	t	c	0.0301	0.0037	0.0239	0.0386	-0.0407	0.0086	2.038e-06	-?-?---+---?-+---	10.8	16.821	13	0.2076	-0.0243	0.0323	0.4512	+?--	0.2076	-0.0396	0.0083	1.858e-06	-?-?---+---?-+---+?--	0.3057
6	27295861	none	rs3800318	31478	a	t	0.835	0.0187	0.7809	0.8767	-0.0109	0.0023	2.068e-06	-----------------	0	7.346	16	0.966	-0.0107	0.0084	0.2049	++--	0.966	-0.0109	0.0022	9.686e-07	-----------------++--	0.9539
6	27298160	none	rs13211166	31478	a	t	0.1618	0.019	0.1214	0.2157	0.0111	0.0023	2.123e-06	+++++++++++++++++	0	7.218	16	0.9688	0.0101	0.0087	0.2435	-+++	0.9688	0.011	0.0023	1.136e-06	+++++++++++++++++-+++	0.9541
6	148622037	none	rs9403969	31478	t	g	0.7373	0.0079	0.7194	0.768	0.009	0.0019	2.347e-06	-+++++++++++++++-	-7.3	16.774	16	0.4004	0.0047	0.007	0.5019	++++	0.4004	0.0087	0.0019	2.351e-06	-+++++++++++++++-++++	0.635
6	27310240	POM121L2	rs16897515	31478	a	c	0.161	0.0186	0.1232	0.2208	0.0111	0.0023	2.409e-06	+++++++++++++++++	0	7.946	16	0.9505	0.0068	0.0086	0.4255	--++	0.9505	0.0108	0.0023	2.08e-06	+++++++++++++++++--++	0.9169
17	65775215	CEP112	rs9972881	31478	a	g	0.3756	0.012	0.351	0.402	-0.0082	0.0017	2.475e-06	-+------+----+--+	-5.2	17.113	16	0.3783	0.0069	0.0063	0.2708	+--+	0.3783	-0.0071	0.0017	2.463e-05	-+------+----+--++--+	0.09431
6	148619463	none	rs6928140	30577	a	g	0.7357	0.0073	0.7197	0.769	0.009	0.0019	2.516e-06	-+++++++++++++++-	-7.1	16.813	16	0.3978	0.0047	0.007	0.4981	++++	0.3978	0.0087	0.0018	2.495e-06	-+++++++++++++++-++++	0.6283
17	65774960	CEP112	rs9972944	31478	a	g	0.3757	0.0121	0.3511	0.402	-0.0082	0.0018	2.56e-06	-+------+----+--+	-4.9	17.165	16	0.375	0.0069	0.0063	0.2731	+--+	0.375	-0.0071	0.0017	2.533e-05	-+------+----+--++--+	0.09454
17	65775145	CEP112	rs9972885	31478	t	g	0.6242	0.0121	0.598	0.6489	0.0082	0.0018	2.564e-06	+-++++++-++++-++-	-5	17.15	16	0.376	-0.0069	0.0063	0.2734	-++-	0.376	0.0071	0.0017	2.533e-05	+-++++++-++++-++--++-	0.09476
4	86422863	MAPK10	rs12508545	31478	a	t	0.9846	0.004	0.9707	0.996	0.034	0.0072	2.643e-06	+++++++++-++++++-	0	8.931	16	0.9162	0.0251	0.0273	0.3568	+++-	0.9162	0.0333	0.007	2.069e-06	+++++++++-++++++-+++-	0.9522
17	65775197	CEP112	rs9972883	31478	a	c	0.6242	0.0121	0.598	0.6489	0.0082	0.0018	2.817e-06	+-++++++-++++-++-	-5.1	17.125	16	0.3775	-0.0069	0.0063	0.2733	-++-	0.3775	0.0071	0.0017	2.749e-05	+-++++++-++++-++--++-	0.09561
6	60649355	none	rs4236162	31033	a	c	0.19	0.0197	0.1625	0.2543	-0.0104	0.0022	3.27e-06	-?------+---+-0--	20.9	21.486	15	0.122	0.0068	0.008	0.3961	-+-+	0.122	-0.0091	0.0022	2.323e-05	-?------+---+-0---+-+	0.05918
6	27315474	none	rs2893910	31478	a	t	0.8336	0.0194	0.7745	0.8756	-0.0107	0.0023	3.626e-06	-----------------	0	7.519	16	0.9619	-0.0089	0.0084	0.2913	++--	0.9619	-0.0106	0.0022	2.228e-06	-----------------++--	0.9503
12	132442095	LOC101928629	rs10870468	28640	t	c	0.4171	0.0229	0.379	0.4689	0.0089	0.0019	3.788e-06	+?++?+++-++-++0++	0	9.575	14	0.7925	0.0132	0.0082	0.1101	-?++	0.7925	0.0091	0.0019	1.322e-06	+?++?+++-++-++0++-?++	0.706
17	65788698	CEP112	rs9303489	31478	t	c	0.3254	0.0124	0.3	0.358	-0.0085	0.0018	4.184e-06	-+------+-------+	-5.2	17.102	16	0.379	0.0135	0.0067	0.04292	+-++	0.379	-0.0069	0.0018	0.0001081	-+------+-------++-++	0.04629
6	33017517	none	rs3130605	28294	t	c	0.9798	0.0038	0.9629	0.9852	-0.0293	0.0064	4.692e-06	---?----+--+-----	0	10.778	15	0.7681	-0.0491	0.0318	0.1224	-?-+	0.7681	-0.0301	0.0063	1.761e-06	---?----+--+------?-+	0.7103
5	174386344	none	rs2964037	28294	a	g	0.035	0.0071	0.0189	0.0508	0.0239	0.0052	4.808e-06	+++?+-+-++++-+++-	21.4	21.616	15	0.1183	-0.0045	0.0172	0.7943	-+-+	0.1183	0.0215	0.005	1.792e-05	+++?+-+-++++-+++--+-+	0.0714
17	65776033	CEP112	rs12939558	31478	a	g	0.3557	0.0124	0.3317	0.375	-0.0082	0.0018	4.979e-06	-+------+----+--+	-7.1	16.808	16	0.3981	0.0095	0.0064	0.1409	+-++	0.3981	-0.0069	0.0017	7.026e-05	-+------+----+--++-++	0.06037
12	132441695	LOC101928629	rs7315939	28649	a	g	0.4179	0.0228	0.379	0.469	0.0089	0.0019	4.982e-06	+?++?+++-++-++-++	0	10.189	14	0.7482	0.0136	0.0083	0.103	-?++	0.7482	0.0091	0.0019	1.689e-06	+?++?+++-++-++-++-?++	0.6662
5	161851331	GABRA1	rs6883877	29178.5	t	c	0.0291	0.0048	0.0194	0.035	-0.025	0.0055	5.122e-06	-+----+-------?--	0	14.244	15	0.5071	-0.0239	0.0175	0.1727	+---	0.5071	-0.0249	0.0053	2.211e-06	-+----+-------?--+---	0.6805
17	65777020	CEP112	rs10083855	31478	t	c	0.3406	0.017	0.3106	0.374	-0.0082	0.0018	5.229e-06	-+------+-------+	8.7	19.71	16	0.2336	0.0125	0.0064	0.0527	+-++	0.2336	-0.0067	0.0017	0.0001238	-+------+-------++-++	0.02775
17	65777153	CEP112	rs10083870	31478	t	c	0.6592	0.0168	0.626	0.6881	0.0082	0.0018	5.259e-06	+-++++++-+++++++-	8.7	19.72	16	0.2331	-0.0125	0.0064	0.05205	-+--	0.2331	0.0067	0.0017	0.000125	+-++++++-+++++++--+--	0.0275
6	60952741	none	rs4616982	31478	t	g	0.1791	0.0134	0.1559	0.2154	-0.0104	0.0023	5.284e-06	--------+---+-+--	20.3	22.571	16	0.1257	0.0022	0.0081	0.7876	-+-+	0.1257	-0.0094	0.0022	1.823e-05	--------+---+-+---+-+	0.08638
17	65777355	CEP112	rs10083872	31478	a	g	0.3409	0.0166	0.3126	0.374	-0.0082	0.0018	5.285e-06	-+------+-------+	8.9	19.751	16	0.2317	0.0125	0.0064	0.05192	+-++	0.2317	-0.0067	0.0017	0.0001257	-+------+-------++-++	0.02725
17	65777504	CEP112	rs10083877	31478	t	c	0.3408	0.0167	0.3123	0.374	-0.0082	0.0018	5.348e-06	-+------+-------+	8.9	19.753	16	0.2315	0.0125	0.0064	0.05179	+-++	0.2315	-0.0067	0.0017	0.0001271	-+------+-------++-++	0.02727
17	65785496	CEP112	rs7502798	31478	t	c	0.6666	0.013	0.635	0.6932	0.0083	0.0018	5.393e-06	+-++++++-+++++++-	4.3	18.81	16	0.2786	-0.0138	0.0066	0.03546	-+--	0.2786	0.0067	0.0018	0.000145	+-++++++-+++++++--+--	0.02586
2	56628910	none	rs17190415	31478	a	g	0.1212	0.0079	0.1003	0.1345	0.012	0.0026	5.417e-06	+++-+++-+++++++++	0	15.138	16	0.5146	0.0093	0.0096	0.3336	+-++	0.5146	0.0118	0.0025	3.515e-06	+++-+++-++++++++++-++	0.6225
17	65780577	CEP112	rs10512505	31478	t	c	0.3429	0.0139	0.3167	0.374	-0.0082	0.0018	5.538e-06	-+------+-------+	8.8	19.732	16	0.2325	0.0125	0.0064	0.05144	+-++	0.2325	-0.0067	0.0017	0.0001292	-+------+-------++-++	0.0278
6	60665121	none	rs4639340	31478	t	g	0.8284	0.0133	0.7864	0.8481	0.0102	0.0022	5.723e-06	++++++++-+++-+-++	15.3	21.262	16	0.1686	-0.0026	0.0082	0.7551	+-+-	0.1686	0.0093	0.0022	1.964e-05	++++++++-+++-+-+++-+-	0.1253
6	12805349	PHACTR1	rs6909834	31478	t	c	0.3493	0.0259	0.2869	0.412	-0.008	0.0018	5.753e-06	----------------+	0	9.487	16	0.892	-0.0119	0.0066	0.0712	-+--	0.892	-0.0083	0.0017	1.283e-06	----------------+-+--	0.9069
17	65781794	CEP112	rs7225471	31478	t	c	0.3433	0.0137	0.3167	0.374	-0.0082	0.0018	5.764e-06	-+------+-------+	8.7	19.72	16	0.2331	0.0125	0.0064	0.05137	+-++	0.2331	-0.0066	0.0017	0.0001339	-+------+-------++-++	0.02796
17	65774931	CEP112	rs9972954	31478	t	c	0.384	0.0134	0.3589	0.4112	-0.0081	0.0018	5.974e-06	--------+----+---	0	15.155	16	0.5133	0.0048	0.0062	0.4469	+--+	0.5133	-0.0071	0.0017	3.79e-05	--------+----+---+--+	0.1873
5	174385529	none	rs2909716	27392.9	t	c	0.9636	0.0066	0.9484	0.9769	-0.0235	0.0052	6.049e-06	---?-+-+----+---+	21.6	21.679	15	0.1165	0.0037	0.0174	0.8334	+-+-	0.1165	-0.0213	0.005	1.993e-05	---?-+-+----+---++-+-	0.08125
6	60669512	none	rs6459297	31478	a	g	0.1747	0.0153	0.1519	0.2136	-0.0101	0.0022	6.062e-06	--------+---+-+--	16.1	21.459	16	0.1615	0.0026	0.0082	0.752	-+-+	0.1615	-0.0092	0.0022	2.058e-05	--------+---+-+---+-+	0.1203
6	60684055	none	rs9396408	31478	t	c	0.828	0.0134	0.7863	0.8482	0.0102	0.0023	6.066e-06	++++++++-+++-+-++	16.3	21.507	16	0.1598	-0.0026	0.0082	0.7521	+-+-	0.1598	0.0093	0.0022	2.088e-05	++++++++-+++-+-+++-+-	0.1185
17	65779192	CEP112	rs10083837	31478	c	g	0.3415	0.0156	0.3167	0.374	-0.0082	0.0018	6.134e-06	-+------+-------+	8.7	19.716	16	0.2333	0.0125	0.0064	0.0518	+-++	0.2333	-0.0066	0.0017	0.0001419	-+------+-------++-++	0.02787
6	60666094	none	rs4392725	31478	a	g	0.8271	0.0134	0.7864	0.8481	0.0101	0.0022	6.136e-06	++++++++-+++-+-++	16.3	21.503	16	0.16	-0.0025	0.0082	0.756	+-+-	0.16	0.0092	0.0022	2.059e-05	++++++++-+++-+-+++-+-	0.1203
6	60686928	none	rs4629677	31478	t	c	0.1738	0.0146	0.1517	0.2137	-0.0102	0.0023	6.142e-06	--------+---+-+--	16.5	21.564	16	0.1578	0.0026	0.0082	0.7533	-+-+	0.1578	-0.0093	0.0022	2.103e-05	--------+---+-+---+-+	0.1175
6	60673846	none	rs6459298	31478	c	g	0.8251	0.0156	0.7863	0.8482	0.0101	0.0022	6.265e-06	++++++++-+++-+-++	16.5	21.568	16	0.1577	-0.0026	0.0082	0.7532	+-+-	0.1577	0.0092	0.0022	2.114e-05	++++++++-+++-+-+++-+-	0.1181
6	60679165	none	rs6459302	30576.8	t	c	0.1723	0.0134	0.1518	0.2137	-0.0102	0.0023	6.282e-06	--------+---+-+--	16.3	21.497	16	0.1602	0.0026	0.0082	0.7532	-+-+	0.1602	-0.0093	0.0022	2.147e-05	--------+---+-+---+-+	0.1193
6	60680066	none	rs4715852	31478	t	g	0.1723	0.0134	0.1518	0.2137	-0.0102	0.0023	6.286e-06	--------+---+-+--	16.3	21.512	16	0.1597	0.0025	0.0082	0.7567	-+-+	0.1597	-0.0093	0.0022	2.138e-05	--------+---+-+---+-+	0.1189
6	60677078	none	rs6459301	31478	t	g	0.1741	0.0146	0.1518	0.2137	-0.0101	0.0022	6.414e-06	--------+---+-+--	16.7	21.607	16	0.1563	0.0026	0.0082	0.7532	-+-+	0.1563	-0.0092	0.0022	2.157e-05	--------+---+-+---+-+	0.1172
6	60677521	none	rs4355613	31478	a	g	0.1739	0.0144	0.1518	0.2137	-0.0101	0.0022	6.481e-06	--------+---+-+--	16.7	21.617	16	0.156	0.0026	0.0082	0.7524	-+-+	0.156	-0.0092	0.0022	2.181e-05	--------+---+-+---+-+	0.1167
6	60612717	none	rs6459291	31478	a	c	0.1718	0.0137	0.1527	0.2135	-0.0104	0.0023	6.531e-06	--------+---+-+--	12.7	20.626	16	0.1933	0.0025	0.0082	0.7593	-+-+	0.1933	-0.0095	0.0022	2.313e-05	--------+---+-+---+-+	0.1419
6	60613324	none	rs9283922	31478	a	g	0.1716	0.0137	0.1526	0.2135	-0.0104	0.0023	6.551e-06	--------+---+-+--	13	20.697	16	0.1905	0.0025	0.0082	0.7598	-+-+	0.1905	-0.0095	0.0022	2.315e-05	--------+---+-+---+-+	0.1399
6	60628553	none	rs6920754	31478	a	t	0.1723	0.0135	0.1525	0.2135	-0.0103	0.0023	6.621e-06	--------+---+-+--	13.8	20.875	16	0.1834	0.0025	0.0082	0.7597	-+-+	0.1834	-0.0094	0.0022	2.298e-05	--------+---+-+---+-+	0.1356
6	60968550	none	rs2340641	31478	a	g	0.8298	0.0142	0.785	0.8498	0.0102	0.0023	6.8e-06	+++++-++-+++-+-++	24.3	23.79	16	0.0942	-0.0046	0.0082	0.5779	+-+-	0.0942	0.0091	0.0022	3.159e-05	+++++-++-+++-+-+++-+-	0.05879
2	56612943	none	rs2870070	31478	a	g	0.1263	0.008	0.105	0.1392	0.0116	0.0026	6.831e-06	+++-+++-+++++++++	0	15.739	16	0.4714	0.011	0.0094	0.2419	+-++	0.4714	0.0116	0.0025	3.406e-06	+++-+++-++++++++++-++	0.5838
6	60640960	none	rs4415148	31478	t	g	0.8264	0.0142	0.7864	0.8477	0.0102	0.0023	6.928e-06	++++++++-+++-+-++	14.8	21.135	16	0.1734	-0.0025	0.0082	0.76	+-+-	0.1734	0.0093	0.0022	2.348e-05	++++++++-+++-+-+++-+-	0.1296
10	71927116	none	rs11000090	28293	t	c	0.1075	0.0114	0.072	0.118	0.0138	0.0031	6.94e-06	+++?+-+-+++++++++	-3.7	16.386	15	0.3569	-0.0175	0.0098	0.0745	++--	0.3569	0.011	0.0029	0.0001765	+++?+-+-+++++++++++--	0.07304
6	60627127	none	rs4236161	31478	t	g	0.1725	0.0134	0.1525	0.2135	-0.0103	0.0023	7.048e-06	--------+---+-+--	13.9	20.899	16	0.1824	0.0025	0.0082	0.7602	-+-+	0.1824	-0.0093	0.0022	2.427e-05	--------+---+-+---+-+	0.1354
6	12804386	PHACTR1	rs1953089	31478	t	c	0.349	0.0258	0.2869	0.412	-0.0079	0.0018	7.064e-06	----------------+	0	9.451	16	0.8937	-0.0118	0.0066	0.07295	-+--	0.8937	-0.0082	0.0017	1.607e-06	----------------+-+--	0.9083
6	60965061	none	rs1953711	31478	t	c	0.83	0.0142	0.785	0.8498	0.0102	0.0023	7.115e-06	+++++-++-+++-+-++	24.5	23.84	16	0.09305	-0.0046	0.0082	0.5776	+-+-	0.09305	0.0091	0.0022	3.294e-05	+++++-++-+++-+-+++-+-	0.05797
6	60950938	none	rs3125361	31478	t	c	0.8289	0.0144	0.785	0.8498	0.0102	0.0023	7.157e-06	+++++-++-+++-+-++	24.6	23.876	16	0.09224	-0.0045	0.0082	0.5865	+-+-	0.09224	0.0091	0.0022	3.25e-05	+++++-++-+++-+-+++-+-	0.05704
6	60609245	none	rs4636030	31478	t	c	0.1719	0.0134	0.1537	0.2133	-0.0104	0.0023	7.458e-06	--------+---+-+--	10.2	20.051	16	0.2179	0.0022	0.0082	0.7875	-+-+	0.2179	-0.0095	0.0023	2.503e-05	--------+---+-+---+-+	0.1634
6	60944027	none	rs4715866	31478	c	g	0.8287	0.0144	0.785	0.8498	0.0102	0.0023	7.483e-06	+++++-++-+++-+-++	24.8	23.937	16	0.09089	-0.0044	0.0082	0.5926	+-+-	0.09089	0.0091	0.0022	3.338e-05	+++++-++-+++-+-+++-+-	0.05652
6	60376442	none	rs12210456	31478	t	g	0.1983	0.0135	0.1644	0.2445	-0.01	0.0022	7.54e-06	--------+-------+	-2.7	17.52	16	0.3527	-0.0029	0.0079	0.7084	++-+	0.3527	-0.0095	0.0022	1.135e-05	--------+-------+++-+	0.4047
6	12802582	PHACTR1	rs9463134	31478	c	g	0.3477	0.0256	0.2868	0.412	-0.0079	0.0018	7.674e-06	----------------+	0	9.46	16	0.8933	-0.0119	0.0066	0.07156	-+--	0.8933	-0.0082	0.0017	1.726e-06	----------------+-+--	0.9082
10	132625973	INPP5A	rs7091957	31476	t	c	0.5324	0.0228	0.4547	0.5604	-0.0076	0.0017	7.951e-06	----+--+----++---	14.2	20.978	16	0.1793	-0.0082	0.0061	0.1791	-+--	0.1793	-0.0076	0.0016	3.444e-06	----+--+----++----+--	0.3154
6	60375661	none	rs17658313	31478	a	c	0.1986	0.0134	0.1644	0.2445	-0.0099	0.0022	7.953e-06	--------+-------+	-2.6	17.537	16	0.3517	-0.0029	0.0079	0.7086	++-+	0.3517	-0.0094	0.0022	1.188e-05	--------+-------+++-+	0.4043
16	83439507	CDH13	rs11861812	31475	t	c	0.102	0.0165	0.0685	0.1279	-0.0128	0.0029	7.97e-06	--+----+---+---++	11.4	20.318	16	0.2062	-0.024	0.0112	0.0325	----	0.2062	-0.0135	0.0028	1.355e-06	--+----+---+---++----	0.2672
6	33106839	none	rs9469357	19307.8	t	c	0.0373	0.0105	0.0198	0.0552	0.027	0.0061	8.02e-06	+++?++++-+?+-++?-	0	12.626	13	0.4771	0.0391	0.0317	0.217	+??+	0.4771	0.0274	0.006	4.237e-06	+++?++++-+?+-++?-+??+	0.5622
3	37936222	CTDSPL	rs17037196	30080	a	g	0.0342	0.0034	0.0246	0.041	0.0233	0.0052	8.221e-06	-+-++++-++++++?+-	0	10.787	15	0.7675	-0.0228	0.0172	0.1843	---+	0.7675	0.0194	0.005	0.00011	-+-++++-++++++?+----+	0.4151
11	99436471	CNTN5	rs10501909	31478	a	t	0.2154	0.0201	0.204	0.2879	0.0094	0.0021	8.31e-06	+-++-++--++++-+++	0	13.083	16	0.6667	-0.0017	0.0078	0.8242	+++-	0.6667	0.0086	0.002	2.472e-05	+-++-++--++++-++++++-	0.7059
6	60606248	none	rs5009936	28294	t	c	0.8274	0.0135	0.7869	0.8448	0.0108	0.0024	8.345e-06	+++?++++-+++-+-++	14.1	19.783	15	0.1804	-0.0021	0.0082	0.8016	+-+-	0.1804	0.0097	0.0023	2.878e-05	+++?++++-+++-+-+++-+-	0.135
6	12801361	PHACTR1	rs6916334	31478	t	g	0.3471	0.0256	0.2867	0.412	-0.0079	0.0018	8.36e-06	----------------+	0	9.482	16	0.8922	-0.0118	0.0066	0.07301	-+--	0.8922	-0.0082	0.0017	1.904e-06	----------------+-+--	0.9069
6	60366220	none	rs12201331	31478	t	c	0.1997	0.0137	0.1644	0.2441	-0.0101	0.0023	8.416e-06	--------+-------+	-3.1	17.466	16	0.3561	-0.003	0.0079	0.6992	++-+	0.3561	-0.0095	0.0022	1.255e-05	--------+-------+++-+	0.4092
11	99436613	CNTN5	rs12280637	31478	t	g	0.2155	0.0201	0.2047	0.2884	0.0094	0.0021	8.495e-06	+-++-++--++++-+++	0	13.157	16	0.6612	-0.0016	0.0077	0.8354	+++-	0.6612	0.0086	0.002	2.478e-05	+-++-++--++++-++++++-	0.7026
6	61079906	none	rs9370718	30568.8	t	c	0.1699	0.0143	0.149	0.2151	-0.01	0.0022	8.578e-06	-----+--+---+-+--	23.6	23.558	16	0.09961	0.0043	0.0082	0.6027	-+-+	0.09961	-0.0089	0.0022	3.613e-05	-----+--+---+-+---+-+	0.07126
11	99436684	CNTN5	rs10501911	31478	t	g	0.2156	0.0201	0.2048	0.2886	0.0093	0.0021	8.645e-06	+-++-++--++++-+++	0	13.202	16	0.6579	-0.0016	0.0077	0.8405	+++-	0.6579	0.0086	0.002	2.494e-05	+-++-++--++++-++++++-	0.7007
6	61097990	none	rs4487631	31478	a	t	0.8289	0.0149	0.7849	0.8511	0.01	0.0022	8.689e-06	+++++-++-+++-+-++	23.2	23.427	16	0.1028	-0.0043	0.0083	0.6016	+-+-	0.1028	0.009	0.0022	3.661e-05	+++++-++-+++-+-+++-+-	0.07397
11	99439853	CNTN5	rs11219911	31478	t	g	0.7845	0.0204	0.7108	0.7983	-0.0092	0.0021	8.748e-06	-+--+--++----+---	0	13.528	16	0.6338	0.0012	0.0076	0.8744	---+	0.6338	-0.0085	0.002	2.423e-05	-+--+--++----+------+	0.6834
18	36325349	FHOD3	rs480906	31478	a	g	0.2486	0.0263	0.1978	0.3033	-0.0087	0.0019	8.763e-06	--------+---+---+	0	10.757	16	0.8242	-0.0043	0.0071	0.5465	+---	0.8242	-0.0083	0.0019	9.698e-06	--------+---+---++---	0.9119
11	99440701	CNTN5	rs10501913	31478	t	g	0.2155	0.0204	0.2017	0.2893	0.0092	0.0021	8.794e-06	+-++-++--++++-+++	0	13.534	16	0.6334	-0.0012	0.0076	0.8748	+++-	0.6334	0.0085	0.002	2.432e-05	+-++-++--++++-++++++-	0.6831
6	60339053	none	rs2067973	28294	a	c	0.1981	0.0137	0.1649	0.2427	-0.0115	0.0026	8.795e-06	---?----+-------+	0	14.732	15	0.4709	-0.0024	0.0083	0.7765	++-+	0.4709	-0.0107	0.0025	1.622e-05	---?----+-------+++-+	0.5068
6	148623190	none	rs9390589	31478	a	g	0.2963	0.0103	0.28	0.3218	-0.0082	0.0019	8.823e-06	+----+-+--------+	0	14.784	16	0.5405	-0.0091	0.0068	0.1829	----	0.5405	-0.0083	0.0018	3.726e-06	+----+-+--------+----	0.7641
11	99438323	CNTN5	rs10501912	31466	t	c	0.2151	0.0206	0.2018	0.2892	0.0092	0.0021	8.954e-06	+-++-++--++++-+++	0	13.442	16	0.6402	-0.0013	0.0076	0.8668	+++-	0.6402	0.0085	0.002	2.496e-05	+-++-++--++++-++++++-	0.6874
11	99436788	CNTN5	rs10893324	31474	a	c	0.2108	0.0176	0.1982	0.2772	0.0094	0.0021	9.005e-06	++++-++--++++++++	0	12.236	16	0.7276	-0.0017	0.0077	0.821	+++-	0.7276	0.0086	0.002	2.702e-05	++++-++--+++++++++++-	0.7423
6	60572974	none	rs2498205	28294	a	c	0.173	0.0131	0.1488	0.2126	-0.0108	0.0024	9.396e-06	---?----+---+-+-+	12.5	19.437	15	0.1946	0.0016	0.0083	0.8443	-+-+	0.1946	-0.0098	0.0023	3.005e-05	---?----+---+-+-+-+-+	0.1543
6	61088179	none	rs1337897	30574.4	a	g	0.8294	0.0146	0.7849	0.8511	0.0099	0.0022	9.66e-06	+++++-++-+++-+-++	23.4	23.505	16	0.1009	-0.0042	0.0082	0.6133	+-+-	0.1009	0.0089	0.0022	3.952e-05	+++++-++-+++-+-+++-+-	0.07546
17	65775972	CEP112	rs10512504	31477	t	c	0.6328	0.0124	0.611	0.6591	0.0077	0.0017	9.684e-06	+-++++++-++++-++-	-6.7	16.87	16	0.394	-0.0092	0.0063	0.1422	-+--	0.394	0.0065	0.0017	0.000118	+-++++++-++++-++--+--	0.06735
17	65775947	CEP112	rs10512503	31474	a	g	0.6328	0.0123	0.611	0.6591	0.0077	0.0017	9.758e-06	+-++++++-++++-++-	-6.6	16.883	16	0.3932	-0.0091	0.0063	0.1455	-+--	0.3932	0.0065	0.0017	0.0001175	+-++++++-++++-++--+--	0.06713
3	25409969	none	rs2364118	31478	a	g	0.7987	0.0111	0.7753	0.823	-0.0094	0.0021	9.912e-06	---------+--0---+	0	8.779	16	0.9222	-0.016	0.0078	0.0406	----	0.9222	-0.0099	0.0021	1.728e-06	---------+--0---+----	0.9043
6	33157964	none	rs9296088	28294	a	g	0.9516	0.006	0.939	0.9626	-0.0192	0.0043	1e-05	--+?-------++-+--	42.8	29.702	15	0.01304	-0.0023	0.0161	0.8865	-++-	0.01304	-0.018	0.0042	1.807e-05	--+?-------++-+---++-	0.01865
6	33972885	none	rs9461937	23394	t	c	0.7228	0.0252	0.6892	0.7819	0.0121	0.0028	1.003e-05	+++++++-+-?+-++?+	-9.3	14.639	14	0.4032	-0.0023	0.0093	0.8064	+-?-	0.4032	0.011	0.0026	3.269e-05	+++++++-+-?+-++?++-?-	0.3067
6	12801255	PHACTR1	rs6917493	31478	c	g	0.6535	0.0255	0.588	0.7133	0.0078	0.0018	1.005e-05	++++++++++++++++-	0	9.454	16	0.8935	0.0118	0.0066	0.07301	+-++	0.8935	0.0081	0.0017	2.3e-06	++++++++++++++++-+-++	0.9075
6	61087484	none	rs4960510	31478	t	c	0.1703	0.0146	0.1489	0.2151	-0.0099	0.0022	1.006e-05	-----+--+---+-+--	23.6	23.559	16	0.09958	0.0043	0.0082	0.6036	-+-+	0.09958	-0.0089	0.0022	4.167e-05	-----+--+---+-+---+-+	0.07201
4	86436634	MAPK10	rs12508579	31478	t	c	0.9852	0.004	0.9707	0.995	0.0321	0.0073	1.019e-05	+++++++++-++++++-	0	7.73	16	0.9565	0.0113	0.027	0.6755	+++-	0.9565	0.0306	0.007	1.417e-05	+++++++++-++++++-+++-	0.9827
2	56621615	none	rs2112020	31478	t	g	0.8691	0.0084	0.857	0.8949	-0.0114	0.0026	1.023e-05	---+---+---------	0	14.905	16	0.5316	-0.0127	0.0093	0.1735	-+--	0.5316	-0.0115	0.0025	4.006e-06	---+---+----------+--	0.7148
6	61093092	none	rs1933175	31478	t	c	0.1717	0.0148	0.1489	0.2151	-0.0099	0.0022	1.027e-05	-----+--+---+-+--	23.2	23.448	16	0.1023	0.0035	0.0083	0.6728	-+-+	0.1023	-0.009	0.0022	3.799e-05	-----+--+---+-+---+-+	0.07451
6	60714265	none	rs6940900	31478	t	c	0.8284	0.0139	0.7854	0.8493	0.0099	0.0022	1.045e-05	+++++-++-+++-+-++	24.8	23.951	16	0.09058	-0.0026	0.0082	0.75	+-+-	0.09058	0.009	0.0022	3.448e-05	+++++-++-+++-+-+++-+-	0.07317
18	59515413	CCBE1	rs1557406	31478	c	g	0.3563	0.0177	0.279	0.3876	-0.0087	0.002	1.046e-05	-------+-----+-+-	20	22.491	16	0.128	-0.0035	0.0066	0.5898	----	0.128	-0.0082	0.0019	1.382e-05	-------+-----+-+-----	0.2802
2	56612003	none	rs6545583	31478	t	g	0.8737	0.0075	0.8607	0.895	-0.0113	0.0026	1.049e-05	---+---+---------	0	15.334	16	0.5004	-0.0114	0.0094	0.2217	-+--	0.5004	-0.0113	0.0025	4.897e-06	---+---+----------+--	0.6874
10	132642604	INPP5A	rs4880419	31477	t	c	0.4335	0.0084	0.4109	0.4478	0.0075	0.0017	1.062e-05	++++-++-++++--+++	32.3	26.582	16	0.04637	0.0049	0.0062	0.43	+-++	0.04637	0.0074	0.0017	9.049e-06	++++-++-++++--++++-++	0.08684
3	25412064	none	rs7615918	31478	t	c	0.799	0.0112	0.7753	0.822	-0.0094	0.0021	1.072e-05	---------+--0---+	0	8.9	16	0.9175	-0.0163	0.0078	0.03647	----	0.9175	-0.0099	0.0021	1.763e-06	---------+--0---+----	0.9034
6	60571702	none	rs2498201	28294	a	g	0.173	0.0132	0.1488	0.2126	-0.0107	0.0024	1.075e-05	---?----+---+-+-+	12.1	19.336	15	0.1989	0.0016	0.0083	0.844	-+-+	0.1989	-0.0097	0.0023	3.41e-05	---?----+---+-+-+-+-+	0.1583
6	12800591	PHACTR1	rs12523719	31478	t	g	0.6535	0.0255	0.588	0.7133	0.0078	0.0018	1.077e-05	++++++++++++++++-	0	9.485	16	0.8921	0.0118	0.0066	0.07331	+-++	0.8921	0.0081	0.0017	2.476e-06	++++++++++++++++-+-++	0.9059
11	99451024	CNTN5	rs10893353	31478	c	g	0.2137	0.0199	0.2038	0.2878	0.0092	0.0021	1.092e-05	+-++-++--++++-++-	0	13.913	16	0.6052	-0.0009	0.0077	0.9021	+++-	0.6052	0.0084	0.002	2.82e-05	+-++-++--++++-++-+++-	0.6688
6	60570655	none	rs2498197	28294	a	t	0.827	0.0132	0.7874	0.8512	0.0107	0.0024	1.102e-05	+++?++++-+++-+-+-	11.8	19.285	15	0.2011	-0.0016	0.0083	0.844	+-+-	0.2011	0.0097	0.0023	3.489e-05	+++?++++-+++-+-+-+-+-	0.1602
6	60703280	none	rs4426992	30576.8	t	g	0.172	0.0141	0.1507	0.2146	-0.0099	0.0022	1.107e-05	-----+--+---+-+--	24.2	23.733	16	0.0955	0.0026	0.0082	0.7517	-+-+	0.0955	-0.009	0.0022	3.604e-05	-----+--+---+-+---+-+	0.07756
6	60705649	none	rs7765475	31478	a	g	0.828	0.0141	0.7854	0.8493	0.0099	0.0022	1.11e-05	+++++-++-+++-+-++	24.2	23.733	16	0.09551	-0.0026	0.0082	0.7517	+-+-	0.09551	0.009	0.0022	3.613e-05	+++++-++-+++-+-+++-+-	0.07757
6	60701253	none	rs6937023	31478	t	c	0.8279	0.0141	0.7854	0.8493	0.0098	0.0022	1.111e-05	+++++-++-+++-+-++	24.1	23.715	16	0.09592	-0.0026	0.0082	0.75	+-+-	0.09592	0.009	0.0022	3.625e-05	+++++-++-+++-+-+++-+-	0.0776
6	60564556	none	rs12206108	28294	a	t	0.173	0.0132	0.1488	0.2126	-0.0107	0.0024	1.118e-05	---?----+---+-+-+	11.8	19.271	15	0.2017	0.0016	0.0083	0.8442	-+-+	0.2017	-0.0097	0.0023	3.533e-05	---?----+---+-+-+-+-+	0.1609
6	60524261	none	rs12199370	28294	t	g	0.1731	0.0131	0.1488	0.2124	-0.0107	0.0024	1.121e-05	---?----+---+-+-+	11.5	19.204	15	0.2046	0.0016	0.0083	0.8444	-+-+	0.2046	-0.0097	0.0023	3.547e-05	---?----+---+-+-+-+-+	0.166
15	91687632	none	rs7403412	31478	t	c	0.725	0.0136	0.6918	0.753	-0.0096	0.0022	1.123e-05	-------------0--+	0	9.962	16	0.8686	-0.009	0.0081	0.2651	----	0.8686	-0.0095	0.0021	6.458e-06	-------------0--+----	0.9602
6	100414174	SIM1	rs17060534	31478	a	g	0.0747	0.0081	0.0519	0.0834	-0.0142	0.0032	1.13e-05	-----+--+----+---	-7.3	16.77	16	0.4006	-0.0115	0.0117	0.3275	---+	0.4006	-0.014	0.0031	8.182e-06	-----+--+----+------+	0.4433
1	98449078	none	rs957984	31478	t	c	0.7399	0.0184	0.7243	0.786	-0.0085	0.0019	1.134e-05	-++-+---+--+----+	0	9.983	16	0.8675	-0.0085	0.0071	0.2326	---+	0.8675	-0.0085	0.0019	5.789e-06	-++-+---+--+----+---+	0.9221
6	60990914	none	rs1856253	31478	c	g	0.8294	0.0142	0.785	0.8498	0.0099	0.0023	1.143e-05	+++++-++-+++-+-++	26.1	24.368	16	0.08178	-0.0046	0.0082	0.5762	+-+-	0.08178	0.0089	0.0022	4.984e-05	+++++-++-+++-+-+++-+-	0.05306
6	60700012	none	rs13209368	31478	a	t	0.1722	0.0142	0.1507	0.2145	-0.0098	0.0022	1.15e-05	-----+--+---+-+--	24.2	23.744	16	0.09524	0.0026	0.0082	0.7499	-+-+	0.09524	-0.0089	0.0022	3.736e-05	-----+--+---+-+---+-+	0.0772
6	60531634	none	rs12202781	28294	a	g	0.1731	0.0131	0.1488	0.2125	-0.0107	0.0024	1.152e-05	---?----+---+-+-+	11.7	19.247	15	0.2028	0.0016	0.0083	0.8446	-+-+	0.2028	-0.0097	0.0023	3.63e-05	---?----+---+-+-+-+-+	0.164
15	91708327	none	rs12904129	31478	t	c	0.3796	0.0114	0.36	0.4	0.0076	0.0017	1.153e-05	+++++++++++++-++-	0	13.221	16	0.6565	0.0138	0.0064	0.03096	++++	0.6565	0.008	0.0017	1.797e-06	+++++++++++++-++-++++	0.8239
11	99453496	CNTN5	rs2656181	31478	t	c	0.7816	0.0185	0.7119	0.7921	-0.009	0.0021	1.157e-05	-+--+--++----+---	0	13.829	16	0.6115	0.0009	0.0076	0.9042	---+	0.6115	-0.0083	0.002	2.959e-05	-+--+--++----+------+	0.6693
6	60523799	none	rs1590354	28294	t	g	0.8267	0.0131	0.7876	0.8512	0.0107	0.0024	1.168e-05	+++?++++-+++-+-+-	11.5	19.217	15	0.2041	-0.0016	0.0083	0.8433	+-+-	0.2041	0.0097	0.0023	3.686e-05	+++?++++-+++-+-+-+-+-	0.1658
10	84739983	none	rs12778325	31478	t	c	0.3018	0.0197	0.2406	0.324	0.0084	0.0019	1.189e-05	-++++++-++++++++-	12.7	20.62	16	0.1936	-0.0029	0.0072	0.682	---+	0.1936	0.0077	0.0019	3.648e-05	-++++++-++++++++----+	0.1205
6	60992549	none	rs4960492	31478	a	t	0.1696	0.0142	0.1502	0.215	-0.0099	0.0023	1.193e-05	-----+--+---+-+--	26.2	24.39	16	0.08133	0.0046	0.0082	0.5748	-+-+	0.08133	-0.0088	0.0022	5.192e-05	-----+--+---+-+---+-+	0.05267
6	60522649	none	rs12195704	28294	t	c	0.1734	0.013	0.1488	0.2123	-0.0107	0.0024	1.207e-05	---?----+---+-+-+	11.4	19.196	15	0.205	0.0019	0.0083	0.8209	-+-+	0.205	-0.0097	0.0024	3.928e-05	---?----+---+-+-+-+-+	0.1675
6	61057255	none	rs6459322	31478	a	g	0.8291	0.0142	0.785	0.8502	0.0098	0.0022	1.226e-05	+++++-++-+++-+-++	25.6	24.193	16	0.08537	-0.0042	0.0082	0.6068	+-+-	0.08537	0.0088	0.0022	4.913e-05	+++++-++-+++-+-+++-+-	0.06114
1	98448286	none	rs7530588	31478	a	g	0.2609	0.0191	0.2139	0.2756	0.0085	0.0019	1.234e-05	+--+-+++-++-++++-	0	10.13	16	0.8598	0.0082	0.0071	0.2471	+++-	0.8598	0.0085	0.0019	6.58e-06	+--+-+++-++-++++-+++-	0.9112
2	56688357	none	rs918332	31478	a	g	0.8738	0.0087	0.8568	0.895	-0.0114	0.0026	1.234e-05	---+---+---------	0	15.184	16	0.5112	-0.0115	0.0094	0.2224	-+--	0.5112	-0.0115	0.0025	5.766e-06	---+---+----------+--	0.6911
6	61066175	none	rs9358022	31478	a	g	0.1706	0.0143	0.1495	0.215	-0.0098	0.0022	1.257e-05	-----+--+---+-+--	25.1	24.047	16	0.08849	0.0043	0.0082	0.6017	-+-+	0.08849	-0.0088	0.0022	5.081e-05	-----+--+---+-+---+-+	0.06353
6	61043532	none	rs1337895	31478	t	c	0.8289	0.0142	0.785	0.8498	0.0097	0.0022	1.281e-05	+++++-++-+++-+-++	26.1	24.352	16	0.08209	-0.0044	0.0082	0.5942	+-+-	0.08209	0.0088	0.0022	5.225e-05	+++++-++-+++-+-+++-+-	0.05697
6	61054808	none	rs3904828	31478	t	c	0.1708	0.0142	0.1499	0.215	-0.0098	0.0022	1.282e-05	-----+--+---+-+--	25.8	24.27	16	0.08377	0.0043	0.0082	0.6028	-+-+	0.08377	-0.0088	0.0022	5.15e-05	-----+--+---+-+---+-+	0.05958
6	12796822	PHACTR1	rs4714870	30577	t	g	0.6517	0.026	0.588	0.7136	0.0077	0.0018	1.307e-05	++++++++++++++++-	0	9.589	16	0.8872	0.0117	0.0066	0.07436	+-++	0.8872	0.008	0.0017	3.052e-06	++++++++++++++++-+-++	0.9001
18	36328268	FHOD3	rs677347	31478	t	g	0.2487	0.0261	0.2001	0.3044	-0.0084	0.0019	1.309e-05	--------+---+---+	0	10.526	16	0.8378	-0.0055	0.0071	0.4373	+---	0.8378	-0.0082	0.0019	1.174e-05	--------+---+---++---	0.9258
3	73493448	PDZRN3	rs4277628	31478	t	c	0.4664	0.0224	0.411	0.5374	-0.0075	0.0017	1.323e-05	-++-----++--+----	43.9	32.1	16	0.009704	-0.0005	0.0062	0.9397	++-+	0.009704	-0.007	0.0017	2.71e-05	-++-----++--+----++-+	0.02028
6	61063276	none	rs3851534	30575.6	t	c	0.8292	0.0142	0.785	0.8504	0.0097	0.0022	1.352e-05	+++++-++-+++-+-++	25.4	24.117	16	0.08697	-0.0043	0.0082	0.6041	+-+-	0.08697	0.0087	0.0022	5.382e-05	+++++-++-+++-+-+++-+-	0.06261
6	57405226	PRIM2	rs12205722	28294	t	c	0.1975	0.0145	0.165	0.2433	-0.0116	0.0027	1.372e-05	---?----+-------+	0	14.072	15	0.5201	-0.0025	0.0086	0.7715	++-+	0.5201	-0.0108	0.0025	2.406e-05	---?----+-------+++-+	0.5549
1	98449850	none	rs12084220	31478	a	g	0.2601	0.0184	0.2141	0.2757	0.0084	0.0019	1.378e-05	+--+-+++-++-++++-	0	9.94	16	0.8698	0.0086	0.0071	0.2229	+++-	0.8698	0.0085	0.0019	6.81e-06	+--+-+++-++-++++-+++-	0.9261
1	98450691	none	rs11166016	31478	t	c	0.7399	0.0183	0.7243	0.7859	-0.0084	0.0019	1.42e-05	-++-+---+--+----+	0	9.928	16	0.8703	-0.0088	0.0071	0.2149	---+	0.8703	-0.0084	0.0019	6.836e-06	-++-+---+--+----+---+	0.9283
1	98452094	none	rs7514150	31478	t	g	0.7401	0.0182	0.7243	0.7854	-0.0084	0.0019	1.425e-05	-++-+---+--+----+	0	9.865	16	0.8736	-0.0088	0.0071	0.2139	---+	0.8736	-0.0084	0.0019	6.838e-06	-++-+---+--+----+---+	0.93
6	100420132	SIM1	rs3778035	30577	t	c	0.9238	0.0088	0.9132	0.9483	0.0142	0.0033	1.427e-05	+++++-++-++++-+-+	-11.1	16.204	16	0.4388	0.0115	0.012	0.3383	+++-	0.4388	0.0139	0.0032	1.047e-05	+++++-++-++++-+-++++-	0.4626
6	60435357	none	rs12204746	28294	a	g	0.8252	0.0123	0.7901	0.8512	0.0109	0.0025	1.428e-05	+++?++++-+++-+-+-	1.9	17.334	15	0.2993	-0.0008	0.0083	0.9196	+-+-	0.2993	0.0099	0.0024	4.065e-05	+++?++++-+++-+-+-+-+-	0.2843
1	98452877	none	rs1434370	31476	t	g	0.7403	0.0182	0.7243	0.7853	-0.0084	0.0019	1.44e-05	-++-+---+--+----+	0	9.857	16	0.874	-0.0088	0.0071	0.2137	---+	0.874	-0.0085	0.0019	6.903e-06	-++-+---+--+----+---+	0.9301
1	98452886	none	rs1434371	31478	a	c	0.7407	0.0185	0.7243	0.7853	-0.0085	0.002	1.449e-05	-++-+---+--+----+	0	9.908	16	0.8714	-0.0088	0.0071	0.2135	---+	0.8714	-0.0085	0.0019	6.946e-06	-++-+---+--+----+---+	0.9286
6	100411059	SIM1	rs3798504	31478	a	t	0.9256	0.008	0.9167	0.9481	0.014	0.0032	1.453e-05	+++++-++-++++-+-+	-7.7	16.717	16	0.4041	0.0116	0.0117	0.3226	+++-	0.4041	0.0138	0.0031	1.034e-05	+++++-++-++++-+-++++-	0.4421
6	57512263	PRIM2	rs12208485	28294	a	g	0.175	0.0122	0.1488	0.2095	-0.0109	0.0025	1.475e-05	---?----+---+-+-+	-0.9	16.854	15	0.3276	0.0007	0.0083	0.9356	-+-+	0.3276	-0.0099	0.0024	4.079e-05	---?----+---+-+-+-+-+	0.3176
18	36327664	FHOD3	rs507163	31478	t	c	0.7453	0.0264	0.6958	0.8018	0.0084	0.0019	1.475e-05	++++++++-+++-+++-	0	10.59	16	0.8341	0.006	0.0071	0.3938	-+++	0.8341	0.0082	0.0019	1.2e-05	++++++++-+++-+++--+++	0.9298
6	12790974	PHACTR1	rs1412753	31478	c	g	0.3488	0.0264	0.2864	0.412	-0.0076	0.0018	1.481e-05	----------------+	0	9.661	16	0.8837	-0.0118	0.0066	0.07328	-+--	0.8837	-0.0079	0.0017	3.433e-06	----------------+-+--	0.8981
1	98455178	none	rs10875156	31478	t	c	0.7407	0.0187	0.7243	0.785	-0.0085	0.002	1.492e-05	-++-+---+--+----+	0	10.165	16	0.8579	-0.0086	0.0072	0.2321	---+	0.8579	-0.0085	0.0019	7.597e-06	-++-+---+--+----+---+	0.9209
1	98455064	none	rs11166017	31478	a	t	0.2594	0.0186	0.215	0.2757	0.0085	0.002	1.496e-05	+--+-+++-++-++++-	0	10.122	16	0.8602	0.0085	0.0072	0.2325	+++-	0.8602	0.0085	0.0019	7.626e-06	+--+-+++-++-++++-+++-	0.9224
6	57405243	PRIM2	rs12205821	28294	t	g	0.1977	0.0144	0.165	0.2433	-0.0115	0.0027	1.5e-05	---?----+-------+	0	14.163	15	0.5132	-0.0025	0.0086	0.7716	++-+	0.5132	-0.0107	0.0025	2.614e-05	---?----+-------+++-+	0.5495
6	12790120	PHACTR1	rs2327619	31478	a	g	0.3488	0.0263	0.2865	0.412	-0.0076	0.0018	1.505e-05	----------------+	0	9.666	16	0.8835	-0.0118	0.0066	0.07328	-+--	0.8835	-0.0079	0.0017	3.492e-06	----------------+-+--	0.8979
6	60518512	none	rs6937559	28294	a	g	0.1736	0.0129	0.1488	0.2119	-0.0106	0.0025	1.508e-05	---?----+---+-+-+	11.1	19.133	15	0.2078	0.0019	0.0083	0.82	-+-+	0.2078	-0.0096	0.0024	4.824e-05	---?----+---+-+-+-+-+	0.1717
4	86454812	none	rs12512524	31478	c	g	0.9852	0.004	0.9707	0.995	0.0313	0.0072	1.513e-05	+++++++++-++++++-	0	7.583	16	0.9603	0.0091	0.0265	0.7314	+++-	0.9603	0.0297	0.007	2.277e-05	+++++++++-++++++-+++-	0.9867
6	60517555	none	rs12193305	28294	t	c	0.8263	0.0129	0.7881	0.8512	0.0106	0.0025	1.521e-05	+++?++++-+++-+-+-	11.2	19.138	15	0.2075	-0.0019	0.0083	0.8202	+-+-	0.2075	0.0096	0.0024	4.861e-05	+++?++++-+++-+-+-+-+-	0.1716
6	57520263	PRIM2	rs12213707	28294	a	g	0.1752	0.0121	0.1488	0.2096	-0.0109	0.0025	1.521e-05	---?----+---+-+-+	-0.2	16.962	15	0.3211	0.0007	0.0083	0.9321	-+-+	0.3211	-0.0099	0.0024	4.215e-05	---?----+---+-+-+-+-+	0.3104
6	12773757	PHACTR1	rs950720	31478	t	c	0.3487	0.0271	0.2865	0.41	-0.0078	0.0018	1.521e-05	----------------+	0	9.516	16	0.8907	-0.0118	0.0066	0.07373	-+--	0.8907	-0.0081	0.0017	3.507e-06	----------------+-+--	0.9032
1	98456184	none	rs10875157	31478	t	c	0.2544	0.0193	0.212	0.2725	0.0087	0.002	1.552e-05	+--+-+++-++-++++-	0	10.747	16	0.8248	0.0079	0.0072	0.2717	+++-	0.8248	0.0086	0.0019	8.91e-06	+--+-+++-++-++++-+++-	0.8974
6	12765092	PHACTR1	rs6922482	31478	a	g	0.3435	0.026	0.2865	0.408	-0.0079	0.0018	1.565e-05	------0---------+	0	9.287	16	0.9011	-0.012	0.0067	0.07338	-+--	0.9011	-0.0082	0.0018	3.566e-06	------0---------+-+--	0.9121
6	12782735	PHACTR1	rs7760140	31478	t	g	0.3486	0.0263	0.2865	0.412	-0.0076	0.0018	1.567e-05	----------------+	0	9.836	16	0.8751	-0.0119	0.0066	0.07251	-+--	0.8751	-0.0079	0.0017	3.617e-06	----------------+-+--	0.8915
18	36328317	FHOD3	rs500871	31478	t	c	0.2486	0.0261	0.2002	0.3044	-0.0084	0.0019	1.572e-05	--------+---+---+	0	10.917	16	0.8146	-0.0054	0.0071	0.4497	+---	0.8146	-0.0081	0.0019	1.44e-05	--------+---+---++---	0.9156
6	57512984	PRIM2	rs12190422	28294	t	c	0.8247	0.0121	0.7905	0.8512	0.0109	0.0025	1.574e-05	+++?++++-+++-+-+-	-0.7	16.889	15	0.3255	-0.0007	0.0083	0.9354	+-+-	0.3255	0.0099	0.0024	4.326e-05	+++?++++-+++-+-+-+-+-	0.3163
6	57489994	PRIM2	rs6908145	31478	t	c	0.8124	0.014	0.7667	0.8369	0.0104	0.0024	1.578e-05	++++++++-+++++++-	5.7	19.08	16	0.2645	0.0065	0.0081	0.4201	--+-	0.2645	0.01	0.0023	1.36e-05	++++++++-+++++++---+-	0.2747
6	33093415	none	rs9461833	20210	a	g	0.0388	0.0114	0.0201	0.06	0.0258	0.006	1.579e-05	+++?++++-+?+-++?-	-13	13.274	13	0.4269	0.0483	0.0312	0.1225	+??+	0.4269	0.0266	0.0059	6.367e-06	+++?++++-+?+-++?-+??+	0.4635
6	12786278	PHACTR1	rs10948247	31478	a	c	0.3488	0.0263	0.2865	0.412	-0.0076	0.0018	1.586e-05	----------------+	0	9.771	16	0.8783	-0.0118	0.0066	0.07328	-+--	0.8783	-0.0079	0.0017	3.682e-06	----------------+-+--	0.8936
6	25872350	SLC17A3	rs972087	31478	a	g	0.9033	0.0121	0.8811	0.9333	-0.0128	0.003	1.605e-05	-------+------+-+	0	12.405	16	0.7157	-0.0043	0.0102	0.6748	++-+	0.7157	-0.0121	0.0029	2.16e-05	-------+------+-+++-+	0.4761
18	36331905	FHOD3	rs2670669	31478	a	g	0.2491	0.0257	0.2049	0.3044	-0.0084	0.0019	1.606e-05	--------+---+---+	0	11.322	16	0.7892	-0.0051	0.0071	0.4708	----	0.7892	-0.0081	0.0019	1.536e-05	--------+---+---+----	0.9013
6	12787481	PHACTR1	rs883947	31478	t	c	0.3485	0.0262	0.2865	0.412	-0.0076	0.0018	1.606e-05	----------------+	0	9.783	16	0.8777	-0.0118	0.0066	0.07299	-+--	0.8777	-0.0079	0.0017	3.724e-06	----------------+-+--	0.8933
22	44754778	ARHGAP8	rs5765956	27003	t	c	0.5505	0.0154	0.515	0.593	0.0083	0.0019	1.628e-05	+?++?++--++?+++++	0	8.002	13	0.8435	-0.0135	0.0081	0.09377	-?-+	0.8435	0.0072	0.0019	0.0001499	+?++?++--++?+++++-?-+	0.1311
6	57385558	PRIM2	rs12201359	28294	a	t	0.8025	0.0146	0.7565	0.835	0.0115	0.0027	1.632e-05	+++?++++-+++++++-	0	13.882	15	0.5345	0.0025	0.0086	0.7713	--+-	0.5345	0.0107	0.0026	2.826e-05	+++?++++-+++++++---+-	0.5673
16	24306980	CACNG3	rs9926669	31478	a	t	0.2491	0.0113	0.236	0.291	-0.0087	0.002	1.632e-05	----------------+	0	13.479	16	0.6374	-0.0019	0.0074	0.7966	+--+	0.6374	-0.0083	0.002	2.616e-05	----------------++--+	0.3524
6	12784060	PHACTR1	rs9296464	31478	t	c	0.6513	0.0263	0.588	0.7135	0.0076	0.0018	1.644e-05	++++++++++++++++-	0	9.837	16	0.875	0.0118	0.0066	0.07325	+-++	0.875	0.0079	0.0017	3.817e-06	++++++++++++++++-+-++	0.8909
6	12770590	PHACTR1	rs10948235	31478	t	c	0.6533	0.0258	0.591	0.7135	0.0078	0.0018	1.698e-05	++++++++++++++++-	0	9.433	16	0.8945	0.0118	0.0066	0.07576	+-++	0.8945	0.0081	0.0017	3.963e-06	++++++++++++++++-+-++	0.9054
18	59514511	CCBE1	rs4558500	31465	t	c	0.6623	0.0188	0.6354	0.745	0.0085	0.002	1.706e-05	+++++++-+++++++--	20.8	22.723	16	0.1214	0.0042	0.0065	0.5164	++-+	0.1214	0.0081	0.0019	1.919e-05	+++++++-+++++++--++-+	0.2581
18	36333534	FHOD3	rs2625065	31478	a	g	0.7494	0.0254	0.6956	0.7951	0.0083	0.0019	1.721e-05	++++++++-+++-+++-	0	11.398	16	0.7843	0.005	0.0071	0.4864	++++	0.7843	0.0081	0.0019	1.692e-05	++++++++-+++-+++-++++	0.8977
6	12762581	PHACTR1	rs13217579	31478	t	g	0.6591	0.026	0.593	0.7136	0.0081	0.0019	1.731e-05	++++++-+++++++++-	0	9.286	16	0.9012	0.0128	0.0069	0.06342	+-++	0.9012	0.0084	0.0018	3.649e-06	++++++-+++++++++-+-++	0.9172
6	33093062	none	rs7764491	20210	c	g	0.961	0.0114	0.94	0.9799	-0.0256	0.006	1.746e-05	---?----+-?-+--?+	0	12.952	13	0.4515	-0.0501	0.0311	0.1068	-??-	0.4515	-0.0265	0.0059	6.631e-06	---?----+-?-+--?+-??-	0.4688
1	98456881	none	rs4000204	31478	a	g	0.2591	0.019	0.2158	0.2758	0.0087	0.002	1.748e-05	+--+-+++-++-++++-	0	10.415	16	0.8441	0.0091	0.0074	0.2174	+++-	0.8441	0.0087	0.002	8.479e-06	+--+-+++-++-++++-+++-	0.9081
20	3849826	MAVS	rs6084497	29094	t	c	0.7249	0.0146	0.697	0.77	0.0089	0.0021	1.748e-05	-+++?++++++-+++++	34.8	26.076	15	0.03723	0.0023	0.0069	0.7373	-+-+	0.03723	0.0083	0.002	2.703e-05	-+++?++++++-+++++-+-+	0.06267
6	12788543	PHACTR1	rs1412752	31478	a	t	0.6567	0.0247	0.597	0.7165	0.0076	0.0018	1.77e-05	++++++++++++++++-	0	10.015	16	0.8659	0.0118	0.0066	0.07507	+-++	0.8659	0.0079	0.0017	4.166e-06	++++++++++++++++-+-++	0.8958
1	98457129	none	rs4000199	31478	t	c	0.2584	0.0189	0.2158	0.2759	0.0087	0.002	1.773e-05	+--+-+++-++-++++-	0	10.629	16	0.8318	0.0092	0.0074	0.2148	+++-	0.8318	0.0087	0.002	8.514e-06	+--+-+++-++-++++-+++-	0.8996
18	36338601	FHOD3	rs2670671	31478	a	c	0.2493	0.0256	0.2046	0.3043	-0.0083	0.0019	1.783e-05	--------+---+---+	0	11.344	16	0.7877	-0.005	0.0071	0.4805	----	0.7877	-0.0081	0.0019	1.73e-05	--------+---+---+----	0.9017
18	36341098	FHOD3	rs2848589	31478	a	g	0.2493	0.0256	0.2044	0.3043	-0.0083	0.0019	1.792e-05	--------+---+---+	0	11.326	16	0.7889	-0.0049	0.0071	0.4884	----	0.7889	-0.008	0.0019	1.765e-05	--------+---+---+----	0.9026
6	100404876	SIM1	rs3798511	31478	t	c	0.9258	0.0093	0.9177	0.9541	0.014	0.0033	1.836e-05	+++++-++-++++-+-+	1.2	18.22	16	0.3112	0.0125	0.0118	0.2898	+++-	0.3112	0.0138	0.0032	1.199e-05	+++++-++-++++-+-++++-	0.3367
6	100414550	SIM1	rs3798500	31478	t	c	0.9202	0.01	0.9078	0.946	0.0139	0.0032	1.837e-05	+++++-++-++++-+-+	-9.4	16.46	16	0.4213	0.0121	0.0117	0.3011	+++-	0.4213	0.0137	0.0031	1.226e-05	+++++-++-++++-+-++++-	0.4827
10	93985835	none	rs1223581	31478	t	c	0.4973	0.0118	0.4698	0.515	0.0073	0.0017	1.84e-05	++-+++++-++++-+++	0	10.738	16	0.8253	0.0066	0.0062	0.2849	--++	0.8253	0.0073	0.0017	1.138e-05	++-+++++-++++-+++--++	0.7619
6	33089573	HLA-DPB1	rs9501263	20210	a	g	0.039	0.0114	0.0201	0.06	0.0255	0.006	1.877e-05	+++?++++-+?+-++?-	0	12.875	13	0.4575	0.051	0.0312	0.102	+??+	0.4575	0.0264	0.0059	7.017e-06	+++?++++-+?+-++?-+??+	0.4638
6	148608522	none	rs9689369	31478	a	g	0.7586	0.0158	0.7302	0.779	0.0088	0.0021	1.893e-05	-+++++++++++++++-	-0.2	17.968	16	0.3258	0.0053	0.0075	0.4823	++++	0.3258	0.0086	0.002	1.673e-05	-+++++++++++++++-++++	0.5602
12	100407284	SLC17A8	rs10860589	28294	t	c	0.96	0.0083	0.9431	0.97	-0.0215	0.005	1.906e-05	---?-------+-----	0	11.64	15	0.706	-0.0003	0.0159	0.9832	+++-	0.706	-0.0196	0.0048	4.605e-05	---?-------+-----+++-	0.5794
18	36344917	FHOD3	rs1996141	31478	t	c	0.2491	0.026	0.2	0.3043	-0.0083	0.0019	1.913e-05	--------+---+---+	0	11.391	16	0.7847	-0.0049	0.0071	0.4902	----	0.7847	-0.008	0.0019	1.884e-05	--------+---+---+----	0.9012
6	100404302	SIM1	rs3798513	31478	a	c	0.926	0.0093	0.9177	0.9541	0.0139	0.0033	1.932e-05	+++++-++-++++-+-+	0.7	18.128	16	0.3165	0.0125	0.0118	0.2883	+++-	0.3165	0.0138	0.0032	1.255e-05	+++++-++-++++-+-++++-	0.3398
3	25302123	none	rs322668	31477	a	g	0.6899	0.0122	0.6695	0.727	-0.0078	0.0018	1.962e-05	---+-----+--0+--+	2.7	18.506	16	0.2951	0.0014	0.0066	0.8337	-++-	0.2951	-0.0071	0.0018	5.3e-05	---+-----+--0+--+-++-	0.391
10	84763923	none	rs2484083	31478	a	g	0.3015	0.0216	0.2294	0.3249	0.0078	0.0018	1.974e-05	-++++++-++++++++-	20.8	22.733	16	0.1211	-0.0043	0.007	0.5329	---+	0.1211	0.0071	0.0018	7.177e-05	-++++++-++++++++----+	0.06081
11	13602541	none	rs7948130	23389	a	g	0.1441	0.0085	0.1194	0.162	-0.0127	0.003	1.977e-05	-+------+-?----?-	0	7.148	14	0.9289	-0.0002	0.011	0.9846	+-?-	0.9289	-0.0118	0.0029	4.035e-05	-+------+-?----?-+-?-	0.7028
10	84790664	none	rs1931875	31478	a	g	0.7047	0.0192	0.682	0.775	-0.0078	0.0018	1.979e-05	+------+--------+	15.1	21.206	16	0.1707	0.0058	0.007	0.4075	+++-	0.1707	-0.007	0.0018	9.059e-05	+------+--------++++-	0.06477
10	84790467	none	rs2991915	31475	a	g	0.2958	0.0194	0.225	0.319	0.0078	0.0018	1.996e-05	-++++++-++++++++-	15.1	21.208	16	0.1707	-0.0058	0.007	0.4075	---+	0.1707	0.007	0.0018	9.09e-05	-++++++-++++++++----+	0.0649
18	36350271	FHOD3	rs4799416	31478	a	g	0.7386	0.0225	0.6909	0.7771	0.0082	0.0019	2.014e-05	++++++++-+++-+++-	0	11.782	16	0.7588	0.004	0.0071	0.5691	-+++	0.7588	0.0079	0.0019	2.289e-05	++++++++-+++-+++--+++	0.8896
2	136647988	none	rs1838754	31478	c	g	0.1969	0.0277	0.1391	0.275	0.0094	0.0022	2.023e-05	+++-++++-+++0++++	0	7.812	16	0.9543	-0.0092	0.0081	0.2579	--+-	0.9543	0.0081	0.0021	0.0001415	+++-++++-+++0++++--+-	0.7432
6	148603480	none	rs12194090	31478	a	g	0.2416	0.016	0.2206	0.2699	-0.0089	0.0021	2.026e-05	+---------------+	-0.9	17.832	16	0.3338	-0.0053	0.0076	0.4878	----	0.3338	-0.0086	0.002	1.807e-05	+---------------+----	0.5712
19	4821599	TICAM1	rs4807650	31476	t	c	0.5038	0.0327	0.4728	0.5683	0.0077	0.0018	2.045e-05	+++++-++++-+++-++	6.3	19.209	16	0.258	0.0007	0.0062	0.9088	-++-	0.258	0.0071	0.0017	4.1e-05	+++++-++++-+++-++-++-	0.283
18	36345791	FHOD3	rs10164207	31478	a	g	0.7496	0.0257	0.6957	0.8	0.0082	0.0019	2.064e-05	++++++++-+++-+++-	0	11.417	16	0.7831	0.0048	0.0071	0.4968	++++	0.7831	0.008	0.0019	2.052e-05	++++++++-+++-+++-++++	0.9002
10	84789195	none	rs9421478	31478	a	g	0.7032	0.0201	0.681	0.775	-0.0078	0.0018	2.066e-05	+------+--------+	16.2	21.488	16	0.1605	0.0057	0.007	0.4147	+++-	0.1605	-0.007	0.0018	9.235e-05	+------+--------++++-	0.06141
18	36361980	FHOD3	rs17746090	31478	a	g	0.747	0.0251	0.6956	0.8	0.0082	0.0019	2.125e-05	++++++++-+++-+++-	0	12.35	16	0.7196	0.0028	0.0071	0.6921	-+++	0.7196	0.0078	0.0019	2.948e-05	++++++++-+++-+++--+++	0.87
1	98457358	none	rs11166018	31478	a	c	0.7478	0.019	0.7285	0.7877	-0.0088	0.0021	2.146e-05	-++-+---+--+----+	0	12.026	16	0.7422	-0.0099	0.0075	0.1881	---+	0.7422	-0.0089	0.002	9.371e-06	-++-+---+--+----+---+	0.8425
6	100396228	SIM1	rs3778036	30577	t	c	0.926	0.0093	0.9177	0.9543	0.0139	0.0033	2.155e-05	+++++-++-++++-+-+	3.3	18.615	16	0.2891	0.0126	0.0118	0.2861	+++-	0.2891	0.0138	0.0032	1.389e-05	+++++-++-++++-+-++++-	0.3075
18	36338528	FHOD3	rs2847515	31478	t	c	0.7451	0.0257	0.6957	0.7952	0.0082	0.0019	2.181e-05	++++++++-+++-+++-	0	11.278	16	0.792	0.0047	0.0071	0.5111	++++	0.792	0.0079	0.0019	2.218e-05	++++++++-+++-+++-++++	0.9028
9	1158193	none	rs4741150	30477	c	g	0.2809	0.0169	0.2656	0.3253	0.0082	0.0019	2.184e-05	+-+++++-?+++++++-	0	13.157	15	0.5902	-0.0103	0.0069	0.1391	---+	0.5902	0.0069	0.0019	0.0002432	+-+++++-?+++++++----+	0.3005
10	84802275	none	rs2497993	31478	a	g	0.2927	0.0183	0.23	0.3116	0.008	0.0019	2.21e-05	-++++++-++++++++-	9.4	19.866	16	0.2263	-0.0058	0.007	0.405	---+	0.2263	0.0071	0.0018	0.0001033	-++++++-++++++++----+	0.09293
6	27176103	none	rs13194053	31478	t	c	0.8379	0.0193	0.7961	0.8822	-0.0099	0.0023	2.234e-05	-+---+---+------+	18.1	21.966	16	0.1443	0.0031	0.0083	0.708	++-+	0.1443	-0.0089	0.0022	7.018e-05	-+---+---+------+++-+	0.1977
10	84772058	none	rs2484084	31478	a	g	0.3009	0.0219	0.2261	0.3241	0.0077	0.0018	2.275e-05	-++++++-++++++++-	19.1	22.238	16	0.1357	-0.0057	0.0069	0.4153	---+	0.1357	0.0069	0.0018	9.998e-05	-++++++-++++++++----+	0.04884
10	84756059	none	rs2960355	31478	a	g	0.3044	0.0193	0.24	0.3256	0.0077	0.0018	2.29e-05	-++++++-++++++++-	22.3	23.158	16	0.1096	-0.0038	0.007	0.5897	---+	0.1096	0.007	0.0018	7.427e-05	-++++++-++++++++----+	0.06372
18	36359266	FHOD3	rs17673157	31478	t	c	0.2519	0.0254	0.2	0.3043	-0.0082	0.0019	2.346e-05	--------+---+---+	0	12.19	16	0.7308	-0.0029	0.0071	0.6843	+---	0.7308	-0.0078	0.0019	3.196e-05	--------+---+---++---	0.8784
6	61104370	none	rs4039843	31478	a	t	0.1606	0.0142	0.1401	0.2046	-0.01	0.0024	2.379e-05	-----+--+---+-+--	23.9	23.638	16	0.09771	0.0008	0.0086	0.9234	-+-+	0.09771	-0.0092	0.0023	5.75e-05	-----+--+---+-+---+-+	0.06563
9	1158198	none	rs4741151	30477	a	g	0.2753	0.0152	0.256	0.3167	0.0084	0.002	2.391e-05	+-+++++-?+++++++-	0	14.554	15	0.484	-0.0105	0.007	0.1368	---+	0.484	0.007	0.0019	0.0002766	+-+++++-?+++++++----+	0.2295
6	60614159	none	rs7758698	23394	t	c	0.1725	0.016	0.1526	0.2135	-0.0116	0.0027	2.425e-05	--------+-?-+-+?-	19	19.757	14	0.138	0.0091	0.0104	0.3807	-+?+	0.138	-0.0102	0.0027	0.0001268	--------+-?-+-+?--+?+	0.07039
18	36359002	FHOD3	rs17746071	31478	t	g	0.748	0.0252	0.6957	0.8	0.0081	0.0019	2.44e-05	++++++++-+++-+++-	0	12.087	16	0.738	0.0029	0.0071	0.6826	-+++	0.738	0.0078	0.0019	3.305e-05	++++++++-+++-+++--+++	0.883
6	27168445	none	rs13219181	31478	a	g	0.8375	0.0193	0.7962	0.8821	-0.0098	0.0023	2.478e-05	-+---+----------+	18.9	22.181	16	0.1374	0.0031	0.0083	0.7079	++-+	0.1374	-0.0089	0.0022	7.701e-05	-+---+----------+++-+	0.1904
18	36357002	FHOD3	rs12966207	31477	t	g	0.7424	0.025	0.6958	0.8	0.0081	0.0019	2.503e-05	++++++++-+++-+++-	0	11.912	16	0.75	0.0026	0.0071	0.7122	-+++	0.75	0.0077	0.0019	3.537e-05	++++++++-+++-+++--+++	0.8884
3	73497637	PDZRN3	rs4677292	31478	a	g	0.4703	0.0207	0.415	0.5343	-0.0071	0.0017	2.515e-05	-++-----++--+----	46.9	33.928	16	0.005556	-0.0013	0.0061	0.8359	++--	0.005556	-0.0067	0.0016	4.254e-05	-++-----++--+----++--	0.01336
10	84790396	none	rs2991916	23394	t	g	0.6773	0.0234	0.659	0.7503	-0.0091	0.0022	2.536e-05	+------+--?----?+	12.8	18.356	14	0.1911	-0.0027	0.0087	0.7549	++?-	0.1911	-0.0088	0.0021	3.088e-05	+------+--?----?+++?-	0.2402
10	84754644	none	rs2497995	31478	t	c	0.3043	0.0194	0.2404	0.3256	0.0077	0.0018	2.549e-05	-++++++-++++++++-	22.1	23.12	16	0.1106	-0.0038	0.007	0.5897	---+	0.1106	0.007	0.0018	8.194e-05	-++++++-++++++++----+	0.06519
3	37926169	CTDSPL	rs9868023	30086	a	g	0.0334	0.0042	0.025	0.041	0.021	0.005	2.601e-05	-+-++++-++++++?+-	0	11.31	15	0.7303	-0.0215	0.0175	0.2172	---+	0.7303	0.0178	0.0048	0.0002258	-+-++++-++++++?+----+	0.5154
6	60917046	none	rs10155690	31478	a	c	0.8236	0.0147	0.78	0.8462	0.0094	0.0022	2.626e-05	+++++-++-+++-+-++	25.5	24.164	16	0.08598	-0.0017	0.0081	0.833	+-+-	0.08598	0.0086	0.0022	7.135e-05	+++++-++-+++-+-+++-+-	0.08475
14	47440928	MDGA2	rs9323140	31478	a	t	0.3674	0.0243	0.308	0.4101	0.0074	0.0018	2.63e-05	+-++++++--+--+-++	46.2	33.477	16	0.006385	-0.0004	0.0062	0.9439	---+	0.006385	0.0068	0.0017	6.55e-05	+-++++++--+--+-++---+	0.007656
9	117357553	ASTN2	rs4837138	30477	t	c	0.6347	0.0117	0.6193	0.6585	0.0074	0.0018	2.67e-05	-+++++++?++++++++	25.7	22.873	15	0.08687	-0.0027	0.0064	0.6708	+---	0.08687	0.0067	0.0017	8.294e-05	-+++++++?+++++++++---	0.1268
22	44755573	ARHGAP8	rs3788618	27003	t	c	0.5355	0.0157	0.513	0.585	0.008	0.0019	2.704e-05	+?++?++--++?+++++	0	9.272	13	0.7521	-0.0133	0.0077	0.08441	-?-+	0.7521	0.0068	0.0019	0.000261	+?++?++--++?+++++-?-+	0.1124
2	134590314	TMEM163	rs842360	31478	t	c	0.6255	0.0633	0.373	0.7187	-0.0076	0.0018	2.738e-05	++-----+-----+---	0	12.709	16	0.6939	0.0045	0.0068	0.5107	++-+	0.6939	-0.0068	0.0018	0.0001049	++-----+-----+---++-+	0.5882
20	43049710	PTPRT	rs2425570	31478	t	c	0.2195	0.0198	0.175	0.2422	-0.0091	0.0022	2.748e-05	-+--------------+	0	13.615	16	0.6274	-0.0045	0.0078	0.5699	++--	0.6274	-0.0088	0.0021	2.98e-05	-+--------------+++--	0.6607
3	73494428	PDZRN3	rs4371454	31478	a	t	0.4813	0.0167	0.436	0.5279	-0.0072	0.0017	2.761e-05	-++-----++--+----	47	33.957	16	0.005506	-0.0001	0.0061	0.9859	++--	0.005506	-0.0067	0.0017	5.83e-05	-++-----++--+----++--	0.01009
3	73499183	PDZRN3	rs12632755	31477	t	c	0.4683	0.0213	0.414	0.5349	-0.0071	0.0017	2.771e-05	-++-----++--+----	46.9	33.897	16	0.005609	-0.0014	0.0061	0.8121	++-0	0.005609	-0.0066	0.0016	4.488e-05	-++-----++--+----++-0	0.01352
6	33031552	none	rs3135195	30576.9	t	g	0.9722	0.0052	0.9565	0.9784	-0.0219	0.0052	2.781e-05	---+-------++----	19.4	22.339	16	0.1326	-0.0429	0.0265	0.1058	-?-+	0.1326	-0.0227	0.0051	9.87e-06	---+-------++-----?-+	0.05536
3	73499248	PDZRN3	rs12632758	31478	t	c	0.4685	0.0216	0.414	0.5352	-0.0071	0.0017	2.797e-05	-++-----++--+----	46.4	33.577	16	0.006192	-0.0012	0.0061	0.8423	++-+	0.006192	-0.0066	0.0016	4.725e-05	-++-----++--+----++-+	0.01474
10	84744978	none	rs1577285	31478	t	c	0.3023	0.0193	0.2415	0.325	0.0078	0.0019	2.822e-05	-++++++-++++++++-	15.3	21.26	16	0.1687	-0.003	0.007	0.6652	---+	0.1687	0.0071	0.0018	8.233e-05	-++++++-++++++++----+	0.1117
7	97342199	none	rs11765888	31478	t	c	0.7278	0.0122	0.69	0.7886	-0.0082	0.002	2.834e-05	-+--------------+	0	10.415	16	0.8441	0.0104	0.0071	0.1401	+-++	0.8441	-0.0069	0.0019	0.0002855	-+--------------++-++	0.4865
6	12775697	PHACTR1	rs6941624	31478	t	c	0.6419	0.0261	0.589	0.6996	0.0075	0.0018	2.842e-05	++++++-+++++++++-	0	8.839	16	0.9199	0.0115	0.0066	0.08363	+--+	0.9199	0.0078	0.0017	7.212e-06	++++++-+++++++++-+--+	0.8988
9	117360522	ASTN2	rs7029526	30577	a	g	0.3562	0.0114	0.3293	0.3698	-0.0074	0.0018	2.885e-05	+-------?--------	9.9	18.872	15	0.2196	0.0049	0.0063	0.4394	++++	0.2196	-0.0065	0.0017	0.000134	+-------?--------++++	0.2244
18	36363343	FHOD3	rs2077673	31478	a	g	0.2564	0.0253	0.2001	0.3045	-0.0081	0.0019	2.899e-05	--------+---+---+	0	12.557	16	0.7048	-0.0026	0.0071	0.7128	+---	0.7048	-0.0077	0.0019	4.099e-05	--------+---+---++---	0.8601
9	1166779	none	rs4741162	30477	a	g	0.2844	0.0156	0.261	0.3169	0.0077	0.0018	2.939e-05	+-+++++-?+++++++-	0	12.565	15	0.6359	-0.0106	0.0069	0.1234	-+-+	0.6359	0.0065	0.0018	0.000301	+-+++++-?+++++++--+-+	0.2907
16	24302331	CACNG3	rs12599474	31478	a	g	0.7181	0.0106	0.683	0.7406	0.0078	0.0019	2.944e-05	++++++++++++++++-	0	10.579	16	0.8347	0.0005	0.0068	0.9459	-++-	0.8347	0.0073	0.0018	5.633e-05	++++++++++++++++--++-	0.5269
9	1170011	none	rs2152850	30477	a	g	0.7123	0.0155	0.6805	0.735	-0.0077	0.0019	2.965e-05	-+-----+?------++	0	12.616	15	0.6319	0.0096	0.0069	0.1618	++++	0.6319	-0.0065	0.0018	0.0002668	-+-----+?------++++++	0.3562
5	174391446	none	rs2964041	28294	c	g	0.9706	0.0057	0.9529	0.9808	-0.0236	0.0056	2.972e-05	-++?-+-+----+---+	27.6	23.466	15	0.07473	-0.0116	0.0183	0.5275	--+-	0.07473	-0.0225	0.0054	3.053e-05	-++?-+-+----+---+--+-	0.07256
6	12777216	PHACTR1	rs7757205	31478	a	g	0.357	0.0242	0.3004	0.412	-0.0074	0.0018	2.999e-05	------+---------+	0	8.899	16	0.9175	-0.0114	0.0066	0.08476	-++-	0.9175	-0.0077	0.0017	7.718e-06	------+---------+-++-	0.8955
5	174395262	none	rs2936944	28294	t	c	0.0281	0.0048	0.0193	0.0471	0.0236	0.0057	3.025e-05	+--?+-+-++++-++--	28.9	23.9	15	0.06681	0.0119	0.0183	0.5157	++-+	0.06681	0.0226	0.0054	3.048e-05	+--?+-+-++++-++--++-+	0.06539
6	57496745	PRIM2	rs12198315	31478	a	c	0.1644	0.0116	0.1488	0.1983	-0.0106	0.0025	3.03e-05	--------+-----+-+	4	18.758	16	0.2814	-0.0029	0.0086	0.7329	-+-+	0.2814	-0.01	0.0024	4.579e-05	--------+-----+-+-+-+	0.269
2	134587538	TMEM163	rs842358	31478	a	g	0.3727	0.0629	0.2813	0.627	0.0075	0.0018	3.077e-05	--+++++-+++++-+++	0	12.64	16	0.6988	-0.0046	0.0068	0.5036	--+-	0.6988	0.0068	0.0018	0.0001179	--+++++-+++++-+++--+-	0.587
3	113907797	GRAMD1C	rs4682146	31478	c	g	0.6759	0.0164	0.6486	0.711	0.0078	0.0019	3.079e-05	++++++++--+++++++	13.4	20.789	16	0.1868	-0.0035	0.0065	0.5866	++--	0.1868	0.007	0.0018	0.000124	++++++++--+++++++++--	0.223
2	40970870	none	rs13023575	28294	t	c	0.3555	0.0517	0.2485	0.3981	0.0084	0.002	3.08e-05	+-+?-++--++++++++	0.4	17.067	15	0.3149	0.0112	0.0067	0.09719	++++	0.3149	0.0087	0.0019	8.234e-06	+-+?-++--++++++++++++	0.5406
2	159231023	TANC1	rs3821301	31478	t	g	0.1096	0.0135	0.0724	0.151	0.0113	0.0027	3.101e-05	++++++++-++++--++	0	11.509	16	0.7771	-0.0016	0.0098	0.8724	++--	0.7771	0.0104	0.0026	7.947e-05	++++++++-++++--++++--	0.5195
9	117349258	ASTN2	rs7862181	30477	a	t	0.6356	0.0135	0.6199	0.6663	0.0073	0.0018	3.211e-05	-+++++++?++++++++	16.4	20.328	15	0.1597	-0.0047	0.0063	0.4504	----	0.1597	0.0065	0.0017	0.0001441	-+++++++?++++++++----	0.166
4	1122837	TMED11P	rs17164353	31478	a	g	0.0268	0.0037	0.0176	0.0336	0.023	0.0055	3.214e-05	+++++++-+++++++++	0	8.755	16	0.9232	0.0091	0.0171	0.592	+-++	0.9232	0.0217	0.0053	3.883e-05	+++++++-++++++++++-++	0.8872
20	43052697	PTPRT	rs2425572	31478	t	c	0.2054	0.021	0.166	0.234	-0.009	0.0022	3.222e-05	-+--------------+	0	13.208	16	0.6575	-0.0061	0.0078	0.434	++--	0.6575	-0.0088	0.0021	2.661e-05	-+--------------+++--	0.6693
4	152214799	none	rs11728805	31478	t	c	0.0964	0.012	0.0824	0.1387	0.0121	0.0029	3.234e-05	+--+-++--+++++++-	0	13.911	16	0.6053	0.0107	0.0104	0.3045	+++-	0.6053	0.012	0.0028	2.092e-05	+--+-++--+++++++-+++-	0.634
15	79573567	none	rs1765257	31478	a	t	0.7963	0.0134	0.7601	0.8208	-0.0089	0.0021	3.24e-05	------------+++--	0	11.675	16	0.766	-0.0002	0.0078	0.9761	+--+	0.766	-0.0083	0.0021	6.608e-05	------------+++--+--+	0.7687
4	1121941	TMED11P	rs17164350	31478	t	c	0.9728	0.0037	0.9664	0.9824	-0.023	0.0055	3.254e-05	-------+---------	0	8.75	16	0.9234	-0.0091	0.0171	0.592	-+--	0.9234	-0.0217	0.0053	3.93e-05	-------+----------+--	0.8875
9	117350770	ASTN2	rs10818028	30477	a	g	0.3579	0.0123	0.3303	0.375	-0.0074	0.0018	3.256e-05	+-------?--------	14.7	19.925	15	0.1748	0.0041	0.0063	0.513	++++	0.1748	-0.0066	0.0017	0.000131	+-------?--------++++	0.2036
3	113927809	GRAMD1C	rs4422272	31477	t	c	0.3267	0.0172	0.287	0.353	-0.0077	0.0018	3.296e-05	--------++--+----	2.4	18.443	16	0.2986	0.0027	0.0064	0.6746	--++	0.2986	-0.0069	0.0018	0.0001157	--------++--+------++	0.3665
4	1118928	TMED11P	rs17164349	31478	t	c	0.9732	0.0037	0.9665	0.9824	-0.023	0.0055	3.297e-05	-------+---------	0	8.697	16	0.9254	-0.0092	0.0171	0.5889	-+--	0.9254	-0.0217	0.0053	3.958e-05	-------+----------+--	0.8897
4	1117178	TMED11P	rs17164346	31478	a	g	0.0268	0.0036	0.0176	0.0334	0.023	0.0055	3.306e-05	+++++++-+++++++++	0	8.653	16	0.927	0.0096	0.0171	0.5764	+-++	0.927	0.0217	0.0053	3.861e-05	+++++++-++++++++++-++	0.8983
4	69412517	none	rs2736449	22949	a	c	0.7191	0.0149	0.6854	0.735	0.012	0.0029	3.319e-05	+?+-++++++?++++?+	0	9.864	13	0.705	-0.0039	0.0107	0.715	--?+	0.705	0.0109	0.0028	9.524e-05	+?+-++++++?++++?+--?+	0.7111
6	12810704	PHACTR1	rs7760286	31478	a	g	0.6531	0.0239	0.604	0.7087	0.0076	0.0018	3.33e-05	++++++-+++++++++-	0	10.474	16	0.8407	0.0131	0.0068	0.05467	+--+	0.8407	0.008	0.0018	6.797e-06	++++++-+++++++++-+--+	0.766
3	8988635	SRGAP3	rs11929259	28294	t	c	0.0308	0.0036	0.0264	0.0448	-0.0281	0.0068	3.344e-05	---?------------+	0	9.569	15	0.8459	-0.0271	0.0258	0.2933	+---	0.8459	-0.0281	0.0066	1.972e-05	---?------------++---	0.8859
2	159228022	TANC1	rs2288111	31478	a	g	0.1097	0.0135	0.0724	0.151	0.0113	0.0027	3.359e-05	++++++++-++++--++	0	11.475	16	0.7793	-0.0016	0.0098	0.8728	++--	0.7793	0.0103	0.0026	8.547e-05	++++++++-++++--++++--	0.5172
20	43037738	PTPRT	rs2425544	31478	a	g	0.7333	0.0119	0.7176	0.7571	0.0079	0.0019	3.363e-05	+-++++-+++++++++-	-0.9	17.844	16	0.3331	0.0028	0.0071	0.698	--++	0.3331	0.0076	0.0019	4.37e-05	+-++++-+++++++++---++	0.2524
18	54356731	none	rs1787824	31478	t	c	0.6881	0.0133	0.6613	0.7272	0.0075	0.0018	3.381e-05	+-++-++++++++-+++	0	12.23	16	0.728	-0.0036	0.0067	0.5911	+--+	0.728	0.0068	0.0018	0.0001206	+-++-++++++++-++++--+	0.2048
16	24306534	CACNG3	rs1859199	31478	c	g	0.7555	0.0111	0.712	0.7715	0.0084	0.002	3.387e-05	++++++++++++++++-	0	13.362	16	0.6461	0.0018	0.0073	0.8096	-++-	0.6461	0.0079	0.002	5.293e-05	++++++++++++++++--++-	0.3623
20	43028945	PTPRT	rs206163	31478	a	g	0.2679	0.012	0.2431	0.2829	-0.0079	0.0019	3.388e-05	-+----+---------+	5.4	19.026	16	0.2673	-0.0028	0.0071	0.6892	++--	0.2673	-0.0076	0.0019	4.352e-05	-+----+---------+++--	0.2123
5	174405862	none	rs2913513	28294	a	g	0.0279	0.0048	0.0196	0.0474	0.0234	0.0057	3.432e-05	+--?+-+-++++0+++-	27.2	23.353	15	0.07693	0.0122	0.0183	0.5061	++-+	0.07693	0.0225	0.0054	3.371e-05	+--?+-+-++++0+++-++-+	0.07279
5	174404443	none	rs2913507	27392.5	t	c	0.9721	0.0048	0.9526	0.9804	-0.0234	0.0057	3.466e-05	-++?-+-+----0---+	27.2	23.356	15	0.07687	-0.0122	0.0183	0.5061	--+-	0.07687	-0.0225	0.0054	3.402e-05	-++?-+-+----0---+--+-	0.07295
5	174404925	none	rs2913508	28294	a	g	0.0279	0.0048	0.0196	0.0474	0.0234	0.0057	3.467e-05	+--?+-+-++++0+++-	27.2	23.364	15	0.07672	0.0122	0.0183	0.5055	++-+	0.07672	0.0225	0.0054	3.398e-05	+--?+-+-++++0+++-++-+	0.07258
5	174403989	none	rs2964050	28294	a	g	0.9721	0.0048	0.9526	0.9804	-0.0234	0.0057	3.491e-05	-++?-+-+----0---+	27.3	23.372	15	0.07656	-0.0122	0.0183	0.506	--+-	0.07656	-0.0224	0.0054	3.425e-05	-++?-+-+----0---+--+-	0.07257
2	159227751	TANC1	rs2042495	31477	a	g	0.1096	0.0135	0.0724	0.151	0.0112	0.0027	3.519e-05	++++++++-++++--++	0	11.683	16	0.7655	-0.0015	0.0098	0.8748	++--	0.7655	0.0103	0.0026	8.9e-05	++++++++-++++--++++--	0.5039
20	43030105	PTPRT	rs6030610	31478	a	t	0.2676	0.012	0.243	0.2827	-0.0079	0.0019	3.533e-05	-+----+---------+	4.3	18.815	16	0.2784	-0.0029	0.0071	0.6871	++--	0.2784	-0.0076	0.0019	4.514e-05	-+----+---------+++--	0.2189
11	88113588	RAB38	rs9144	31478	t	c	0.5891	0.0144	0.532	0.62	-0.0074	0.0018	3.533e-05	---+---++--------	0	12.376	16	0.7177	0.0073	0.0063	0.2484	+++-	0.7177	-0.0063	0.0017	0.0002594	---+---++--------+++-	0.5175
14	101556741	none	rs1190715	31478	t	c	0.5109	0.0142	0.4861	0.537	0.0074	0.0018	3.542e-05	++-+++++-+++++++-	0	7.742	16	0.9562	0.0006	0.0064	0.9294	++-+	0.9562	0.0069	0.0017	6.557e-05	++-+++++-+++++++-++-+	0.8533
20	43044694	PTPRT	rs2425562	31478	t	c	0.7334	0.0118	0.7174	0.757	0.008	0.0019	3.55e-05	+-++++-+++++++++-	-3.5	17.384	16	0.3612	0.0028	0.0072	0.6936	--++	0.3612	0.0076	0.0019	4.578e-05	+-++++-+++++++++---++	0.2719
4	69407158	none	rs1982902	22949	t	c	0.7187	0.0147	0.6854	0.7339	0.0119	0.0029	3.561e-05	+?+-++++++?++++?+	0	9.832	13	0.7076	-0.004	0.0107	0.7098	--?+	0.7076	0.0109	0.0028	0.0001026	+?+-++++++?++++?+--?+	0.7093
11	99484946	CNTN5	rs7123538	31478	t	g	0.7725	0.0185	0.7075	0.7909	-0.0085	0.0021	3.59e-05	--------+--------	0	7.128	16	0.9707	-0.001	0.0076	0.8912	-+-+	0.9707	-0.008	0.002	6.122e-05	--------+---------+-+	0.959
5	174401135	none	rs2936939	28294	t	c	0.0279	0.0048	0.0195	0.0473	0.0234	0.0057	3.616e-05	+--?+-+-++++0+++-	27.6	23.49	15	0.07427	0.0121	0.0183	0.5074	++-+	0.07427	0.0224	0.0054	3.553e-05	+--?+-+-++++0+++-++-+	0.07128
18	40342050	none	rs10163903	28294	a	t	0.9553	0.0082	0.9296	0.971	0.0183	0.0044	3.652e-05	+++?+++++-++-++++	0	10.189	15	0.8077	-0.0151	0.0146	0.3014	-+-+	0.8077	0.0155	0.0043	0.0002762	+++?+++++-++-++++-+-+	0.4564
9	117349461	ASTN2	rs7862524	30477	t	c	0.3628	0.0133	0.3337	0.3801	-0.0073	0.0018	3.655e-05	+-------?--------	16.3	20.32	15	0.16	0.0047	0.0063	0.4575	++++	0.16	-0.0064	0.0017	0.0001597	+-------?--------++++	0.1683
8	131141423	none	rs13273225	31476	a	g	0.0546	0.0073	0.0401	0.0764	-0.0153	0.0037	3.692e-05	---------+------+	0	12.399	16	0.7161	-0.0184	0.0143	0.1989	----	0.7161	-0.0156	0.0036	1.609e-05	---------+------+----	0.8815
13	22269440	LINC00540	rs17076478	31478	a	c	0.9502	0.017	0.927	0.9711	0.0187	0.0045	3.764e-05	+-+-+++++++++++++	7.2	19.395	16	0.2487	-0.0216	0.0144	0.1331	--+-	0.2487	0.0151	0.0044	0.0005024	+-+-+++++++++++++--+-	0.09917
2	45953853	PRKCE	rs2711293	31478	t	g	0.2843	0.0148	0.266	0.3171	-0.008	0.0019	3.787e-05	---------------+-	5.6	19.069	16	0.2651	-0.0052	0.0069	0.4479	---+	0.2651	-0.0078	0.0019	3.147e-05	---------------+----+	0.4752
20	43030410	PTPRT	rs6030613	31478	a	g	0.2673	0.012	0.243	0.2826	-0.0079	0.0019	3.79e-05	-+----+---------+	2.5	18.458	16	0.2978	-0.0028	0.0071	0.6961	++--	0.2978	-0.0075	0.0019	4.882e-05	-+----+---------+++--	0.2321
6	30761709	none	rs11966040	30576.8	t	g	0.9773	0.0038	0.9652	0.9884	-0.0232	0.0056	3.808e-05	+-+----++-------+	0	12.779	16	0.6889	-0.012	0.0242	0.6191	-?-+	0.6889	-0.0225	0.0055	4.142e-05	+-+----++-------+-?-+	0.5513
3	73502351	PDZRN3	rs7426511	31478	a	t	0.5314	0.0223	0.4643	0.585	0.007	0.0017	3.82e-05	+--+++++--++-++++	46.1	33.389	16	0.00656	0.0015	0.0062	0.8103	--+-	0.00656	0.0066	0.0016	6.047e-05	+--+++++--++-++++--+-	0.01626
9	8254634	none	rs7872805	30477	a	c	0.3883	0.0237	0.3437	0.4153	-0.0078	0.0019	3.843e-05	--+-----?---++---	53.7	36.698	15	0.0014	0.005	0.007	0.4687	--+-	0.0014	-0.0069	0.0018	0.0001765	--+-----?---++-----+-	0.0009908
20	43056862	PTPRT	rs3092215	31476	t	c	0.2186	0.019	0.176	0.2416	-0.0084	0.002	3.868e-05	-+--------------+	0	14.089	16	0.5921	-0.0055	0.0076	0.47	++--	0.5921	-0.0082	0.002	3.424e-05	-+--------------+++--	0.6122
16	24301446	CACNG3	rs7204986	31478	t	c	0.7174	0.0122	0.684	0.7413	0.0077	0.0019	3.87e-05	++++++++++++++++-	0	10.399	16	0.845	-0.0001	0.0069	0.988	-++-	0.845	0.0071	0.0018	7.921e-05	++++++++++++++++--++-	0.517
9	117359656	ASTN2	rs10983635	30477	a	t	0.6238	0.0104	0.6115	0.6449	0.0072	0.0017	3.887e-05	-+++++++?++++++++	23.5	22.224	15	0.1021	-0.0021	0.0063	0.74	+---	0.1021	0.0065	0.0017	0.000106	-+++++++?+++++++++---	0.151
4	86506295	none	rs12508156	31478	t	c	0.985	0.0051	0.9703	0.995	0.0294	0.0072	3.888e-05	++++-++++-++++++-	0	7.668	16	0.9581	0.0073	0.0264	0.7824	+++-	0.9581	0.0278	0.0069	5.969e-05	++++-++++-++++++-+++-	0.9867
2	159227712	TANC1	rs2042494	31478	a	g	0.8903	0.0137	0.849	0.9276	-0.0112	0.0027	3.917e-05	--------+----++--	0	11.606	16	0.7706	0.0015	0.0098	0.8748	--++	0.7706	-0.0102	0.0026	9.823e-05	--------+----++----++	0.5095
9	117358993	ASTN2	rs10759918	30477	a	g	0.6237	0.0104	0.6115	0.6449	0.0072	0.0017	3.931e-05	-+++++++?++++++++	23.5	22.235	15	0.1018	-0.0021	0.0063	0.7371	+---	0.1018	0.0065	0.0017	0.0001076	-+++++++?+++++++++---	0.1502
14	47435446	MDGA2	rs2416075	31477	a	g	0.6245	0.0213	0.584	0.682	-0.0071	0.0017	3.991e-05	-+--+---++-++-+--	46.1	33.399	16	0.006541	-0.0002	0.0062	0.9785	+++-	0.006541	-0.0066	0.0017	8.419e-05	-+--+---++-++-+--+++-	0.008782
6	60475250	none	rs12200158	28294	t	c	0.1641	0.0121	0.1487	0.1992	-0.0107	0.0026	3.995e-05	---?----+-----+-+	12.7	19.477	15	0.1929	-0.0024	0.0086	0.7771	-+-+	0.1929	-0.01	0.0025	6.465e-05	---?----+-----+-+-+-+	0.1705
16	24302074	CACNG3	rs13337712	31478	a	g	0.268	0.0093	0.2552	0.31	-0.0079	0.0019	3.999e-05	----------------+	0	11.026	16	0.8079	-0.0007	0.007	0.9192	+--+	0.8079	-0.0073	0.0018	7.284e-05	----------------++--+	0.4777
2	136657211	none	rs1838752	31478	t	c	0.8029	0.0272	0.724	0.8605	-0.009	0.0022	4.028e-05	--++----+---+----	0	8.444	16	0.9345	0.0094	0.008	0.2435	++-+	0.9345	-0.0077	0.0021	0.000269	--++----+---+----++-+	0.7236
6	28746983	none	rs7763390	31478	a	c	0.8413	0.0145	0.8217	0.887	0.0096	0.0023	4.048e-05	+-+++++++++++-++-	0	14.728	16	0.5446	0.0034	0.0087	0.6961	-++-	0.5446	0.0092	0.0023	4.859e-05	+-+++++++++++-++--++-	0.4596
16	24300307	CACNG3	rs8055531	31478	t	g	0.268	0.009	0.2549	0.309	-0.0079	0.0019	4.077e-05	----------------+	0	11.099	16	0.8033	-0.0002	0.007	0.9744	+--+	0.8033	-0.0073	0.0019	7.98e-05	----------------++--+	0.4519
5	174397173	none	rs2936942	28294	a	c	0.972	0.0048	0.9527	0.9805	-0.0232	0.0057	4.083e-05	-++?-+-+----0--++	28.5	23.773	15	0.06904	-0.0121	0.0183	0.5077	--+-	0.06904	-0.0223	0.0054	3.994e-05	-++?-+-+----0--++--+-	0.06749
6	168848090	none	rs9455487	31478	a	g	0.5153	0.0174	0.4724	0.567	0.0071	0.0017	4.105e-05	+-+++-+-+-++0+++-	0	13.549	16	0.6322	0.0078	0.0061	0.1975	-+++	0.6322	0.0071	0.0017	1.889e-05	+-+++-+-+-++0+++--+++	0.8081
6	25663956	SCGN	rs9467556	30576.8	t	c	0.8324	0.01	0.8142	0.874	0.0095	0.0023	4.209e-05	+-+++++-+-+-+-++-	18.1	21.965	16	0.1443	-0.013	0.0084	0.122	+---	0.1443	0.0079	0.0022	0.000435	+-+++++-+-+-+-++-+---	0.05518
13	41260969	MTRF1	rs3818722	23394	a	g	0.7599	0.0107	0.7379	0.7759	0.0101	0.0025	4.221e-05	+++++++--+?-++-?-	-13.1	14.151	14	0.4386	-0.0145	0.0092	0.1147	+-?-	0.4386	0.0085	0.0024	0.0004102	+++++++--+?-++-?-+-?-	0.04512
6	33517843	none	rs210181	28294	a	g	0.0191	0.0038	0.0113	0.0264	0.0284	0.0069	4.236e-05	++-?++++++---+++-	14.8	19.948	15	0.1739	0.0058	0.0256	0.8199	+-++	0.1739	0.0269	0.0067	6.387e-05	++-?++++++---+++-+-++	0.2251
6	60484025	none	rs9396341	28294	a	g	0.8357	0.012	0.8007	0.8514	0.0106	0.0026	4.263e-05	+++?++++-+++++-+-	12.7	19.482	15	0.1927	0.0024	0.0086	0.7832	+-+-	0.1927	0.0099	0.0025	6.935e-05	+++?++++-+++++-+-+-+-	0.1684
14	47427665	MDGA2	rs7148160	31475	a	g	0.3742	0.0228	0.318	0.4162	0.0072	0.0018	4.27e-05	+-++-+++--+--+-++	45.6	33.074	16	0.007226	-0.0001	0.0062	0.9935	---+	0.007226	0.0066	0.0017	9.403e-05	+-++-+++--+--+-++---+	0.009267
6	58186453	none	rs3864327	20228	a	g	0.8342	0.0101	0.821	0.871	-0.0135	0.0033	4.273e-05	?-------0-?----?-	0	5.671	13	0.9573	0.0024	0.0109	0.8231	-+?+	0.9573	-0.0122	0.0032	0.0001202	?-------0-?----?--+?+	0.7729
6	60483087	none	rs6934172	28294	t	c	0.1645	0.012	0.1486	0.1993	-0.0106	0.0026	4.276e-05	---?----+-----+-+	12.8	19.486	15	0.1925	-0.0024	0.0086	0.7832	-+-+	0.1925	-0.0099	0.0025	6.955e-05	---?----+-----+-+-+-+	0.1683
6	12859847	PHACTR1	rs9395190	31478	t	c	0.6646	0.031	0.594	0.7437	0.0073	0.0018	4.308e-05	++++++++++++++++-	0	7.86	16	0.9529	0.014	0.0066	0.03454	+-++	0.9529	0.0078	0.0017	6.951e-06	++++++++++++++++-+-++	0.9447
13	22269168	LINC00540	rs17076477	31476	a	g	0.9501	0.0171	0.927	0.9711	0.0186	0.0045	4.346e-05	+-+-+++++++++++++	6.6	19.263	16	0.2552	-0.0215	0.0144	0.1356	--+-	0.2552	0.015	0.0043	0.0005581	+-+-+++++++++++++--+-	0.1046
6	12859653	PHACTR1	rs9296494	30577	a	g	0.6644	0.0311	0.594	0.7437	0.0073	0.0018	4.352e-05	++++++++++++++++-	0	7.877	16	0.9524	0.014	0.0066	0.0346	+-++	0.9524	0.0077	0.0017	7.035e-06	++++++++++++++++-+-++	0.9441
3	172484659	none	rs2901790	31478	t	c	0.2539	0.0206	0.209	0.2957	0.0082	0.002	4.366e-05	++++++++-++++-+++	0	10.228	16	0.8544	0.0144	0.007	0.04084	++++	0.8544	0.0086	0.0019	7.733e-06	++++++++-++++-+++++++	0.9392
2	136648353	none	rs13014281	31478	a	g	0.1865	0.027	0.1251	0.258	0.0092	0.0022	4.378e-05	+++-++++-+++-++++	0	8.006	16	0.9487	-0.012	0.0083	0.1473	-+--	0.9487	0.0077	0.0022	0.0003727	+++-++++-+++-++++-+--	0.7157
2	136655491	none	rs9789419	31478	t	c	0.1965	0.0273	0.1395	0.276	0.0089	0.0022	4.42e-05	++--++++-+++-++++	0	8.855	16	0.9193	-0.0093	0.008	0.2461	--+-	0.9193	0.0077	0.0021	0.0002888	++--++++-+++-++++--+-	0.6996
14	47437278	MDGA2	rs10136665	31478	a	g	0.6243	0.021	0.584	0.682	-0.0071	0.0017	4.434e-05	-+--+---++-++-+--	45.5	33.032	16	0.007317	-0.0002	0.0062	0.973	+++-	0.007317	-0.0066	0.0017	9.236e-05	-+--+---++-++-+--+++-	0.009817
9	1139038	none	rs7866691	30477	t	c	0.7535	0.0178	0.7042	0.781	-0.0082	0.002	4.492e-05	-+-----+?-+-----+	0	12.693	15	0.626	0.0127	0.0072	0.07954	++++	0.626	-0.0067	0.0019	0.0005657	-+-----+?-+-----+++++	0.2913
6	33988694	none	rs4256433	28649	t	c	0.2825	0.0147	0.2463	0.2955	-0.0099	0.0024	4.503e-05	-?+-?----+--+----	15	18.826	14	0.1717	-0.0007	0.0076	0.9263	-++-	0.1717	-0.009	0.0023	9.805e-05	-?+-?----+--+-----++-	0.304
10	33596681	none	rs11009462	31478	t	c	0.8753	0.0133	0.8406	0.89	-0.0105	0.0026	4.519e-05	-+-----+-+----+--	8.7	19.719	16	0.2331	0.0034	0.0097	0.7254	---+	0.2331	-0.0096	0.0025	0.0001279	-+-----+-+----+-----+	0.1073
20	62013572	TAF4	rs7273659	31478	t	c	0.0141	0.0046	0.005	0.0231	-0.0299	0.0073	4.569e-05	-+-----+-----+---	10.8	20.175	16	0.2124	-0.0326	0.0407	0.423	++?-	0.2124	-0.0299	0.0073	3.691e-05	-+-----+-----+---++?-	0.2489
18	54317535	POLI	rs649722	31478	a	g	0.6852	0.0115	0.6674	0.724	0.0075	0.0019	4.598e-05	+-++-++++++++-+++	0	12.355	16	0.7192	-0.0011	0.0068	0.8683	+--+	0.7192	0.0069	0.0018	0.0001087	+-++-++++++++-++++--+	0.357
5	174405783	none	rs2913512	28294	t	c	0.9729	0.0045	0.9526	0.9804	-0.0232	0.0057	4.601e-05	-++?-+-+----0---+	27.3	23.38	15	0.07639	-0.0127	0.0186	0.4938	--+-	0.07639	-0.0223	0.0055	4.325e-05	-++?-+-+----0---+--+-	0.07314
6	27283599	none	rs13207082	31478	a	g	0.9177	0.014	0.8806	0.951	-0.0129	0.0032	4.617e-05	---------+----+-+	0	14.279	16	0.578	-0.0094	0.0104	0.3692	++--	0.578	-0.0126	0.003	3.36e-05	---------+----+-+++--	0.7552
18	40341707	none	rs10163816	31478	t	c	0.0444	0.0082	0.029	0.0704	-0.0178	0.0044	4.626e-05	---------+--+----	0	10.474	16	0.8407	0.0151	0.0146	0.3022	+-+-	0.8407	-0.0151	0.0042	0.0003234	---------+--+----+-+-	0.5133
18	54317404	POLI	rs535154	31478	a	g	0.6855	0.0115	0.6675	0.724	0.0075	0.0019	4.639e-05	+-++-++++++++-+++	0	12.294	16	0.7235	-0.0012	0.0068	0.8562	+--+	0.7235	0.0069	0.0018	0.0001116	+-++-++++++++-++++--+	0.3646
18	54317424	POLI	rs1787828	31478	a	g	0.3145	0.0114	0.276	0.3326	-0.0075	0.0019	4.647e-05	-+--+--------+---	0	12.337	16	0.7205	0.0012	0.0068	0.8535	-++-	0.7205	-0.0069	0.0018	0.0001122	-+--+--------+----++-	0.3605
9	1172429	none	rs1337625	30477	c	g	0.7364	0.0201	0.7036	0.769	-0.0079	0.002	4.656e-05	-+-----+?-+-----+	-7.9	15.758	15	0.3983	0.0112	0.0071	0.1175	++++	0.3983	-0.0066	0.0019	0.0004787	-+-----+?-+-----+++++	0.2117
8	89176724	none	rs12056356	31478	a	g	0.9149	0.0081	0.9085	0.938	-0.013	0.0032	4.665e-05	--+--+--++------+	0	14.93	16	0.5298	0.0222	0.0111	0.04574	+++-	0.5298	-0.0103	0.0031	0.0008264	--+--+--++------++++-	0.1029
9	1154453	none	rs7871304	30477	a	g	0.246	0.0207	0.2056	0.2952	0.0082	0.002	4.716e-05	+-+++++-?+-+++++-	0	13.433	15	0.5689	-0.012	0.0072	0.09563	----	0.5689	0.0067	0.002	0.0005652	+-+++++-?+-+++++-----	0.2684
16	77421631	ADAMTS18	rs919374	31478	a	g	0.3039	0.0153	0.2698	0.3194	-0.0077	0.0019	4.761e-05	---------+------+	0	9.32	16	0.8997	-0.0108	0.0068	0.1131	----	0.8997	-0.0079	0.0018	1.552e-05	---------+------+----	0.961
20	62023003	TAF4	rs8121843	31478	a	g	0.9858	0.0046	0.9769	0.995	0.0297	0.0073	4.77e-05	+-+++++-+++++-+++	7.6	19.477	16	0.2447	0.0464	0.04	0.2455	+-?+	0.2447	0.0302	0.0072	2.9e-05	+-+++++-+++++-++++-?+	0.2986
20	43056396	PTPRT	rs713108	31478	a	g	0.2149	0.0194	0.1749	0.2404	-0.0084	0.0021	4.822e-05	-+--------------+	0	13.896	16	0.6065	-0.0058	0.0076	0.4469	++--	0.6065	-0.0082	0.002	4.053e-05	-+--------------+++--	0.6211
11	65458715	LOC101927789	rs1626021	31474	a	g	0.6782	0.0084	0.6508	0.6929	-0.0074	0.0018	4.842e-05	----++----------+	0	10.867	16	0.8176	-0.0029	0.0067	0.6586	---+	0.8176	-0.0071	0.0018	5.781e-05	----++----------+---+	0.8971
16	77421423	ADAMTS18	rs919376	31478	t	c	0.304	0.0152	0.27	0.3194	-0.0076	0.0019	4.861e-05	---------+------+	0	9.314	16	0.8999	-0.0108	0.0068	0.1135	----	0.8999	-0.0079	0.0018	1.588e-05	---------+------+----	0.9613
6	60702790	none	rs10949183	22493	t	c	0.8273	0.0162	0.7854	0.8493	0.0106	0.0026	4.882e-05	+++++-++-+?+-+-?+	30.6	23.069	14	0.05916	-0.0089	0.0103	0.3872	+-?-	0.05916	0.0094	0.0026	0.0002161	+++++-++-+?+-+-?++-?-	0.03386
15	91685870	none	rs7497971	31478	a	g	0.3415	0.0126	0.323	0.3756	0.0075	0.0018	4.888e-05	++++++++-++++-+++	0	9.754	16	0.8791	0.0058	0.0067	0.3862	+-++	0.8791	0.0074	0.0018	3.713e-05	++++++++-++++-++++-++	0.9567
11	99461267	CNTN5	rs2726391	31478	t	c	0.3774	0.0232	0.3538	0.4398	0.0071	0.0017	4.912e-05	+-++-+++-++-+0+++	3.7	18.695	16	0.2848	0.0036	0.0065	0.5823	+++-	0.2848	0.0068	0.0017	5.183e-05	+-++-+++-++-+0++++++-	0.4814
14	47434004	MDGA2	rs10138882	31478	t	c	0.626	0.0224	0.5842	0.684	-0.0071	0.0017	4.936e-05	-+--+---++-++-+--	46.6	33.68	16	0.005998	-0.0002	0.0062	0.9687	+++-	0.005998	-0.0066	0.0017	0.0001018	-+--+---++-++-+--+++-	0.00765
6	57509346	PRIM2	rs3805793	28294	c	g	0.1647	0.0119	0.1488	0.1983	-0.0106	0.0026	4.948e-05	---?----+-----+-+	10.5	18.99	15	0.2142	-0.0028	0.0086	0.7428	-+-+	0.2142	-0.0099	0.0025	7.484e-05	---?----+-----+-+-+-+	0.206
18	71584277	none	rs12961992	23394	a	c	0.3881	0.0183	0.3619	0.4319	-0.0087	0.0021	5.027e-05	----+--++-?--0+?+	26.8	21.856	14	0.08163	0.0008	0.0082	0.9196	++?-	0.08163	-0.0081	0.0021	0.000107	----+--++-?--0+?+++?-	0.1186
6	57366123	none	rs12197484	28294	c	g	0.8353	0.0119	0.8017	0.8512	0.0106	0.0026	5.066e-05	+++?++++-+++++-+-	10.1	18.913	15	0.2177	0.0029	0.0086	0.7371	+-+-	0.2177	0.0099	0.0025	7.577e-05	+++?++++-+++++-+-+-+-	0.2117
6	57501279	PRIM2	rs12210940	28294	a	t	0.8353	0.0119	0.8017	0.8512	0.0106	0.0026	5.073e-05	+++?++++-+++++-+-	10.1	18.915	15	0.2176	0.0029	0.0086	0.7372	+-+-	0.2176	0.0099	0.0025	7.588e-05	+++?++++-+++++-+-+-+-	0.2116
6	57502488	PRIM2	rs7748620	28294	t	c	0.8353	0.0119	0.8017	0.8512	0.0106	0.0026	5.077e-05	+++?++++-+++++-+-	10.2	18.921	15	0.2173	0.0029	0.0086	0.7373	+-+-	0.2173	0.0099	0.0025	7.595e-05	+++?++++-+++++-+-+-+-	0.2113
4	165698148	none	rs2125698	28294	t	c	0.8887	0.0121	0.8579	0.9062	0.0127	0.0031	5.09e-05	+--?+++--++-+-0++	-10.1	15.436	15	0.4205	0.01	0.0109	0.3553	+++-	0.4205	0.0125	0.003	3.507e-05	+--?+++--++-+-0+++++-	0.3836
3	37915720	CTDSPL	rs6768915	30086	a	g	0.9651	0.0052	0.9575	0.975	-0.0203	0.005	5.091e-05	+-+----+------?-+	0	10.193	15	0.8074	0.0205	0.0175	0.2419	+++-	0.8074	-0.0172	0.0048	0.000372	+-+----+------?-++++-	0.6352
18	40319072	none	rs12961105	31478	a	g	0.044	0.0084	0.029	0.0703	-0.0176	0.0043	5.094e-05	---------+--+----	0	10.804	16	0.8214	0.0149	0.0147	0.3119	+-+-	0.8214	-0.015	0.0042	0.0003357	---------+--+----+-+-	0.5023
10	84794300	none	rs7906672	23394	a	g	0.7055	0.0226	0.682	0.775	-0.0088	0.0022	5.113e-05	+------+--?----?+	18.5	19.634	14	0.1421	-0.0008	0.0087	0.9236	++?-	0.1421	-0.0084	0.0021	7.624e-05	+------+--?----?+++?-	0.1099
11	99461751	CNTN5	rs2656193	31478	a	g	0.3774	0.0233	0.3537	0.4397	0.007	0.0017	5.13e-05	+-++-+++-++-+0+++	6.8	19.306	16	0.2531	0.0036	0.0065	0.5766	+++-	0.2531	0.0068	0.0017	5.347e-05	+-++-+++-++-+0++++++-	0.4475
11	65454833	none	rs2846861	31478	a	g	0.678	0.0086	0.6505	0.6931	-0.0074	0.0018	5.143e-05	----++----------+	0	10.67	16	0.8294	-0.0029	0.0067	0.6611	---+	0.8294	-0.0071	0.0018	6.156e-05	----++----------+---+	0.9048
4	86578083	none	rs12499206	31478	a	t	0.0149	0.0049	0.005	0.0296	-0.0291	0.0072	5.151e-05	----+----+------+	0	7.011	16	0.973	-0.0111	0.0266	0.6757	---+	0.973	-0.0278	0.007	6.669e-05	----+----+------+---+	0.9932
2	56788411	none	rs2216408	28294	a	g	0.9248	0.0075	0.9187	0.9497	-0.0138	0.0034	5.157e-05	---?--+++--------	21.5	21.651	15	0.1173	-0.0097	0.0114	0.3949	-+--	0.1173	-0.0135	0.0033	3.816e-05	---?--+++---------+--	0.2455
17	65770249	CEP112	rs1421032	31478	a	c	0.6458	0.018	0.615	0.6951	0.0074	0.0018	5.163e-05	+-++++++-++++-++-	5.2	18.996	16	0.2689	-0.0045	0.0064	0.4845	-++-	0.2689	0.0065	0.0018	0.0002367	+-++++++-++++-++--++-	0.09063
7	136046287	none	rs2129800	31477	t	c	0.2877	0.0107	0.2582	0.3086	0.0076	0.0019	5.188e-05	+-+++-++0+++++0++	0	8.021	16	0.9482	-0.0081	0.0069	0.2378	----	0.9482	0.0065	0.0018	0.0003592	+-+++-++0+++++0++----	0.8685
1	37741124	EPHA10	rs663428	31476	a	g	0.1919	0.0116	0.1557	0.228	-0.0089	0.0022	5.191e-05	-----+-+----+---+	0	13.076	16	0.6672	-0.0048	0.0083	0.5636	---+	0.6672	-0.0086	0.0021	5.232e-05	-----+-+----+---+---+	0.8457
2	178163223	none	rs12620314	31477	a	g	0.2767	0.0145	0.242	0.2985	0.0076	0.0019	5.217e-05	+-++--++++++++++-	0	10.694	16	0.8279	0.0055	0.0068	0.4217	--++	0.8279	0.0075	0.0018	4.075e-05	+-++--++++++++++---++	0.8921
2	136649111	none	rs1446100	31478	a	g	0.8137	0.0268	0.744	0.8749	-0.0091	0.0022	5.286e-05	---+----+---+----	0	7.885	16	0.9522	0.012	0.0083	0.1477	+-++	0.9522	-0.0076	0.0022	0.0004371	---+----+---+----+-++	0.7252
14	47421177	MDGA2	rs8016913	31478	a	t	0.3747	0.0244	0.317	0.4163	0.0072	0.0018	5.289e-05	+-++-+++--+--+-++	46.1	33.401	16	0.006537	-0.0002	0.0062	0.9771	---+	0.006537	0.0066	0.0017	0.0001189	+-++-+++--+--+-++---+	0.008223
4	86634593	PTPN13	rs12509049	31478	c	g	0.9858	0.0041	0.97	0.995	0.0294	0.0073	5.321e-05	++++-++++-++++++-	0	6.489	16	0.9819	0.0119	0.0267	0.6545	+++-	0.9819	0.0281	0.007	6.709e-05	++++-++++-++++++-+++-	0.9958
18	73972416	none	rs2702593	17826	a	g	0.9228	0.0061	0.912	0.9328	-0.0276	0.0068	5.331e-05	--+??---+-?----?+	-8.8	12.873	12	0.3783	-0.03	0.0279	0.2829	???-	0.3783	-0.0277	0.0067	3.105e-05	--+??---+-?----?+???-	0.4571
6	61046495	none	rs1123892	22492	a	g	0.8281	0.0165	0.785	0.8498	0.0106	0.0026	5.357e-05	+++++-++-+?+-+-?+	31.7	23.427	14	0.05367	-0.0113	0.0105	0.2782	+-?-	0.05367	0.0093	0.0026	0.0002856	+++++-++-+?+-+-?++-?-	0.02545
12	24419050	SOX5	rs16927597	31478	t	c	0.8401	0.0156	0.785	0.865	-0.0094	0.0023	5.374e-05	-------++--+-+---	16.3	21.51	16	0.1597	-0.0018	0.0089	0.8436	++--	0.1597	-0.0089	0.0023	8.366e-05	-------++--+-+---++--	0.2508
18	40322524	none	rs12968136	31478	a	g	0.044	0.0084	0.029	0.0703	-0.0175	0.0043	5.427e-05	---------+--+----	0	10.677	16	0.829	0.0149	0.0147	0.3104	+-+-	0.829	-0.0149	0.0042	0.0003558	---------+--+----+-+-	0.5123
20	43051163	PTPRT	rs3092568	31478	c	g	0.2159	0.0206	0.175	0.2437	-0.0083	0.0021	5.427e-05	-+--------------+	0	13.911	16	0.6053	-0.0057	0.0076	0.4507	++--	0.6053	-0.0082	0.002	4.579e-05	-+--------------+++--	0.6168
4	86611797	PTPN13	rs12509039	31478	a	g	0.9858	0.0041	0.9701	0.995	0.0292	0.0072	5.43e-05	++++-++++-++++++-	0	6.526	16	0.9813	0.0119	0.0266	0.6554	+++-	0.9813	0.028	0.007	6.842e-05	++++-++++-++++++-+++-	0.9957
14	47423759	MDGA2	rs13379367	31478	t	g	0.6278	0.0257	0.5839	0.684	-0.0071	0.0018	5.441e-05	-+--+---++-++-+--	45.9	33.299	16	0.006744	0.0001	0.0062	0.9926	+++-	0.006744	-0.0066	0.0017	0.000119	-+--+---++-++-+--+++-	0.008129
18	40329030	none	rs10048388	31478	a	g	0.0445	0.0079	0.029	0.0703	-0.0173	0.0043	5.449e-05	---------+--+----	0	11.117	16	0.8022	0.0151	0.0147	0.3026	+-+-	0.8022	-0.0148	0.0041	0.000355	---------+--+----+-+-	0.4804
20	62674583	SLCO4A1	rs6062400	28290	a	g	0.1424	0.0112	0.1128	0.1663	0.012	0.003	5.452e-05	+++?+++--+++--++-	-5	16.197	15	0.3691	-0.0157	0.0101	0.1193	+---	0.3691	0.0097	0.0029	0.0006419	+++?+++--+++--++-+---	0.1639
9	8254652	none	rs7872809	30477	t	c	0.3788	0.0208	0.3422	0.415	-0.0076	0.0019	5.462e-05	--+-----?---++---	53.6	36.647	15	0.001425	0.0036	0.0069	0.6003	--+-	0.001425	-0.0068	0.0018	0.0001956	--+-----?---++-----+-	0.001217
9	1129673	none	rs4237127	30576.9	a	g	0.7479	0.0771	0.3628	0.804	-0.0078	0.0019	5.508e-05	-+-----+0-+-----+	0	10.356	16	0.8474	0.0161	0.0072	0.02506	+-++	0.8474	-0.0062	0.0019	0.0009926	-+-----+0-+-----++-++	0.3325
6	33021995	none	rs9277002	31478	a	t	0.0497	0.0151	0.0198	0.0672	0.0176	0.0044	5.511e-05	+--+++++++++-+++-	9.5	19.885	16	0.2254	0.0283	0.0187	0.1305	+?+-	0.2254	0.0182	0.0043	2.1e-05	+--+++++++++-+++-+?+-	0.1165
8	79727183	none	rs12155921	28294	a	g	0.9782	0.0054	0.969	0.9863	0.0299	0.0074	5.525e-05	+-+?+++---+-++++-	0	13.694	15	0.5488	0.0213	0.0222	0.3357	++++	0.5488	0.029	0.007	3.901e-05	+-+?+++---+-++++-++++	0.6721
4	152213806	none	rs11727661	31475	a	c	0.1268	0.0131	0.115	0.1816	0.0103	0.0026	5.527e-05	+--++++--+++++++-	-0.5	17.909	16	0.3292	0.0119	0.0093	0.2019	++++	0.3292	0.0104	0.0025	2.588e-05	+--++++--+++++++-++++	0.3714
11	99472452	CNTN5	rs7945901	31477	t	c	0.7702	0.0158	0.7155	0.7805	-0.0081	0.002	5.532e-05	-+--+--++--------	0	10.707	16	0.8272	-0.0025	0.0074	0.7352	-+-+	0.8272	-0.0077	0.0019	7.389e-05	-+--+--++---------+-+	0.872
17	65770188	CEP112	rs7207587	31478	t	c	0.3541	0.0178	0.3055	0.385	-0.0074	0.0018	5.575e-05	-+------+----+--+	5.4	19.023	16	0.2675	0.0045	0.0064	0.4809	+--+	0.2675	-0.0065	0.0018	0.0002531	-+------+----+--++--+	0.09108
18	71585571	none	rs1539918	31478	t	c	0.3862	0.0157	0.3668	0.4381	-0.0071	0.0018	5.576e-05	----+--++----++-+	32.9	26.819	16	0.04354	-0.0052	0.0064	0.4156	++--	0.04354	-0.007	0.0017	4.551e-05	----+--++----++-+++--	0.07177
17	65771473	CEP112	rs2318868	31478	t	g	0.3534	0.0188	0.3016	0.385	-0.0074	0.0018	5.576e-05	-+------+----+--+	3.7	18.7	16	0.2846	0.0048	0.0064	0.4571	+--+	0.2846	-0.0065	0.0018	0.0002644	-+------+----+--++--+	0.09134
4	152214266	none	rs11727800	31478	t	c	0.1269	0.0131	0.115	0.1816	0.0103	0.0026	5.58e-05	+--++++--+++++++-	-4.8	17.183	16	0.3738	0.0119	0.0093	0.202	++++	0.3738	0.0104	0.0025	2.619e-05	+--++++--+++++++-++++	0.4089
11	99485975	CNTN5	rs10893403	31478	t	c	0.2264	0.0153	0.2121	0.2751	0.0082	0.002	5.62e-05	+-++-++--++++++++	0	9.21	16	0.9045	0.0018	0.0075	0.813	+-+-	0.9045	0.0077	0.002	8.436e-05	+-++-++--+++++++++-+-	0.9344
4	86684862	PTPN13	rs12498653	31478	a	g	0.0141	0.0043	0.004	0.03	-0.0306	0.0076	5.688e-05	----+----+------+	0	8.212	16	0.9423	-0.012	0.0267	0.6532	---+	0.9423	-0.0291	0.0073	7.317e-05	----+----+------+---+	0.9828
6	100391417	SIM1	rs3798515	31478	t	c	0.9257	0.0093	0.9173	0.9548	0.0131	0.0033	5.689e-05	+++++-++-++++-+-+	-4.3	17.261	16	0.3689	0.0131	0.0118	0.2664	+++-	0.3689	0.0131	0.0032	3.433e-05	+++++-++-++++-+-++++-	0.3695
16	77420581	ADAMTS18	rs12925727	31478	a	t	0.6959	0.0148	0.6804	0.73	0.0075	0.0019	5.703e-05	+++++++++-++++++-	0	9.641	16	0.8847	0.0108	0.0068	0.1101	++++	0.8847	0.0077	0.0018	1.838e-05	+++++++++-++++++-++++	0.9528
17	65771012	CEP112	rs6416948	31478	t	g	0.6458	0.0172	0.615	0.6909	0.0074	0.0018	5.713e-05	+-++++++-++++-++-	4.5	18.855	16	0.2762	-0.0047	0.0064	0.4604	-++-	0.2762	0.0065	0.0018	0.0002694	+-++++++-++++-++--++-	0.08886
17	65770595	CEP112	rs1421033	31478	a	c	0.6457	0.017	0.615	0.6897	0.0074	0.0018	5.727e-05	+-++++++-++++-++-	4.5	18.858	16	0.2761	-0.0047	0.0064	0.4603	-++-	0.2761	0.0065	0.0018	0.0002701	+-++++++-++++-++--++-	0.08885
18	71585448	none	rs1539919	31477	a	g	0.3853	0.0151	0.3668	0.4382	-0.0071	0.0018	5.74e-05	----+--++----++-+	32.4	26.624	16	0.04586	-0.0052	0.0064	0.4137	++--	0.04586	-0.0069	0.0017	4.664e-05	----+--++----++-+++--	0.07563
17	65771100	CEP112	rs6416949	31478	a	t	0.6458	0.0182	0.615	0.6943	0.0074	0.0018	5.758e-05	+-++++++-++++-++-	4	18.749	16	0.2819	-0.0048	0.0064	0.4535	-++-	0.2819	0.0064	0.0018	0.0002723	+-++++++-++++-++--++-	0.09109
18	54316533	POLI	rs664501	31478	a	c	0.6919	0.0089	0.6697	0.725	0.0075	0.0019	5.838e-05	+-++-++++++++-+++	0	12.134	16	0.7347	-0.0016	0.0067	0.8148	+--+	0.7347	0.0068	0.0018	0.0001472	+-++-++++++++-++++--+	0.3726
9	8255690	none	rs10733544	30477	a	g	0.6052	0.0212	0.577	0.645	0.0076	0.0019	5.85e-05	++-+++++?+++--+++	51.8	35.245	15	0.002269	-0.0044	0.0069	0.5213	++-+	0.002269	0.0067	0.0018	0.000236	++-+++++?+++--+++++-+	0.001771
3	37916811	CTDSPL	rs7624710	30086	c	g	0.9668	0.0053	0.9578	0.975	-0.0202	0.005	5.899e-05	+-+----+------?-+	0	10.618	15	0.7792	0.0208	0.0175	0.2357	+++-	0.7792	-0.0171	0.0048	0.0004317	+-+----+------?-++++-	0.6022
11	99458267	CNTN5	rs1504733	31478	a	g	0.3761	0.0234	0.3538	0.4398	0.007	0.0017	5.918e-05	+-++-+++-++-+0+++	0.9	18.166	16	0.3143	0.0027	0.0065	0.6788	+++-	0.3143	0.0067	0.0017	7.218e-05	+-++-+++-++-+0++++++-	0.5148
17	65770315	CEP112	rs7211481	31478	a	c	0.6559	0.018	0.623	0.7075	0.0074	0.0019	5.928e-05	+-++++++-++++-++-	-1.1	17.805	16	0.3355	-0.0055	0.0065	0.3945	-++-	0.3355	0.0064	0.0018	0.0003105	+-++++++-++++-++--++-	0.08371
2	239552403	none	rs1872622	31478	t	c	0.9568	0.0069	0.94	0.9708	0.0174	0.0043	6.009e-05	+++-+++++++++++++	0	11.105	16	0.803	0.0103	0.0158	0.5139	+-++	0.803	0.017	0.0042	5.287e-05	+++-++++++++++++++-++	0.8885
12	29625101	TMTC1	rs7955592	31033	a	g	0.2434	0.0147	0.194	0.2714	-0.0082	0.002	6.022e-05	-?-----+-+-------	0	11.638	15	0.7062	-0.0055	0.0077	0.4731	++--	0.7062	-0.008	0.002	5.47e-05	-?-----+-+-------++--	0.8842
17	65771617	CEP112	rs2318869	31478	c	g	0.6465	0.0184	0.615	0.6955	0.0073	0.0018	6.036e-05	+-++++++-++++-++-	1.8	18.331	16	0.3049	-0.0048	0.0064	0.4569	-++-	0.3049	0.0064	0.0018	0.0002827	+-++++++-++++-++--++-	0.09957
4	86590417	none	rs12505291	31478	t	c	0.0146	0.0041	0.005	0.0299	-0.029	0.0072	6.078e-05	----+----+------+	0	6.729	16	0.9781	-0.0117	0.0266	0.6592	---+	0.9781	-0.0277	0.007	7.646e-05	----+----+------+---+	0.9948
20	43049787	PTPRT	rs1106978	31478	a	g	0.2141	0.0184	0.175	0.2378	-0.0083	0.0021	6.079e-05	-+--------------+	0	13.855	16	0.6095	-0.0055	0.0076	0.4665	++--	0.6095	-0.0081	0.002	5.263e-05	-+--------------+++--	0.6207
17	65773106	CEP112	rs9894298	31478	a	g	0.3527	0.0197	0.297	0.385	-0.0073	0.0018	6.102e-05	-+------+----+--+	1.7	18.314	16	0.3059	0.0049	0.0064	0.4449	+--+	0.3059	-0.0064	0.0018	0.000293	-+------+----+--++--+	0.09725
17	65772170	CEP112	rs7218844	31478	a	g	0.353	0.0189	0.301	0.385	-0.0073	0.0018	6.138e-05	-+------+----+--+	1.5	18.266	16	0.3085	0.0048	0.0064	0.4542	+--+	0.3085	-0.0064	0.0018	0.000288	-+------+----+--++--+	0.1004
17	65773005	CEP112	rs4791132	31478	t	c	0.647	0.019	0.615	0.6992	0.0073	0.0018	6.144e-05	+-++++++-++++-++-	1.5	18.271	16	0.3083	-0.0048	0.0064	0.4541	-++-	0.3083	0.0064	0.0018	0.0002883	+-++++++-++++-++--++-	0.1002
18	54349494	STARD6	rs1657890	31478	t	c	0.6791	0.0141	0.6538	0.709	0.0072	0.0018	6.156e-05	+-++-++++++++-+++	0	13.41	16	0.6425	-0.0044	0.0066	0.5043	+--+	0.6425	0.0064	0.0017	0.000238	+-++-++++++++-++++--+	0.1598
17	65773440	CEP112	rs9901885	31478	t	c	0.6473	0.0198	0.615	0.7035	0.0073	0.0018	6.163e-05	+-++++++-++++-++-	1.7	18.303	16	0.3065	-0.0049	0.0064	0.4447	-++-	0.3065	0.0064	0.0018	0.0002956	+-++++++-++++-++--++-	0.09747
11	99490578	CNTN5	rs7937401	31478	t	g	0.2293	0.0166	0.2134	0.2849	0.008	0.002	6.165e-05	+-++-++--++++++++	0	10.228	16	0.8545	0.0024	0.0074	0.7506	+-+-	0.8545	0.0076	0.0019	8.396e-05	+-++-++--+++++++++-+-	0.8945
16	77420294	ADAMTS18	rs12934271	31477	a	g	0.6954	0.015	0.6803	0.73	0.0075	0.0019	6.166e-05	+++++++++-++++++-	0	9.918	16	0.8709	0.0108	0.0068	0.1112	++++	0.8709	0.0077	0.0018	2e-05	+++++++++-++++++-++++	0.9459
17	65774379	CEP112	rs7215462	31478	t	c	0.6471	0.0191	0.615	0.7	0.0073	0.0018	6.187e-05	+-++++++-++++-++-	1.5	18.268	16	0.3085	-0.0049	0.0064	0.4415	-++-	0.3085	0.0064	0.0018	0.000298	+-++++++-++++-++--++-	0.09753
20	62011418	TAF4	rs6061952	31478	a	g	0.9853	0.0051	0.977	0.995	0.0296	0.0074	6.188e-05	+-+++++-++++--+++	11	20.219	16	0.2105	0.0322	0.0407	0.4289	--?+	0.2105	0.0296	0.0073	4.999e-05	+-+++++-++++--+++--?+	0.2458
20	43047501	PTPRT	rs2425567	31478	c	g	0.2114	0.0166	0.175	0.2312	-0.0083	0.0021	6.22e-05	-+--------------+	0	13.406	16	0.6429	-0.0052	0.0076	0.4926	++--	0.6429	-0.0081	0.002	5.64e-05	-+--------------+++--	0.6533
11	115292944	CADM1	rs4938195	31478	a	g	0.8727	0.0128	0.8189	0.8884	-0.0103	0.0026	6.241e-05	-------------+---	0	12.619	16	0.7004	0.0005	0.0094	0.9534	++-+	0.7004	-0.0096	0.0025	0.0001248	-------------+---++-+	0.7985
17	65774888	CEP112	rs9972942	31478	a	g	0.3528	0.019	0.3	0.385	-0.0073	0.0018	6.259e-05	-+------+----+--+	1.5	18.274	16	0.3081	0.0049	0.0064	0.4414	+--+	0.3081	-0.0064	0.0018	0.0003006	-+------+----+--++--+	0.09747
2	74085952	TET3	rs828872	31478	t	c	0.0959	0.0088	0.0819	0.113	0.0118	0.003	6.263e-05	+++++++-+-+-++-++	1.1	18.199	16	0.3124	0.0029	0.0107	0.787	+--+	0.3124	0.0112	0.0029	9.108e-05	+++++++-+-+-++-+++--+	0.09049
2	159213244	TANC1	rs13022357	28294	a	g	0.1085	0.0151	0.0708	0.15	0.0119	0.003	6.353e-05	+++?++++-++-+-+++	0	11.175	15	0.7401	-0.0018	0.0101	0.8615	++--	0.7401	0.0107	0.0029	0.0001655	+++?++++-++-+-+++++--	0.6299
16	77419427	ADAMTS18	rs2162954	31478	a	t	0.6954	0.0149	0.6801	0.73	0.0074	0.0019	6.361e-05	+++++++++-++++++-	0	9.876	16	0.873	0.0108	0.0068	0.1112	++++	0.873	0.0077	0.0018	2.067e-05	+++++++++-++++++-++++	0.9469
11	13414235	BTBD10	rs10766081	23394	a	g	0.8518	0.0122	0.8337	0.8877	0.0119	0.003	6.389e-05	+-++++++-+?++++?+	0	6.426	14	0.9546	-0.0022	0.0107	0.8339	-+?+	0.9546	0.0108	0.0029	0.0001576	+-++++++-+?++++?+-+?+	0.6815
6	27263370	none	rs6938200	30131.6	a	g	0.8055	0.0231	0.7609	0.8609	-0.0087	0.0022	6.424e-05	-?-------+------+	5.9	18.062	15	0.2594	-0.0011	0.0079	0.8937	+---	0.2594	-0.0082	0.0021	0.0001048	-?-------+------++---	0.3617
10	83693024	none	rs2065594	31478	t	c	0.5912	0.0118	0.5761	0.6113	-0.0069	0.0017	6.433e-05	--+-----------+-+	0	12.687	16	0.6955	-0.007	0.0061	0.2551	++--	0.6955	-0.0069	0.0017	3.623e-05	--+-----------+-+++--	0.8233
6	33056721	none	rs367645	30574.9	a	g	0.0404	0.0105	0.0289	0.067	0.0187	0.0047	6.455e-05	+++-++++++++-++++	7.7	19.497	16	0.2437	0.0342	0.0194	0.0776	+?++	0.2437	0.0197	0.0046	1.697e-05	+++-++++++++-+++++?++	0.1839
6	27079476	none	rs6904071	30577	a	g	0.1639	0.0194	0.1179	0.204	0.0092	0.0023	6.459e-05	+-+++-+++-++++++-	15	21.169	16	0.1721	-0.0022	0.0083	0.7883	--+-	0.1721	0.0084	0.0022	0.0001621	+-+++-+++-++++++---+-	0.2462
16	77419391	ADAMTS18	rs2840102	31478	a	c	0.6954	0.0149	0.68	0.73	0.0074	0.0019	6.485e-05	+++++++++-++++++-	0	9.842	16	0.8747	0.0108	0.0068	0.1112	++++	0.8747	0.0076	0.0018	2.108e-05	+++++++++-++++++-++++	0.9477
11	115293546	CADM1	rs4938196	31478	c	g	0.873	0.0123	0.8195	0.8884	-0.0103	0.0026	6.55e-05	-------------+---	0	12.64	16	0.6989	0.0007	0.0094	0.9388	++-+	0.6989	-0.0095	0.0025	0.0001328	-------------+---++-+	0.7952
4	165706843	none	rs17688831	28294	t	c	0.8883	0.0096	0.8641	0.9032	0.0122	0.0031	6.554e-05	+--?+++--++-+--++	-12.9	15.057	15	0.4473	0.0112	0.0104	0.2834	-++-	0.4473	0.0121	0.0029	3.774e-05	+--?+++--++-+--++-++-	0.4662
9	1169787	none	rs2152849	30477	c	g	0.7241	0.0245	0.6765	0.76	-0.0078	0.002	6.563e-05	-+-----+?-+-----+	0	14.681	15	0.4746	0.0113	0.0071	0.1147	+-++	0.4746	-0.0065	0.0019	0.0006482	-+-----+?-+-----++-++	0.2632
16	77420338	ADAMTS18	rs12934409	31478	a	g	0.6952	0.0153	0.68	0.73	0.0074	0.0019	6.571e-05	+++++++++-++++++-	0	9.927	16	0.8704	0.0108	0.0068	0.11	++++	0.8704	0.0077	0.0018	2.121e-05	+++++++++-++++++-++++	0.9453
6	148675308	none	rs6570881	31478	a	g	0.6923	0.0087	0.675	0.718	0.0073	0.0018	6.606e-05	-+-++-++++++++++-	0	12.147	16	0.7338	0.0039	0.0066	0.5552	-++-	0.7338	0.007	0.0018	6.505e-05	-+-++-++++++++++--++-	0.8274
15	79573874	none	rs1765259	31475	t	g	0.8393	0.0151	0.785	0.861	-0.0093	0.0023	6.631e-05	---------+--++---	0	14.276	16	0.5782	0.006	0.0083	0.4686	++++	0.5782	-0.0082	0.0023	0.0002878	---------+--++---++++	0.5768
12	24415434	SOX5	rs10771087	31478	a	g	0.8479	0.016	0.801	0.872	-0.0097	0.0024	6.666e-05	-----+-++--+-+---	9	19.781	16	0.2303	-0.0024	0.0094	0.7946	++--	0.2303	-0.0092	0.0024	9.48e-05	-----+-++--+-+---++--	0.3248
17	65768497	CEP112	rs8076925	31478	a	c	0.6449	0.0165	0.615	0.683	0.0073	0.0018	6.666e-05	+-++-+++-++++-++-	7.4	19.433	16	0.2469	-0.0044	0.0064	0.4899	-++-	0.2469	0.0064	0.0018	0.00029	+-++-+++-++++-++--++-	0.0855
11	115291655	CADM1	rs11215467	31478	t	c	0.8723	0.0131	0.8188	0.8884	-0.0103	0.0026	6.672e-05	-------------+---	0	12.694	16	0.695	0.0004	0.0094	0.962	++-+	0.695	-0.0095	0.0025	0.0001317	-------------+---++-+	0.78
6	100386186	SIM1	rs2295595	31478	c	g	0.0744	0.0093	0.0452	0.0825	-0.013	0.0033	6.682e-05	-----+--+----+-+-	-3.8	17.338	16	0.3641	-0.0134	0.0117	0.255	---+	0.3641	-0.013	0.0032	3.902e-05	-----+--+----+-+----+	0.3572
17	65777003	CEP112	rs11870607	23394	a	g	0.3351	0.0171	0.3112	0.374	-0.0085	0.0021	6.683e-05	-+------+-?----?+	10.3	17.832	14	0.2145	0.0162	0.0082	0.04854	+-?+	0.2145	-0.0069	0.0021	0.0008579	-+------+-?----?++-?+	0.02436
9	1130579	none	rs4741117	30576.9	a	g	0.7485	0.0768	0.3653	0.806	-0.0077	0.0019	6.711e-05	-+-----+0-+-----+	0	9.97	16	0.8682	0.0164	0.0072	0.02255	+-++	0.8682	-0.0061	0.0019	0.001223	-+-----+0-+-----++-++	0.3445
13	34594470	LINC00457	rs7325039	31478	a	g	0.0634	0.0117	0.0439	0.097	-0.0144	0.0036	6.714e-05	-++-----++--++--+	-11.5	16.141	16	0.4432	0.0167	0.0146	0.253	--++	0.4432	-0.0126	0.0035	0.0003586	-++-----++--++--+--++	0.1899
8	89154199	none	rs4961116	31470	t	c	0.0855	0.0061	0.0698	0.0913	0.0122	0.0031	6.716e-05	++-++-++--++++++-	0	15.846	16	0.4638	-0.022	0.0111	0.04802	---+	0.4638	0.0098	0.003	0.0009738	++-++-++--++++++----+	0.09387
17	65768771	CEP112	rs7220733	31478	a	t	0.6549	0.0171	0.623	0.7012	0.0074	0.0019	6.722e-05	+-++++++-++++-++-	-0.9	17.837	16	0.3336	-0.0052	0.0065	0.4224	-++-	0.3336	0.0064	0.0018	0.0003273	+-++++++-++++-++--++-	0.08888
6	27218012	none	rs3800307	31478	a	t	0.1862	0.0236	0.1324	0.2255	0.0088	0.0022	6.733e-05	+-+++++++-++++++-	15.1	21.19	16	0.1713	0.0017	0.008	0.8269	--++	0.1713	0.0083	0.0021	0.0001006	+-+++++++-++++++---++	0.314
15	79573663	none	rs1765258	31478	a	t	0.8404	0.0151	0.785	0.861	-0.0093	0.0023	6.742e-05	---------+--++---	0	14.163	16	0.5865	0.0061	0.0084	0.4666	++++	0.5865	-0.0082	0.0023	0.0002922	---------+--++---++++	0.5852
9	1137877	none	rs7031945	30477	c	g	0.347	0.0144	0.3236	0.403	0.0071	0.0018	6.849e-05	+-+++++-?+++++++-	0	12.527	15	0.6388	-0.0083	0.0065	0.2022	----	0.6388	0.006	0.0017	0.0004952	+-+++++-?+++++++-----	0.5177
14	47446635	MDGA2	rs10149027	31478	a	g	0.6256	0.0232	0.584	0.682	-0.007	0.0018	6.881e-05	-+------++-++-+--	45.1	32.765	16	0.007938	-0.0004	0.0062	0.9508	+++-	0.007938	-0.0065	0.0017	0.0001362	-+------++-++-+--+++-	0.01008
6	25767208	SLC17A4	rs6902211	31478	a	g	0.9126	0.0127	0.8891	0.9428	-0.0124	0.0031	6.887e-05	-------+------+-+	0	12.045	16	0.7409	-0.0035	0.0105	0.7415	++-+	0.7409	-0.0117	0.003	9.687e-05	-------+------+-+++-+	0.5486
6	25763963	SLC17A4	rs4712969	31478	a	g	0.0873	0.0126	0.0573	0.1109	0.0124	0.0031	6.926e-05	+++++++-++++++-+-	0	12.059	16	0.7399	0.0035	0.0105	0.7395	--+-	0.7399	0.0117	0.003	9.718e-05	+++++++-++++++-+---+-	0.5484
6	25760980	SLC17A4	rs4236040	31478	t	c	0.0874	0.0126	0.0573	0.1109	0.0124	0.0031	6.952e-05	+++++++-++++++-+-	0	12.002	16	0.7438	0.0035	0.0105	0.7373	--+-	0.7438	0.0117	0.003	9.705e-05	+++++++-++++++-+---+-	0.5529
17	65774502	CEP112	rs6504357	31478	a	g	0.3525	0.0189	0.3	0.385	-0.0073	0.0018	6.959e-05	-+------+----+--+	2	18.363	16	0.3031	0.0049	0.0064	0.4414	+--+	0.3031	-0.0063	0.0018	0.0003308	-+------+----+--++--+	0.096
6	25768795	SLC17A4	rs1892250	30576.7	t	c	0.0875	0.0129	0.0572	0.1109	0.0123	0.0031	6.969e-05	+++++++-++++++-+-	0	12.035	16	0.7416	0.0035	0.0105	0.7387	--+-	0.7416	0.0116	0.003	9.713e-05	+++++++-++++++-+---+-	0.5549
6	30768763	none	rs11964596	30571.2	a	g	0.0228	0.004	0.0116	0.0339	0.0224	0.0056	6.998e-05	-+-+++---+++++++-	0	13.237	16	0.6554	0.0127	0.0243	0.6014	+?+-	0.6554	0.0219	0.0055	7.252e-05	-+-+++---+++++++-+?+-	0.5293
16	24304242	CACNG3	rs7200040	31478	a	g	0.325	0.0184	0.2875	0.3487	-0.0073	0.0018	7.026e-05	-+-----------+--+	0	13.429	16	0.6412	-0.0006	0.0067	0.9263	+--+	0.6412	-0.0068	0.0018	0.0001248	-+-----------+--++--+	0.3599
11	65453277	none	rs1784859	31478	t	c	0.3221	0.009	0.3055	0.3497	0.0072	0.0018	7.027e-05	++++--++++++++++-	0	10.16	16	0.8581	0.0029	0.0067	0.6637	+++-	0.8581	0.0069	0.0018	8.354e-05	++++--++++++++++-+++-	0.9234
4	1157975	none	rs2127910	31478	t	c	0.0277	0.0039	0.0177	0.0347	0.0212	0.0053	7.079e-05	+++-+++-+++++++++	0	10.383	16	0.8459	0.0091	0.0171	0.592	+-++	0.8459	0.0202	0.0051	7.824e-05	+++-+++-++++++++++-++	0.8172
16	77418312	ADAMTS18	rs10781985	31478	a	g	0.6958	0.0154	0.6795	0.73	0.0074	0.0019	7.084e-05	+++++++++-++++++-	0	9.722	16	0.8807	0.0107	0.0068	0.1146	++++	0.8807	0.0076	0.0018	2.349e-05	+++++++++-++++++-++++	0.9509
17	65768526	CEP112	rs8077164	31478	t	c	0.3547	0.0174	0.3103	0.385	-0.0073	0.0018	7.089e-05	-+--+---+----+--+	7.4	19.436	16	0.2467	0.0045	0.0064	0.4842	+--+	0.2467	-0.0064	0.0018	0.0003111	-+--+---+----+--++--+	0.08466
10	3820321	none	rs11252121	25550	a	g	0.131	0.0143	0.079	0.1626	-0.0121	0.0031	7.118e-05	--+??---+-----+-?	4.2	15.657	13	0.2681	-0.0069	0.0094	0.4616	+--+	0.2681	-0.0116	0.0029	6.619e-05	--+??---+-----+-?+--+	0.1404
6	27091663	none	rs926300	31478	a	t	0.8362	0.0195	0.796	0.8821	-0.0091	0.0023	7.12e-05	-+---+----------+	16.1	21.443	16	0.1621	0.002	0.0083	0.8077	++-+	0.1621	-0.0084	0.0022	0.0001722	-+---+----------+++-+	0.2377
4	152214719	none	rs11732361	31478	t	c	0.8727	0.013	0.8184	0.885	-0.0102	0.0026	7.152e-05	-++----++----0--+	-1.8	17.69	16	0.3424	-0.0119	0.0093	0.2035	----	0.3424	-0.0103	0.0025	3.379e-05	-++----++----0--+----	0.3779
4	86314653	MAPK10	rs12500132	28294	a	g	0.9843	0.0039	0.971	0.994	0.0306	0.0077	7.161e-05	+++?++++++++++-+-	0	13.519	15	0.5622	0.0227	0.028	0.4167	+-+-	0.5622	0.03	0.0075	5.734e-05	+++?++++++++++-+-+-+-	0.6244
16	77418329	ADAMTS18	rs10781986	31478	a	g	0.3041	0.0152	0.27	0.3203	-0.0074	0.0019	7.18e-05	---------+------+	0	9.708	16	0.8814	-0.0106	0.0068	0.116	----	0.8814	-0.0076	0.0018	2.397e-05	---------+------+----	0.9514
20	43048830	PTPRT	rs2425568	31478	c	g	0.1818	0.0084	0.159	0.1901	-0.0088	0.0022	7.201e-05	-+-------------++	0	12.182	16	0.7313	-0.0041	0.0079	0.6027	++--	0.7313	-0.0084	0.0021	7.855e-05	-+-------------++++--	0.6947
16	77417585	ADAMTS18	rs11149989	31478	a	g	0.3039	0.0145	0.27	0.3205	-0.0073	0.0018	7.216e-05	---------+------+	0	9.378	16	0.897	-0.0103	0.0067	0.1256	----	0.897	-0.0075	0.0018	2.528e-05	---------+------+----	0.9603
6	37551595	none	rs4714075	31478	t	c	0.2361	0.0141	0.2192	0.2724	0.0086	0.0022	7.3e-05	+-++-++++-+++++++	5.6	19.064	16	0.2654	-0.0003	0.0076	0.9696	--++	0.2654	0.0079	0.0021	0.0001509	+-++-++++-+++++++--++	0.3009
6	139538404	none	rs12665242	31478	a	g	0.8672	0.0099	0.8458	0.8789	-0.01	0.0025	7.305e-05	--+-++-----------	0	15.397	16	0.4958	-0.0026	0.0089	0.7749	+++-	0.4958	-0.0095	0.0024	0.0001095	--+-++-----------+++-	0.2384
6	61078023	none	rs3904827	31478	a	g	0.1578	0.016	0.1402	0.2045	-0.0094	0.0024	7.31e-05	-----+--+---+-+--	26.5	24.494	16	0.07925	0.0007	0.0086	0.9367	-+-+	0.07925	-0.0087	0.0023	0.0001562	-----+--+---+-+---+-+	0.05393
17	65773265	CEP112	rs9899781	31478	t	c	0.3531	0.0199	0.2969	0.385	-0.0073	0.0018	7.322e-05	-+------+----+--+	2.1	18.385	16	0.3018	0.0048	0.0064	0.448	+--+	0.3018	-0.0063	0.0018	0.0003418	-+------+----+--++--+	0.09658
8	55911998	LYN	rs1546519	31478	a	g	0.7203	0.0204	0.683	0.7544	0.0075	0.0019	7.368e-05	++-+++++++++++-++	4.6	18.86	16	0.276	-0.0093	0.0069	0.1787	----	0.276	0.0063	0.0018	0.0005601	++-+++++++++++-++----	0.2016
17	65758741	CEP112	rs9907969	31478	a	c	0.3543	0.0159	0.3178	0.385	-0.0073	0.0018	7.38e-05	-+--+---+----+--+	6.7	19.292	16	0.2538	0.0045	0.0064	0.4876	+--+	0.2538	-0.0064	0.0018	0.0003186	-+--+---+----+--++--+	0.08726
6	84796503	none	rs215930	31478	t	g	0.397	0.0172	0.3647	0.42	0.0071	0.0018	7.513e-05	+--+-++--++++++++	0	11.836	16	0.7552	-0.0014	0.0065	0.8237	++--	0.7552	0.0065	0.0017	0.0001825	+--+-++--++++++++++--	0.6405
10	33584432	none	rs1902408	31478	t	c	0.1222	0.0127	0.103	0.1551	0.0106	0.0027	7.564e-05	+-+++++-+-++++-++	19.8	22.444	16	0.1294	-0.006	0.0098	0.5434	++--	0.1294	0.0094	0.0026	0.0002747	+-+++++-+-++++-++++--	0.05208
2	45389961	SRBD1	rs6719211	31466	t	g	0.835	0.0192	0.769	0.8746	-0.0092	0.0023	7.612e-05	-----+-+--------+	0	9.063	16	0.9108	0.0089	0.0087	0.3046	-+-+	0.9108	-0.008	0.0023	0.0003924	-----+-+--------+-+-+	0.7081
7	97343626	none	rs13247934	31478	t	g	0.694	0.0132	0.65	0.7447	-0.0078	0.002	7.618e-05	-++-------------+	0	15.071	16	0.5194	0.0121	0.007	0.08277	+-++	0.5194	-0.0063	0.0019	0.0008729	-++-------------++-++	0.2364
6	27123645	none	rs6913660	30576.9	a	c	0.1629	0.0191	0.1179	0.2038	0.009	0.0023	7.624e-05	+-+++-++++++++++-	16.1	21.465	16	0.1613	-0.0013	0.0083	0.8785	--+-	0.1613	0.0083	0.0022	0.0001644	+-+++-++++++++++---+-	0.2492
2	56595278	none	rs2042123	31476	a	g	0.128	0.0104	0.105	0.1501	0.0099	0.0025	7.628e-05	++--+++-+++++++++	-9.1	16.492	16	0.4192	0.0088	0.0093	0.3432	+-++	0.4192	0.0098	0.0024	4.734e-05	++--+++-++++++++++-++	0.5387
10	29600319	SVIL	rs2488683	31478	c	g	0.5126	0.0121	0.4973	0.5497	-0.0067	0.0017	7.731e-05	-++-----+-----0-+	16.1	21.451	16	0.1618	-0.0023	0.0062	0.7092	+---	0.1618	-0.0064	0.0016	9.902e-05	-++-----+-----0-++---	0.2196
4	57554949	none	rs4865243	31478	t	c	0.4513	0.0126	0.4148	0.4709	-0.0067	0.0017	7.783e-05	----+-------+----	0	12.057	16	0.7401	0	0.0063	0.9966	+---	0.7401	-0.0063	0.0016	0.0001446	----+-------+----+---	0.3703
2	56594747	none	rs12713318	31472	t	g	0.1287	0.0103	0.105	0.1501	0.0099	0.0025	7.842e-05	++--+++-+++++++++	-11.6	16.125	16	0.4443	0.0085	0.0093	0.3604	+-++	0.4443	0.0098	0.0024	5.052e-05	++--+++-++++++++++-++	0.5658
10	29600772	SVIL	rs2505899	31478	t	c	0.5128	0.0122	0.4973	0.55	-0.0066	0.0017	7.846e-05	-++-----+-----0-+	16.6	21.586	16	0.1571	-0.002	0.0062	0.7453	+---	0.1571	-0.0063	0.0016	0.0001056	-++-----+-----0-++---	0.2001
9	1142406	none	rs953168	30477	t	c	0.3482	0.0153	0.3194	0.405	0.007	0.0018	7.862e-05	+-+++++-?+++++++-	0	12.257	15	0.6595	-0.008	0.0065	0.2142	----	0.6595	0.006	0.0017	0.00054	+-+++++-?+++++++-----	0.542
6	61233069	none	rs2879965	28312	t	g	0.1774	0.0107	0.1606	0.2036	-0.0095	0.0024	7.906e-05	?-------+---+-+--	20.7	21.431	15	0.1236	0.0033	0.0083	0.6855	-+-+	0.1236	-0.0085	0.0023	0.0002492	?-------+---+-+---+-+	0.09128
6	148678317	none	rs9498113	31478	a	g	0.3091	0.0102	0.282	0.325	-0.0072	0.0018	7.908e-05	+-+--+----------+	0	12.127	16	0.7352	-0.0038	0.0067	0.5697	+--+	0.7352	-0.007	0.0018	7.896e-05	+-+--+----------++--+	0.8363
10	29600760	SVIL	rs2505898	31478	t	c	0.5128	0.0122	0.4973	0.55	-0.0066	0.0017	7.911e-05	-++-----+-----0-+	16.6	21.585	16	0.1571	-0.0021	0.0062	0.7363	+---	0.1571	-0.0063	0.0016	0.0001051	-++-----+-----0-++---	0.2034
15	79575436	none	rs1685158	31478	a	c	0.8488	0.0179	0.7851	0.868	-0.0097	0.0025	7.935e-05	------------+++--	0	13.219	16	0.6567	0.0058	0.0087	0.5062	++++	0.6567	-0.0085	0.0024	0.0003175	------------+++--++++	0.7025
19	8376972	RAB11B-AS1	rs1808536	31478	a	g	0.1947	0.0143	0.1794	0.2375	-0.0091	0.0023	7.944e-05	-------++---+---+	0	9.99	16	0.8671	-0.0036	0.0085	0.668	+-+-	0.8671	-0.0087	0.0022	9.533e-05	-------++---+---++-+-	0.3903
15	79563950	none	rs1932997	31478	t	c	0.836	0.0154	0.7795	0.852	-0.0092	0.0023	7.998e-05	-----+------+00-+	0	12.846	16	0.684	0.0035	0.0085	0.6791	++-+	0.684	-0.0083	0.0023	0.0002425	-----+------+00-+++-+	0.7387
11	99490759	CNTN5	rs12290503	31478	a	g	0.7672	0.0177	0.7053	0.778	-0.0079	0.002	8.041e-05	-+--+--++--------	0	10.506	16	0.8389	-0.0026	0.0073	0.7241	-+-+	0.8389	-0.0075	0.0019	0.0001051	-+--+--++---------+-+	0.8492
16	77416155	ADAMTS18	rs8059111	31478	a	g	0.3049	0.0137	0.27	0.3207	-0.0072	0.0018	8.076e-05	---------+------+	0	9.726	16	0.8805	-0.01	0.0067	0.1387	-+--	0.8805	-0.0074	0.0018	3.019e-05	---------+------+-+--	0.9503
11	13436410	BTBD10	rs10832034	23394	a	g	0.1439	0.0105	0.121	0.1624	-0.0115	0.0029	8.126e-05	--------+-?----?-	0	4.564	14	0.991	0.0032	0.0107	0.7647	+-?-	0.991	-0.0105	0.0028	0.0002117	--------+-?----?-+-?-	0.7987
10	21155970	NEBL	rs7090013	31478	a	g	0.8342	0.0091	0.8023	0.879	0.009	0.0023	8.152e-05	+++++++++-+-+++++	0	14.779	16	0.5409	-0.0139	0.0083	0.094	-+--	0.5409	0.0073	0.0022	0.0008867	+++++++++-+-+++++-+--	0.2051
4	56303902	KIAA1211	rs7663516	17020	t	g	0.0752	0.015	0.0452	0.094	0.0246	0.0063	8.167e-05	+?+??++--+?++++??	0	9.119	10	0.5209	0.0068	0.0141	0.6301	++?+	0.5209	0.0217	0.0057	0.0001489	+?+??++--+?++++??++?+	0.6535
10	84764709	none	rs1577269	31478	a	g	0.6167	0.0225	0.583	0.6961	-0.0067	0.0017	8.223e-05	-------+--------+	-9.3	16.476	16	0.4203	-0.0007	0.0065	0.9196	-++-	0.4203	-0.0064	0.0017	0.0001257	-------+--------+-++-	0.4959
4	152214930	none	rs4309822	31478	a	g	0.8727	0.0129	0.8184	0.884	-0.0101	0.0026	8.385e-05	-++----++----0--+	-2.3	17.594	16	0.3482	-0.0117	0.0094	0.2126	----	0.3482	-0.0102	0.0025	4.086e-05	-++----++----0--+----	0.3816
6	148682274	none	rs4897035	31478	t	c	0.6877	0.0098	0.6711	0.716	0.0072	0.0018	8.416e-05	-+-++-++++++++++-	0	12.119	16	0.7357	0.0038	0.0067	0.5642	-++-	0.7357	0.007	0.0018	8.254e-05	-+-++-++++++++++--++-	0.8377
15	79574004	none	rs1765260	31478	a	g	0.1591	0.0152	0.139	0.215	0.0092	0.0023	8.421e-05	+++++++++-++--0++	0	14.433	16	0.5665	-0.006	0.0084	0.4737	----	0.5665	0.0081	0.0023	0.0003514	+++++++++-++--0++----	0.5722
11	113970280	none	rs10789980	31478	a	g	0.495	0.0129	0.454	0.5281	-0.0068	0.0017	8.428e-05	-+---+-----------	0	15.077	16	0.519	0.0014	0.0061	0.8212	+++-	0.519	-0.0062	0.0017	0.0002147	-+---+-----------+++-	0.5964
2	182290836	PDE1A	rs16823010	31478	a	g	0.8026	0.0141	0.7768	0.833	0.0085	0.0022	8.464e-05	++++-+++-+++-++-+	0	13.962	16	0.6015	-0.0042	0.0079	0.5999	-+--	0.6015	0.0076	0.0021	0.0002754	++++-+++-+++-++-+-+--	0.5629
10	83679552	none	rs17317447	31478	a	g	0.588	0.0133	0.5722	0.6119	-0.0068	0.0017	8.479e-05	--+-----------+-+	0	10.38	16	0.846	-0.0068	0.0062	0.27	++--	0.846	-0.0067	0.0017	4.983e-05	--+-----------+-+++--	0.8811
18	40347889	none	rs12963704	28294	t	c	0.9538	0.0074	0.9296	0.97	0.0172	0.0044	8.487e-05	-+-?++++++++-++++	0	12.118	15	0.6701	-0.0145	0.0143	0.3108	-+-+	0.6701	0.0145	0.0042	0.0005636	-+-?++++++++-++++-+-+	0.3701
15	91682329	none	rs7402242	31478	a	g	0.7049	0.0136	0.6652	0.739	-0.0074	0.0019	8.506e-05	-------------+--+	0	9.477	16	0.8925	-0.0097	0.0069	0.1603	----	0.8925	-0.0076	0.0018	3.438e-05	-------------+--+----	0.9613
10	29601337	SVIL	rs2505900	31478	a	c	0.4871	0.0123	0.45	0.5028	0.0066	0.0017	8.521e-05	+--+++++-+++++0+-	16.4	21.523	16	0.1593	0.0019	0.0062	0.7563	-+++	0.1593	0.0063	0.0016	0.0001162	+--+++++-+++++0+--+++	0.1991
11	88103615	none	rs490589	28293	a	g	0.3856	0.0155	0.367	0.4357	0.0073	0.0019	8.545e-05	+++?-++--++++++++	0	8.927	15	0.8813	-0.0099	0.0063	0.1198	----	0.8813	0.006	0.0018	0.0008865	+++?-++--++++++++----	0.485
12	24410942	SOX5	rs11534741	31478	c	g	0.1359	0.0137	0.1023	0.167	0.0104	0.0027	8.572e-05	+++++-+--++++-+++	4.6	18.868	16	0.2756	0.0031	0.0103	0.7613	--++	0.2756	0.01	0.0026	0.0001161	+++++-+--++++-+++--++	0.4013
11	113967396	none	rs7104827	31478	a	t	0.4947	0.0131	0.454	0.5281	-0.0068	0.0017	8.62e-05	-+---+-----------	0	15.097	16	0.5175	0.0015	0.0061	0.8022	+++-	0.5175	-0.0062	0.0017	0.0002255	-+---+-----------+++-	0.5884
2	208567193	none	rs10210510	28294	c	g	0.0233	0.0049	0.0108	0.0296	-0.0255	0.0065	8.695e-05	-+-?---++--++----	-0.6	16.894	15	0.3252	-0.0784	0.0227	0.0005443	+---	0.3252	-0.0295	0.0063	2.39e-06	-+-?---++--++----+---	0.08307
16	77418343	ADAMTS18	rs10781987	23394	t	c	0.2986	0.0146	0.27	0.3203	-0.0086	0.0022	8.715e-05	---------+?----?+	0	8.422	14	0.8662	-0.0091	0.0084	0.2753	--?-	0.8662	-0.0086	0.0021	5.129e-05	---------+?----?+--?-	0.9337
4	186873020	none	rs13124558	31478	t	c	0.7049	0.0116	0.6805	0.752	-0.0073	0.0019	8.786e-05	-+-----+-+-----++	20	22.498	16	0.1278	0.0048	0.0068	0.4772	+++-	0.1278	-0.0064	0.0018	0.0003586	-+-----+-+-----+++++-	0.164
6	148649777	none	rs3885665	31478	t	c	0.3011	0.0082	0.279	0.3173	-0.0072	0.0018	8.796e-05	+++--+----------+	0	12.142	16	0.7342	-0.006	0.0067	0.3746	+--+	0.7342	-0.0071	0.0018	6.153e-05	+++--+----------++--+	0.8578
16	19134892	none	rs6497331	29085	a	g	0.6681	0.0184	0.649	0.7048	-0.0078	0.002	8.799e-05	----?-----------+	0	9.237	15	0.8648	0.0071	0.0077	0.3612	+-++	0.8648	-0.0069	0.0019	0.0003969	----?-----------++-++	0.8241
3	132430819	DNAJC13	rs6439357	31478	t	g	0.6283	0.0106	0.604	0.6623	-0.0068	0.0017	8.833e-05	++-------+--+---+	24.8	23.92	16	0.09126	-0.0093	0.0064	0.1439	+---	0.09126	-0.007	0.0017	3.209e-05	++-------+--+---++---	0.1891
11	99459044	CNTN5	rs6590141	31478	t	g	0.7699	0.0162	0.715	0.7815	-0.0079	0.002	8.835e-05	-+--+--++--------	0	10.4	16	0.8449	-0.0008	0.0074	0.9145	-+-+	0.8449	-0.0074	0.0019	0.0001471	-+--+--++---------+-+	0.8684
10	29600511	SVIL	rs2488682	31478	a	g	0.5117	0.012	0.4973	0.55	-0.0066	0.0017	8.882e-05	-++-----+-----0-+	15.7	21.359	16	0.1651	-0.0025	0.0062	0.6826	+---	0.1651	-0.0063	0.0016	0.0001084	-++-----+-----0-++---	0.2231
10	83695745	none	rs17324239	31478	a	g	0.5462	0.0246	0.4604	0.5762	-0.0068	0.0017	8.888e-05	--------------+-+	0	10.062	16	0.8634	-0.0032	0.0061	0.5991	++--	0.8634	-0.0065	0.0017	9.78e-05	--------------+-+++--	0.9481
16	7336521	RBFOX1	rs6500949	31478	t	c	0.7117	0.0224	0.651	0.7583	0.0073	0.0019	8.974e-05	--+++++++++++-++-	0	14.076	16	0.593	-0.0011	0.0069	0.8724	-+++	0.593	0.0067	0.0018	0.0001933	--+++++++++++-++--+++	0.4545
7	97342253	none	rs11769117	31478	a	g	0.7714	0.0116	0.7495	0.8177	-0.0082	0.0021	9.022e-05	-+--------------+	0	6.03	16	0.9878	0.0019	0.0076	0.8043	--++	0.9878	-0.0075	0.002	0.0002155	-+--------------+--++	0.9355
20	43046993	PTPRT	rs2425566	31478	c	g	0.8157	0.0115	0.8011	0.841	0.0086	0.0022	9.06e-05	+-+++++++++++++--	0	12.239	16	0.7273	0.0041	0.0079	0.606	--++	0.7273	0.0083	0.0021	9.786e-05	+-+++++++++++++----++	0.6921
9	1124026	none	rs10733226	30477	c	g	0.5312	0.0095	0.4979	0.549	-0.0066	0.0017	9.064e-05	-++--+-+?----+---	0	6.531	15	0.9694	0.0053	0.0061	0.3819	--++	0.9694	-0.0058	0.0016	0.0004321	-++--+-+?----+-----++	0.8405
1	42164692	GUCA2A	rs2071499	31475	a	g	0.6226	0.0161	0.5929	0.6516	-0.0069	0.0018	9.068e-05	--+--+--------+-+	0	7.746	16	0.9561	-0.006	0.0066	0.3577	++--	0.9561	-0.0069	0.0017	6.472e-05	--+--+--------+-+++--	0.888
6	61528630	none	rs214140	28312	a	g	0.1714	0.0119	0.1563	0.21	-0.0094	0.0024	9.098e-05	?----+--+---+-+--	23.4	22.183	15	0.1031	0.0046	0.0083	0.5776	-+-+	0.1031	-0.0083	0.0023	0.0003372	?----+--+---+-+---+-+	0.07329
3	132431338	DNAJC13	rs3860499	31474	a	g	0.6282	0.0106	0.604	0.6622	-0.0068	0.0017	9.118e-05	++-------+--+---+	24.8	23.923	16	0.09119	-0.0094	0.0064	0.1423	+---	0.09119	-0.007	0.0017	3.291e-05	++-------+--+---++---	0.189
7	158429751	PTPRN2	rs1530930	31478	t	g	0.0337	0.0063	0.015	0.0434	-0.0189	0.0048	9.197e-05	--+---------+++-+	29.6	25.584	16	0.06017	-0.0148	0.0189	0.4319	--+-	0.06017	-0.0187	0.0047	7.16e-05	--+---------+++-+--+-	0.0908
3	38931100	SCN11A	rs7636049	31478	t	c	0.2138	0.0163	0.1706	0.229	-0.008	0.002	9.235e-05	-------++-++-+---	-8.3	16.628	16	0.41	0.0001	0.0073	0.992	--+-	0.41	-0.0074	0.002	0.0001853	-------++-++-+-----+-	0.3684
20	43045028	PTPRT	rs2425563	31478	a	g	0.1803	0.0127	0.1489	0.1945	-0.0089	0.0023	9.256e-05	-+-------------++	0	10.725	16	0.8261	-0.0048	0.0082	0.5563	++--	0.8261	-0.0086	0.0022	9.227e-05	-+-------------++++--	0.7607
11	13449633	BTBD10	rs986001	23394	c	g	0.1469	0.0079	0.13	0.1624	-0.011	0.0028	9.296e-05	--------+-?----?-	0	4.801	14	0.9884	0.0032	0.0107	0.7643	+-?-	0.9884	-0.0101	0.0027	0.0002287	--------+-?----?-+-?-	0.7903
5	71844497	none	rs1911936	31478	a	g	0.7346	0.0147	0.7086	0.7627	0.0077	0.002	9.387e-05	+-+++++++++--0+++	13.1	20.719	16	0.1896	-0.0011	0.0068	0.867	++--	0.1896	0.007	0.0019	0.0002125	+-+++++++++--0+++++--	0.04407
10	84623565	none	rs11201132	31478	c	g	0.9675	0.0064	0.95	0.9796	-0.0196	0.005	9.422e-05	-+----------+---+	0	10.043	16	0.8644	0.0136	0.0201	0.4986	++-+	0.8644	-0.0176	0.0049	0.0003013	-+----------+---+++-+	0.7783
2	239554431	none	rs1386001	24428	t	c	0.9395	0.0116	0.912	0.95	0.0201	0.0051	9.505e-05	+-+???+++++-+++++	0	10.478	13	0.6545	-0.0035	0.0182	0.8495	--++	0.6545	0.0184	0.005	0.0002179	+-+???+++++-+++++--++	0.7162
6	84782326	none	rs10455438	30577	a	g	0.3468	0.014	0.323	0.39	0.0068	0.0017	9.546e-05	+--+-+++-++++++++	0	14.718	16	0.5454	-0.0042	0.0066	0.5231	++--	0.5454	0.0061	0.0017	0.0003283	+--+-+++-++++++++++--	0.3918
11	99459734	CNTN5	rs10893371	31478	a	c	0.767	0.0147	0.715	0.7772	-0.0078	0.002	9.552e-05	-+--+--++--------	0	9.82	16	0.8759	-0.0021	0.0074	0.7763	-+-+	0.8759	-0.0074	0.0019	0.0001314	-+--+--++---------+-+	0.8866
6	58022329	none	rs12214353	25128	a	g	0.9296	0.0131	0.903	0.9739	0.0186	0.0048	9.558e-05	?-+?++++-+++-+-++	22.1	20.545	14	0.1139	0.0042	0.0173	0.8096	+?+-	0.1139	0.0175	0.0046	0.0001377	?-+?++++-+++-+-+++?+-	0.06967
20	43046036	PTPRT	rs910830	31478	a	g	0.184	0.0113	0.159	0.1982	-0.0086	0.0022	9.59e-05	-+-------------++	0	12.256	16	0.7262	-0.004	0.0079	0.609	++--	0.7262	-0.0082	0.0021	0.0001038	-+-------------++++--	0.6918
5	163758501	none	rs7447422	28294	t	c	0.9737	0.0047	0.9593	0.9781	-0.0327	0.0084	9.62e-05	---?---+-+--+-+--	0.7	17.118	15	0.3118	0.0344	0.0302	0.2536	+-+-	0.3118	-0.0278	0.0081	0.0005937	---?---+-+--+-+--+-+-	0.1733
10	84622700	none	rs11201130	31477	t	c	0.9674	0.0063	0.95	0.9796	-0.0195	0.005	9.626e-05	-+----------+---+	0	10.212	16	0.8553	0.0138	0.0201	0.4938	++-+	0.8553	-0.0175	0.0049	0.0003078	-+----------+---+++-+	0.7694
1	26344592	AIM1L	rs12562454	31478	t	g	0.1958	0.0086	0.1655	0.2248	-0.0083	0.0021	9.626e-05	-+-------+--++--+	0	14.211	16	0.583	-0.0081	0.008	0.3106	+---	0.583	-0.0082	0.0021	5.967e-05	-+-------+--++--++---	0.7471
16	51213467	none	rs6416795	31478	a	g	0.3128	0.0147	0.291	0.3563	0.0071	0.0018	9.633e-05	+-++++++--++++++-	0	14.505	16	0.5612	0.0045	0.0067	0.4961	+++-	0.5612	0.0069	0.0018	8.541e-05	+-++++++--++++++-+++-	0.7205
2	182291058	PDE1A	rs16823011	31478	t	c	0.8034	0.0139	0.7767	0.8328	0.0084	0.0021	9.654e-05	++++-+++-+++-++-+	0	13.947	16	0.6027	-0.0042	0.0079	0.5981	-+--	0.6027	0.0075	0.0021	0.0003099	++++-+++-+++-++-+-+--	0.5671
10	83690034	none	rs2065593	31478	t	c	0.5891	0.0137	0.5709	0.6114	-0.0067	0.0017	9.66e-05	--+-----------+-+	0	12.418	16	0.7148	-0.0075	0.0062	0.2246	++--	0.7148	-0.0067	0.0017	4.958e-05	--+-----------+-+++--	0.8132
20	43045867	PTPRT	rs910829	31478	c	g	0.184	0.0113	0.159	0.1981	-0.0086	0.0022	9.666e-05	-+-------------++	0	12.254	16	0.7263	-0.004	0.0079	0.6083	++--	0.7263	-0.0082	0.0021	0.0001045	-+-------------++++--	0.6922
11	11609686	GALNT18	rs10765874	25910	t	c	0.1152	0.0074	0.094	0.132	0.0119	0.003	9.671e-05	+++??+++--+++++++	0	7.702	14	0.9043	-0.0175	0.0096	0.06657	----	0.9043	0.0091	0.0029	0.001679	+++??+++--+++++++----	0.2274
15	79574330	none	rs1765262	31478	a	g	0.848	0.0157	0.7894	0.8671	-0.0093	0.0024	9.693e-05	---------+--+0+--	0	13.454	16	0.6393	0.0086	0.0086	0.3201	++++	0.6393	-0.008	0.0023	0.0005071	---------+--+0+--++++	0.5879
1	201928541	LMOD1	rs9787358	31478	a	g	0.2334	0.0181	0.1936	0.2632	0.0078	0.002	9.7e-05	+-+++++++++++0+++	0	14.204	16	0.5835	0.0003	0.0073	0.9629	++--	0.5835	0.0072	0.0019	0.000172	+-+++++++++++0+++++--	0.3715
5	71845215	none	rs7709962	31478	a	g	0.2654	0.0148	0.2372	0.2914	-0.0076	0.002	9.701e-05	-+---------++0---	13.2	20.736	16	0.1889	0.0011	0.0068	0.8671	--++	0.1889	-0.007	0.0019	0.0002188	-+---------++0-----++	0.04396
20	43045824	PTPRT	rs2425564	31478	t	c	0.816	0.0113	0.8019	0.841	0.0085	0.0022	9.755e-05	+-+++++++++++++--	0	12.25	16	0.7266	0.0041	0.0079	0.6068	--++	0.7266	0.0082	0.0021	0.0001051	+-+++++++++++++----++	0.693
1	26339110	AIM1L	rs11247921	31478	c	g	0.2102	0.0115	0.1767	0.25	-0.0079	0.002	9.786e-05	-+-------+--++---	0	13.965	16	0.6013	-0.0078	0.0078	0.3123	+---	0.6013	-0.0079	0.002	6.15e-05	-+-------+--++---+---	0.7672
10	84623962	none	rs10887337	31478	a	t	0.9676	0.0065	0.95	0.9796	-0.0196	0.005	9.788e-05	-+----------+---+	0	10.024	16	0.8654	0.0136	0.0201	0.4987	++-+	0.8654	-0.0176	0.0049	0.0003131	-+----------+---+++-+	0.7794
18	59514048	CCBE1	rs9953900	31478	t	c	0.7044	0.0153	0.678	0.771	0.0081	0.0021	9.843e-05	+++++-+-+++-+++-+	35.3	27.821	16	0.03321	-0.0029	0.0068	0.6645	---+	0.03321	0.0071	0.002	0.0003592	+++++-+-+++-+++-+---+	0.05202
6	58275475	none	rs1850417	25128	a	t	0.0917	0.011	0.0731	0.113	-0.0146	0.0037	9.873e-05	?--?-+--+-----+--	0	12.345	14	0.5786	-0.0125	0.0128	0.3281	-?-+	0.5786	-0.0144	0.0036	6.274e-05	?--?-+--+-----+---?-+	0.6606
9	33132519	B4GALT1	rs10511909	30477	c	g	0.1105	0.0083	0.0925	0.147	-0.0105	0.0027	9.907e-05	--+-----?---+----	0	6.035	15	0.9791	-0.0097	0.0099	0.3291	--+-	0.9791	-0.0105	0.0026	6.508e-05	--+-----?---+------+-	0.9486
2	239550361	none	rs1684268	31468	a	c	0.9568	0.0069	0.941	0.9712	0.0168	0.0043	9.93e-05	+++-+++++++++++++	0	13.187	16	0.659	0.0087	0.016	0.5855	+--+	0.659	0.0164	0.0042	9.46e-05	+++-++++++++++++++--+	0.7875
8	111811701	none	rs7009072	23394	a	g	0.2832	0.0148	0.2383	0.3028	-0.009	0.0023	9.946e-05	-+-----+-+?----?+	0	12.796	14	0.5426	-0.0158	0.0088	0.07312	--?-	0.5426	-0.0095	0.0022	2.487e-05	-+-----+-+?----?+--?-	0.5031
1	37762543	EPHA10	rs605359	31478	a	g	0.1744	0.0124	0.1514	0.214	-0.0087	0.0022	9.947e-05	-----+-+----0----	0	14.131	16	0.589	-0.0094	0.0088	0.2859	----	0.589	-0.0088	0.0022	5.799e-05	-----+-+----0--------	0.7863
8	2683827	none	rs6558679	31478	a	t	0.4639	0.0157	0.4215	0.4836	0.0068	0.0017	9.976e-05	++--+-+-+++-++++-	27.6	24.855	16	0.07243	-0.0005	0.0063	0.9412	+--+	0.07243	0.0063	0.0017	0.0001948	++--+-+-+++-++++-+--+	0.0156
