# Supplementary material for: The complex genetics of gait speed: genome-wide meta-analysis approach
Source: Aging (Albany NY). 2017 Jan 10;9(1):209–46. doi: 10.18632/aging.101151 (PMC5310665; doi:10.18632/aging.101151)
Supplement: Supplementary file 4 [file aging-09-0209-s004.xlsx]

## Sheet: candidate-sig
Reported candidate genes
CHR	Pos 1	Gene	rs	Weight	Allele1	Allele2	Freq1	FreqSE	MinFreq	MaxFreq	Effect	StdErr	P-value	HetISq	HetChiSq	HetDf	HetPVal
chr17	63473167	ACE	rs1800764	34066	t	c	0.5415	0.0131	0.512	0.5716	0.0008	0.0017	0.6367	0	15.49	20	0.7477
chr17	63478304	ACE	rs4293	34066	a	g	0.5447	0.0133	0.513	0.5755	0.0011	0.0017	0.4921	0	14.563	20	0.8009
chr17	63478936	ACE	rs4295	34066	c	g	0.3737	0.0298	0.3237	0.4277	-0.0016	0.0018	0.3739	0	13.398	20	0.8596
chr17	63480867	ACE	rs4305	34061	a	g	0.4495	0.0147	0.4176	0.482	-0.0009	0.0017	0.5761	0	14.12	20	0.8244
chr17	63482561	ACE	rs4309	34065	t	c	0.4323	0.0135	0.37	0.4565	-0.0009	0.0017	0.5779	0	9.811	20	0.9715
chr17	63483401	ACE	rs4311	34064	t	c	0.4701	0.0209	0.4116	0.555	-0.0019	0.0016	0.257	0	12.008	20	0.9158
chr17	63484947	ACE	rs4316	34066	t	c	0.468	0.0184	0.38	0.5028	0.0015	0.0016	0.3503	0	10.647	20	0.9549
chr17	63486096	ACE	rs4329	34066	a	g	0.5296	0.02	0.5006	0.619	-0.0012	0.0016	0.4717	0	11.517	20	0.9317
chr17	63487160	ACE	rs4333	34066	t	c	0.5283	0.0194	0.4992	0.61	-0.001	0.0016	0.5324	0	11.941	20	0.9181
chr17	63488669	ACE	rs4343	34064	a	g	0.4764	0.0201	0.393	0.505	0.0009	0.0016	0.5663	0	11.961	20	0.9174
chr17	63489362	ACE	rs4344	34066	a	g	0.4728	0.02	0.392	0.5049	0.0009	0.0016	0.5675	0	12.084	20	0.9131
chr17	63492370	ACE	rs4351	34066	a	g	0.4876	0.0252	0.403	0.5165	0.0009	0.0017	0.5862	0	14.371	20	0.8112
chr17	63493060	ACE	rs4353	34065	a	g	0.5229	0.0235	0.4854	0.609	-0.0007	0.0016	0.6597	0	15.609	20	0.7406
chr17	63494268	ACE	rs4357	25038	t	c	0.086	0.0146	0.069	0.1051	-0.0008	0.0058	0.8846	21.9	20.479	14	0.1158
chr17	63496399	ACE	rs4362	34064	t	c	0.5212	0.0237	0.4833	0.605	-0.0007	0.0017	0.6855	0	16.593	20	0.6792
chr17	63497130	ACE	rs4363	34066	a	g	0.4835	0.0251	0.402	0.5306	0.0009	0.0017	0.6121	0	14.882	20	0.7831
chr17	63500686	ACE	rs4461142	34066	t	c	0.4806	0.0232	0.4313	0.542	-0.0014	0.0017	0.3907	0	18.128	20	0.579
chr11	66543539	ACTN3	rs3825065	25022	a	g	0.7596	0.0146	0.7383	0.7933	0.0032	0.0023	0.1609	-10.4	17.217	17	0.4398
chr11	66548189	ACTN3	rs544021	34066	c	g	0.5658	0.0111	0.538	0.5907	-0.0017	0.0017	0.2943	0	15.599	20	0.7411
chr11	66549085	ACTN3	rs597626	34066	t	c	0.4342	0.0111	0.4093	0.462	0.0017	0.0017	0.2962	0	15.578	20	0.7424
chr11	66549772	ACTN3	rs12418904	30882	a	c	0.9276	0.013	0.8877	0.9441	-0.002	0.0039	0.6095	-7.3	19.565	19	0.4212
chr11	66550351	ACTN3	rs1791690	34066	a	g	0.4346	0.0113	0.4093	0.462	0.0017	0.0017	0.2951	0	15.523	20	0.7458
chr11	66551500	ACTN3	rs490998	34064	a	g	0.4343	0.0111	0.4092	0.462	0.0018	0.0016	0.2757	0	15.67	20	0.7369
chr11	66557111	ACTN3	rs678397	25022	t	c	0.4645	0.0236	0.4381	0.5403	-0.0026	0.0019	0.1748	0	15.909	17	0.5303
chr11	66557290	ACTN3	rs677488	34066	t	c	0.5372	0.0201	0.4596	0.5733	0.0018	0.0016	0.2653	0	16.75	20	0.6691
chr11	66558890	ACTN3	rs509556	34066	a	g	0.4603	0.0211	0.4252	0.5404	-0.0019	0.0016	0.2353	0	16.883	20	0.6606
chr11	66559109	ACTN3	rs2275998	34065	t	c	0.8286	0.0136	0.8053	0.8549	0.002	0.0022	0.3579	0	16.4	20	0.6915
chr11	66560201	ACTN3	rs1671064	34066	a	g	0.5469	0.0221	0.4611	0.5751	0.0016	0.0016	0.3195	0	17.591	20	0.6143
chr11	66560623	ACTN3	rs1815739	34066	t	c	0.4522	0.0223	0.4249	0.5378	-0.0015	0.0016	0.3426	0	17.231	20	0.638
chr11	66561247	ACTN3	rs618838	34066	t	c	0.4527	0.0217	0.4249	0.5367	-0.0016	0.0016	0.3128	0	17.507	20	0.6198
chr11	66562260	ACTN3	rs540874	34065	a	g	0.4528	0.0215	0.4249	0.536	-0.0016	0.0016	0.315	0	17.415	20	0.6259
chr11	66563528	ACTN3	rs4576	34066	a	g	0.7576	0.0137	0.7343	0.7933	0.0028	0.0019	0.1449	0	15.669	20	0.7369
chr11	66563697	ACTN3	rs13897	34065	t	c	0.0794	0.0118	0.0618	0.1134	-0.0033	0.0031	0.2844	0	16.925	20	0.6579
chr11	66563986	ACTN3	rs572846	34066	a	g	0.4611	0.0199	0.434	0.5359	-0.0017	0.0016	0.2908	0	16.97	20	0.6549
chr22	19938807	COMT	rs2871047	34066	a	g	0.0483	0.0085	0.0306	0.0561	-0.003	0.0042	0.4805	-0.2	21.963	20	0.3425
chr22	19941282	COMT	rs4646310	34061	a	g	0.1937	0.0205	0.1471	0.2448	0.0045	0.0021	0.02954	27.5	30.359	20	0.06424
chr22	19941360	COMT	rs2020917	34056	t	c	0.28	0.0187	0.243	0.329	-0.0012	0.0018	0.4973	-7.9	20.392	20	0.4337
chr22	19942585	COMT	rs737866	34064	t	c	0.7196	0.0181	0.671	0.7565	0.0014	0.0018	0.4373	-9.3	20.128	20	0.45
chr22	19942597	COMT	rs737865	34066	a	g	0.7194	0.0183	0.67	0.7565	0.0015	0.0018	0.42	-6.9	20.574	20	0.4226
chr22	19943883	COMT	rs933271	34066	t	c	0.7155	0.0179	0.676	0.7561	-0.0031	0.0018	0.08586	14.7	25.799	20	0.1726
chr22	19944144	COMT	rs1544325	34065	a	g	0.4347	0.0311	0.346	0.4787	-0.0012	0.0016	0.4794	8.7	24.087	20	0.2386
chr22	19946501	COMT	rs174674	34066	a	g	0.2866	0.0182	0.245	0.324	0.0031	0.0019	0.09505	7.9	23.886	20	0.2474
chr22	19946527	COMT	rs174675	34061	t	c	0.2849	0.0193	0.2409	0.324	0.0029	0.0018	0.1126	10.4	24.547	20	0.2193
chr22	19950009	COMT	rs5993882	34066	t	g	0.7633	0.0213	0.715	0.8113	-0.0039	0.0019	0.0435	6.3	23.476	20	0.266
chr22	19950114	COMT	rs5993883	34065	t	g	0.478	0.0342	0.378	0.5267	-0.0018	0.0016	0.2656	-0.5	21.9	20	0.346
chr22	19957653	COMT	rs740603	34066	a	g	0.4775	0.0283	0.374	0.521	-0.0004	0.0018	0.8142	3.1	22.705	20	0.3035
chr22	19960813	COMT	rs4646312	34055	t	c	0.6082	0.0228	0.546	0.6454	0.0019	0.0017	0.2518	0	16.204	20	0.7039
chr22	19962711	COMT	rs4633	34066	t	c	0.5307	0.0281	0.474	0.5848	0.0023	0.0017	0.1603	17.4	26.632	20	0.1459
chr22	19962904	COMT	rs2239393	34066	a	g	0.6052	0.0226	0.546	0.6456	0.0017	0.0017	0.3116	0	16.436	20	0.6892
chr22	19963239	COMT	rs740601	25022	t	g	0.604	0.0266	0.545	0.6456	0.001	0.002	0.6116	0	14.83	17	0.6077
chr22	19963683	COMT	rs4818	25022	c	g	0.604	0.0266	0.545	0.6457	0.0011	0.002	0.5924	0	14.829	17	0.6078
chr22	19963747	COMT	rs4680	34063	a	g	0.5254	0.0278	0.462	0.5794	0.0021	0.0016	0.1936	19.5	27.323	20	0.1264
chr22	19964608	COMT	rs4646316	34066	t	c	0.2321	0.0132	0.2076	0.268	-0.0004	0.002	0.8509	0	17.734	20	0.6049
chr22	19965037	COMT	rs165774	33617	a	g	0.3184	0.0079	0.296	0.3386	0.0006	0.0019	0.7588	0.7	21.154	19	0.3284
chr22	19965652	COMT	rs174696	34066	t	c	0.7801	0.0147	0.7606	0.822	-0.0002	0.0023	0.9462	20.6	27.699	20	0.1167
chr22	19966308	COMT	rs174697	34066	a	g	0.0504	0.008	0.037	0.0618	0.001	0.004	0.801	11.4	24.818	20	0.2085
chr22	19966934	COMT	rs174699	34065	t	c	0.9479	0.0077	0.9348	0.9599	-0.0004	0.0039	0.9195	13.8	25.517	20	0.1824
chr22	19968168	COMT	rs9332377	34066	t	c	0.151	0.0129	0.1172	0.1701	-0.0015	0.0024	0.5322	0	9.198	20	0.9805
chr22	19969499	COMT	rs165728	34066	t	c	0.9497	0.0077	0.9366	0.963	-0.0007	0.004	0.8604	5.4	23.26	20	0.2762
chr22	19971145	COMT	rs165849	25022	a	g	0.7033	0.0202	0.6751	0.7355	0.0031	0.0022	0.1537	28.5	26.563	17	0.06479
chr19	44903415	APOE	rs10119	33621	a	g	0.2819	0.0276	0.22	0.361	-0.0046	0.0021	0.02601	0	17.814	19	0.5349
chr19	44905578	APOE	rs405509	31234	t	g	0.4718	0.0143	0.431	0.5241	-0.0007	0.0017	0.7053	0	13.09	18	0.7862
chr19	44911193	APOE	rs439401	29120	t	c	0.3715	0.0127	0.3382	0.3908	0.0008	0.0018	0.6511	-6.5	16.905	16	0.3918
