# Supplementary material for: The complex genetics of gait speed: genome-wide meta-analysis approach
Source: Aging (Albany NY). 2017 Jan 10;9(1):209–46. doi: 10.18632/aging.101151 (PMC5310665; doi:10.18632/aging.101151)
Supplement: Supplementary file 5 [file aging-09-0209-s005.xlsx]

## Sheet: Sheet0
Candidate genes
ID	Symbol	Entrez Gene Name	Location	Type(s)	Biomarker Application(s)	Drug(s)
rs919374	ADAMTS18	ADAM metallopeptidase with thrombospondin type 1 motif, 18	Extracellular Space	peptidase
rs919376	ADAMTS18	ADAM metallopeptidase with thrombospondin type 1 motif, 18	Extracellular Space	peptidase
rs12925727	ADAMTS18	ADAM metallopeptidase with thrombospondin type 1 motif, 18	Extracellular Space	peptidase
rs12934271	ADAMTS18	ADAM metallopeptidase with thrombospondin type 1 motif, 18	Extracellular Space	peptidase
rs2162954	ADAMTS18	ADAM metallopeptidase with thrombospondin type 1 motif, 18	Extracellular Space	peptidase
rs2840102	ADAMTS18	ADAM metallopeptidase with thrombospondin type 1 motif, 18	Extracellular Space	peptidase
rs12934409	ADAMTS18	ADAM metallopeptidase with thrombospondin type 1 motif, 18	Extracellular Space	peptidase
rs10781985	ADAMTS18	ADAM metallopeptidase with thrombospondin type 1 motif, 18	Extracellular Space	peptidase
rs10781986	ADAMTS18	ADAM metallopeptidase with thrombospondin type 1 motif, 18	Extracellular Space	peptidase
rs11149989	ADAMTS18	ADAM metallopeptidase with thrombospondin type 1 motif, 18	Extracellular Space	peptidase
rs8059111	ADAMTS18	ADAM metallopeptidase with thrombospondin type 1 motif, 18	Extracellular Space	peptidase
rs10781987	ADAMTS18	ADAM metallopeptidase with thrombospondin type 1 motif, 18	Extracellular Space	peptidase
rs12562454	AIM1L	absent in melanoma 1-like	Extracellular Space	other
rs11247921	AIM1L	absent in melanoma 1-like	Extracellular Space	other
rs4837138	ASTN2	astrotactin 2	Cytoplasm	other
rs7029526	ASTN2	astrotactin 2	Cytoplasm	other
rs7862181	ASTN2	astrotactin 2	Cytoplasm	other
rs10818028	ASTN2	astrotactin 2	Cytoplasm	other
rs7862524	ASTN2	astrotactin 2	Cytoplasm	other
rs10983635	ASTN2	astrotactin 2	Cytoplasm	other
rs10759918	ASTN2	astrotactin 2	Cytoplasm	other
rs10511909	B4GALT1	UDP-Gal:betaGlcNAc beta 1,4- galactosyltransferase, polypeptide 1	Cytoplasm	enzyme	diagnosis
rs10832034	BTBD10	BTB (POZ) domain containing 10	Cytoplasm	other
rs986001	BTBD10	BTB (POZ) domain containing 10	Cytoplasm	other
rs9926669	CACNG3	calcium channel, voltage-dependent, gamma subunit 3	Plasma Membrane	ion channel
rs12599474	CACNG3	calcium channel, voltage-dependent, gamma subunit 3	Plasma Membrane	ion channel
rs1859199	CACNG3	calcium channel, voltage-dependent, gamma subunit 3	Plasma Membrane	ion channel
rs7204986	CACNG3	calcium channel, voltage-dependent, gamma subunit 3	Plasma Membrane	ion channel
rs13337712	CACNG3	calcium channel, voltage-dependent, gamma subunit 3	Plasma Membrane	ion channel
rs8055531	CACNG3	calcium channel, voltage-dependent, gamma subunit 3	Plasma Membrane	ion channel
rs7200040	CACNG3	calcium channel, voltage-dependent, gamma subunit 3	Plasma Membrane	ion channel
rs4938195	CADM1	cell adhesion molecule 1	Plasma Membrane	other
rs4938196	CADM1	cell adhesion molecule 1	Plasma Membrane	other
rs11215467	CADM1	cell adhesion molecule 1	Plasma Membrane	other
rs4558500	CCBE1	collagen and calcium binding EGF domains 1	Extracellular Space	other
rs9953900	CCBE1	collagen and calcium binding EGF domains 1	Extracellular Space	other
rs11861812	CDH13	cadherin 13	Plasma Membrane	other	diagnosis,disease progression,prognosis
rs9972881	CEP112	centrosomal protein 112kDa	Cytoplasm	other
rs9972944	CEP112	centrosomal protein 112kDa	Cytoplasm	other
rs9972885	CEP112	centrosomal protein 112kDa	Cytoplasm	other
rs9972883	CEP112	centrosomal protein 112kDa	Cytoplasm	other
rs9303489	CEP112	centrosomal protein 112kDa	Cytoplasm	other
rs12939558	CEP112	centrosomal protein 112kDa	Cytoplasm	other
rs10083855	CEP112	centrosomal protein 112kDa	Cytoplasm	other
rs10083870	CEP112	centrosomal protein 112kDa	Cytoplasm	other
rs10083872	CEP112	centrosomal protein 112kDa	Cytoplasm	other
rs10083877	CEP112	centrosomal protein 112kDa	Cytoplasm	other
rs7502798	CEP112	centrosomal protein 112kDa	Cytoplasm	other
rs10512505	CEP112	centrosomal protein 112kDa	Cytoplasm	other
rs7225471	CEP112	centrosomal protein 112kDa	Cytoplasm	other
rs9972954	CEP112	centrosomal protein 112kDa	Cytoplasm	other
rs10083837	CEP112	centrosomal protein 112kDa	Cytoplasm	other
rs10512504	CEP112	centrosomal protein 112kDa	Cytoplasm	other
rs10512503	CEP112	centrosomal protein 112kDa	Cytoplasm	other
rs1421032	CEP112	centrosomal protein 112kDa	Cytoplasm	other
rs7207587	CEP112	centrosomal protein 112kDa	Cytoplasm	other
rs2318868	CEP112	centrosomal protein 112kDa	Cytoplasm	other
rs6416948	CEP112	centrosomal protein 112kDa	Cytoplasm	other
rs1421033	CEP112	centrosomal protein 112kDa	Cytoplasm	other
rs6416949	CEP112	centrosomal protein 112kDa	Cytoplasm	other
rs7211481	CEP112	centrosomal protein 112kDa	Cytoplasm	other
rs2318869	CEP112	centrosomal protein 112kDa	Cytoplasm	other
rs9894298	CEP112	centrosomal protein 112kDa	Cytoplasm	other
rs7218844	CEP112	centrosomal protein 112kDa	Cytoplasm	other
rs4791132	CEP112	centrosomal protein 112kDa	Cytoplasm	other
rs9901885	CEP112	centrosomal protein 112kDa	Cytoplasm	other
rs7215462	CEP112	centrosomal protein 112kDa	Cytoplasm	other
rs9972942	CEP112	centrosomal protein 112kDa	Cytoplasm	other
rs8076925	CEP112	centrosomal protein 112kDa	Cytoplasm	other
rs11870607	CEP112	centrosomal protein 112kDa	Cytoplasm	other
rs7220733	CEP112	centrosomal protein 112kDa	Cytoplasm	other
rs6504357	CEP112	centrosomal protein 112kDa	Cytoplasm	other
rs8077164	CEP112	centrosomal protein 112kDa	Cytoplasm	other
rs9899781	CEP112	centrosomal protein 112kDa	Cytoplasm	other
rs9907969	CEP112	centrosomal protein 112kDa	Cytoplasm	other
rs10501909	CNTN5	contactin 5	Plasma Membrane	other
rs12280637	CNTN5	contactin 5	Plasma Membrane	other
rs10501911	CNTN5	contactin 5	Plasma Membrane	other
rs11219911	CNTN5	contactin 5	Plasma Membrane	other
rs10501913	CNTN5	contactin 5	Plasma Membrane	other
rs10501912	CNTN5	contactin 5	Plasma Membrane	other
rs10893324	CNTN5	contactin 5	Plasma Membrane	other
rs10893353	CNTN5	contactin 5	Plasma Membrane	other
rs2656181	CNTN5	contactin 5	Plasma Membrane	other
rs7123538	CNTN5	contactin 5	Plasma Membrane	other
rs2726391	CNTN5	contactin 5	Plasma Membrane	other
rs2656193	CNTN5	contactin 5	Plasma Membrane	other
rs7945901	CNTN5	contactin 5	Plasma Membrane	other
rs10893403	CNTN5	contactin 5	Plasma Membrane	other
rs1504733	CNTN5	contactin 5	Plasma Membrane	other
rs7937401	CNTN5	contactin 5	Plasma Membrane	other
rs12290503	CNTN5	contactin 5	Plasma Membrane	other
rs6590141	CNTN5	contactin 5	Plasma Membrane	other
rs10893371	CNTN5	contactin 5	Plasma Membrane	other
rs17037196	CTDSPL	CTD (carboxy-terminal domain, RNA polymerase II, polypeptide A) small phosphatase-like	Nucleus	other	unspecified application
rs9868023	CTDSPL	CTD (carboxy-terminal domain, RNA polymerase II, polypeptide A) small phosphatase-like	Nucleus	other	unspecified application
rs6768915	CTDSPL	CTD (carboxy-terminal domain, RNA polymerase II, polypeptide A) small phosphatase-like	Nucleus	other	unspecified application
rs7624710	CTDSPL	CTD (carboxy-terminal domain, RNA polymerase II, polypeptide A) small phosphatase-like	Nucleus	other	unspecified application
rs1190715	DIO3OS	DIO3 opposite strand/antisense RNA (head to head)	Other	other
rs6439357	DNAJC13	DnaJ (Hsp40) homolog, subfamily C, member 13	Cytoplasm	other
rs3860499	DNAJC13	DnaJ (Hsp40) homolog, subfamily C, member 13	Cytoplasm	other
rs663428	EPHA10	EPH receptor A10	Plasma Membrane	transmembrane receptor
rs605359	EPHA10	EPH receptor A10	Plasma Membrane	transmembrane receptor
rs480906	FHOD3	formin homology 2 domain containing 3	Nucleus	other
rs677347	FHOD3	formin homology 2 domain containing 3	Nucleus	other
rs507163	FHOD3	formin homology 2 domain containing 3	Nucleus	other
rs500871	FHOD3	formin homology 2 domain containing 3	Nucleus	other
rs2670669	FHOD3	formin homology 2 domain containing 3	Nucleus	other
rs2625065	FHOD3	formin homology 2 domain containing 3	Nucleus	other
rs2670671	FHOD3	formin homology 2 domain containing 3	Nucleus	other
rs2848589	FHOD3	formin homology 2 domain containing 3	Nucleus	other
rs1996141	FHOD3	formin homology 2 domain containing 3	Nucleus	other
rs4799416	FHOD3	formin homology 2 domain containing 3	Nucleus	other
rs10164207	FHOD3	formin homology 2 domain containing 3	Nucleus	other
rs17746090	FHOD3	formin homology 2 domain containing 3	Nucleus	other
rs2847515	FHOD3	formin homology 2 domain containing 3	Nucleus	other
rs17673157	FHOD3	formin homology 2 domain containing 3	Nucleus	other
rs17746071	FHOD3	formin homology 2 domain containing 3	Nucleus	other
rs12966207	FHOD3	formin homology 2 domain containing 3	Nucleus	other
rs2077673	FHOD3	formin homology 2 domain containing 3	Nucleus	other
rs6883877	GABRA1	gamma-aminobutyric acid (GABA) A receptor, alpha 1	Plasma Membrane	ion channel		methohexital, primidone, meprobamate, aspirin/butalbital/caffeine, aspirin/meprobamate, aspirin/butalbital/caffeine/codeine, hexobarbital, pagoclone, ethchlorvynol, alphadolone, SEP 174559, heptabarbital, zopiclone, glutethimide, clobazam, nitrazepam, phentermine/topiramate, caffeine/ethanol, adinazolam, butobarbital, acetaminophen/butalbital/caffeine, sevoflurane, isoflurane, gaboxadol, isoniazi…
rs10765874	GALNT18	polypeptide N-acetylgalactosaminyltransferase 18	Cytoplasm	enzyme
rs4682146	GRAMD1C	GRAM domain containing 1C	Other	other
rs4422272	GRAMD1C	GRAM domain containing 1C	Other	other
rs2071499	GUCA2A	guanylate cyclase activator 2A (guanylin)	Extracellular Space	other
rs11966040	HCG20	HLA complex group 20 (non-protein coding)	Other	other
rs11964596	HCG20	HLA complex group 20 (non-protein coding)	Other	other
rs9501255	HLA-DPB1	major histocompatibility complex, class II, DP beta 1	Plasma Membrane	transmembrane receptor
rs3749985	HLA-DPB1	major histocompatibility complex, class II, DP beta 1	Plasma Membrane	transmembrane receptor
rs9501263	HLA-DPB1	major histocompatibility complex, class II, DP beta 1	Plasma Membrane	transmembrane receptor
rs7091957	INPP5A	inositol polyphosphate-5-phosphatase A	Plasma Membrane	phosphatase
rs4880419	INPP5A	inositol polyphosphate-5-phosphatase A	Plasma Membrane	phosphatase
rs7663516	KIAA1211	KIAA1211	Other	other
rs17076478	LINC00540	long intergenic non-protein coding RNA 540	Other	other
rs17076477	LINC00540	long intergenic non-protein coding RNA 540	Other	other
rs2125698	LINC01179	long intergenic non-protein coding RNA 1179	Other	other
rs17688831	LINC01179	long intergenic non-protein coding RNA 1179	Other	other
rs2964037	LINC01411	long intergenic non-protein coding RNA 1411	Other	other
rs2909716	LINC01411	long intergenic non-protein coding RNA 1411	Other	other
rs2964041	LINC01411	long intergenic non-protein coding RNA 1411	Other	other
rs2936944	LINC01411	long intergenic non-protein coding RNA 1411	Other	other
rs2913513	LINC01411	long intergenic non-protein coding RNA 1411	Other	other
rs2913507	LINC01411	long intergenic non-protein coding RNA 1411	Other	other
rs2913508	LINC01411	long intergenic non-protein coding RNA 1411	Other	other
rs2964050	LINC01411	long intergenic non-protein coding RNA 1411	Other	other
rs2936939	LINC01411	long intergenic non-protein coding RNA 1411	Other	other
rs2936942	LINC01411	long intergenic non-protein coding RNA 1411	Other	other
rs2913512	LINC01411	long intergenic non-protein coding RNA 1411	Other	other
rs9787358	LMOD1	leiomodin 1 (smooth muscle)	Cytoplasm	other	unspecified application
rs2042123	LOC101927213	uncharacterized LOC101927213	Other	other
rs12713318	LOC101927213	uncharacterized LOC101927213	Other	other
rs12214353	LOC101927293	uncharacterized LOC101927293	Other	other
rs1626021	LOC101927789	putative ubiquitin-like protein FUBI-like protein ENSP00000310146	Other	other
rs2846861	LOC101927789	putative ubiquitin-like protein FUBI-like protein ENSP00000310146	Other	other
rs1784859	LOC101927789	putative ubiquitin-like protein FUBI-like protein ENSP00000310146	Other	other
rs6558679	LOC101927815	uncharacterized LOC101927815	Other	other
rs10210510	LOC101927960	uncharacterized LOC101927960	Other	other
rs13124558	LOC102723906	uncharacterized LOC102723906	Other	other
rs13023575	LOC105374497	uncharacterized LOC105374497	Other	other
rs11765888	LOC105375416	uncharacterized LOC105375416	Other	other
rs13247934	LOC105375416	uncharacterized LOC105375416	Other	other
rs11769117	LOC105375416	uncharacterized LOC105375416	Other	other
rs2129800	LOC105375523	uncharacterized LOC105375523	Other	other
rs13273225	LOC105375759	uncharacterized LOC105375759	Other	other
rs1902408	LOC105376490	uncharacterized LOC105376490	Other	other
rs11728805	LOC105377490	uncharacterized LOC105377490	Other	other
rs11727661	LOC105377490	uncharacterized LOC105377490	Other	other
rs11727800	LOC105377490	uncharacterized LOC105377490	Other	other
rs11732361	LOC105377490	uncharacterized LOC105377490	Other	other
rs4309822	LOC105377490	uncharacterized LOC105377490	Other	other
rs1223581	LOC105378438	uncharacterized LOC105378438	Other	other
rs1911936	LOC105379027	uncharacterized LOC105379027	Other	other
rs7709962	LOC105379027	uncharacterized LOC105379027	Other	other
rs1546519	LYN	LYN proto-oncogene, Src family tyrosine kinase	Cytoplasm	kinase		nintedanib, bosutinib
rs12508545	MAPK10	mitogen-activated protein kinase 10	Cytoplasm	kinase
rs12508579	MAPK10	mitogen-activated protein kinase 10	Cytoplasm	kinase
rs12512524	MAPK10	mitogen-activated protein kinase 10	Cytoplasm	kinase
rs12508156	MAPK10	mitogen-activated protein kinase 10	Cytoplasm	kinase
rs12499206	MAPK10	mitogen-activated protein kinase 10	Cytoplasm	kinase
rs12505291	MAPK10	mitogen-activated protein kinase 10	Cytoplasm	kinase
rs12500132	MAPK10	mitogen-activated protein kinase 10	Cytoplasm	kinase
rs6084497	MAVS	mitochondrial antiviral signaling protein	Cytoplasm	other
rs9323140	MDGA2	MAM domain containing glycosylphosphatidylinositol anchor 2	Other	other
rs2416075	MDGA2	MAM domain containing glycosylphosphatidylinositol anchor 2	Other	other
rs7148160	MDGA2	MAM domain containing glycosylphosphatidylinositol anchor 2	Other	other
rs10136665	MDGA2	MAM domain containing glycosylphosphatidylinositol anchor 2	Other	other
rs10138882	MDGA2	MAM domain containing glycosylphosphatidylinositol anchor 2	Other	other
rs8016913	MDGA2	MAM domain containing glycosylphosphatidylinositol anchor 2	Other	other
rs13379367	MDGA2	MAM domain containing glycosylphosphatidylinositol anchor 2	Other	other
rs10149027	MDGA2	MAM domain containing glycosylphosphatidylinositol anchor 2	Other	other
rs3818722	MTRF1	mitochondrial translational release factor 1	Cytoplasm	translation regulator
rs12155739	NCALD	neurocalcin delta	Cytoplasm	other
rs7090013	NEBL	nebulette	Plasma Membrane	other
rs16823010	PDE1A	phosphodiesterase 1A, calmodulin-dependent	Cytoplasm	enzyme
rs16823011	PDE1A	phosphodiesterase 1A, calmodulin-dependent	Cytoplasm	enzyme
rs4277628	PDZRN3	PDZ domain containing ring finger 3	Extracellular Space	enzyme
rs4677292	PDZRN3	PDZ domain containing ring finger 3	Extracellular Space	enzyme
rs4371454	PDZRN3	PDZ domain containing ring finger 3	Extracellular Space	enzyme
rs12632755	PDZRN3	PDZ domain containing ring finger 3	Extracellular Space	enzyme
rs12632758	PDZRN3	PDZ domain containing ring finger 3	Extracellular Space	enzyme
rs7426511	PDZRN3	PDZ domain containing ring finger 3	Extracellular Space	enzyme
rs6909834	PHACTR1	phosphatase and actin regulator 1	Cytoplasm	other
rs1953089	PHACTR1	phosphatase and actin regulator 1	Cytoplasm	other
rs9463134	PHACTR1	phosphatase and actin regulator 1	Cytoplasm	other
rs6916334	PHACTR1	phosphatase and actin regulator 1	Cytoplasm	other
rs6917493	PHACTR1	phosphatase and actin regulator 1	Cytoplasm	other
rs12523719	PHACTR1	phosphatase and actin regulator 1	Cytoplasm	other
rs4714870	PHACTR1	phosphatase and actin regulator 1	Cytoplasm	other
rs1412753	PHACTR1	phosphatase and actin regulator 1	Cytoplasm	other
rs2327619	PHACTR1	phosphatase and actin regulator 1	Cytoplasm	other
rs950720	PHACTR1	phosphatase and actin regulator 1	Cytoplasm	other
rs6922482	PHACTR1	phosphatase and actin regulator 1	Cytoplasm	other
rs7760140	PHACTR1	phosphatase and actin regulator 1	Cytoplasm	other
rs10948247	PHACTR1	phosphatase and actin regulator 1	Cytoplasm	other
rs883947	PHACTR1	phosphatase and actin regulator 1	Cytoplasm	other
rs9296464	PHACTR1	phosphatase and actin regulator 1	Cytoplasm	other
rs10948235	PHACTR1	phosphatase and actin regulator 1	Cytoplasm	other
rs13217579	PHACTR1	phosphatase and actin regulator 1	Cytoplasm	other
rs1412752	PHACTR1	phosphatase and actin regulator 1	Cytoplasm	other
rs6941624	PHACTR1	phosphatase and actin regulator 1	Cytoplasm	other
rs7757205	PHACTR1	phosphatase and actin regulator 1	Cytoplasm	other
rs7760286	PHACTR1	phosphatase and actin regulator 1	Cytoplasm	other
rs9395190	PHACTR1	phosphatase and actin regulator 1	Cytoplasm	other
rs9296494	PHACTR1	phosphatase and actin regulator 1	Cytoplasm	other
rs649722	POLI	polymerase (DNA directed) iota	Nucleus	enzyme
rs535154	POLI	polymerase (DNA directed) iota	Nucleus	enzyme
rs1787828	POLI	polymerase (DNA directed) iota	Nucleus	enzyme
rs664501	POLI	polymerase (DNA directed) iota	Nucleus	enzyme
rs12205722	PRIM2	primase, DNA, polypeptide 2 (58kDa)	Nucleus	enzyme		cytarabine/fludarabine phosphate, cyclophosphamide/fludarabine phosphate/rituximab, cytarabine/filgrastim/fludarabine phosphate, fludarabine phosphate/rituximab, dexamethasone/fludarabine phosphate/mitoxantrone, alemtuzumab/cyclophosphamide/fludarabine phosphate/rituximab, alemtuzumab/fludarabine phosphate, cytarabine/fludarabine phosphate/oxaliplatin/rituximab, cyclophosphamide/fludarabine phosp…
rs12208485	PRIM2	primase, DNA, polypeptide 2 (58kDa)	Nucleus	enzyme		cytarabine/fludarabine phosphate, cyclophosphamide/fludarabine phosphate/rituximab, cytarabine/filgrastim/fludarabine phosphate, fludarabine phosphate/rituximab, dexamethasone/fludarabine phosphate/mitoxantrone, alemtuzumab/cyclophosphamide/fludarabine phosphate/rituximab, alemtuzumab/fludarabine phosphate, cytarabine/fludarabine phosphate/oxaliplatin/rituximab, cyclophosphamide/fludarabine phosp…
rs12205821	PRIM2	primase, DNA, polypeptide 2 (58kDa)	Nucleus	enzyme		cytarabine/fludarabine phosphate, cyclophosphamide/fludarabine phosphate/rituximab, cytarabine/filgrastim/fludarabine phosphate, fludarabine phosphate/rituximab, dexamethasone/fludarabine phosphate/mitoxantrone, alemtuzumab/cyclophosphamide/fludarabine phosphate/rituximab, alemtuzumab/fludarabine phosphate, cytarabine/fludarabine phosphate/oxaliplatin/rituximab, cyclophosphamide/fludarabine phosp…
rs12213707	PRIM2	primase, DNA, polypeptide 2 (58kDa)	Nucleus	enzyme		cytarabine/fludarabine phosphate, cyclophosphamide/fludarabine phosphate/rituximab, cytarabine/filgrastim/fludarabine phosphate, fludarabine phosphate/rituximab, dexamethasone/fludarabine phosphate/mitoxantrone, alemtuzumab/cyclophosphamide/fludarabine phosphate/rituximab, alemtuzumab/fludarabine phosphate, cytarabine/fludarabine phosphate/oxaliplatin/rituximab, cyclophosphamide/fludarabine phosp…
rs12190422	PRIM2	primase, DNA, polypeptide 2 (58kDa)	Nucleus	enzyme		cytarabine/fludarabine phosphate, cyclophosphamide/fludarabine phosphate/rituximab, cytarabine/filgrastim/fludarabine phosphate, fludarabine phosphate/rituximab, dexamethasone/fludarabine phosphate/mitoxantrone, alemtuzumab/cyclophosphamide/fludarabine phosphate/rituximab, alemtuzumab/fludarabine phosphate, cytarabine/fludarabine phosphate/oxaliplatin/rituximab, cyclophosphamide/fludarabine phosp…
rs6908145	PRIM2	primase, DNA, polypeptide 2 (58kDa)	Nucleus	enzyme		cytarabine/fludarabine phosphate, cyclophosphamide/fludarabine phosphate/rituximab, cytarabine/filgrastim/fludarabine phosphate, fludarabine phosphate/rituximab, dexamethasone/fludarabine phosphate/mitoxantrone, alemtuzumab/cyclophosphamide/fludarabine phosphate/rituximab, alemtuzumab/fludarabine phosphate, cytarabine/fludarabine phosphate/oxaliplatin/rituximab, cyclophosphamide/fludarabine phosp…
rs12201359	PRIM2	primase, DNA, polypeptide 2 (58kDa)	Nucleus	enzyme		cytarabine/fludarabine phosphate, cyclophosphamide/fludarabine phosphate/rituximab, cytarabine/filgrastim/fludarabine phosphate, fludarabine phosphate/rituximab, dexamethasone/fludarabine phosphate/mitoxantrone, alemtuzumab/cyclophosphamide/fludarabine phosphate/rituximab, alemtuzumab/fludarabine phosphate, cytarabine/fludarabine phosphate/oxaliplatin/rituximab, cyclophosphamide/fludarabine phosp…
rs12198315	PRIM2	primase, DNA, polypeptide 2 (58kDa)	Nucleus	enzyme		cytarabine/fludarabine phosphate, cyclophosphamide/fludarabine phosphate/rituximab, cytarabine/filgrastim/fludarabine phosphate, fludarabine phosphate/rituximab, dexamethasone/fludarabine phosphate/mitoxantrone, alemtuzumab/cyclophosphamide/fludarabine phosphate/rituximab, alemtuzumab/fludarabine phosphate, cytarabine/fludarabine phosphate/oxaliplatin/rituximab, cyclophosphamide/fludarabine phosp…
rs3805793	PRIM2	primase, DNA, polypeptide 2 (58kDa)	Nucleus	enzyme		cytarabine/fludarabine phosphate, cyclophosphamide/fludarabine phosphate/rituximab, cytarabine/filgrastim/fludarabine phosphate, fludarabine phosphate/rituximab, dexamethasone/fludarabine phosphate/mitoxantrone, alemtuzumab/cyclophosphamide/fludarabine phosphate/rituximab, alemtuzumab/fludarabine phosphate, cytarabine/fludarabine phosphate/oxaliplatin/rituximab, cyclophosphamide/fludarabine phosp…
rs12210940	PRIM2	primase, DNA, polypeptide 2 (58kDa)	Nucleus	enzyme		cytarabine/fludarabine phosphate, cyclophosphamide/fludarabine phosphate/rituximab, cytarabine/filgrastim/fludarabine phosphate, fludarabine phosphate/rituximab, dexamethasone/fludarabine phosphate/mitoxantrone, alemtuzumab/cyclophosphamide/fludarabine phosphate/rituximab, alemtuzumab/fludarabine phosphate, cytarabine/fludarabine phosphate/oxaliplatin/rituximab, cyclophosphamide/fludarabine phosp…
rs7748620	PRIM2	primase, DNA, polypeptide 2 (58kDa)	Nucleus	enzyme		cytarabine/fludarabine phosphate, cyclophosphamide/fludarabine phosphate/rituximab, cytarabine/filgrastim/fludarabine phosphate, fludarabine phosphate/rituximab, dexamethasone/fludarabine phosphate/mitoxantrone, alemtuzumab/cyclophosphamide/fludarabine phosphate/rituximab, alemtuzumab/fludarabine phosphate, cytarabine/fludarabine phosphate/oxaliplatin/rituximab, cyclophosphamide/fludarabine phosp…
rs2711293	PRKCE	protein kinase C, epsilon	Cytoplasm	kinase	disease progression	protein kinase C-epsilon activator, ingenol mebutate
rs12509049	PTPN13	protein tyrosine phosphatase, non-receptor type 13 (APO-1/CD95 (Fas)-associated phosphatase)	Cytoplasm	phosphatase
rs12509039	PTPN13	protein tyrosine phosphatase, non-receptor type 13 (APO-1/CD95 (Fas)-associated phosphatase)	Cytoplasm	phosphatase
rs12498653	PTPN13	protein tyrosine phosphatase, non-receptor type 13 (APO-1/CD95 (Fas)-associated phosphatase)	Cytoplasm	phosphatase
rs1530930	PTPRN2	protein tyrosine phosphatase, receptor type, N polypeptide 2	Plasma Membrane	phosphatase
rs2425570	PTPRT	protein tyrosine phosphatase, receptor type, T	Plasma Membrane	phosphatase
rs2425572	PTPRT	protein tyrosine phosphatase, receptor type, T	Plasma Membrane	phosphatase
rs2425544	PTPRT	protein tyrosine phosphatase, receptor type, T	Plasma Membrane	phosphatase
rs206163	PTPRT	protein tyrosine phosphatase, receptor type, T	Plasma Membrane	phosphatase
rs6030610	PTPRT	protein tyrosine phosphatase, receptor type, T	Plasma Membrane	phosphatase
rs2425562	PTPRT	protein tyrosine phosphatase, receptor type, T	Plasma Membrane	phosphatase
rs6030613	PTPRT	protein tyrosine phosphatase, receptor type, T	Plasma Membrane	phosphatase
rs3092215	PTPRT	protein tyrosine phosphatase, receptor type, T	Plasma Membrane	phosphatase
rs713108	PTPRT	protein tyrosine phosphatase, receptor type, T	Plasma Membrane	phosphatase
rs3092568	PTPRT	protein tyrosine phosphatase, receptor type, T	Plasma Membrane	phosphatase
rs1106978	PTPRT	protein tyrosine phosphatase, receptor type, T	Plasma Membrane	phosphatase
rs2425567	PTPRT	protein tyrosine phosphatase, receptor type, T	Plasma Membrane	phosphatase
rs2425568	PTPRT	protein tyrosine phosphatase, receptor type, T	Plasma Membrane	phosphatase
rs2425566	PTPRT	protein tyrosine phosphatase, receptor type, T	Plasma Membrane	phosphatase
rs2425563	PTPRT	protein tyrosine phosphatase, receptor type, T	Plasma Membrane	phosphatase
rs910830	PTPRT	protein tyrosine phosphatase, receptor type, T	Plasma Membrane	phosphatase
rs910829	PTPRT	protein tyrosine phosphatase, receptor type, T	Plasma Membrane	phosphatase
rs2425564	PTPRT	protein tyrosine phosphatase, receptor type, T	Plasma Membrane	phosphatase
rs1808536	RAB11B-AS1	RAB11B antisense RNA 1	Other	other
rs9144	RAB38	RAB38, member RAS oncogene family	Cytoplasm	enzyme
rs2364118	RARB	retinoic acid receptor, beta	Nucleus	ligand-dependent nuclear receptor	diagnosis,efficacy,prognosis	etretinate, daunorubicin/tretinoin, idarubicin/tretinoin, doxorubicin/tretinoin, adapalene, isotretinoin, tazarotene, acitretin, tretinoin, tamibarotene, alitretinoin, fenretinide
rs7615918	RARB	retinoic acid receptor, beta	Nucleus	ligand-dependent nuclear receptor	diagnosis,efficacy,prognosis	etretinate, daunorubicin/tretinoin, idarubicin/tretinoin, doxorubicin/tretinoin, adapalene, isotretinoin, tazarotene, acitretin, tretinoin, tamibarotene, alitretinoin, fenretinide
rs322668	RARB	retinoic acid receptor, beta	Nucleus	ligand-dependent nuclear receptor	diagnosis,efficacy,prognosis	etretinate, daunorubicin/tretinoin, idarubicin/tretinoin, doxorubicin/tretinoin, adapalene, isotretinoin, tazarotene, acitretin, tretinoin, tamibarotene, alitretinoin, fenretinide
rs6500949	RBFOX1	RNA binding protein, fox-1 homolog (C. elegans) 1	Cytoplasm	other
rs9467556	SCGN	secretagogin, EF-hand calcium binding protein	Cytoplasm	other
rs7636049	SCN11A	sodium channel, voltage gated, type XI alpha subunit	Plasma Membrane	ion channel		riluzole, zonisamide
rs3798515	SIM1	single-minded family bHLH transcription factor 1	Nucleus	transcription regulator
rs2295595	SIM1	single-minded family bHLH transcription factor 1	Nucleus	transcription regulator
rs972087	SLC17A3	solute carrier family 17 (organic anion transporter), member 3	Plasma Membrane	transporter
rs6902211	SLC17A4	solute carrier family 17, member 4	Plasma Membrane	transporter	unspecified application
rs4712969	SLC17A4	solute carrier family 17, member 4	Plasma Membrane	transporter	unspecified application
rs4236040	SLC17A4	solute carrier family 17, member 4	Plasma Membrane	transporter	unspecified application
rs1892250	SLC17A4	solute carrier family 17, member 4	Plasma Membrane	transporter	unspecified application
rs10860589	SLC17A8	solute carrier family 17 (vesicular glutamate transporter), member 8	Plasma Membrane	transporter
rs6062400	SLCO4A1	solute carrier organic anion transporter family, member 4A1	Plasma Membrane	transporter
rs16927597	SOX5	SRY (sex determining region Y)-box 5	Nucleus	transcription regulator
rs10771087	SOX5	SRY (sex determining region Y)-box 5	Nucleus	transcription regulator
rs11534741	SOX5	SRY (sex determining region Y)-box 5	Nucleus	transcription regulator
rs6719211	SRBD1	S1 RNA binding domain 1	Other	other
rs11929259	SRGAP3	SLIT-ROBO Rho GTPase activating protein 3	Cytoplasm	other
rs1657890	STARD6	StAR-related lipid transfer (START) domain containing 6	Other	transporter
rs2488683	SVIL	supervillin	Plasma Membrane	other
rs2505899	SVIL	supervillin	Plasma Membrane	other
rs2505898	SVIL	supervillin	Plasma Membrane	other
rs2505900	SVIL	supervillin	Plasma Membrane	other
rs2488682	SVIL	supervillin	Plasma Membrane	other
rs7273659	TAF4	TAF4 RNA polymerase II, TATA box binding protein (TBP)-associated factor, 135kDa	Nucleus	transcription regulator
rs8121843	TAF4	TAF4 RNA polymerase II, TATA box binding protein (TBP)-associated factor, 135kDa	Nucleus	transcription regulator
rs6061952	TAF4	TAF4 RNA polymerase II, TATA box binding protein (TBP)-associated factor, 135kDa	Nucleus	transcription regulator
rs3821301	TANC1	tetratricopeptide repeat, ankyrin repeat and coiled-coil containing 1	Plasma Membrane	other
rs2288111	TANC1	tetratricopeptide repeat, ankyrin repeat and coiled-coil containing 1	Plasma Membrane	other
rs2042495	TANC1	tetratricopeptide repeat, ankyrin repeat and coiled-coil containing 1	Plasma Membrane	other
rs2042494	TANC1	tetratricopeptide repeat, ankyrin repeat and coiled-coil containing 1	Plasma Membrane	other
rs13022357	TANC1	tetratricopeptide repeat, ankyrin repeat and coiled-coil containing 1	Plasma Membrane	other
rs828872	TET3	tet methylcytosine dioxygenase 3	Nucleus	other
rs4807650	TICAM1	toll-like receptor adaptor molecule 1	Nucleus	other
rs842360	TMEM163	transmembrane protein 163	Cytoplasm	other
rs842358	TMEM163	transmembrane protein 163	Cytoplasm	other
rs7955592	TMTC1	transmembrane and tetratricopeptide repeat containing 1	Cytoplasm	other
rs17527406	UQCC2	ubiquinol-cytochrome c reductase complex assembly factor 2	Cytoplasm	other
