# Supplementary material for: The complex genetics of gait speed: genome-wide meta-analysis approach
Source: Aging (Albany NY). 2017 Jan 10;9(1):209–46. doi: 10.18632/aging.101151 (PMC5310665; doi:10.18632/aging.101151)
Supplement: Supplementary file 7 [file aging-09-0209-s007.xlsx]

## Sheet: Sheet0
Network classifcation
ID	Molecules in Network	Score	Focus Molecules	Top Diseases and Functions
1	Actin,ARHGAP8/PRR5-ARHGAP8,B4GALT1,CADM1,caspase,CD3,DNAJC13,ERK,ERK1/2,GABRA1,Hsp90,IFN alpha/beta,IgG,IgG1,IgG2a,Igm,IL12 (complex),IL12 (family),Interferon alpha,Jnk,LYN,MAVS,NCALD,NFkB (complex),PHACTR1,PI3K (complex),POLI,PRKCE,PTPN13,SCGN,SOX5,SRC (family),SVIL,TICAM1,Ubiquitin	35	16	Cancer, Gastrointestinal Disease, Organismal Injury and Abnormalities
2	ADCYAP1,Akt,ANGPT4,ATP8A2,BTN1A1,CCBE1,CD151,CDH13,CRTAC1,ethylene glycol,GRAMD1C,homocysteine,HOXD10,KIAA1211,MAP3K8,Mapk,MAPK10,NEK10,NT3,NTRK1,Obox4,PDZRN3,Peg3,Plc delta,Selectin,SLC17A3,SLCO4A1,SPRED3,SRBD1,STARD6,STUB1,TANC1,TET3,TSHZ1,Vegf	24	12	Neurological Disease, Cell Morphology, Cellular Function and Maintenance
3	AIFM2,AIM1L,AKT2,APLP1,ASTN1,ASTN2,BTBD10,CNTN5,DUSP26,FAM126A,Fcrls,GPD1,IKBKE,IL4,L-dopa,L-glutamic acid,MDGA2,MIR155HG,MSRB1,NEBL,PARM1,PRIM2,PTPRT,SLC17A,SLC17A8,SLC22A17,SLC8B1,TMTC1,TP53,TRIM6,UBL3,UFSP1,UQCC2,ZNF385B,ZYX	21	11	Amino Acid Metabolism, Small Molecule Biochemistry, Cancer
4	ADAT1,AKIRIN1,AR,C5orf51,C9orf64,COQ10B,CTDSPL,DISP2,DRAM2,DZANK1,ELAVL1,EPHA10,GALNT18,GUCA2A,HNF4A,IRX1,LMOD1,MTRF1,MYOD1,PDX1,PRELID3B,Proinsulin,PTPRN2,RAB38,SMAD2,SMIM7,SMIM12,TAF4,TCF7L2,TFCP2,TM9SF4,TMEM101,TMEM163,TMEM216,TRMT12	19	10	Tissue Morphology, Cellular Development, Gene Expression
5	ABCA7,APP,ARHGAP27,ARHGAP39,ARHGAP44,BDNF,CACNG3,CARF,CDC42,CDC42BPG,CEP112,EZH2,FHOD3,GSDMB,H2-K2/H2-Q9,H2-M10.1 (includes others),HLA-DPB1,INPP5A,JAK2,KCNE5,KNG1,NECAB3,PDE1A,PRSS12,RAC1,Rac/Cdc42,RBFOX1,S100A9,SCN11A,SH3RF3,SIM1,srGAP,SRGAP3,Wave,ZDHHC14	18	10	Cell-To-Cell Signaling and Interaction, Nervous System Development and Function, Cellular Assembly and Organization
