# Supplementary material for: The complex genetics of gait speed: genome-wide meta-analysis approach
Source: Aging (Albany NY). 2017 Jan 10;9(1):209–46. doi: 10.18632/aging.101151 (PMC5310665; doi:10.18632/aging.101151)
Supplement: Supplementary file 8 [file aging-09-0209-s008.xlsx]

## Sheet: eqtl all
eQTL analysis
SNPid	Chr	BP	Tissue	eSNP.p	ArrayID	Transcript	IsCis?	r2 (ColA to ColK)	D' (ColA to ColK)	BestESnp	BestESnp.p	Array_ID	Transcript1	IsCis?
rs17164349	4	1118928	Peripheral blood mononuclear cells [PMID 26019233]	0.000154	ILMN_1805271	ABCA11P	cis	NotFnd	NotFnd	rs13102358	5.86e-136	ILMN_1805271	ABCA11P	cis
rs17164350	4	1121941	Peripheral blood mononuclear cells [PMID 26019233]	0.000154	ILMN_1805271	ABCA11P	cis	NotFnd	NotFnd	rs13102358	5.86e-136	ILMN_1805271	ABCA11P	cis
rs17164353	4	1122837	Peripheral blood mononuclear cells [PMID 26019233]	0.000154	ILMN_1805271	ABCA11P	cis	NotFnd	NotFnd	rs13102358	5.86e-136	ILMN_1805271	ABCA11P	cis
rs2127910	4	1157975	Peripheral blood mononuclear cells [PMID 26019233]	0.000154	ILMN_1805271	ABCA11P	cis	NotFnd	NotFnd	rs13102358	5.86e-136	ILMN_1805271	ABCA11P	cis
rs17164346	4	1117178	Peripheral blood mononuclear cells [PMID 26019233]	0.000161	ILMN_1805271	ABCA11P	cis	NotFnd	NotFnd	rs13102358	5.86e-136	ILMN_1805271	ABCA11P	cis
rs13194053	6	27176103	Peripheral blood mononuclear cells [PMID 26019233]	8.46e-06	ILMN_1658083	ABT1	cis	NotFnd	NotFnd	rs4437460	3.68e-23	ILMN_1658083	ABT1	cis
rs6904071	6	27079476	Peripheral blood mononuclear cells [PMID 26019233]	8.49e-06	ILMN_1658083	ABT1	cis	NotFnd	NotFnd	rs4437460	3.68e-23	ILMN_1658083	ABT1	cis
rs13219181	6	27168445	Peripheral blood mononuclear cells [PMID 26019233]	9.64e-06	ILMN_1658083	ABT1	cis	NotFnd	NotFnd	rs4437460	3.68e-23	ILMN_1658083	ABT1	cis
rs6913660	6	27123645	Peripheral blood mononuclear cells [PMID 26019233]	1.02e-05	ILMN_1658083	ABT1	cis	NotFnd	NotFnd	rs4437460	3.68e-23	ILMN_1658083	ABT1	cis
rs926300	6	27091663	Peripheral blood mononuclear cells [PMID 26019233]	1.03e-05	ILMN_1658083	ABT1	cis	NotFnd	NotFnd	rs4437460	3.68e-23	ILMN_1658083	ABT1	cis
rs6938200	6	27263370	Peripheral blood mononuclear cells [PMID 26019233]	3.42e-05	ILMN_1658083	ABT1	cis	NotFnd	NotFnd	rs4437460	3.68e-23	ILMN_1658083	ABT1	cis
rs13194053	6	27176103	CD14+ monocytes (IFNg stimulated) [PMID 24604202]	4.48e-05	6480392	ABT1	cis	NotFnd	NotFnd	rs12204145	2.16e-09	6480392	ABT1	cis
rs3800307	6	27218012	Peripheral blood mononuclear cells [PMID 26019233]	4.52e-05	ILMN_1658083	ABT1	cis	NotFnd	NotFnd	rs4437460	3.68e-23	ILMN_1658083	ABT1	cis
rs6904071	6	27079476	CD14+ monocytes (IFNg stimulated) [PMID 24604202]	6.94e-05	6480392	ABT1	cis	0.033	1	rs12204145	2.16e-09	6480392	ABT1	cis
rs6913660	6	27123645	CD14+ monocytes (IFNg stimulated) [PMID 24604202]	6.94e-05	6480392	ABT1	cis	0.033	1	rs12204145	2.16e-09	6480392	ABT1	cis
rs13194053	6	27176103	CD14+ monocytes (untreated) [PMID 24604202]	0.000225	6480392	ABT1	cis	NotFnd	NotFnd	rs3873182	1.26e-06	6480392	ABT1	cis
rs6904071	6	27079476	CD14+ monocytes (untreated) [PMID 24604202]	0.000351	6480392	ABT1	cis	NotFnd	NotFnd	rs3873182	1.26e-06	6480392	ABT1	cis
rs6913660	6	27123645	CD14+ monocytes (untreated) [PMID 24604202]	0.000351	6480392	ABT1	cis	NotFnd	NotFnd	rs3873182	1.26e-06	6480392	ABT1	cis
rs13207082	6	27283599	CD14+ monocytes (untreated) [PMID 24604202]	0.00064	6480392	ABT1	cis	NotFnd	NotFnd	rs3873182	1.26e-06	6480392	ABT1	cis
rs13207082	6	27283599	Peripheral blood mononuclear cells [PMID 26019233]	1.97e-08	ILMN_1738921	ACAA1	trans	NotFnd	NotFnd	rs9258593	1.46e-33	ILMN_1738921	ACAA1	trans
rs4714870	6	12796822	Prefrontal cortex (all samples) [PMID 23622250]	2.15e-15	10023836273	AF085859	cis	SameSNP	SameSNP	rs4714870	2.15e-15	10023836273	AF085859	cis
rs4714870	6	12796822	Prefrontal cortex (Alzheimer's) [PMID 23622250]	3.47e-10	10023836273	AF085859	cis	SameSNP	SameSNP	rs4714870	3.47e-10	10023836273	AF085859	cis
rs4714870	6	12796822	Prefrontal cortex (normal samples) [PMID 23622250]	2.48e-07	10023836273	AF085859	cis	SameSNP	SameSNP	rs4714870	2.48e-07	10023836273	AF085859	cis
rs4714870	6	12796822	Visual cortex (all samples) [PMID 23622250]	0.00107	10023836273	AF085859	cis	SameSNP	SameSNP	rs4714870	0.00107	10023836273	AF085859	cis
rs7763822	6	33092650	Peripheral blood mononuclear cells [PMID 26019233]	0.000956	ILMN_1679520	AGPAT1	cis	NotFnd	NotFnd	rs28732175	7.97e-29	ILMN_1679520	AGPAT1	cis
rs9501255	6	33087320	Peripheral blood mononuclear cells [PMID 26019233]	0.00101	ILMN_1679520	AGPAT1	cis	NotFnd	NotFnd	rs28732175	7.97e-29	ILMN_1679520	AGPAT1	cis
rs3749985	6	33086655	Peripheral blood mononuclear cells [PMID 26019233]	0.00103	ILMN_1679520	AGPAT1	cis	NotFnd	NotFnd	rs28732175	7.97e-29	ILMN_1679520	AGPAT1	cis
rs9501263	6	33089573	Peripheral blood mononuclear cells [PMID 26019233]	0.00113	ILMN_1679520	AGPAT1	cis	NotFnd	NotFnd	rs28732175	7.97e-29	ILMN_1679520	AGPAT1	cis
rs9469357	6	33106839	Peripheral blood mononuclear cells [PMID 26019233]	0.00166	ILMN_1679520	AGPAT1	cis	NotFnd	NotFnd	rs28732175	7.97e-29	ILMN_1679520	AGPAT1	cis
rs1190715	14	101556741	Whole blood (Wright, n=4,647) [PMID 24728292]	0.0299	11745199_x_at	ANKRD9	cis	NotFnd	NotFnd	rs141464764	7.84e-05	11745199_x_at	ANKRD9	trans
rs367645	6	33056721	Liver (ScanDB)	8.04e-08		APC2	cis	NotFnd	NotFnd	rs12436509	2.2e-10		APC2	cis
rs10511909	9	33132519	Peripheral blood mononuclear cells [PMID 26019233]	6.57e-07	ILMN_2317348	APTX	cis	0.059	0.729	rs20583	2.88e-38	ILMN_2317348	APTX	cis
rs10511909	9	33132519	Peripheral blood mononuclear cells [PMID 26019233]	0.000203	ILMN_1726752	APTX	cis	0.059	0.729	rs20583	2.88e-38	ILMN_2317348	APTX	cis
rs12562454	1	26344592	Peripheral blood mononuclear cells [PMID 26019233]	0.00034	ILMN_1797341	ARID1A	cis	0.001	0.234	rs12685	2.72e-125	ILMN_1797341	ARID1A	cis
rs11247921	1	26339110	Peripheral blood mononuclear cells [PMID 26019233]	0.00279	ILMN_1797341	ARID1A	cis	0.001	0.234	rs12685	2.72e-125	ILMN_1797341	ARID1A	cis
rs1765259	15	79573874	3 tissue meta-analysis (PBMC in eczema families, LCL from asthma families, normal skin) [PMID 25951796]	0.00253	213138_at	ARID5A	trans	SameSNP	SameSNP	rs1765259	0.00253	213138_at	ARID5A	trans
rs11861812	16	83439507	Peripheral blood mononuclear cells [PMID 26019233]	0.00218	ILMN_1785413	ATP2C2	cis	0.522	1	rs7196353	0.000409	ILMN_1785413	ATP2C2	cis
rs10511909	9	33132519	Peripheral blood mononuclear cells [PMID 26019233]	1.38e-15	ILMN_1766221	B4GALT1	cis	0.011	1	rs7850948	7.75e-47	ILMN_1766221	B4GALT1	cis
rs2846861	11	65454833	Peripheral blood mononuclear cells [PMID 26019233]	0.000889	ILMN_1749243	BANF1	cis	NotFnd	NotFnd	rs14157	7.62e-36	ILMN_1749243	BANF1	cis
rs1784859	11	65453277	Peripheral blood mononuclear cells [PMID 26019233]	0.000915	ILMN_1749243	BANF1	cis	NotFnd	NotFnd	rs14157	7.62e-36	ILMN_1749243	BANF1	cis
rs1626021	11	65458715	Peripheral blood mononuclear cells [PMID 26019233]	0.00104	ILMN_1749243	BANF1	cis	NotFnd	NotFnd	rs14157	7.62e-36	ILMN_1749243	BANF1	cis
rs10766081	11	13414235	Peripheral blood mononuclear cells [PMID 26019233]	5.86e-55	ILMN_1809344	BTBD10	cis	0.25	1	rs969486	6.45e-59	ILMN_1809344	BTBD10	cis
rs10832034	11	13436410	Peripheral blood mononuclear cells [PMID 26019233]	1.67e-54	ILMN_1809344	BTBD10	cis	0.278	1	rs969486	6.45e-59	ILMN_1809344	BTBD10	cis
rs986001	11	13449633	Peripheral blood mononuclear cells [PMID 26019233]	1.67e-54	ILMN_1809344	BTBD10	cis	0.225	0.858	rs969486	6.45e-59	ILMN_1809344	BTBD10	cis
rs7948130	11	13602541	Peripheral blood mononuclear cells [PMID 26019233]	6.99e-53	ILMN_1809344	BTBD10	cis	0.181	0.737	rs969486	6.45e-59	ILMN_1809344	BTBD10	cis
rs13207082	6	27283599	CD14+ monocytes (24h LPS stimulated) [PMID 24604202]	2.27e-07	2570477	BTN2A1	cis	NotFnd	NotFnd	rs9295690	5.19e-16	2570477	BTN2A1	cis
rs2893910	6	27315474	CD14+ monocytes (24h LPS stimulated) [PMID 24604202]	4.91e-07	2570477	BTN2A1	cis	NotFnd	NotFnd	rs9295690	5.19e-16	2570477	BTN2A1	cis
rs7746199	6	27293544	CD14+ monocytes (24h LPS stimulated) [PMID 24604202]	5.25e-07	2570477	BTN2A1	cis	NotFnd	NotFnd	rs9295690	5.19e-16	2570477	BTN2A1	cis
rs13207082	6	27283599	CD14+ monocytes (IFNg stimulated) [PMID 24604202]	3.95e-06	2570477	BTN2A1	cis	NotFnd	NotFnd	rs9467759	3.05e-10	2570477	BTN2A1	cis
rs2893910	6	27315474	CD14+ monocytes (2h LPS stimulated) [PMID 24604202]	6.81e-06	2570477	BTN2A1	cis	NotFnd	NotFnd	rs9295690	6.14e-22	2570477	BTN2A1	cis
rs7746199	6	27293544	CD14+ monocytes (2h LPS stimulated) [PMID 24604202]	9.48e-06	2570477	BTN2A1	cis	NotFnd	NotFnd	rs9295690	6.14e-22	2570477	BTN2A1	cis
rs13207082	6	27283599	CD14+ monocytes (2h LPS stimulated) [PMID 24604202]	4.9e-05	2570477	BTN2A1	cis	NotFnd	NotFnd	rs9295690	6.14e-22	2570477	BTN2A1	cis
rs13207082	6	27283599	Bcells (CD19+) [PMID 22446964]	1.75e-05	9km6V60xMG0SVKIOo0	BTN2A2	cis	NotFnd	NotFnd	rs13199772	4.07e-06	9km6V60xMG0SVKIOo0	BTN2A2	cis
rs1892250	6	25768795	Bcells (CD19+) [PMID 22446964]	0.000163	9km6V60xMG0SVKIOo0	BTN2A2	cis	NotFnd	NotFnd	rs13199772	4.07e-06	9km6V60xMG0SVKIOo0	BTN2A2	cis
rs13207082	6	27283599	Peripheral blood mononuclear cells [PMID 26019233]	2.49e-260	ILMN_1676528	BTN3A2	cis	NotFnd	NotFnd	rs9366653	0	ILMN_1676528	BTN3A2	cis
rs1892250	6	25768795	Peripheral blood mononuclear cells [PMID 26019233]	6.23e-157	ILMN_1676528	BTN3A2	cis	NotFnd	NotFnd	rs9366653	0	ILMN_1676528	BTN3A2	cis
rs6902211	6	25767208	Peripheral blood mononuclear cells [PMID 26019233]	2.84e-154	ILMN_1676528	BTN3A2	cis	NotFnd	NotFnd	rs9366653	0	ILMN_1676528	BTN3A2	cis
rs4712969	6	25763963	Peripheral blood mononuclear cells [PMID 26019233]	3.65e-154	ILMN_1676528	BTN3A2	cis	NotFnd	NotFnd	rs9366653	0	ILMN_1676528	BTN3A2	cis
rs4236040	6	25760980	Peripheral blood mononuclear cells [PMID 26019233]	4.7e-154	ILMN_1676528	BTN3A2	cis	NotFnd	NotFnd	rs9366653	0	ILMN_1676528	BTN3A2	cis
rs972087	6	25872350	Peripheral blood mononuclear cells [PMID 26019233]	1.98e-152	ILMN_1676528	BTN3A2	cis	0.606	0.778	rs9366653	0	ILMN_1676528	BTN3A2	cis
rs13207082	6	27283599	Peripheral blood mononuclear cells [PMID 26019233]	8.37e-137	ILMN_1700067	BTN3A2	cis	NotFnd	NotFnd	rs9366653	0	ILMN_1676528	BTN3A2	cis
rs16897515	6	27310240	Peripheral blood mononuclear cells [PMID 26019233]	3.97e-105	ILMN_1676528	BTN3A2	cis	NotFnd	NotFnd	rs9366653	0	ILMN_1676528	BTN3A2	cis
rs7746199	6	27293544	Peripheral blood mononuclear cells [PMID 26019233]	1.86e-102	ILMN_1676528	BTN3A2	cis	NotFnd	NotFnd	rs9366653	0	ILMN_1676528	BTN3A2	cis
rs3800318	6	27295861	Peripheral blood mononuclear cells [PMID 26019233]	1.62e-100	ILMN_1676528	BTN3A2	cis	NotFnd	NotFnd	rs9366653	0	ILMN_1676528	BTN3A2	cis
rs2893910	6	27315474	Peripheral blood mononuclear cells [PMID 26019233]	1.21e-98	ILMN_1676528	BTN3A2	cis	NotFnd	NotFnd	rs9366653	0	ILMN_1676528	BTN3A2	cis
rs13207082	6	27283599	Monocytes [PMID 20502693]	1.05e-87		BTN3A2	cis	NotFnd	NotFnd	rs9379851	2.98e-154		BTN3A2	cis
rs13211166	6	27298160	Peripheral blood mononuclear cells [PMID 26019233]	9.5e-85	ILMN_1676528	BTN3A2	cis	NotFnd	NotFnd	rs9366653	0	ILMN_1676528	BTN3A2	cis
rs1892250	6	25768795	Peripheral blood mononuclear cells [PMID 26019233]	1.05e-81	ILMN_1700067	BTN3A2	cis	NotFnd	NotFnd	rs9366653	0	ILMN_1676528	BTN3A2	cis
rs972087	6	25872350	Peripheral blood mononuclear cells [PMID 26019233]	1.22e-80	ILMN_1700067	BTN3A2	cis	0.606	0.778	rs9366653	0	ILMN_1676528	BTN3A2	cis
rs6902211	6	25767208	Peripheral blood mononuclear cells [PMID 26019233]	2.09e-80	ILMN_1700067	BTN3A2	cis	NotFnd	NotFnd	rs9366653	0	ILMN_1676528	BTN3A2	cis
rs4712969	6	25763963	Peripheral blood mononuclear cells [PMID 26019233]	2.36e-80	ILMN_1700067	BTN3A2	cis	NotFnd	NotFnd	rs9366653	0	ILMN_1676528	BTN3A2	cis
rs4236040	6	25760980	Peripheral blood mononuclear cells [PMID 26019233]	2.65e-80	ILMN_1700067	BTN3A2	cis	NotFnd	NotFnd	rs9366653	0	ILMN_1676528	BTN3A2	cis
rs13194053	6	27176103	Peripheral blood mononuclear cells [PMID 26019233]	1.71e-78	ILMN_1676528	BTN3A2	cis	NotFnd	NotFnd	rs9366653	0	ILMN_1676528	BTN3A2	cis
rs13219181	6	27168445	Peripheral blood mononuclear cells [PMID 26019233]	3.79e-77	ILMN_1676528	BTN3A2	cis	NotFnd	NotFnd	rs9366653	0	ILMN_1676528	BTN3A2	cis
rs926300	6	27091663	Peripheral blood mononuclear cells [PMID 26019233]	4.05e-77	ILMN_1676528	BTN3A2	cis	NotFnd	NotFnd	rs9366653	0	ILMN_1676528	BTN3A2	cis
rs6913660	6	27123645	Peripheral blood mononuclear cells [PMID 26019233]	4.87e-77	ILMN_1676528	BTN3A2	cis	NotFnd	NotFnd	rs9366653	0	ILMN_1676528	BTN3A2	cis
rs6904071	6	27079476	Peripheral blood mononuclear cells [PMID 26019233]	2.96e-75	ILMN_1676528	BTN3A2	cis	NotFnd	NotFnd	rs9366653	0	ILMN_1676528	BTN3A2	cis
rs3800307	6	27218012	Peripheral blood mononuclear cells [PMID 26019233]	5.96e-63	ILMN_1676528	BTN3A2	cis	NotFnd	NotFnd	rs9366653	0	ILMN_1676528	BTN3A2	cis
rs4712969	6	25763963	Monocytes [PMID 20502693]	9.65e-63		BTN3A2	cis	NotFnd	NotFnd	rs9379851	2.98e-154		BTN3A2	cis
rs6938200	6	27263370	Peripheral blood mononuclear cells [PMID 26019233]	2.09e-58	ILMN_1676528	BTN3A2	cis	NotFnd	NotFnd	rs9366653	0	ILMN_1676528	BTN3A2	cis
rs16897515	6	27310240	Peripheral blood mononuclear cells [PMID 26019233]	1.55e-57	ILMN_1700067	BTN3A2	cis	NotFnd	NotFnd	rs9366653	0	ILMN_1676528	BTN3A2	cis
rs7746199	6	27293544	Peripheral blood mononuclear cells [PMID 26019233]	3.3e-57	ILMN_1700067	BTN3A2	cis	NotFnd	NotFnd	rs9366653	0	ILMN_1676528	BTN3A2	cis
rs3800318	6	27295861	Peripheral blood mononuclear cells [PMID 26019233]	2.18e-56	ILMN_1700067	BTN3A2	cis	NotFnd	NotFnd	rs9366653	0	ILMN_1676528	BTN3A2	cis
rs2893910	6	27315474	Peripheral blood mononuclear cells [PMID 26019233]	4.22e-55	ILMN_1700067	BTN3A2	cis	NotFnd	NotFnd	rs9366653	0	ILMN_1676528	BTN3A2	cis
rs13207082	6	27283599	LCL in asthmatics (Liang 1kg) [PMID 23345460]	2.58e-50	209846_s_at	BTN3A2	cis	NotFnd	NotFnd	rs9348712	2.97e-87	209846_s_at	BTN3A2	cis
rs13211166	6	27298160	Peripheral blood mononuclear cells [PMID 26019233]	1.97e-47	ILMN_1700067	BTN3A2	cis	NotFnd	NotFnd	rs9366653	0	ILMN_1676528	BTN3A2	cis
rs13207082	6	27283599	LCL in asthmatics (Liang 1kg) [PMID 23345460]	3.04e-46	212613_at	BTN3A2	cis	NotFnd	NotFnd	rs9348712	2.97e-87	209846_s_at	BTN3A2	cis
rs16897515	6	27310240	Monocytes [PMID 20502693]	2.68e-45		BTN3A2	cis	NotFnd	NotFnd	rs9379851	2.98e-154		BTN3A2	cis
rs7746199	6	27293544	Monocytes [PMID 20502693]	8.01e-43		BTN3A2	cis	NotFnd	NotFnd	rs9379851	2.98e-154		BTN3A2	cis
rs13194053	6	27176103	Peripheral blood mononuclear cells [PMID 26019233]	5.44e-39	ILMN_1700067	BTN3A2	cis	NotFnd	NotFnd	rs9366653	0	ILMN_1676528	BTN3A2	cis
rs13219181	6	27168445	Peripheral blood mononuclear cells [PMID 26019233]	2.08e-38	ILMN_1700067	BTN3A2	cis	NotFnd	NotFnd	rs9366653	0	ILMN_1676528	BTN3A2	cis
rs926300	6	27091663	Peripheral blood mononuclear cells [PMID 26019233]	2.63e-38	ILMN_1700067	BTN3A2	cis	NotFnd	NotFnd	rs9366653	0	ILMN_1676528	BTN3A2	cis
rs6913660	6	27123645	Peripheral blood mononuclear cells [PMID 26019233]	2.65e-38	ILMN_1700067	BTN3A2	cis	NotFnd	NotFnd	rs9366653	0	ILMN_1676528	BTN3A2	cis
rs6904071	6	27079476	Peripheral blood mononuclear cells [PMID 26019233]	9.13e-37	ILMN_1700067	BTN3A2	cis	NotFnd	NotFnd	rs9366653	0	ILMN_1676528	BTN3A2	cis
rs3800307	6	27218012	Peripheral blood mononuclear cells [PMID 26019233]	3.76e-35	ILMN_1700067	BTN3A2	cis	NotFnd	NotFnd	rs9366653	0	ILMN_1676528	BTN3A2	cis
rs6938200	6	27263370	Peripheral blood mononuclear cells [PMID 26019233]	1.77e-33	ILMN_1700067	BTN3A2	cis	NotFnd	NotFnd	rs9366653	0	ILMN_1676528	BTN3A2	cis
rs972087	6	25872350	LCL in asthmatics (Liang 1kg) [PMID 23345460]	1.81e-32	209846_s_at	BTN3A2	cis	0.606	0.778	rs9348712	2.97e-87	209846_s_at	BTN3A2	cis
rs972087	6	25872350	LCL in asthmatics (Liang 1kg) [PMID 23345460]	1.07e-31	212613_at	BTN3A2	cis	0.606	0.778	rs9348712	2.97e-87	209846_s_at	BTN3A2	cis
rs4236040	6	25760980	LCL in asthmatics (Liang 1kg) [PMID 23345460]	2.52e-31	209846_s_at	BTN3A2	cis	NotFnd	NotFnd	rs9348712	2.97e-87	209846_s_at	BTN3A2	cis
rs6902211	6	25767208	LCL in asthmatics (Liang 1kg) [PMID 23345460]	4.42e-31	209846_s_at	BTN3A2	cis	NotFnd	NotFnd	rs9348712	2.97e-87	209846_s_at	BTN3A2	cis
rs1892250	6	25768795	LCL in asthmatics (Liang 1kg) [PMID 23345460]	4.53e-31	209846_s_at	BTN3A2	cis	NotFnd	NotFnd	rs9348712	2.97e-87	209846_s_at	BTN3A2	cis
rs4236040	6	25760980	LCL in asthmatics (Liang 1kg) [PMID 23345460]	3.05e-30	212613_at	BTN3A2	cis	NotFnd	NotFnd	rs9348712	2.97e-87	209846_s_at	BTN3A2	cis
rs6902211	6	25767208	LCL in asthmatics (Liang 1kg) [PMID 23345460]	6.17e-30	212613_at	BTN3A2	cis	NotFnd	NotFnd	rs9348712	2.97e-87	209846_s_at	BTN3A2	cis
rs1892250	6	25768795	LCL in asthmatics (Liang 1kg) [PMID 23345460]	6.74e-30	212613_at	BTN3A2	cis	NotFnd	NotFnd	rs9348712	2.97e-87	209846_s_at	BTN3A2	cis
rs6938200	6	27263370	Monocytes [PMID 20502693]	1.99e-28		BTN3A2	cis	NotFnd	NotFnd	rs9379851	2.98e-154		BTN3A2	cis
rs3800307	6	27218012	Monocytes [PMID 20502693]	3.12e-27		BTN3A2	cis	NotFnd	NotFnd	rs9379851	2.98e-154		BTN3A2	cis
rs6913660	6	27123645	LCL in asthmatics (Liang 1kg) [PMID 23345460]	3.14e-27	209846_s_at	BTN3A2	cis	NotFnd	NotFnd	rs9348712	2.97e-87	209846_s_at	BTN3A2	cis
rs13194053	6	27176103	LCL in asthmatics (Liang 1kg) [PMID 23345460]	7.9e-27	209846_s_at	BTN3A2	cis	NotFnd	NotFnd	rs9348712	2.97e-87	209846_s_at	BTN3A2	cis
rs13219181	6	27168445	LCL in asthmatics (Liang 1kg) [PMID 23345460]	9.7e-27	209846_s_at	BTN3A2	cis	NotFnd	NotFnd	rs9348712	2.97e-87	209846_s_at	BTN3A2	cis
rs926300	6	27091663	LCL in asthmatics (Liang 1kg) [PMID 23345460]	2.19e-26	209846_s_at	BTN3A2	cis	NotFnd	NotFnd	rs9348712	2.97e-87	209846_s_at	BTN3A2	cis
rs6904071	6	27079476	LCL in asthmatics (Liang 1kg) [PMID 23345460]	2.31e-26	209846_s_at	BTN3A2	cis	NotFnd	NotFnd	rs9348712	2.97e-87	209846_s_at	BTN3A2	cis
rs6913660	6	27123645	LCL in asthmatics (Liang 1kg) [PMID 23345460]	1.95e-25	212613_at	BTN3A2	cis	NotFnd	NotFnd	rs9348712	2.97e-87	209846_s_at	BTN3A2	cis
rs13194053	6	27176103	LCL in asthmatics (Liang 1kg) [PMID 23345460]	5e-25	212613_at	BTN3A2	cis	NotFnd	NotFnd	rs9348712	2.97e-87	209846_s_at	BTN3A2	cis
rs13219181	6	27168445	LCL in asthmatics (Liang 1kg) [PMID 23345460]	6.06e-25	212613_at	BTN3A2	cis	NotFnd	NotFnd	rs9348712	2.97e-87	209846_s_at	BTN3A2	cis
rs926300	6	27091663	LCL in asthmatics (Liang 1kg) [PMID 23345460]	1.28e-24	212613_at	BTN3A2	cis	NotFnd	NotFnd	rs9348712	2.97e-87	209846_s_at	BTN3A2	cis
rs6904071	6	27079476	LCL in asthmatics (Liang 1kg) [PMID 23345460]	1.35e-24	212613_at	BTN3A2	cis	NotFnd	NotFnd	rs9348712	2.97e-87	209846_s_at	BTN3A2	cis
rs6938200	6	27263370	LCL in asthmatics (Liang 1kg) [PMID 23345460]	3.85e-22	209846_s_at	BTN3A2	cis	NotFnd	NotFnd	rs9348712	2.97e-87	209846_s_at	BTN3A2	cis
rs2893910	6	27315474	LCL in asthmatics (Liang 1kg) [PMID 23345460]	2.45e-21	209846_s_at	BTN3A2	cis	NotFnd	NotFnd	rs9348712	2.97e-87	209846_s_at	BTN3A2	cis
rs7746199	6	27293544	LCL in asthmatics (Liang 1kg) [PMID 23345460]	2.57e-21	209846_s_at	BTN3A2	cis	NotFnd	NotFnd	rs9348712	2.97e-87	209846_s_at	BTN3A2	cis
rs3800318	6	27295861	LCL in asthmatics (Liang 1kg) [PMID 23345460]	2.68e-21	209846_s_at	BTN3A2	cis	NotFnd	NotFnd	rs9348712	2.97e-87	209846_s_at	BTN3A2	cis
rs13211166	6	27298160	LCL in asthmatics (Liang 1kg) [PMID 23345460]	2.95e-21	209846_s_at	BTN3A2	cis	NotFnd	NotFnd	rs9348712	2.97e-87	209846_s_at	BTN3A2	cis
rs6938200	6	27263370	LCL in asthmatics (Liang 1kg) [PMID 23345460]	3.84e-21	212613_at	BTN3A2	cis	NotFnd	NotFnd	rs9348712	2.97e-87	209846_s_at	BTN3A2	cis
rs7746199	6	27293544	LCL in asthmatics (Liang 1kg) [PMID 23345460]	1.32e-19	212613_at	BTN3A2	cis	NotFnd	NotFnd	rs9348712	2.97e-87	209846_s_at	BTN3A2	cis
rs3800318	6	27295861	LCL in asthmatics (Liang 1kg) [PMID 23345460]	1.38e-19	212613_at	BTN3A2	cis	NotFnd	NotFnd	rs9348712	2.97e-87	209846_s_at	BTN3A2	cis
rs2893910	6	27315474	LCL in asthmatics (Liang 1kg) [PMID 23345460]	1.38e-19	212613_at	BTN3A2	cis	NotFnd	NotFnd	rs9348712	2.97e-87	209846_s_at	BTN3A2	cis
rs13211166	6	27298160	LCL in asthmatics (Liang 1kg) [PMID 23345460]	1.55e-19	212613_at	BTN3A2	cis	NotFnd	NotFnd	rs9348712	2.97e-87	209846_s_at	BTN3A2	cis
rs6904071	6	27079476	Whole blood (PAX) in breast cancer survivors [PMID 23880221]	2.21e-14	4920577	BTN3A2	cis	NotFnd	NotFnd	rs4712981	2.63e-54	4920577	BTN3A2	cis
rs13207082	6	27283599	Whole blood(Gtex,n=168)	7.2e-14		BTN3A2	cis	NotFnd	NotFnd	rs28551159	1.73e-24		BTN3A2	cis
rs6913660	6	27123645	LCL [PMID 17873877]	1.5e-13	209846_s_at	BTN3A2	cis	NotFnd	NotFnd	rs9379858	2.3e-28	209846_s_at	BTN3A2	cis
rs7746199	6	27293544	LCL [PMID 17873877]	3.9e-11	209846_s_at	BTN3A2	cis	NotFnd	NotFnd	rs9379858	2.3e-28	209846_s_at	BTN3A2	cis
rs7746199	6	27293544	Whole blood (PAX) in breast cancer survivors [PMID 23880221]	1.08e-10	4920577	BTN3A2	cis	NotFnd	NotFnd	rs4712981	2.63e-54	4920577	BTN3A2	cis
rs6938200	6	27263370	LCL [PMID 17873877]	1.2e-09	209846_s_at	BTN3A2	cis	NotFnd	NotFnd	rs9379858	2.3e-28	209846_s_at	BTN3A2	cis
rs7763390	6	28746983	Peripheral blood mononuclear cells [PMID 26019233]	1.9e-09	ILMN_1676528	BTN3A2	trans	NotFnd	NotFnd	rs9366653	0	ILMN_1676528	BTN3A2	cis
rs16897515	6	27310240	Average in 10 brain regions [PMID 25174004]	2.24e-07	t2899333	BTN3A2	cis	NotFnd	NotFnd	rs9393715	4.32e-18	t2899333	BTN3A2	cis
rs16897515	6	27310240	Average in 10 brain regions [PMID 25174004]	3.45e-07	2899336	BTN3A2	cis	NotFnd	NotFnd	rs9393715	4.32e-18	t2899333	BTN3A2	cis
rs16897515	6	27310240	Temporal cortex [PMID 25174004]	4.35e-07	2899336	BTN3A2	cis	NotFnd	NotFnd	rs183691571	1.73e-08	2899336	BTN3A2	cis
rs16897515	6	27310240	Average in 10 brain regions [PMID 25174004]	2.15e-06	2899339	BTN3A2	cis	NotFnd	NotFnd	rs9393715	4.32e-18	t2899333	BTN3A2	cis
rs4712969	6	25763963	ER+ breast tumor cells [PMID 23374354]	5.56e-06		BTN3A2	cis	NotFnd	NotFnd	rs9358932	1.14e-10		BTN3A2	cis
rs13207082	6	27283599	ER+ breast tumor cells [PMID 23374354]	8.22e-06		BTN3A2	cis	NotFnd	NotFnd	rs9358932	1.14e-10		BTN3A2	cis
rs9467556	6	25663956	Peripheral blood mononuclear cells [PMID 26019233]	0.00198	ILMN_1700067	BTN3A2	cis	NotFnd	NotFnd	rs9366653	0	ILMN_1676528	BTN3A2	cis
rs16897515	6	27310240	Average in 10 brain regions [PMID 25174004]	7.87e-07	2899316	BTN3A2,BTN3A1	cis	NotFnd	NotFnd	rs6900665	4.75e-15	2899316	BTN3A2,BTN3A1	cis
rs649722	18	54317535	Peripheral blood mononuclear cells [PMID 26019233]	0.000835	ILMN_2169089	C18orf54	cis	0.028	1	rs1942994	7.84e-15	ILMN_2169089	C18orf54	cis
rs1787824	18	54356731	Peripheral blood mononuclear cells [PMID 26019233]	0.00131	ILMN_2169089	C18orf54	cis	0.034	1	rs1942994	7.84e-15	ILMN_2169089	C18orf54	cis
rs535154	18	54317404	Peripheral blood mononuclear cells [PMID 26019233]	0.00176	ILMN_2169089	C18orf54	cis	0.028	1	rs1942994	7.84e-15	ILMN_2169089	C18orf54	cis
rs1787828	18	54317424	Peripheral blood mononuclear cells [PMID 26019233]	0.00176	ILMN_2169089	C18orf54	cis	0.029	1	rs1942994	7.84e-15	ILMN_2169089	C18orf54	cis
rs664501	18	54316533	Peripheral blood mononuclear cells [PMID 26019233]	0.00177	ILMN_2169089	C18orf54	cis	0.029	1	rs1942994	7.84e-15	ILMN_2169089	C18orf54	cis
rs4961116	8	89154199	Liver (ScanDB)	5.14e-08		C19orf69	cis	SameSNP	SameSNP	rs4961116	5.14e-08		C19orf69	cis
rs663428	1	37741124	Peripheral blood mononuclear cells [PMID 26019233]	0.000628	ILMN_2077886	C1orf109	cis	0.048	1	rs7533921	8.38e-69	ILMN_2077886	C1orf109	cis
rs663428	1	37741124	Whole blood (CHARGE) [PMID 24013639]	3.04e-09	620433	C1orf122	cis	0.124	1	rs2306427	1.99e-17	620433	C1orf122	cis
rs605359	1	37762543	Whole blood (CHARGE) [PMID 24013639]	3.31e-09	620433	C1orf122	cis	0.113	1	rs2306427	1.99e-17	620433	C1orf122	cis
rs605359	1	37762543	Peripheral blood mononuclear cells [PMID 26019233]	1.31e-07	ILMN_1786273	C1orf122	cis	0.117	1	rs12732747	2.63e-38	ILMN_1786273	C1orf122	cis
rs663428	1	37741124	Peripheral blood mononuclear cells [PMID 26019233]	2.12e-06	ILMN_1786273	C1orf122	cis	0.129	1	rs12732747	2.63e-38	ILMN_1786273	C1orf122	cis
rs663428	1	37741124	CD14+ monocytes (untreated) [PMID 24604202]	3.18e-06	620433	C1ORF122	cis	0.124	1	rs12745294	6.68e-39	620433	C1ORF122	cis
rs663428	1	37741124	Liver(UChicago) [PMID 21637794]	0.0147	NA	C1orf122		SameSNP	SameSNP	rs663428	0.0147	NA	C1orf122
rs4256433	6	33988694	Peripheral blood mononuclear cells [PMID 26019233]	0.00192	ILMN_1704253	C6orf106	cis	NotFnd	NotFnd	rs3800461	2.29e-31	ILMN_1704253	C6orf106	cis
rs11215467	11	115291655	Skin (MuTHER) [PMID 22941192]	6.84e-09	ILMN_1680132	CADM1	cis	0.075	0.732	rs1048932	1.1e-48	ILMN_1680132	CADM1	cis
rs4938196	11	115293546	Skin (MuTHER) [PMID 22941192]	3.85e-08	ILMN_1680132	CADM1	cis	0.075	0.732	rs1048932	1.1e-48	ILMN_1680132	CADM1	cis
rs4938195	11	115292944	Skin (MuTHER) [PMID 22941192]	3.92e-08	ILMN_1680132	CADM1	cis	0.075	0.732	rs1048932	1.1e-48	ILMN_1680132	CADM1	cis
rs2071499	1	42164692	Peripheral blood mononuclear cells [PMID 26019233]	2.46e-07	ILMN_2050023	CCDC23	cis	NotFnd	NotFnd	rs17385526	0	ILMN_2050023	CCDC23	cis
rs842360	2	134590314	Peripheral blood mononuclear cells [PMID 26019233]	3.18e-12	ILMN_1722522	CCNT2	cis	0.109	0.488	rs17258458	1.72e-81	ILMN_1722522	CCNT2	cis
rs842358	2	134587538	Peripheral blood mononuclear cells [PMID 26019233]	3.39e-12	ILMN_1722522	CCNT2	cis	0.109	0.488	rs17258458	1.72e-81	ILMN_1722522	CCNT2	cis
rs6084497	20	3849826	CD14+ monocytes (untreated) [PMID 24604202]	5.79e-08	4760338	CDC25B	cis	0.071	0.362	rs4813643	2.21e-68	4760338	CDC25B	cis
rs6084497	20	3849826	CD14+ monocytes (IFNg stimulated) [PMID 24604202]	2.72e-06	4760338	CDC25B	cis	0.071	0.362	rs4813643	3.19e-53	4760338	CDC25B	cis
rs6084497	20	3849826	CD14+ monocytes (24h LPS stimulated) [PMID 24604202]	9.14e-05	4760338	CDC25B	cis	0.071	0.362	rs4813643	1.09e-52	4760338	CDC25B	cis
rs6084497	20	3849826	Monocytes (CD14+) [PMID 22446964]	0.000304	imS5fkxUBSuom.74k4	CDC25B	cis	0.071	0.362	rs4813643	2.47e-28	imS5fkxUBSuom.74k4	CDC25B	cis
rs6084497	20	3849826	CD14+ monocytes (IFNg stimulated) [PMID 24604202]	0.000681	610056	CENPB	cis	0.071	0.362	rs4813643	1.55e-11	610056	CENPB	cis
rs12562454	1	26344592	Peripheral blood mononuclear cells [PMID 26019233]	1.04e-06	ILMN_1812489	CEP85	cis	0.034	0.23	rs4585968	4.56e-37	ILMN_1812489	CEP85	cis
rs11247921	1	26339110	Peripheral blood mononuclear cells [PMID 26019233]	3.41e-05	ILMN_1812489	CEP85	cis	0.034	0.23	rs4585968	4.56e-37	ILMN_1812489	CEP85	cis
rs1892250	6	25768795	Peripheral blood mononuclear cells [PMID 26019233]	2.28e-08	ILMN_2086612	CMAHP	cis	NotFnd	NotFnd	rs3792970	9.62e-179	ILMN_1704084	CMAHP	cis
rs6902211	6	25767208	Peripheral blood mononuclear cells [PMID 26019233]	2.82e-08	ILMN_2086612	CMAHP	cis	NotFnd	NotFnd	rs3792970	9.62e-179	ILMN_1704084	CMAHP	cis
rs4712969	6	25763963	Peripheral blood mononuclear cells [PMID 26019233]	2.84e-08	ILMN_2086612	CMAHP	cis	NotFnd	NotFnd	rs3792970	9.62e-179	ILMN_1704084	CMAHP	cis
rs4236040	6	25760980	Peripheral blood mononuclear cells [PMID 26019233]	2.87e-08	ILMN_2086612	CMAHP	cis	NotFnd	NotFnd	rs3792970	9.62e-179	ILMN_1704084	CMAHP	cis
rs972087	6	25872350	Peripheral blood mononuclear cells [PMID 26019233]	1.4e-07	ILMN_2086612	CMAHP	cis	NotFnd	NotFnd	rs3792970	9.62e-179	ILMN_1704084	CMAHP	cis
rs972087	6	25872350	Peripheral blood mononuclear cells [PMID 26019233]	6.18e-07	ILMN_1704084	CMAHP	cis	NotFnd	NotFnd	rs3792970	9.62e-179	ILMN_1704084	CMAHP	cis
rs4236040	6	25760980	Peripheral blood mononuclear cells [PMID 26019233]	1.05e-06	ILMN_1704084	CMAHP	cis	NotFnd	NotFnd	rs3792970	9.62e-179	ILMN_1704084	CMAHP	cis
rs4712969	6	25763963	Peripheral blood mononuclear cells [PMID 26019233]	1.05e-06	ILMN_1704084	CMAHP	cis	NotFnd	NotFnd	rs3792970	9.62e-179	ILMN_1704084	CMAHP	cis
rs6902211	6	25767208	Peripheral blood mononuclear cells [PMID 26019233]	1.05e-06	ILMN_1704084	CMAHP	cis	NotFnd	NotFnd	rs3792970	9.62e-179	ILMN_1704084	CMAHP	cis
rs1892250	6	25768795	Peripheral blood mononuclear cells [PMID 26019233]	1.16e-06	ILMN_1704084	CMAHP	cis	NotFnd	NotFnd	rs3792970	9.62e-179	ILMN_1704084	CMAHP	cis
rs12620314	2	178163223	Peripheral blood mononuclear cells [PMID 26019233]	3.27e-08	ILMN_2377019	CORO1B	trans	NotFnd	NotFnd	rs1476792	1.62e-34	ILMN_1653708	CORO1B	cis
rs9144	11	88113588	Whole blood (CHARGE) [PMID 24013639]	3.38e-13	3450138	CTSC	cis	0.004	0.107	rs7930237	6.58e-187	3450138	CTSC	cis
rs9144	11	88113588	Whole blood (CHARGE) [PMID 24013639]	2.61e-09	5270367	CTSC	cis	0.004	0.107	rs7930237	6.58e-187	3450138	CTSC	cis
rs9144	11	88113588	Peripheral blood mononuclear cells [PMID 26019233]	0.000928	ILMN_2242463	CTSC	cis	0.005	0.13	rs217053	2.42e-140	ILMN_2242463	CTSC	cis
rs2846861	11	65454833	Peripheral blood mononuclear cells [PMID 26019233]	0.000294	ILMN_1794364	CTSW	cis	0.138	0.506	rs583887	2.81e-101	ILMN_1794364	CTSW	cis
rs1784859	11	65453277	Peripheral blood mononuclear cells [PMID 26019233]	0.000312	ILMN_1794364	CTSW	cis	0.138	0.506	rs583887	2.81e-101	ILMN_1794364	CTSW	cis
rs1626021	11	65458715	Peripheral blood mononuclear cells [PMID 26019233]	0.000312	ILMN_1794364	CTSW	cis	0.138	0.506	rs583887	2.81e-101	ILMN_1794364	CTSW	cis
rs842358	2	134587538	Peripheral blood mononuclear cells [PMID 26019233]	6.87e-09	ILMN_1813836	DARS	trans	NotFnd	NotFnd	rs2304370	1.41e-104	ILMN_1813836	DARS	cis
rs842360	2	134590314	Peripheral blood mononuclear cells [PMID 26019233]	7.81e-09	ILMN_1813836	DARS	trans	NotFnd	NotFnd	rs2304370	1.41e-104	ILMN_1813836	DARS	cis
rs17164353	4	1122837	Peripheral blood mononuclear cells [PMID 26019233]	4.62e-06	ILMN_1793017	DGKQ	cis	NotFnd	NotFnd	rs10004297	4.82e-27	ILMN_1793017	DGKQ	cis
rs2127910	4	1157975	Peripheral blood mononuclear cells [PMID 26019233]	4.62e-06	ILMN_1793017	DGKQ	cis	NotFnd	NotFnd	rs10004297	4.82e-27	ILMN_1793017	DGKQ	cis
rs17164349	4	1118928	Peripheral blood mononuclear cells [PMID 26019233]	4.63e-06	ILMN_1793017	DGKQ	cis	NotFnd	NotFnd	rs10004297	4.82e-27	ILMN_1793017	DGKQ	cis
rs17164350	4	1121941	Peripheral blood mononuclear cells [PMID 26019233]	4.63e-06	ILMN_1793017	DGKQ	cis	NotFnd	NotFnd	rs10004297	4.82e-27	ILMN_1793017	DGKQ	cis
rs17164346	4	1117178	Peripheral blood mononuclear cells [PMID 26019233]	5.26e-06	ILMN_1793017	DGKQ	cis	NotFnd	NotFnd	rs10004297	4.82e-27	ILMN_1793017	DGKQ	cis
rs9868023	3	37926169	Peripheral blood mononuclear cells [PMID 26019233]	0.000512	ILMN_2401987	DLEC1	cis	0.108	0.563	rs2128111	3.11e-16	ILMN_2401987	DLEC1	cis
rs7624710	3	37916811	Peripheral blood mononuclear cells [PMID 26019233]	0.00058	ILMN_2401987	DLEC1	cis	0.108	0.563	rs2128111	3.11e-16	ILMN_2401987	DLEC1	cis
rs6768915	3	37915720	Peripheral blood mononuclear cells [PMID 26019233]	0.000598	ILMN_2401987	DLEC1	cis	0.108	0.563	rs2128111	3.11e-16	ILMN_2401987	DLEC1	cis
rs11769117	7	97342253	Human cortex brain tissue [PMID 25290266]	4.31e-06		DLX6-AS1		SameSNP	SameSNP	rs11769117	4.31e-06		DLX6-AS1	cis
rs10511909	9	33132519	Peripheral blood mononuclear cells [PMID 26019233]	5.19e-05	ILMN_1672496	DNAJA1	cis	0.075	0.626	rs4879658	6.72e-32	ILMN_1672496	DNAJA1	cis
rs7090013	10	21155970	Bcells (CD19+) [PMID 22446964]	0.000264	ZkgQBi1JhiiJeIAiIk	DNAJC1	cis	0.948	1	rs1527042	0.000253	ZkgQBi1JhiiJeIAiIk	DNAJC1	cis
rs3860499	3	132431338	Peripheral blood mononuclear cells [PMID 26019233]	6.34e-18	ILMN_1752281	DNAJC13	cis	0.927	0.963	rs6806003	1.66e-18	ILMN_1752281	DNAJC13	cis
rs6439357	3	132430819	Peripheral blood mononuclear cells [PMID 26019233]	1.33e-17	ILMN_1752281	DNAJC13	cis	0.927	0.963	rs6806003	1.66e-18	ILMN_1752281	DNAJC13	cis
rs3860499	3	132431338	CD14+ monocytes (IFNg stimulated) [PMID 24604202]	0.000189	2900722	DNAJC13	cis	0.089	1	rs7619350	3.08e-25	2900722	DNAJC13	cis
rs2484083	10	84763923	Peripheral blood mononuclear cells [PMID 26019233]	1.12e-06	ILMN_2129388	FAM190B	cis	0.024	0.258	rs4934015	1e-172	ILMN_2129388	FAM190B	cis
rs2960355	10	84756059	Peripheral blood mononuclear cells [PMID 26019233]	1.14e-06	ILMN_2129388	FAM190B	cis	0.007	0.143	rs4934015	1e-172	ILMN_2129388	FAM190B	cis
rs2497995	10	84754644	Peripheral blood mononuclear cells [PMID 26019233]	1.22e-06	ILMN_2129388	FAM190B	cis	0.02	0.237	rs4934015	1e-172	ILMN_2129388	FAM190B	cis
rs1577285	10	84744978	Peripheral blood mononuclear cells [PMID 26019233]	2.98e-06	ILMN_2129388	FAM190B	cis	0.007	0.143	rs4934015	1e-172	ILMN_2129388	FAM190B	cis
rs12778325	10	84739983	Peripheral blood mononuclear cells [PMID 26019233]	5.26e-06	ILMN_2129388	FAM190B	cis	0.01	0.164	rs4934015	1e-172	ILMN_2129388	FAM190B	cis
rs2497993	10	84802275	Peripheral blood mononuclear cells [PMID 26019233]	1.54e-05	ILMN_2129388	FAM190B	cis	0.007	0.143	rs4934015	1e-172	ILMN_2129388	FAM190B	cis
rs2484084	10	84772058	Peripheral blood mononuclear cells [PMID 26019233]	1.57e-05	ILMN_2129388	FAM190B	cis	0.005	0.121	rs4934015	1e-172	ILMN_2129388	FAM190B	cis
rs2991915	10	84790467	Peripheral blood mononuclear cells [PMID 26019233]	1.57e-05	ILMN_2129388	FAM190B	cis	0.007	0.143	rs4934015	1e-172	ILMN_2129388	FAM190B	cis
rs9421478	10	84789195	Peripheral blood mononuclear cells [PMID 26019233]	1.83e-05	ILMN_2129388	FAM190B	cis	0.007	0.143	rs4934015	1e-172	ILMN_2129388	FAM190B	cis
rs7906672	10	84794300	Peripheral blood mononuclear cells [PMID 26019233]	2.14e-05	ILMN_2129388	FAM190B	cis	0.005	0.121	rs4934015	1e-172	ILMN_2129388	FAM190B	cis
rs1931875	10	84790664	Peripheral blood mononuclear cells [PMID 26019233]	2.18e-05	ILMN_2129388	FAM190B	cis	0.002	0.074	rs4934015	1e-172	ILMN_2129388	FAM190B	cis
rs2991916	10	84790396	Peripheral blood mononuclear cells [PMID 26019233]	0.000228	ILMN_2129388	FAM190B	cis	0.007	0.143	rs4934015	1e-172	ILMN_2129388	FAM190B	cis
rs1577269	10	84764709	Peripheral blood mononuclear cells [PMID 26019233]	0.00178	ILMN_2129388	FAM190B	cis	0.001	0.073	rs4934015	1e-172	ILMN_2129388	FAM190B	cis
rs7948130	11	13602541	CD14+ monocytes (untreated) [PMID 24604202]	0.000394	5090309	FAR1	cis	0.06	0.725	rs2173994	1.15e-20	5090309	FAR1	cis
rs10832034	11	13436410	Peripheral blood mononuclear cells [PMID 26019233]	0.00127	ILMN_2143250	FAR1	cis	0.028	0.56	rs7926048	9.05e-10	ILMN_2143250	FAR1	cis
rs986001	11	13449633	Peripheral blood mononuclear cells [PMID 26019233]	0.00127	ILMN_2143250	FAR1	cis	0.006	0.245	rs7926048	9.05e-10	ILMN_2143250	FAR1	cis
rs10766081	11	13414235	Peripheral blood mononuclear cells [PMID 26019233]	0.00231	ILMN_2143250	FAR1	cis	0.014	0.425	rs7926048	9.05e-10	ILMN_2143250	FAR1	cis
rs7948130	11	13602541	Peripheral blood mononuclear cells [PMID 26019233]	0.00233	ILMN_2143250	FAR1	cis	0.052	0.699	rs7926048	9.05e-10	ILMN_2143250	FAR1	cis
rs605359	1	37762543	Whole blood (CHARGE) [PMID 24013639]	3.54e-121	630142	FHL3	cis	0.287	0.59	rs4634868	9.81e-198	630142	FHL3	cis
rs663428	1	37741124	Peripheral blood mononuclear cells [PMID 26019233]	2.52e-37	ILMN_1703558	FHL3	cis	0.072	0.63	rs17465651	2.21e-123	ILMN_1703558	FHL3	cis
rs605359	1	37762543	Peripheral blood mononuclear cells [PMID 26019233]	1.95e-35	ILMN_1703558	FHL3	cis	0.066	0.633	rs17465651	2.21e-123	ILMN_1703558	FHL3	cis
rs663428	1	37741124	CD14+ monocytes (untreated) [PMID 24604202]	9.28e-13	4210564	FHL3	cis	0.236	0.509	rs4634868	2.27e-84	4210564	FHL3	cis
rs663428	1	37741124	CD14+ monocytes (IFNg stimulated) [PMID 24604202]	5.77e-10	4210564	FHL3	cis	0.236	0.509	rs4634868	1.64e-82	4210564	FHL3	cis
rs663428	1	37741124	Monocytes (CD14+) [PMID 22446964]	9.16e-09	QK3XOrl6gtfgLoe90o	FHL3	cis	0.236	0.509	rs4634868	7.01e-39	QK3XOrl6gtfgLoe90o	FHL3	cis
rs663428	1	37741124	CD14+ monocytes (24h LPS stimulated) [PMID 24604202]	2.06e-06	4210564	FHL3	cis	0.236	0.509	rs4634868	2.73e-39	4210564	FHL3	cis
rs605359	1	37762543	PaxGeneCells [PMID 19128478]	4.67e-05	ILMN_1703558	FHL3	cis	0.287	0.59	rs4634868	9.21e-11	ILMN_1703558	FHL3	cis
rs16897515	6	27310240	PrefrontalCortex [PMID 20351726]	2.53e-05	211454_x_at	FKSG49	cis	SameSNP	SameSNP	rs16897515	2.53e-05	211454_x_at	FKSG49	cis
rs6061952	20	62011418	Prostate adenocarcinoma, Li et al. (n=145) [PMID 24907074]	4.42e-07		GATA5	cis	SameSNP	SameSNP	rs6061952	4.42e-07		GATA5	cis
rs9972942	17	65774888	Peripheral blood mononuclear cells [PMID 26019233]	0.00189	ILMN_1758906	GNA13	cis	NotFnd	NotFnd	rs4791242	1.56e-37	ILMN_1758906	GNA13	cis
rs9907969	17	65758741	Peripheral blood mononuclear cells [PMID 26019233]	0.00205	ILMN_1758906	GNA13	cis	NotFnd	NotFnd	rs4791242	1.56e-37	ILMN_1758906	GNA13	cis
rs8076925	17	65768497	Peripheral blood mononuclear cells [PMID 26019233]	0.00205	ILMN_1758906	GNA13	cis	NotFnd	NotFnd	rs4791242	1.56e-37	ILMN_1758906	GNA13	cis
rs8077164	17	65768526	Peripheral blood mononuclear cells [PMID 26019233]	0.00205	ILMN_1758906	GNA13	cis	NotFnd	NotFnd	rs4791242	1.56e-37	ILMN_1758906	GNA13	cis
rs7207587	17	65770188	Peripheral blood mononuclear cells [PMID 26019233]	0.00205	ILMN_1758906	GNA13	cis	NotFnd	NotFnd	rs4791242	1.56e-37	ILMN_1758906	GNA13	cis
rs1421032	17	65770249	Peripheral blood mononuclear cells [PMID 26019233]	0.00205	ILMN_1758906	GNA13	cis	NotFnd	NotFnd	rs4791242	1.56e-37	ILMN_1758906	GNA13	cis
rs1421033	17	65770595	Peripheral blood mononuclear cells [PMID 26019233]	0.00205	ILMN_1758906	GNA13	cis	NotFnd	NotFnd	rs4791242	1.56e-37	ILMN_1758906	GNA13	cis
rs6416948	17	65771012	Peripheral blood mononuclear cells [PMID 26019233]	0.00205	ILMN_1758906	GNA13	cis	NotFnd	NotFnd	rs4791242	1.56e-37	ILMN_1758906	GNA13	cis
rs6416949	17	65771100	Peripheral blood mononuclear cells [PMID 26019233]	0.00205	ILMN_1758906	GNA13	cis	NotFnd	NotFnd	rs4791242	1.56e-37	ILMN_1758906	GNA13	cis
rs2318868	17	65771473	Peripheral blood mononuclear cells [PMID 26019233]	0.00205	ILMN_1758906	GNA13	cis	NotFnd	NotFnd	rs4791242	1.56e-37	ILMN_1758906	GNA13	cis
rs2318869	17	65771617	Peripheral blood mononuclear cells [PMID 26019233]	0.00205	ILMN_1758906	GNA13	cis	NotFnd	NotFnd	rs4791242	1.56e-37	ILMN_1758906	GNA13	cis
rs7218844	17	65772170	Peripheral blood mononuclear cells [PMID 26019233]	0.00205	ILMN_1758906	GNA13	cis	NotFnd	NotFnd	rs4791242	1.56e-37	ILMN_1758906	GNA13	cis
rs4791132	17	65773005	Peripheral blood mononuclear cells [PMID 26019233]	0.00205	ILMN_1758906	GNA13	cis	NotFnd	NotFnd	rs4791242	1.56e-37	ILMN_1758906	GNA13	cis
rs9894298	17	65773106	Peripheral blood mononuclear cells [PMID 26019233]	0.00205	ILMN_1758906	GNA13	cis	NotFnd	NotFnd	rs4791242	1.56e-37	ILMN_1758906	GNA13	cis
rs9899781	17	65773265	Peripheral blood mononuclear cells [PMID 26019233]	0.00205	ILMN_1758906	GNA13	cis	NotFnd	NotFnd	rs4791242	1.56e-37	ILMN_1758906	GNA13	cis
rs9901885	17	65773440	Peripheral blood mononuclear cells [PMID 26019233]	0.00205	ILMN_1758906	GNA13	cis	NotFnd	NotFnd	rs4791242	1.56e-37	ILMN_1758906	GNA13	cis
rs7215462	17	65774379	Peripheral blood mononuclear cells [PMID 26019233]	0.00205	ILMN_1758906	GNA13	cis	NotFnd	NotFnd	rs4791242	1.56e-37	ILMN_1758906	GNA13	cis
rs6504357	17	65774502	Peripheral blood mononuclear cells [PMID 26019233]	0.00205	ILMN_1758906	GNA13	cis	NotFnd	NotFnd	rs4791242	1.56e-37	ILMN_1758906	GNA13	cis
rs7220733	17	65768771	Peripheral blood mononuclear cells [PMID 26019233]	0.00211	ILMN_1758906	GNA13	cis	NotFnd	NotFnd	rs4791242	1.56e-37	ILMN_1758906	GNA13	cis
rs7211481	17	65770315	Peripheral blood mononuclear cells [PMID 26019233]	0.00211	ILMN_1758906	GNA13	cis	NotFnd	NotFnd	rs4791242	1.56e-37	ILMN_1758906	GNA13	cis
rs4961116	8	89154199	Liver (ScanDB)	6.94e-10		GP5	cis	SameSNP	SameSNP	rs4961116	6.94e-10		GP5	cis
rs4961116	8	89154199	Liver (ScanDB)	9.97e-08		GRM1	cis	NotFnd	NotFnd	rs7083394	3.81e-11		GRM1	cis
rs16897515	6	27310240	Peripheral blood mononuclear cells [PMID 26019233]	3.04e-22	ILMN_1651496	HIST1H2BD	trans	NotFnd	NotFnd	rs1009181	3.65e-161	ILMN_1651496	HIST1H2BD	cis
rs4236040	6	25760980	Peripheral blood mononuclear cells [PMID 26019233]	1.26e-21	ILMN_1651496	HIST1H2BD	cis	0.107	0.634	rs1009181	3.65e-161	ILMN_1651496	HIST1H2BD	cis
rs4712969	6	25763963	Peripheral blood mononuclear cells [PMID 26019233]	1.27e-21	ILMN_1651496	HIST1H2BD	cis	0.171	0.862	rs1009181	3.65e-161	ILMN_1651496	HIST1H2BD	cis
rs6902211	6	25767208	Peripheral blood mononuclear cells [PMID 26019233]	1.27e-21	ILMN_1651496	HIST1H2BD	cis	0.212	1	rs1009181	3.65e-161	ILMN_1651496	HIST1H2BD	cis
rs1892250	6	25768795	Peripheral blood mononuclear cells [PMID 26019233]	1.73e-21	ILMN_1651496	HIST1H2BD	cis	0.212	1	rs1009181	3.65e-161	ILMN_1651496	HIST1H2BD	cis
rs3800318	6	27295861	Peripheral blood mononuclear cells [PMID 26019233]	1.24e-20	ILMN_1651496	HIST1H2BD	trans	NotFnd	NotFnd	rs1009181	3.65e-161	ILMN_1651496	HIST1H2BD	cis
rs2893910	6	27315474	Peripheral blood mononuclear cells [PMID 26019233]	1.53e-20	ILMN_1651496	HIST1H2BD	trans	NotFnd	NotFnd	rs1009181	3.65e-161	ILMN_1651496	HIST1H2BD	cis
rs7746199	6	27293544	Peripheral blood mononuclear cells [PMID 26019233]	1.68e-20	ILMN_1651496	HIST1H2BD	trans	NotFnd	NotFnd	rs1009181	3.65e-161	ILMN_1651496	HIST1H2BD	cis
rs13211166	6	27298160	Peripheral blood mononuclear cells [PMID 26019233]	5.18e-20	ILMN_1651496	HIST1H2BD	trans	NotFnd	NotFnd	rs1009181	3.65e-161	ILMN_1651496	HIST1H2BD	cis
rs972087	6	25872350	Peripheral blood mononuclear cells [PMID 26019233]	1.38e-19	ILMN_1651496	HIST1H2BD	cis	0.132	0.729	rs1009181	3.65e-161	ILMN_1651496	HIST1H2BD	cis
rs13207082	6	27283599	Peripheral blood mononuclear cells [PMID 26019233]	4.17e-18	ILMN_1651496	HIST1H2BD	trans	NotFnd	NotFnd	rs1009181	3.65e-161	ILMN_1651496	HIST1H2BD	cis
rs16897515	6	27310240	Monocytes [PMID 20502693]	1.26e-12		HIST1H2BD	cis	NotFnd	NotFnd	rs1009181	3.47e-125		HIST1H2BD	cis
rs7746199	6	27293544	Monocytes [PMID 20502693]	3.15e-11		HIST1H2BD	cis	NotFnd	NotFnd	rs1009181	3.47e-125		HIST1H2BD	cis
rs13194053	6	27176103	Peripheral blood mononuclear cells [PMID 26019233]	9.02e-06	ILMN_1651496	HIST1H2BD	cis	NotFnd	NotFnd	rs1009181	3.65e-161	ILMN_1651496	HIST1H2BD	cis
rs6904071	6	27079476	Peripheral blood mononuclear cells [PMID 26019233]	9.22e-06	ILMN_1651496	HIST1H2BD	cis	NotFnd	NotFnd	rs1009181	3.65e-161	ILMN_1651496	HIST1H2BD	cis
rs926300	6	27091663	Peripheral blood mononuclear cells [PMID 26019233]	9.31e-06	ILMN_1651496	HIST1H2BD	cis	NotFnd	NotFnd	rs1009181	3.65e-161	ILMN_1651496	HIST1H2BD	cis
rs6913660	6	27123645	Peripheral blood mononuclear cells [PMID 26019233]	1.02e-05	ILMN_1651496	HIST1H2BD	cis	NotFnd	NotFnd	rs1009181	3.65e-161	ILMN_1651496	HIST1H2BD	cis
rs13219181	6	27168445	Peripheral blood mononuclear cells [PMID 26019233]	1.12e-05	ILMN_1651496	HIST1H2BD	cis	NotFnd	NotFnd	rs1009181	3.65e-161	ILMN_1651496	HIST1H2BD	cis
rs1892250	6	25768795	CD14+ monocytes (24h LPS stimulated) [PMID 24604202]	0.000366	290730	HIST1H2BD	cis	0.212	1	rs1009181	1.12e-44	290730	HIST1H2BD	cis
rs1892250	6	25768795	CD14+ monocytes (24h LPS stimulated) [PMID 24604202]	0.000474	6200669	HIST1H2BD	cis	0.212	1	rs1009181	1.12e-44	290730	HIST1H2BD	cis
rs6904071	6	27079476	Bcells (CD19+) [PMID 22446964]	0.000177	cZlk1iqIqTAz1zSVCA	HIST1H3I	cis	NotFnd	NotFnd	rs17587226	2.71e-05	cZlk1iqIqTAz1zSVCA	HIST1H3I	cis
rs6913660	6	27123645	Bcells (CD19+) [PMID 22446964]	0.000177	cZlk1iqIqTAz1zSVCA	HIST1H3I	cis	NotFnd	NotFnd	rs17587226	2.71e-05	cZlk1iqIqTAz1zSVCA	HIST1H3I	cis
rs13194053	6	27176103	Bcells (CD19+) [PMID 22446964]	0.000211	cZlk1iqIqTAz1zSVCA	HIST1H3I	cis	NotFnd	NotFnd	rs17587226	2.71e-05	cZlk1iqIqTAz1zSVCA	HIST1H3I	cis
rs7746199	6	27293544	Bcells (CD19+) [PMID 22446964]	0.000862	cZlk1iqIqTAz1zSVCA	HIST1H3I	cis	NotFnd	NotFnd	rs17587226	2.71e-05	cZlk1iqIqTAz1zSVCA	HIST1H3I	cis
rs2893910	6	27315474	Bcells (CD19+) [PMID 22446964]	0.00109	cZlk1iqIqTAz1zSVCA	HIST1H3I	cis	NotFnd	NotFnd	rs17587226	2.71e-05	cZlk1iqIqTAz1zSVCA	HIST1H3I	cis
rs972087	6	25872350	Peripheral blood mononuclear cells [PMID 26019233]	0.000446	ILMN_2075334	HIST1H4C	cis	0.188	1	rs198844	6.51e-11	ILMN_2075334	HIST1H4C	cis
rs972087	6	25872350	Whole blood (CHARGE) [PMID 24013639]	4.94e-08	3890349	HIST1H4C,HIST1H4A	cis	0.007	0.686	rs17596719	1.8e-13	3890349	HIST1H4C,HIST1H4A	cis
rs13207082	6	27283599	Peripheral blood mononuclear cells [PMID 26019233]	3.42e-14	ILMN_1671054	HLA-A	trans	NotFnd	NotFnd	rs2571383	6.17e-147	ILMN_1671054	HLA-A	cis
rs13207082	6	27283599	Monocytes [PMID 20502693]	1.87e-11		HLA-A	cis	NotFnd	NotFnd	rs2734959	5.36e-60		HLA-A	cis
rs972087	6	25872350	Peripheral blood mononuclear cells [PMID 26019233]	4.85e-09	ILMN_1671054	HLA-A	trans	NotFnd	NotFnd	rs2571383	6.17e-147	ILMN_1671054	HLA-A	cis
rs1892250	6	25768795	Peripheral blood mononuclear cells [PMID 26019233]	5.31e-09	ILMN_1671054	HLA-A	trans	NotFnd	NotFnd	rs2571383	6.17e-147	ILMN_1671054	HLA-A	cis
rs6902211	6	25767208	Peripheral blood mononuclear cells [PMID 26019233]	9.21e-09	ILMN_1671054	HLA-A	trans	NotFnd	NotFnd	rs2571383	6.17e-147	ILMN_1671054	HLA-A	cis
rs4712969	6	25763963	Peripheral blood mononuclear cells [PMID 26019233]	9.45e-09	ILMN_1671054	HLA-A	trans	NotFnd	NotFnd	rs2571383	6.17e-147	ILMN_1671054	HLA-A	cis
rs4236040	6	25760980	Peripheral blood mononuclear cells [PMID 26019233]	9.65e-09	ILMN_1671054	HLA-A	trans	NotFnd	NotFnd	rs2571383	6.17e-147	ILMN_1671054	HLA-A	cis
rs13207082	6	27283599	Monocytes [PMID 20502693]	4.74e-12		HLA-A29.1	cis	NotFnd	NotFnd	rs417162	2.95e-278		HLA-A29.1	cis
rs13207082	6	27283599	Peripheral blood mononuclear cells [PMID 26019233]	5.81e-20	ILMN_2150787	HLA-C	trans	NotFnd	NotFnd	rs1049281	0	ILMN_2150787	HLA-C	cis
rs1892250	6	25768795	Peripheral blood mononuclear cells [PMID 26019233]	2.71e-10	ILMN_2150787	HLA-C	trans	NotFnd	NotFnd	rs1049281	0	ILMN_2150787	HLA-C	cis
rs6902211	6	25767208	Peripheral blood mononuclear cells [PMID 26019233]	4.59e-10	ILMN_2150787	HLA-C	trans	NotFnd	NotFnd	rs1049281	0	ILMN_2150787	HLA-C	cis
rs4712969	6	25763963	Peripheral blood mononuclear cells [PMID 26019233]	4.69e-10	ILMN_2150787	HLA-C	trans	NotFnd	NotFnd	rs1049281	0	ILMN_2150787	HLA-C	cis
rs4236040	6	25760980	Peripheral blood mononuclear cells [PMID 26019233]	4.78e-10	ILMN_2150787	HLA-C	trans	NotFnd	NotFnd	rs1049281	0	ILMN_2150787	HLA-C	cis
rs6904071	6	27079476	Peripheral blood mononuclear cells [PMID 26019233]	1.11e-08	ILMN_2150787	HLA-C	trans	NotFnd	NotFnd	rs1049281	0	ILMN_2150787	HLA-C	cis
rs972087	6	25872350	Peripheral blood mononuclear cells [PMID 26019233]	1.75e-08	ILMN_2150787	HLA-C	trans	NotFnd	NotFnd	rs1049281	0	ILMN_2150787	HLA-C	cis
rs13194053	6	27176103	Peripheral blood mononuclear cells [PMID 26019233]	2.11e-08	ILMN_2150787	HLA-C	trans	NotFnd	NotFnd	rs1049281	0	ILMN_2150787	HLA-C	cis
rs926300	6	27091663	Peripheral blood mononuclear cells [PMID 26019233]	2.19e-08	ILMN_2150787	HLA-C	trans	NotFnd	NotFnd	rs1049281	0	ILMN_2150787	HLA-C	cis
rs6913660	6	27123645	Peripheral blood mononuclear cells [PMID 26019233]	2.27e-08	ILMN_2150787	HLA-C	trans	NotFnd	NotFnd	rs1049281	0	ILMN_2150787	HLA-C	cis
rs13219181	6	27168445	Peripheral blood mononuclear cells [PMID 26019233]	2.39e-08	ILMN_2150787	HLA-C	trans	NotFnd	NotFnd	rs1049281	0	ILMN_2150787	HLA-C	cis
rs9277002	6	33021995	Peripheral blood mononuclear cells [PMID 26019233]	3.37e-13	ILMN_1700428	HLA-DOB	cis	NotFnd	NotFnd	rs4148876	2.46e-131	ILMN_1700428	HLA-DOB	cis
rs9296088	6	33157964	Peripheral blood mononuclear cells [PMID 26019233]	9.98e-08	ILMN_1772218	HLA-DPA1	cis	NotFnd	NotFnd	rs11964507	5.63e-22	ILMN_1772218	HLA-DPA1	cis
rs9277002	6	33021995	Peripheral blood mononuclear cells [PMID 26019233]	0.000379	ILMN_1772218	HLA-DPA1	cis	NotFnd	NotFnd	rs11964507	5.63e-22	ILMN_1772218	HLA-DPA1	cis
rs9469357	6	33106839	Peripheral blood mononuclear cells [PMID 26019233]	3.89e-24	ILMN_1749070	HLA-DPB1	cis	NotFnd	NotFnd	rs9501259	6.68e-214	ILMN_1749070	HLA-DPB1	cis
rs7763822	6	33092650	Peripheral blood mononuclear cells [PMID 26019233]	5.88e-24	ILMN_1749070	HLA-DPB1	cis	NotFnd	NotFnd	rs9501259	6.68e-214	ILMN_1749070	HLA-DPB1	cis
rs9501255	6	33087320	Peripheral blood mononuclear cells [PMID 26019233]	9.63e-24	ILMN_1749070	HLA-DPB1	cis	NotFnd	NotFnd	rs9501259	6.68e-214	ILMN_1749070	HLA-DPB1	cis
rs3749985	6	33086655	Peripheral blood mononuclear cells [PMID 26019233]	1e-23	ILMN_1749070	HLA-DPB1	cis	NotFnd	NotFnd	rs9501259	6.68e-214	ILMN_1749070	HLA-DPB1	cis
rs9501263	6	33089573	Peripheral blood mononuclear cells [PMID 26019233]	2.28e-23	ILMN_1749070	HLA-DPB1	cis	NotFnd	NotFnd	rs9501259	6.68e-214	ILMN_1749070	HLA-DPB1	cis
rs7763822	6	33092650	Monocytes [PMID 20502693]	1.25e-20		HLA-DPB1	cis	NotFnd	NotFnd	rs3128963	3.24e-145		HLA-DPB1	cis
rs7764491	6	33093062	Monocytes [PMID 20502693]	1.34e-20		HLA-DPB1	cis	NotFnd	NotFnd	rs3128963	3.24e-145		HLA-DPB1	cis
rs367645	6	33056721	Peripheral blood mononuclear cells [PMID 26019233]	9.14e-16	ILMN_1749070	HLA-DPB1	cis	NotFnd	NotFnd	rs9501259	6.68e-214	ILMN_1749070	HLA-DPB1	cis
rs367645	6	33056721	Monocytes [PMID 20502693]	4.95e-14		HLA-DPB1	cis	NotFnd	NotFnd	rs3128963	3.24e-145		HLA-DPB1	cis
rs13207082	6	27283599	Peripheral blood mononuclear cells [PMID 26019233]	3.01e-10	ILMN_1749070	HLA-DPB1	trans	NotFnd	NotFnd	rs9501259	6.68e-214	ILMN_1749070	HLA-DPB1	cis
rs3135195	6	33031552	Peripheral blood mononuclear cells [PMID 26019233]	5.5e-08	ILMN_1749070	HLA-DPB1	cis	NotFnd	NotFnd	rs9501259	6.68e-214	ILMN_1749070	HLA-DPB1	cis
rs7763822	6	33092650	CD14+ monocytes (untreated) [PMID 24604202]	1.65e-06	1050360	HLA-DPB1	cis	NotFnd	NotFnd	rs2179915	2.13e-50	1050360	HLA-DPB1	cis
rs7763822	6	33092650	CD14+ monocytes (IFNg stimulated) [PMID 24604202]	2.93e-06	1050360	HLA-DPB1	cis	NotFnd	NotFnd	rs2179915	6.02e-54	1050360	HLA-DPB1	cis
rs7763822	6	33092650	CD14+ monocytes (2h LPS stimulated) [PMID 24604202]	0.000182	1050360	HLA-DPB1	cis	NotFnd	NotFnd	rs2179915	3.83e-32	1050360	HLA-DPB1	cis
rs7763822	6	33092650	CD14+ monocytes (24h LPS stimulated) [PMID 24604202]	0.000798	1050360	HLA-DPB1	cis	NotFnd	NotFnd	rs2179915	1.86e-26	1050360	HLA-DPB1	cis
rs210181	6	33517843	Peripheral blood mononuclear cells [PMID 26019233]	0.000875	ILMN_1749070	HLA-DPB1	cis	NotFnd	NotFnd	rs9501259	6.68e-214	ILMN_1749070	HLA-DPB1	cis
rs9296088	6	33157964	Whole blood (PaxGene) in Japanese [PMID 23359819]	4.47e-12	A_24_P288836	HLA-DPB2	cis	NotFnd	NotFnd	rs4412248	9.11e-17	A_24_P288836	HLA-DPB2	cis
rs13207082	6	27283599	Peripheral blood mononuclear cells [PMID 26019233]	4.37e-10	ILMN_1808405	HLA-DQA1	trans	NotFnd	NotFnd	rs9271594	0	ILMN_3249667	HLA-DQA1	cis
rs7746199	6	27293544	Peripheral blood mononuclear cells [PMID 26019233]	1.75e-08	ILMN_1808405	HLA-DQA1	trans	NotFnd	NotFnd	rs9271594	0	ILMN_3249667	HLA-DQA1	cis
rs3800318	6	27295861	Peripheral blood mononuclear cells [PMID 26019233]	3.55e-08	ILMN_1808405	HLA-DQA1	trans	NotFnd	NotFnd	rs9271594	0	ILMN_3249667	HLA-DQA1	cis
rs13207082	6	27283599	Peripheral blood mononuclear cells [PMID 26019233]	5.01e-08	ILMN_3249667	HLA-DQA1	trans	NotFnd	NotFnd	rs9271594	0	ILMN_3249667	HLA-DQA1	cis
rs2893910	6	27315474	Peripheral blood mononuclear cells [PMID 26019233]	5.25e-08	ILMN_1808405	HLA-DQA1	trans	NotFnd	NotFnd	rs9271594	0	ILMN_3249667	HLA-DQA1	cis
rs16897515	6	27310240	Peripheral blood mononuclear cells [PMID 26019233]	8.37e-08	ILMN_1808405	HLA-DQA1	trans	NotFnd	NotFnd	rs9271594	0	ILMN_3249667	HLA-DQA1	cis
rs210181	6	33517843	Lung [PMID 23209423]	3.4e-05	100313766_TGI_at	HLA-DQA1	cis	NotFnd	NotFnd	rs2248462	<2E-16	100313766_TGI_at	HLA-DQA1	trans
rs3135195	6	33031552	Peripheral blood mononuclear cells [PMID 26019233]	0.00198	ILMN_3249667	HLA-DQA1	cis	NotFnd	NotFnd	rs9271594	0	ILMN_3249667	HLA-DQA1	cis
rs13194053	6	27176103	Whole blood (CHARGE) [PMID 24013639]	3.43e-10	2570564	HLA-DRA	trans	NotFnd	NotFnd	rs9271775	9.81e-198	2570564	HLA-DRA	cis
rs210181	6	33517843	Lung [PMID 23209423]	5.66e-05	100125275_TGI_at	HLA-DRB1	cis	NotFnd	NotFnd	rs2736186	<2E-16	100312946_TGI_at	HLA-DRB1	cis
rs13207082	6	27283599	Monocytes [PMID 20502693]	2.76e-11		HLA-DRB4	cis	NotFnd	NotFnd	rs2187668	4.82e-95		HLA-DRB4	cis
rs13207082	6	27283599	Peripheral blood mononuclear cells [PMID 26019233]	5.8e-52	ILMN_1656670	HLA-G	trans	NotFnd	NotFnd	rs1632882	1.6e-232	ILMN_1656670	HLA-G	cis
rs7746199	6	27293544	Peripheral blood mononuclear cells [PMID 26019233]	1.62e-23	ILMN_1656670	HLA-G	trans	NotFnd	NotFnd	rs1632882	1.6e-232	ILMN_1656670	HLA-G	cis
rs3800318	6	27295861	Peripheral blood mononuclear cells [PMID 26019233]	2.2e-23	ILMN_1656670	HLA-G	trans	NotFnd	NotFnd	rs1632882	1.6e-232	ILMN_1656670	HLA-G	cis
rs2893910	6	27315474	Peripheral blood mononuclear cells [PMID 26019233]	3.59e-23	ILMN_1656670	HLA-G	trans	NotFnd	NotFnd	rs1632882	1.6e-232	ILMN_1656670	HLA-G	cis
rs16897515	6	27310240	Peripheral blood mononuclear cells [PMID 26019233]	4.77e-23	ILMN_1656670	HLA-G	trans	NotFnd	NotFnd	rs1632882	1.6e-232	ILMN_1656670	HLA-G	cis
rs972087	6	25872350	Peripheral blood mononuclear cells [PMID 26019233]	1.43e-21	ILMN_1656670	HLA-G	trans	NotFnd	NotFnd	rs1632882	1.6e-232	ILMN_1656670	HLA-G	cis
rs1892250	6	25768795	Peripheral blood mononuclear cells [PMID 26019233]	5.79e-21	ILMN_1656670	HLA-G	trans	NotFnd	NotFnd	rs1632882	1.6e-232	ILMN_1656670	HLA-G	cis
rs6902211	6	25767208	Peripheral blood mononuclear cells [PMID 26019233]	6.6e-21	ILMN_1656670	HLA-G	trans	NotFnd	NotFnd	rs1632882	1.6e-232	ILMN_1656670	HLA-G	cis
rs4712969	6	25763963	Peripheral blood mononuclear cells [PMID 26019233]	6.67e-21	ILMN_1656670	HLA-G	trans	NotFnd	NotFnd	rs1632882	1.6e-232	ILMN_1656670	HLA-G	cis
rs4236040	6	25760980	Peripheral blood mononuclear cells [PMID 26019233]	6.76e-21	ILMN_1656670	HLA-G	trans	NotFnd	NotFnd	rs1632882	1.6e-232	ILMN_1656670	HLA-G	cis
rs6904071	6	27079476	Peripheral blood mononuclear cells [PMID 26019233]	7.15e-21	ILMN_1656670	HLA-G	trans	NotFnd	NotFnd	rs1632882	1.6e-232	ILMN_1656670	HLA-G	cis
rs926300	6	27091663	Peripheral blood mononuclear cells [PMID 26019233]	1.76e-20	ILMN_1656670	HLA-G	trans	NotFnd	NotFnd	rs1632882	1.6e-232	ILMN_1656670	HLA-G	cis
rs6913660	6	27123645	Peripheral blood mononuclear cells [PMID 26019233]	1.87e-20	ILMN_1656670	HLA-G	trans	NotFnd	NotFnd	rs1632882	1.6e-232	ILMN_1656670	HLA-G	cis
rs13219181	6	27168445	Peripheral blood mononuclear cells [PMID 26019233]	1.98e-20	ILMN_1656670	HLA-G	trans	NotFnd	NotFnd	rs1632882	1.6e-232	ILMN_1656670	HLA-G	cis
rs13194053	6	27176103	Peripheral blood mononuclear cells [PMID 26019233]	2.43e-20	ILMN_1656670	HLA-G	trans	NotFnd	NotFnd	rs1632882	1.6e-232	ILMN_1656670	HLA-G	cis
rs13211166	6	27298160	Peripheral blood mononuclear cells [PMID 26019233]	6.97e-20	ILMN_1656670	HLA-G	trans	NotFnd	NotFnd	rs1632882	1.6e-232	ILMN_1656670	HLA-G	cis
rs3800307	6	27218012	Peripheral blood mononuclear cells [PMID 26019233]	3.5e-15	ILMN_1656670	HLA-G	trans	NotFnd	NotFnd	rs1632882	1.6e-232	ILMN_1656670	HLA-G	cis
rs6938200	6	27263370	Peripheral blood mononuclear cells [PMID 26019233]	2.13e-14	ILMN_1656670	HLA-G	trans	NotFnd	NotFnd	rs1632882	1.6e-232	ILMN_1656670	HLA-G	cis
rs13207082	6	27283599	Peripheral blood mononuclear cells [PMID 26019233]	3.61e-28	ILMN_1666078	HLA-H	trans	NotFnd	NotFnd	rs2860580	0	ILMN_1666078	HLA-H	cis
rs6902211	6	25767208	Peripheral blood mononuclear cells [PMID 26019233]	8.77e-15	ILMN_1666078	HLA-H	trans	NotFnd	NotFnd	rs2860580	0	ILMN_1666078	HLA-H	cis
rs4712969	6	25763963	Peripheral blood mononuclear cells [PMID 26019233]	8.84e-15	ILMN_1666078	HLA-H	trans	NotFnd	NotFnd	rs2860580	0	ILMN_1666078	HLA-H	cis
rs4236040	6	25760980	Peripheral blood mononuclear cells [PMID 26019233]	8.89e-15	ILMN_1666078	HLA-H	trans	NotFnd	NotFnd	rs2860580	0	ILMN_1666078	HLA-H	cis
rs1892250	6	25768795	Peripheral blood mononuclear cells [PMID 26019233]	9.17e-15	ILMN_1666078	HLA-H	trans	NotFnd	NotFnd	rs2860580	0	ILMN_1666078	HLA-H	cis
rs972087	6	25872350	Peripheral blood mononuclear cells [PMID 26019233]	4.25e-14	ILMN_1666078	HLA-H	trans	NotFnd	NotFnd	rs2860580	0	ILMN_1666078	HLA-H	cis
rs6904071	6	27079476	Peripheral blood mononuclear cells [PMID 26019233]	4.38e-12	ILMN_1666078	HLA-H	trans	NotFnd	NotFnd	rs2860580	0	ILMN_1666078	HLA-H	cis
rs926300	6	27091663	Peripheral blood mononuclear cells [PMID 26019233]	2.59e-11	ILMN_1666078	HLA-H	trans	NotFnd	NotFnd	rs2860580	0	ILMN_1666078	HLA-H	cis
rs6913660	6	27123645	Peripheral blood mononuclear cells [PMID 26019233]	2.68e-11	ILMN_1666078	HLA-H	trans	NotFnd	NotFnd	rs2860580	0	ILMN_1666078	HLA-H	cis
rs13219181	6	27168445	Peripheral blood mononuclear cells [PMID 26019233]	3.14e-11	ILMN_1666078	HLA-H	trans	NotFnd	NotFnd	rs2860580	0	ILMN_1666078	HLA-H	cis
rs13194053	6	27176103	Peripheral blood mononuclear cells [PMID 26019233]	5.39e-11	ILMN_1666078	HLA-H	trans	NotFnd	NotFnd	rs2860580	0	ILMN_1666078	HLA-H	cis
rs3800318	6	27295861	Peripheral blood mononuclear cells [PMID 26019233]	1.69e-08	ILMN_1666078	HLA-H	trans	NotFnd	NotFnd	rs2860580	0	ILMN_1666078	HLA-H	cis
rs16897515	6	27310240	Peripheral blood mononuclear cells [PMID 26019233]	1.75e-08	ILMN_1666078	HLA-H	trans	NotFnd	NotFnd	rs2860580	0	ILMN_1666078	HLA-H	cis
rs2893910	6	27315474	Peripheral blood mononuclear cells [PMID 26019233]	1.96e-08	ILMN_1666078	HLA-H	trans	NotFnd	NotFnd	rs2860580	0	ILMN_1666078	HLA-H	cis
rs7746199	6	27293544	Peripheral blood mononuclear cells [PMID 26019233]	2.02e-08	ILMN_1666078	HLA-H	trans	NotFnd	NotFnd	rs2860580	0	ILMN_1666078	HLA-H	cis
rs6904071	6	27079476	CD14+ monocytes (untreated) [PMID 24604202]	1.59e-05	5270689	HMGN4	cis	0.174	1	rs10484442	1.1e-17	5270689	HMGN4	cis
rs6913660	6	27123645	CD14+ monocytes (untreated) [PMID 24604202]	1.59e-05	5270689	HMGN4	cis	NotFnd	NotFnd	rs10484442	1.1e-17	5270689	HMGN4	cis
rs13194053	6	27176103	CD14+ monocytes (untreated) [PMID 24604202]	2.53e-05	5270689	HMGN4	cis	NotFnd	NotFnd	rs10484442	1.1e-17	5270689	HMGN4	cis
rs1892250	6	25768795	CD14+ monocytes (IFNg stimulated) [PMID 24604202]	3.39e-05	5270689	HMGN4	cis	NotFnd	NotFnd	rs6927012	5.04e-17	5270689	HMGN4	cis
rs6904071	6	27079476	Whole blood (PAX) in breast cancer survivors [PMID 23880221]	0.0001	2650519	HMGN4	cis	0.583	1	rs4358615	5.68e-08	2650519	HMGN4	cis
rs6904071	6	27079476	CD16+ neutrophils (n=101, PMID 26151759)	0.000105	5270689	HMGN4	cis	1	1	rs13194053	0.000105	5270689	HMGN4	cis
rs6913660	6	27123645	CD16+ neutrophils (n=101, PMID 26151759)	0.000105	5270689	HMGN4	cis	1	1	rs13194053	0.000105	5270689	HMGN4	cis
rs13219181	6	27168445	CD16+ neutrophils (n=101, PMID 26151759)	0.000105	5270689	HMGN4	cis	1	1	rs13194053	0.000105	5270689	HMGN4	cis
rs13194053	6	27176103	CD16+ neutrophils (n=101, PMID 26151759)	0.000105	5270689	HMGN4	cis	SameSNP	SameSNP	rs13194053	0.000105	5270689	HMGN4	cis
rs926300	6	27091663	CD16+ neutrophils (n=101, PMID 26151759)	0.000107	5270689	HMGN4	cis	SameSNP	SameSNP	rs926300	0.000107	5270689	HMGN4	cis
rs13207082	6	27283599	CD14+ monocytes (IFNg stimulated) [PMID 24604202]	0.00025	5270689	HMGN4	cis	NotFnd	NotFnd	rs6927012	5.04e-17	5270689	HMGN4	cis
rs6904071	6	27079476	CD14+ monocytes (2h LPS stimulated) [PMID 24604202]	0.000268	5270689	HMGN4	cis	0.583	1	rs4358615	2.86e-08	5270689	HMGN4	cis
rs6913660	6	27123645	CD14+ monocytes (2h LPS stimulated) [PMID 24604202]	0.000268	5270689	HMGN4	cis	0.583	1	rs4358615	2.86e-08	5270689	HMGN4	cis
rs13194053	6	27176103	CD14+ monocytes (2h LPS stimulated) [PMID 24604202]	0.000268	5270689	HMGN4	cis	0.583	1	rs4358615	2.86e-08	5270689	HMGN4	cis
rs12508156	4	86506295	Peripheral blood mononuclear cells [PMID 26019233]	0.00205	ILMN_1735367	HSD17B11	cis	NotFnd	NotFnd	rs10004027	1.88e-64	ILMN_1735367	HSD17B11	cis
rs12499206	4	86578083	Peripheral blood mononuclear cells [PMID 26019233]	0.00239	ILMN_1735367	HSD17B11	cis	NotFnd	NotFnd	rs10004027	1.88e-64	ILMN_1735367	HSD17B11	cis
rs12512524	4	86454812	Peripheral blood mononuclear cells [PMID 26019233]	0.00241	ILMN_1735367	HSD17B11	cis	NotFnd	NotFnd	rs10004027	1.88e-64	ILMN_1735367	HSD17B11	cis
rs12505291	4	86590417	Peripheral blood mononuclear cells [PMID 26019233]	0.00252	ILMN_1735367	HSD17B11	cis	NotFnd	NotFnd	rs10004027	1.88e-64	ILMN_1735367	HSD17B11	cis
rs12498653	4	86684862	Peripheral blood mononuclear cells [PMID 26019233]	0.00261	ILMN_1735367	HSD17B11	cis	NotFnd	NotFnd	rs10004027	1.88e-64	ILMN_1735367	HSD17B11	cis
rs12508579	4	86436634	Peripheral blood mononuclear cells [PMID 26019233]	0.00264	ILMN_1735367	HSD17B11	cis	NotFnd	NotFnd	rs10004027	1.88e-64	ILMN_1735367	HSD17B11	cis
rs12509049	4	86634593	Peripheral blood mononuclear cells [PMID 26019233]	0.00273	ILMN_1735367	HSD17B11	cis	NotFnd	NotFnd	rs10004027	1.88e-64	ILMN_1735367	HSD17B11	cis
rs12509039	4	86611797	Peripheral blood mononuclear cells [PMID 26019233]	0.00274	ILMN_1735367	HSD17B11	cis	NotFnd	NotFnd	rs10004027	1.88e-64	ILMN_1735367	HSD17B11	cis
rs7763822	6	33092650	CD14+ monocytes (IFNg stimulated) [PMID 24604202]	0.000329	5700056	HSD17B8	cis	NotFnd	NotFnd	rs7750000	8.1e-05	5700056	HSD17B8	cis
rs10210510	2	208567193	Peripheral blood mononuclear cells [PMID 26019233]	0.00266	ILMN_2091347	IDH1	cis	NotFnd	NotFnd	rs11538998	8.08e-07	ILMN_2091347	IDH1	cis
rs7091957	10	132625973	Peripheral blood mononuclear cells [PMID 26019233]	6.05e-07	ILMN_1664608	INPP5A	cis	0.434	1	rs2485636	8.03e-09	ILMN_1664608	INPP5A	cis
rs4880419	10	132642604	Peripheral blood mononuclear cells [PMID 26019233]	4.18e-06	ILMN_1664608	INPP5A	cis	0.275	0.746	rs2485636	8.03e-09	ILMN_1664608	INPP5A	cis
rs16823011	2	182291058	Peripheral blood mononuclear cells [PMID 26019233]	0.00269	ILMN_1747052	ITGA4	cis	NotFnd	NotFnd	rs2124440	3.17e-88	ILMN_1747052	ITGA4	cis
rs16823010	2	182290836	Peripheral blood mononuclear cells [PMID 26019233]	0.00279	ILMN_1747052	ITGA4	cis	NotFnd	NotFnd	rs2124440	3.17e-88	ILMN_1747052	ITGA4	cis
rs17527406	6	33709544	Peripheral blood mononuclear cells [PMID 26019233]	3.47e-09	ILMN_1815500	ITPR3	cis	0.066	1	rs4259245	8.59e-92	ILMN_1815500	ITPR3	cis
rs9277002	6	33021995	Peripheral blood mononuclear cells [PMID 26019233]	1.92e-05	ILMN_1815500	ITPR3	cis	NotFnd	NotFnd	rs4259245	8.59e-92	ILMN_1815500	ITPR3	cis
rs367645	6	33056721	Peripheral blood mononuclear cells [PMID 26019233]	0.000449	ILMN_1815500	ITPR3	cis	NotFnd	NotFnd	rs4259245	8.59e-92	ILMN_1815500	ITPR3	cis
rs2071499	1	42164692	Peripheral blood mononuclear cells [PMID 26019233]	0.00011	ILMN_1664294	LEPRE1	cis	NotFnd	NotFnd	rs10890213	1.42e-32	ILMN_1664294	LEPRE1	cis
rs2505900	10	29601337	Peripheral blood mononuclear cells [PMID 26019233]	6.67e-05	ILMN_1679150	LOC387647	cis	0.009	0.104	rs3740005	3.7e-52	ILMN_1679150	LOC387647	cis
rs2505899	10	29600772	Peripheral blood mononuclear cells [PMID 26019233]	7.69e-05	ILMN_1679150	LOC387647	cis	0.009	0.104	rs3740005	3.7e-52	ILMN_1679150	LOC387647	cis
rs2505898	10	29600760	Peripheral blood mononuclear cells [PMID 26019233]	8.33e-05	ILMN_1679150	LOC387647	cis	0.009	0.104	rs3740005	3.7e-52	ILMN_1679150	LOC387647	cis
rs2488682	10	29600511	Peripheral blood mononuclear cells [PMID 26019233]	9.34e-05	ILMN_1679150	LOC387647	cis	0.009	0.104	rs3740005	3.7e-52	ILMN_1679150	LOC387647	cis
rs2488683	10	29600319	Peripheral blood mononuclear cells [PMID 26019233]	0.00014	ILMN_1679150	LOC387647	cis	0.009	0.104	rs3740005	3.7e-52	ILMN_1679150	LOC387647	cis
rs1626021	11	65458715	Peripheral blood mononuclear cells [PMID 26019233]	6.48e-13	ILMN_1805395	LTBP3	cis	0.551	0.943	rs11227199	9.14e-20	ILMN_1805395	LTBP3	cis
rs2846861	11	65454833	Peripheral blood mononuclear cells [PMID 26019233]	7.32e-13	ILMN_1805395	LTBP3	cis	0.551	0.943	rs11227199	9.14e-20	ILMN_1805395	LTBP3	cis
rs1784859	11	65453277	Peripheral blood mononuclear cells [PMID 26019233]	7.54e-13	ILMN_1805395	LTBP3	cis	0.551	0.943	rs11227199	9.14e-20	ILMN_1805395	LTBP3	cis
rs17164346	4	1117178	Peripheral blood mononuclear cells [PMID 26019233]	3.05e-05	ILMN_1747771	MAEA	cis	NotFnd	NotFnd	rs1250121	5.25e-48	ILMN_1747771	MAEA	cis
rs17164349	4	1118928	Peripheral blood mononuclear cells [PMID 26019233]	3.17e-05	ILMN_1747771	MAEA	cis	NotFnd	NotFnd	rs1250121	5.25e-48	ILMN_1747771	MAEA	cis
rs17164350	4	1121941	Peripheral blood mononuclear cells [PMID 26019233]	3.17e-05	ILMN_1747771	MAEA	cis	NotFnd	NotFnd	rs1250121	5.25e-48	ILMN_1747771	MAEA	cis
rs17164353	4	1122837	Peripheral blood mononuclear cells [PMID 26019233]	3.17e-05	ILMN_1747771	MAEA	cis	NotFnd	NotFnd	rs1250121	5.25e-48	ILMN_1747771	MAEA	cis
rs2127910	4	1157975	Peripheral blood mononuclear cells [PMID 26019233]	3.17e-05	ILMN_1747771	MAEA	cis	NotFnd	NotFnd	rs1250121	5.25e-48	ILMN_1747771	MAEA	cis
rs17164346	4	1117178	Peripheral blood mononuclear cells [PMID 26019233]	0.000179	ILMN_2327090	MAEA	cis	NotFnd	NotFnd	rs1250121	5.25e-48	ILMN_1747771	MAEA	cis
rs2127910	4	1157975	Peripheral blood mononuclear cells [PMID 26019233]	0.000181	ILMN_2327090	MAEA	cis	NotFnd	NotFnd	rs1250121	5.25e-48	ILMN_1747771	MAEA	cis
rs17164349	4	1118928	Peripheral blood mononuclear cells [PMID 26019233]	0.000182	ILMN_2327090	MAEA	cis	NotFnd	NotFnd	rs1250121	5.25e-48	ILMN_1747771	MAEA	cis
rs17164350	4	1121941	Peripheral blood mononuclear cells [PMID 26019233]	0.000182	ILMN_2327090	MAEA	cis	NotFnd	NotFnd	rs1250121	5.25e-48	ILMN_1747771	MAEA	cis
rs17164353	4	1122837	Peripheral blood mononuclear cells [PMID 26019233]	0.000182	ILMN_2327090	MAEA	cis	NotFnd	NotFnd	rs1250121	5.25e-48	ILMN_1747771	MAEA	cis
rs1626021	11	65458715	Peripheral blood mononuclear cells [PMID 26019233]	2.91e-21	ILMN_1651788	MAP3K11	cis	0.048	0.319	rs1151490	3e-148	ILMN_1651788	MAP3K11	cis
rs2846861	11	65454833	Peripheral blood mononuclear cells [PMID 26019233]	8.66e-21	ILMN_1651788	MAP3K11	cis	0.048	0.319	rs1151490	3e-148	ILMN_1651788	MAP3K11	cis
rs1784859	11	65453277	Peripheral blood mononuclear cells [PMID 26019233]	1.31e-20	ILMN_1651788	MAP3K11	cis	0.048	0.319	rs1151490	3e-148	ILMN_1651788	MAP3K11	cis
rs1626021	11	65458715	Whole blood (CHARGE) [PMID 24013639]	8.93e-52	4890068	MAP3K11,SIPA1	cis	0.27	0.646	rs7946115	6.73e-179	4890068	MAP3K11,SIPA1	cis
rs2846861	11	65454833	Whole blood (CHARGE) [PMID 24013639]	2.89e-50	4890068	MAP3K11,SIPA1	cis	0.27	0.646	rs7946115	6.73e-179	4890068	MAP3K11,SIPA1	cis
rs1784859	11	65453277	Whole blood (CHARGE) [PMID 24013639]	3.76e-50	4890068	MAP3K11,SIPA1	cis	0.27	0.646	rs7946115	6.73e-179	4890068	MAP3K11,SIPA1	cis
rs1808536	19	8376972	Subc adipose (MuTHER) [PMID 22941192]	5.22e-07	ILMN_1669592	MARCH2,	cis	NotFnd	NotFnd	rs4804074	4.04e-35	ILMN_1669592	MARCH2,	cis
rs1808536	19	8376972	Subc adipose (MuTHER) [PMID 22941192]	3.43e-06	ILMN_1703142	MARCH2,	cis	NotFnd	NotFnd	rs4804074	4.04e-35	ILMN_1669592	MARCH2,	cis
rs1808536	19	8376972	Subc adipose (MuTHER) [PMID 22941192]	1.56e-05	ILMN_2337789	MARCH2,	cis	NotFnd	NotFnd	rs4804074	4.04e-35	ILMN_1669592	MARCH2,	cis
rs1808536	19	8376972	Whole blood (CHARGE) [PMID 24013639]	1.55e-15	5670735	MARCH2,ELAVL1	cis	NotFnd	NotFnd	rs3794997	3.25e-72	5670735	MARCH2,	cis
rs842358	2	134587538	Whole blood (CHARGE) [PMID 24013639]	1.06e-09	2230382	MGAT5	cis	0.048	0.299	rs2289469	1.06e-98	2230382	MGAT5	cis
rs842360	2	134590314	Whole blood (CHARGE) [PMID 24013639]	1.06e-09	2230382	MGAT5	cis	0.048	0.299	rs2289469	1.06e-98	2230382	MGAT5	cis
rs11149989	16	77417585	Whole blood (CHARGE) [PMID 24013639]	4.47e-10	5310674	MON1B	cis	0.031	0.214	rs8061864	9.81e-198	5310674	MON1B	cis
rs8059111	16	77416155	Whole blood (CHARGE) [PMID 24013639]	4.88e-10	5310674	MON1B	cis	0.031	0.214	rs8061864	9.81e-198	5310674	MON1B	cis
rs10781986	16	77418329	Whole blood (CHARGE) [PMID 24013639]	5.2e-10	5310674	MON1B	cis	0.031	0.214	rs8061864	9.81e-198	5310674	MON1B	cis
rs10781987	16	77418343	Whole blood (CHARGE) [PMID 24013639]	5.2e-10	5310674	MON1B	cis	0.031	0.214	rs8061864	9.81e-198	5310674	MON1B	cis
rs2840102	16	77419391	Whole blood (CHARGE) [PMID 24013639]	5.2e-10	5310674	MON1B	cis	0.016	0.147	rs8061864	9.81e-198	5310674	MON1B	cis
rs2162954	16	77419427	Whole blood (CHARGE) [PMID 24013639]	5.2e-10	5310674	MON1B	cis	0.031	0.214	rs8061864	9.81e-198	5310674	MON1B	cis
rs12934271	16	77420294	Whole blood (CHARGE) [PMID 24013639]	5.2e-10	5310674	MON1B	cis	0.031	0.214	rs8061864	9.81e-198	5310674	MON1B	cis
rs12934409	16	77420338	Whole blood (CHARGE) [PMID 24013639]	5.2e-10	5310674	MON1B	cis	0.031	0.214	rs8061864	9.81e-198	5310674	MON1B	cis
rs12925727	16	77420581	Whole blood (CHARGE) [PMID 24013639]	5.56e-10	5310674	MON1B	cis	0.031	0.214	rs8061864	9.81e-198	5310674	MON1B	cis
rs919376	16	77421423	Whole blood (CHARGE) [PMID 24013639]	5.56e-10	5310674	MON1B	cis	0.031	0.214	rs8061864	9.81e-198	5310674	MON1B	cis
rs919374	16	77421631	Whole blood (CHARGE) [PMID 24013639]	5.56e-10	5310674	MON1B	cis	0.023	0.179	rs8061864	9.81e-198	5310674	MON1B	cis
rs10781985	16	77418312	Whole blood (CHARGE) [PMID 24013639]	6.16e-10	5310674	MON1B	cis	0.031	0.214	rs8061864	9.81e-198	5310674	MON1B	cis
rs12934271	16	77420294	Peripheral blood mononuclear cells [PMID 26019233]	5.24e-06	ILMN_1771651	MON1B	cis	0.031	0.214	rs12444881	2.47e-100	ILMN_1771651	MON1B	cis
rs8059111	16	77416155	Peripheral blood mononuclear cells [PMID 26019233]	5.55e-06	ILMN_1771651	MON1B	cis	0.031	0.214	rs12444881	2.47e-100	ILMN_1771651	MON1B	cis
rs11149989	16	77417585	Peripheral blood mononuclear cells [PMID 26019233]	5.6e-06	ILMN_1771651	MON1B	cis	0.031	0.214	rs12444881	2.47e-100	ILMN_1771651	MON1B	cis
rs10781985	16	77418312	Peripheral blood mononuclear cells [PMID 26019233]	5.63e-06	ILMN_1771651	MON1B	cis	0.031	0.214	rs12444881	2.47e-100	ILMN_1771651	MON1B	cis
rs10781986	16	77418329	Peripheral blood mononuclear cells [PMID 26019233]	5.63e-06	ILMN_1771651	MON1B	cis	0.031	0.214	rs12444881	2.47e-100	ILMN_1771651	MON1B	cis
rs10781987	16	77418343	Peripheral blood mononuclear cells [PMID 26019233]	5.63e-06	ILMN_1771651	MON1B	cis	0.031	0.214	rs12444881	2.47e-100	ILMN_1771651	MON1B	cis
rs2840102	16	77419391	Peripheral blood mononuclear cells [PMID 26019233]	5.69e-06	ILMN_1771651	MON1B	cis	0.016	0.147	rs12444881	2.47e-100	ILMN_1771651	MON1B	cis
rs2162954	16	77419427	Peripheral blood mononuclear cells [PMID 26019233]	5.69e-06	ILMN_1771651	MON1B	cis	0.031	0.214	rs12444881	2.47e-100	ILMN_1771651	MON1B	cis
rs12934409	16	77420338	Peripheral blood mononuclear cells [PMID 26019233]	5.69e-06	ILMN_1771651	MON1B	cis	0.031	0.214	rs12444881	2.47e-100	ILMN_1771651	MON1B	cis
rs12925727	16	77420581	Peripheral blood mononuclear cells [PMID 26019233]	5.69e-06	ILMN_1771651	MON1B	cis	0.031	0.214	rs12444881	2.47e-100	ILMN_1771651	MON1B	cis
rs919376	16	77421423	Peripheral blood mononuclear cells [PMID 26019233]	5.71e-06	ILMN_1771651	MON1B	cis	0.031	0.214	rs12444881	2.47e-100	ILMN_1771651	MON1B	cis
rs919374	16	77421631	Peripheral blood mononuclear cells [PMID 26019233]	5.72e-06	ILMN_1771651	MON1B	cis	0.023	0.179	rs12444881	2.47e-100	ILMN_1771651	MON1B	cis
rs1530930	7	158429751	Peripheral blood mononuclear cells [PMID 26019233]	0.00234	ILMN_2066756	NCAPG2	cis	0.002	1	rs11514653	9.89e-98	ILMN_2066756	NCAPG2	cis
rs1784859	11	65453277	Aortic endothelial cells (controls, unstimulated)	6.79e-05		NEAT1	cis	0.734	1	rs512715	4.07e-06		NEAT1	cis
rs1784859	11	65453277	Aortic endothelial cells (OxPAPC treated + unstimulated controls)	9.14e-05		NEAT1	cis	0.734	1	rs512715	5.65e-05		NEAT1	cis
rs7090013	10	21155970	Peripheral blood mononuclear cells [PMID 26019233]	1.47e-06	ILMN_1808824	NEBL	cis	0.011	0.126	rs10828209	0	ILMN_1808824	NEBL	cis
rs3860499	3	132431338	CD14+ monocytes (IFNg stimulated) [PMID 24604202]	0.000325	1820746	NPHP3	cis	0.031	0.175	rs11718115	1.63e-12	1820746	NPHP3	cis
rs10455438	6	84782326	Peripheral blood mononuclear cells [PMID 26019233]	0.0019	ILMN_1697220	NT5E	cis	NotFnd	NotFnd	rs12662033	8.16e-120	ILMN_1697220	NT5E	cis
rs6062400	20	62674583	Whole blood (CHARGE) [PMID 24013639]	9.03e-11	2750706	NTSR1	cis	0	0.031	rs2427377	4.23e-45	2750706	NTSR1	cis
rs8059111	16	77416155	Peripheral blood mononuclear cells [PMID 26019233]	0.000148	ILMN_3226181	NUDT7	cis	0.031	0.981	rs3743756	5.74e-209	ILMN_3226181	NUDT7	cis
rs11149989	16	77417585	Peripheral blood mononuclear cells [PMID 26019233]	0.000148	ILMN_3226181	NUDT7	cis	0.031	0.981	rs3743756	5.74e-209	ILMN_3226181	NUDT7	cis
rs10781985	16	77418312	Peripheral blood mononuclear cells [PMID 26019233]	0.000149	ILMN_3226181	NUDT7	cis	0.031	0.981	rs3743756	5.74e-209	ILMN_3226181	NUDT7	cis
rs10781986	16	77418329	Peripheral blood mononuclear cells [PMID 26019233]	0.000149	ILMN_3226181	NUDT7	cis	0.031	0.981	rs3743756	5.74e-209	ILMN_3226181	NUDT7	cis
rs10781987	16	77418343	Peripheral blood mononuclear cells [PMID 26019233]	0.000149	ILMN_3226181	NUDT7	cis	0.031	0.981	rs3743756	5.74e-209	ILMN_3226181	NUDT7	cis
rs2840102	16	77419391	Peripheral blood mononuclear cells [PMID 26019233]	0.00015	ILMN_3226181	NUDT7	cis	0	0	rs3743756	5.74e-209	ILMN_3226181	NUDT7	cis
rs2162954	16	77419427	Peripheral blood mononuclear cells [PMID 26019233]	0.00015	ILMN_3226181	NUDT7	cis	0.031	0.981	rs3743756	5.74e-209	ILMN_3226181	NUDT7	cis
rs12934409	16	77420338	Peripheral blood mononuclear cells [PMID 26019233]	0.00015	ILMN_3226181	NUDT7	cis	0.031	0.981	rs3743756	5.74e-209	ILMN_3226181	NUDT7	cis
rs12925727	16	77420581	Peripheral blood mononuclear cells [PMID 26019233]	0.00015	ILMN_3226181	NUDT7	cis	0.031	0.981	rs3743756	5.74e-209	ILMN_3226181	NUDT7	cis
rs919376	16	77421423	Peripheral blood mononuclear cells [PMID 26019233]	0.00015	ILMN_3226181	NUDT7	cis	0.031	0.981	rs3743756	5.74e-209	ILMN_3226181	NUDT7	cis
rs919374	16	77421631	Peripheral blood mononuclear cells [PMID 26019233]	0.00015	ILMN_3226181	NUDT7	cis	0.007	0.463	rs3743756	5.74e-209	ILMN_3226181	NUDT7	cis
rs12934271	16	77420294	Peripheral blood mononuclear cells [PMID 26019233]	0.000157	ILMN_3226181	NUDT7	cis	0.031	0.981	rs3743756	5.74e-209	ILMN_3226181	NUDT7	cis
rs16823011	2	182291058	Subc adipose (MuTHER) [PMID 22941192]	7.42e-07	ILMN_1778924	PDE1A	cis	0.81	0.9	rs10930999	1.06e-09	ILMN_1778924	PDE1A	cis
rs16823010	2	182290836	Subc adipose (MuTHER) [PMID 22941192]	8.54e-07	ILMN_1778924	PDE1A	cis	0.763	0.895	rs10930999	1.06e-09	ILMN_1778924	PDE1A	cis
rs12562454	1	26344592	CD14+ monocytes (IFNg stimulated) [PMID 24604202]	0.000498	5820427	PDIK1L	cis	0.001	0.024	rs3008226	4.67e-09	5820427	PDIK1L	cis
rs3800318	6	27295861	Peripheral blood mononuclear cells [PMID 26019233]	1.62e-05	ILMN_1791949	PGBD1	cis	NotFnd	NotFnd	rs1778484	8.93e-24	ILMN_1791949	PGBD1	cis
rs2893910	6	27315474	Peripheral blood mononuclear cells [PMID 26019233]	1.95e-05	ILMN_1791949	PGBD1	cis	NotFnd	NotFnd	rs1778484	8.93e-24	ILMN_1791949	PGBD1	cis
rs7746199	6	27293544	Peripheral blood mononuclear cells [PMID 26019233]	2.21e-05	ILMN_1791949	PGBD1	cis	NotFnd	NotFnd	rs1778484	8.93e-24	ILMN_1791949	PGBD1	cis
rs13211166	6	27298160	Peripheral blood mononuclear cells [PMID 26019233]	4.47e-05	ILMN_1791949	PGBD1	cis	NotFnd	NotFnd	rs1778484	8.93e-24	ILMN_1791949	PGBD1	cis
rs13207082	6	27283599	Peripheral blood mononuclear cells [PMID 26019233]	5.26e-05	ILMN_1791949	PGBD1	cis	NotFnd	NotFnd	rs1778484	8.93e-24	ILMN_1791949	PGBD1	cis
rs16897515	6	27310240	Peripheral blood mononuclear cells [PMID 26019233]	8.91e-05	ILMN_1791949	PGBD1	cis	NotFnd	NotFnd	rs1778484	8.93e-24	ILMN_1791949	PGBD1	cis
rs1223581	10	93985835	Subc adipose (MuTHER) [PMID 22941192]	3.14e-20	ILMN_1784447	PLCE1	cis	0.783	0.962	rs829232	2.06e-25	ILMN_1784447	PLCE1	cis
rs1784859	11	65453277	Peripheral blood mononuclear cells [PMID 26019233]	1.61e-05	ILMN_1696713	POLA2	cis	0.101	0.618	rs626555	4.85e-32	ILMN_1696713	POLA2	cis
rs2846861	11	65454833	Peripheral blood mononuclear cells [PMID 26019233]	1.67e-05	ILMN_1696713	POLA2	cis	0.101	0.618	rs626555	4.85e-32	ILMN_1696713	POLA2	cis
rs1626021	11	65458715	Peripheral blood mononuclear cells [PMID 26019233]	2.23e-05	ILMN_1696713	POLA2	cis	0.101	0.618	rs626555	4.85e-32	ILMN_1696713	POLA2	cis
rs535154	18	54317404	Normal prostate [PMID 25983244]	5.82e-38		POLI	cis	0.292	1	rs10048321	5.06e-67		POLI	cis
rs664501	18	54316533	Peripheral blood mononuclear cells [PMID 26019233]	8.42e-23	ILMN_1702218	POLI	cis	0.337	1	rs11083047	7.66e-39	ILMN_1702218	POLI	cis
rs535154	18	54317404	Peripheral blood mononuclear cells [PMID 26019233]	8.94e-23	ILMN_1702218	POLI	cis	0.323	1	rs11083047	7.66e-39	ILMN_1702218	POLI	cis
rs1787828	18	54317424	Peripheral blood mononuclear cells [PMID 26019233]	8.95e-23	ILMN_1702218	POLI	cis	0.337	1	rs11083047	7.66e-39	ILMN_1702218	POLI	cis
rs649722	18	54317535	Peripheral blood mononuclear cells [PMID 26019233]	5.33e-22	ILMN_1702218	POLI	cis	0.323	1	rs11083047	7.66e-39	ILMN_1702218	POLI	cis
rs1787824	18	54356731	Peripheral blood mononuclear cells [PMID 26019233]	1.2e-18	ILMN_1702218	POLI	cis	0.275	0.835	rs11083047	7.66e-39	ILMN_1702218	POLI	cis
rs1657890	18	54349494	Peripheral blood mononuclear cells [PMID 26019233]	1.64e-17	ILMN_1702218	POLI	cis	0.275	0.835	rs11083047	7.66e-39	ILMN_1702218	POLI	cis
rs1787828	18	54317424	Cerebellum (ScanDB) [PMID 22212596]	3.98e-10		POLI	cis	0.337	1	rs11083046	8.49e-13		POLI	cis
rs1787824	18	54356731	Cerebellum (ScanDB) [PMID 22212596]	1.33e-08		POLI	cis	0.275	0.835	rs11083046	8.49e-13		POLI	cis
rs1787828	18	54317424	Parietal lobe (ScanDB) [PMID 22212596]	1.98e-08		POLI	cis	0.337	1	rs3730783	5.83e-16		POLI	cis
rs1787824	18	54356731	Parietal lobe (ScanDB) [PMID 22212596]	8.65e-07		POLI	cis	0.275	0.835	rs3730783	5.83e-16		POLI	cis
rs3800307	6	27218012	Whole blood (Battle) [PMID 24092820]	6.34e-40		PRSS16	cis	SameSNP	SameSNP	rs3800307	6.34e-40		PRSS16	cis
rs6938200	6	27263370	SubCutAdipose(Greenawalt) [PMID 21602305]	5.33e-11	10025912026	PRSS16	cis	SameSNP	SameSNP	rs6938200	5.33e-11	10025912026	PRSS16	cis
rs6938200	6	27263370	CD4+lymph [PMID 20833654]	2.19e-10		PRSS16	cis	SameSNP	SameSNP	rs6938200	2.19e-10		PRSS16	cis
rs3800307	6	27218012	Whole blood (CHARGE) [PMID 24013639]	6.78e-08	430768	PRSS16	cis	SameSNP	SameSNP	rs3800307	6.78e-08	430768	PRSS16	cis
rs6938200	6	27263370	Whole blood (CHARGE) [PMID 24013639]	1.77e-07	430768	PRSS16	cis	0.947	1	rs3800307	6.78e-08	430768	PRSS16	cis
rs6938200	6	27263370	Cerebellum (all samples) [PMID 23622250]	1.16e-06	10025912026	PRSS16	cis	SameSNP	SameSNP	rs6938200	1.16e-06	10025912026	PRSS16	cis
rs6938200	6	27263370	Cerebellum (Alzheimer's) [PMID 23622250]	3.63e-06	10025912026	PRSS16	cis	SameSNP	SameSNP	rs6938200	3.63e-06	10025912026	PRSS16	cis
rs6904071	6	27079476	Bcells (CD19+) [PMID 22446964]	5.84e-06	Hd353lOnP1Hnc.eHdM	PRSS16	cis	SameSNP	SameSNP	rs6904071	5.84e-06	Hd353lOnP1Hnc.eHdM	PRSS16	cis
rs6913660	6	27123645	Bcells (CD19+) [PMID 22446964]	5.84e-06	Hd353lOnP1Hnc.eHdM	PRSS16	cis	1	1	rs6904071	5.84e-06	Hd353lOnP1Hnc.eHdM	PRSS16	cis
rs13194053	6	27176103	Bcells (CD19+) [PMID 22446964]	6.62e-06	Hd353lOnP1Hnc.eHdM	PRSS16	cis	1	1	rs6904071	5.84e-06	Hd353lOnP1Hnc.eHdM	PRSS16	cis
rs7746199	6	27293544	CD4+lymph [PMID 20833654]	0.000295		PRSS16	cis	0.592	0.923	rs6938200	2.19e-10		PRSS16	cis
rs3749985	6	33086655	Peripheral blood mononuclear cells [PMID 26019233]	6.9e-11	ILMN_1798233	PSMB9	cis	NotFnd	NotFnd	rs2071477	5.58e-281	ILMN_1798233	PSMB9	cis
rs9501255	6	33087320	Peripheral blood mononuclear cells [PMID 26019233]	6.95e-11	ILMN_1798233	PSMB9	cis	NotFnd	NotFnd	rs2071477	5.58e-281	ILMN_1798233	PSMB9	cis
rs7763822	6	33092650	Peripheral blood mononuclear cells [PMID 26019233]	1.31e-10	ILMN_1798233	PSMB9	cis	NotFnd	NotFnd	rs2071477	5.58e-281	ILMN_1798233	PSMB9	cis
rs9501263	6	33089573	Peripheral blood mononuclear cells [PMID 26019233]	1.92e-10	ILMN_1798233	PSMB9	cis	NotFnd	NotFnd	rs2071477	5.58e-281	ILMN_1798233	PSMB9	cis
rs9469357	6	33106839	Peripheral blood mononuclear cells [PMID 26019233]	2.42e-10	ILMN_1798233	PSMB9	cis	NotFnd	NotFnd	rs2071477	5.58e-281	ILMN_1798233	PSMB9	cis
rs3135195	6	33031552	Peripheral blood mononuclear cells [PMID 26019233]	1.27e-06	ILMN_1798233	PSMB9	cis	NotFnd	NotFnd	rs2071477	5.58e-281	ILMN_1798233	PSMB9	cis
rs367645	6	33056721	Peripheral blood mononuclear cells [PMID 26019233]	1.69e-05	ILMN_1798233	PSMB9	cis	NotFnd	NotFnd	rs2071477	5.58e-281	ILMN_1798233	PSMB9	cis
rs7763822	6	33092650	CD14+ monocytes (IFNg stimulated) [PMID 24604202]	4.88e-05	6450692	PSMB9	cis	NotFnd	NotFnd	rs1351382	4.43e-119	6450692	PSMB9	cis
rs17527406	6	33709544	Peripheral blood mononuclear cells [PMID 26019233]	5.66e-05	ILMN_1798233	PSMB9	cis	NotFnd	NotFnd	rs2071477	5.58e-281	ILMN_1798233	PSMB9	cis
rs210181	6	33517843	Peripheral blood mononuclear cells [PMID 26019233]	5.74e-05	ILMN_1798233	PSMB9	cis	NotFnd	NotFnd	rs2071477	5.58e-281	ILMN_1798233	PSMB9	cis
rs7763822	6	33092650	CD14+ monocytes (untreated) [PMID 24604202]	0.000486	6450692	PSMB9	cis	NotFnd	NotFnd	rs1351382	3.8e-83	6450692	PSMB9	cis
rs9296088	6	33157964	Peripheral blood mononuclear cells [PMID 26019233]	0.000557	ILMN_1798233	PSMB9	cis	NotFnd	NotFnd	rs2071477	5.58e-281	ILMN_1798233	PSMB9	cis
rs2425544	20	43037738	Liver(Greenawalt) [PMID 21602305]	1.76e-11	10025910767	PTPRT	cis	SameSNP	SameSNP	rs2425544	1.76e-11	10025910767	PTPRT	cis
rs4422272	3	113927809	CD14+ monocytes (IFNg stimulated) [PMID 24604202]	0.000562	2490204	QTRTD1	cis	0.045	0.477	rs2632241	5.19e-13	2490204	QTRTD1	cis
rs9789419	2	136655491	CD14+ monocytes (untreated) [PMID 24604202]	0.00113	1410044	R3HDM1	cis	0.524	1	rs1374111	1.96e-05	1410044	R3HDM1	cis
rs10949183	6	60702790	Peripheral blood mononuclear cells [PMID 26019233]	3.1e-05	ILMN_2346997	RAB23	cis	NotFnd	NotFnd	rs16888392	3.52e-203	ILMN_2346997	RAB23	cis
rs4616982	6	60952741	Peripheral blood mononuclear cells [PMID 26019233]	0.000163	ILMN_2346997	RAB23	cis	NotFnd	NotFnd	rs16888392	3.52e-203	ILMN_2346997	RAB23	cis
rs4715866	6	60944027	Peripheral blood mononuclear cells [PMID 26019233]	0.000185	ILMN_2346997	RAB23	cis	NotFnd	NotFnd	rs16888392	3.52e-203	ILMN_2346997	RAB23	cis
rs3125361	6	60950938	Peripheral blood mononuclear cells [PMID 26019233]	0.000185	ILMN_2346997	RAB23	cis	NotFnd	NotFnd	rs16888392	3.52e-203	ILMN_2346997	RAB23	cis
rs1953711	6	60965061	Peripheral blood mononuclear cells [PMID 26019233]	0.000219	ILMN_2346997	RAB23	cis	NotFnd	NotFnd	rs16888392	3.52e-203	ILMN_2346997	RAB23	cis
rs2340641	6	60968550	Peripheral blood mononuclear cells [PMID 26019233]	0.000219	ILMN_2346997	RAB23	cis	NotFnd	NotFnd	rs16888392	3.52e-203	ILMN_2346997	RAB23	cis
rs1856253	6	60990914	Peripheral blood mononuclear cells [PMID 26019233]	0.00022	ILMN_2346997	RAB23	cis	NotFnd	NotFnd	rs16888392	3.52e-203	ILMN_2346997	RAB23	cis
rs4960492	6	60992549	Peripheral blood mononuclear cells [PMID 26019233]	0.00022	ILMN_2346997	RAB23	cis	NotFnd	NotFnd	rs16888392	3.52e-203	ILMN_2346997	RAB23	cis
rs1337897	6	61088179	Peripheral blood mononuclear cells [PMID 26019233]	0.000228	ILMN_2346997	RAB23	cis	NotFnd	NotFnd	rs16888392	3.52e-203	ILMN_2346997	RAB23	cis
rs13209368	6	60700012	Peripheral blood mononuclear cells [PMID 26019233]	0.000248	ILMN_2346997	RAB23	cis	NotFnd	NotFnd	rs16888392	3.52e-203	ILMN_2346997	RAB23	cis
rs6937023	6	60701253	Peripheral blood mononuclear cells [PMID 26019233]	0.000248	ILMN_2346997	RAB23	cis	NotFnd	NotFnd	rs16888392	3.52e-203	ILMN_2346997	RAB23	cis
rs4426992	6	60703280	Peripheral blood mononuclear cells [PMID 26019233]	0.000248	ILMN_2346997	RAB23	cis	NotFnd	NotFnd	rs16888392	3.52e-203	ILMN_2346997	RAB23	cis
rs7765475	6	60705649	Peripheral blood mononuclear cells [PMID 26019233]	0.000248	ILMN_2346997	RAB23	cis	NotFnd	NotFnd	rs16888392	3.52e-203	ILMN_2346997	RAB23	cis
rs6940900	6	60714265	Peripheral blood mononuclear cells [PMID 26019233]	0.000251	ILMN_2346997	RAB23	cis	NotFnd	NotFnd	rs16888392	3.52e-203	ILMN_2346997	RAB23	cis
rs1337895	6	61043532	Peripheral blood mononuclear cells [PMID 26019233]	0.000279	ILMN_2346997	RAB23	cis	NotFnd	NotFnd	rs16888392	3.52e-203	ILMN_2346997	RAB23	cis
rs1123892	6	61046495	Peripheral blood mononuclear cells [PMID 26019233]	0.00028	ILMN_2346997	RAB23	cis	NotFnd	NotFnd	rs16888392	3.52e-203	ILMN_2346997	RAB23	cis
rs3904828	6	61054808	Peripheral blood mononuclear cells [PMID 26019233]	0.000286	ILMN_2346997	RAB23	cis	NotFnd	NotFnd	rs16888392	3.52e-203	ILMN_2346997	RAB23	cis
rs4960510	6	61087484	Peripheral blood mononuclear cells [PMID 26019233]	0.000286	ILMN_2346997	RAB23	cis	NotFnd	NotFnd	rs16888392	3.52e-203	ILMN_2346997	RAB23	cis
rs6459322	6	61057255	Peripheral blood mononuclear cells [PMID 26019233]	0.000287	ILMN_2346997	RAB23	cis	NotFnd	NotFnd	rs16888392	3.52e-203	ILMN_2346997	RAB23	cis
rs9370718	6	61079906	Peripheral blood mononuclear cells [PMID 26019233]	0.000288	ILMN_2346997	RAB23	cis	NotFnd	NotFnd	rs16888392	3.52e-203	ILMN_2346997	RAB23	cis
rs3851534	6	61063276	Peripheral blood mononuclear cells [PMID 26019233]	0.000289	ILMN_2346997	RAB23	cis	NotFnd	NotFnd	rs16888392	3.52e-203	ILMN_2346997	RAB23	cis
rs9358022	6	61066175	Peripheral blood mononuclear cells [PMID 26019233]	0.00029	ILMN_2346997	RAB23	cis	NotFnd	NotFnd	rs16888392	3.52e-203	ILMN_2346997	RAB23	cis
rs1933175	6	61093092	Peripheral blood mononuclear cells [PMID 26019233]	0.000292	ILMN_2346997	RAB23	cis	NotFnd	NotFnd	rs16888392	3.52e-203	ILMN_2346997	RAB23	cis
rs4487631	6	61097990	Peripheral blood mononuclear cells [PMID 26019233]	0.000292	ILMN_2346997	RAB23	cis	NotFnd	NotFnd	rs16888392	3.52e-203	ILMN_2346997	RAB23	cis
rs3904827	6	61078023	Peripheral blood mononuclear cells [PMID 26019233]	0.000296	ILMN_2346997	RAB23	cis	NotFnd	NotFnd	rs16888392	3.52e-203	ILMN_2346997	RAB23	cis
rs4039843	6	61104370	Peripheral blood mononuclear cells [PMID 26019233]	0.000303	ILMN_2346997	RAB23	cis	NotFnd	NotFnd	rs16888392	3.52e-203	ILMN_2346997	RAB23	cis
rs6459297	6	60669512	Peripheral blood mononuclear cells [PMID 26019233]	0.000304	ILMN_2346997	RAB23	cis	NotFnd	NotFnd	rs16888392	3.52e-203	ILMN_2346997	RAB23	cis
rs4629677	6	60686928	Peripheral blood mononuclear cells [PMID 26019233]	0.000332	ILMN_2346997	RAB23	cis	NotFnd	NotFnd	rs16888392	3.52e-203	ILMN_2346997	RAB23	cis
rs4639340	6	60665121	Peripheral blood mononuclear cells [PMID 26019233]	0.000333	ILMN_2346997	RAB23	cis	NotFnd	NotFnd	rs16888392	3.52e-203	ILMN_2346997	RAB23	cis
rs4392725	6	60666094	Peripheral blood mononuclear cells [PMID 26019233]	0.000333	ILMN_2346997	RAB23	cis	NotFnd	NotFnd	rs16888392	3.52e-203	ILMN_2346997	RAB23	cis
rs6459298	6	60673846	Peripheral blood mononuclear cells [PMID 26019233]	0.000333	ILMN_2346997	RAB23	cis	NotFnd	NotFnd	rs16888392	3.52e-203	ILMN_2346997	RAB23	cis
rs6459301	6	60677078	Peripheral blood mononuclear cells [PMID 26019233]	0.000333	ILMN_2346997	RAB23	cis	NotFnd	NotFnd	rs16888392	3.52e-203	ILMN_2346997	RAB23	cis
rs4355613	6	60677521	Peripheral blood mononuclear cells [PMID 26019233]	0.000333	ILMN_2346997	RAB23	cis	NotFnd	NotFnd	rs16888392	3.52e-203	ILMN_2346997	RAB23	cis
rs6459302	6	60679165	Peripheral blood mononuclear cells [PMID 26019233]	0.000333	ILMN_2346997	RAB23	cis	NotFnd	NotFnd	rs16888392	3.52e-203	ILMN_2346997	RAB23	cis
rs4715852	6	60680066	Peripheral blood mononuclear cells [PMID 26019233]	0.000333	ILMN_2346997	RAB23	cis	NotFnd	NotFnd	rs16888392	3.52e-203	ILMN_2346997	RAB23	cis
rs9396408	6	60684055	Peripheral blood mononuclear cells [PMID 26019233]	0.000333	ILMN_2346997	RAB23	cis	NotFnd	NotFnd	rs16888392	3.52e-203	ILMN_2346997	RAB23	cis
rs4415148	6	60640960	Peripheral blood mononuclear cells [PMID 26019233]	0.000527	ILMN_2346997	RAB23	cis	NotFnd	NotFnd	rs16888392	3.52e-203	ILMN_2346997	RAB23	cis
rs4236161	6	60627127	Peripheral blood mononuclear cells [PMID 26019233]	0.000529	ILMN_2346997	RAB23	cis	NotFnd	NotFnd	rs16888392	3.52e-203	ILMN_2346997	RAB23	cis
rs6920754	6	60628553	Peripheral blood mononuclear cells [PMID 26019233]	0.000529	ILMN_2346997	RAB23	cis	NotFnd	NotFnd	rs16888392	3.52e-203	ILMN_2346997	RAB23	cis
rs9283922	6	60613324	Peripheral blood mononuclear cells [PMID 26019233]	0.000532	ILMN_2346997	RAB23	cis	NotFnd	NotFnd	rs16888392	3.52e-203	ILMN_2346997	RAB23	cis
rs7758698	6	60614159	Peripheral blood mononuclear cells [PMID 26019233]	0.000532	ILMN_2346997	RAB23	cis	NotFnd	NotFnd	rs16888392	3.52e-203	ILMN_2346997	RAB23	cis
rs6459291	6	60612717	Peripheral blood mononuclear cells [PMID 26019233]	0.000537	ILMN_2346997	RAB23	cis	NotFnd	NotFnd	rs16888392	3.52e-203	ILMN_2346997	RAB23	cis
rs4636030	6	60609245	Peripheral blood mononuclear cells [PMID 26019233]	0.00164	ILMN_2346997	RAB23	cis	NotFnd	NotFnd	rs16888392	3.52e-203	ILMN_2346997	RAB23	cis
rs5009936	6	60606248	Peripheral blood mononuclear cells [PMID 26019233]	0.00165	ILMN_2346997	RAB23	cis	NotFnd	NotFnd	rs16888392	3.52e-203	ILMN_2346997	RAB23	cis
rs4236162	6	60649355	Peripheral blood mononuclear cells [PMID 26019233]	0.00168	ILMN_2346997	RAB23	cis	NotFnd	NotFnd	rs16888392	3.52e-203	ILMN_2346997	RAB23	cis
rs2498197	6	60570655	Peripheral blood mononuclear cells [PMID 26019233]	0.00169	ILMN_2346997	RAB23	cis	NotFnd	NotFnd	rs16888392	3.52e-203	ILMN_2346997	RAB23	cis
rs2498201	6	60571702	Peripheral blood mononuclear cells [PMID 26019233]	0.00169	ILMN_2346997	RAB23	cis	NotFnd	NotFnd	rs16888392	3.52e-203	ILMN_2346997	RAB23	cis
rs2498205	6	60572974	Peripheral blood mononuclear cells [PMID 26019233]	0.00169	ILMN_2346997	RAB23	cis	0.005	0.404	rs16888392	3.52e-203	ILMN_2346997	RAB23	cis
rs12206108	6	60564556	Peripheral blood mononuclear cells [PMID 26019233]	0.0017	ILMN_2346997	RAB23	cis	NotFnd	NotFnd	rs16888392	3.52e-203	ILMN_2346997	RAB23	cis
rs12202781	6	60531634	Peripheral blood mononuclear cells [PMID 26019233]	0.00251	ILMN_2346997	RAB23	cis	NotFnd	NotFnd	rs16888392	3.52e-203	ILMN_2346997	RAB23	cis
rs10155690	6	60917046	Peripheral blood mononuclear cells [PMID 26019233]	0.00275	ILMN_2346997	RAB23	cis	NotFnd	NotFnd	rs16888392	3.52e-203	ILMN_2346997	RAB23	cis
rs1190715	14	101556741	CD14+ monocytes (24h LPS stimulated) [PMID 24604202]	0.000468	1470348	RAGE	cis	NotFnd	NotFnd	rs7152076	2.35e-09	1470348	RAGE	cis
rs4714870	6	12796822	CD14+ monocytes (2h LPS stimulated) [PMID 24604202]	0.000144	4610349	RANBP9	cis	0.307	0.674	rs1360579	7.22e-05	4610349	RANBP9	cis
rs1953089	6	12804386	CD14+ monocytes (2h LPS stimulated) [PMID 24604202]	0.000177	4610349	RANBP9	cis	0.307	0.674	rs1360579	7.22e-05	4610349	RANBP9	cis
rs507163	18	36327664	Glioblastoma multiforme (brain, Shpak et al.) [PMID 24607568]	2.33e-08	208530_s_at	RARB	trans	NotFnd	NotFnd	rs17331131	1.8e-08	208530_s_at	RARB	trans
rs12620314	2	178163223	Peripheral blood mononuclear cells [PMID 26019233]	2.65e-08	ILMN_1680378	RBM45	cis	0.345	0.925	rs334068	1.1e-26	ILMN_1680378	RBM45	cis
rs12620314	2	178163223	Peripheral blood mononuclear cells [PMID 26019233]	9.15e-05	ILMN_1823112	RBM45	cis	0.345	0.925	rs334068	1.1e-26	ILMN_1680378	RBM45	cis
rs3135195	6	33031552	Peripheral blood mononuclear cells [PMID 26019233]	6.98e-10	ILMN_1765532	RDBP	trans	NotFnd	NotFnd	rs760070	1.58e-71	ILMN_1765532	RDBP	cis
rs3749985	6	33086655	Peripheral blood mononuclear cells [PMID 26019233]	0.00208	ILMN_1666399	RING1	cis	NotFnd	NotFnd	Affx-28515343	6.18e-16	ILMN_1666399	RING1	cis
rs9501255	6	33087320	Peripheral blood mononuclear cells [PMID 26019233]	0.00208	ILMN_1666399	RING1	cis	NotFnd	NotFnd	Affx-28515343	6.18e-16	ILMN_1666399	RING1	cis
rs7763822	6	33092650	Peripheral blood mononuclear cells [PMID 26019233]	0.00208	ILMN_1666399	RING1	cis	NotFnd	NotFnd	Affx-28515343	6.18e-16	ILMN_1666399	RING1	cis
rs9787358	1	201928541	Whole blood (CHARGE) [PMID 24013639]	5.62e-09	5570601	RNPEP	cis	0.047	0.337	rs11586632	9.81e-198	5570601	RNPEP	cis
rs6902211	6	25767208	Subc adipose (MuTHER) [PMID 22941192]	4.48e-05	ILMN_1789648	SCGN	cis	0.071	1	rs4712954	1.32e-41	ILMN_1789648	SCGN	cis
rs12562454	1	26344592	CD14+ monocytes (24h LPS stimulated) [PMID 24604202]	0.000369	1780402	SEPN1	cis	NotFnd	NotFnd	rs807245	8.9e-21	1780402	SEPN1	cis
rs12562454	1	26344592	CD14+ monocytes (2h LPS stimulated) [PMID 24604202]	0.000596	780162	SEPN1	cis	NotFnd	NotFnd	rs7271825	5.31e-14	1780402	SEPN1	trans
rs605359	1	37762543	Peripheral blood mononuclear cells [PMID 26019233]	0.000707	ILMN_1705151	SF3A3	cis	0.122	0.754	rs10890238	2.65e-68	ILMN_1705151	SF3A3	cis
rs12562454	1	26344592	CD14+ monocytes (untreated) [PMID 24604202]	0.00052	6280240	SH3BGRL3	cis	0.059	1	rs1071849	1.94e-62	6280240	SH3BGRL3	cis
rs11247921	1	26339110	Peripheral blood mononuclear cells [PMID 26019233]	0.00229	ILMN_1737163	SH3BGRL3	cis	0.04	1	rs12090258	1.63e-51	ILMN_1737163	SH3BGRL3	cis
rs3135195	6	33031552	Peripheral blood mononuclear cells [PMID 26019233]	1.87e-12	ILMN_1666512	SKIV2L	trans	NotFnd	NotFnd	rs449643	1e-158	ILMN_1666512	SKIV2L	cis
rs367645	6	33056721	Peripheral blood mononuclear cells [PMID 26019233]	9.79e-10	ILMN_1666512	SKIV2L	trans	NotFnd	NotFnd	rs449643	1e-158	ILMN_1666512	SKIV2L	cis
rs9277002	6	33021995	Peripheral blood mononuclear cells [PMID 26019233]	2.13e-08	ILMN_1666512	SKIV2L	trans	NotFnd	NotFnd	rs449643	1e-158	ILMN_1666512	SKIV2L	cis
rs210181	6	33517843	Peripheral blood mononuclear cells [PMID 26019233]	7.41e-08	ILMN_1666512	SKIV2L	trans	NotFnd	NotFnd	rs449643	1e-158	ILMN_1666512	SKIV2L	cis
rs11247921	1	26339110	Skin (MuTHER) [PMID 22941192]	1.69e-05	ILMN_2415421	SLC30A2	cis	0.001	0.042	rs1335759	9.72e-07	ILMN_2415421	SLC30A2	cis
rs12562454	1	26344592	Skin (MuTHER) [PMID 22941192]	3.37e-05	ILMN_2415421	SLC30A2	cis	0.001	0.042	rs1335759	9.72e-07	ILMN_2415421	SLC30A2	cis
rs12904129	15	91708327	Prefrontal cortex (normal samples) [PMID 23622250]	8.7e-05	10025929013	SLCO3A1	cis	0.719	0.958	rs4267286	3.25e-06	10025929013	SLCO3A1	cis
rs10511909	9	33132519	Peripheral blood mononuclear cells [PMID 26019233]	0.00256	ILMN_1764803	SMU1	cis	0.064	0.573	rs581450	8.01e-23	ILMN_1764803	SMU1	cis
rs7955592	12	29625101	3 tissue meta-analysis (PBMC in eczema families, LCL from asthma families, normal skin) [PMID 25951796]	0.000414	1557813_at	SSBP2	trans	SameSNP	SameSNP	rs7955592	0.000414	1557813_at	SSBP2	trans
rs2505899	10	29600772	Peripheral blood mononuclear cells [PMID 26019233]	7.15e-05	ILMN_1671404	SVIL	cis	0.002	0.063	rs3006562	8.03e-60	ILMN_1671404	SVIL	cis
rs2488682	10	29600511	Peripheral blood mononuclear cells [PMID 26019233]	7.16e-05	ILMN_1671404	SVIL	cis	0.002	0.063	rs3006562	8.03e-60	ILMN_1671404	SVIL	cis
rs2505898	10	29600760	Peripheral blood mononuclear cells [PMID 26019233]	7.94e-05	ILMN_1671404	SVIL	cis	0.002	0.063	rs3006562	8.03e-60	ILMN_1671404	SVIL	cis
rs2505900	10	29601337	Peripheral blood mononuclear cells [PMID 26019233]	8.09e-05	ILMN_1671404	SVIL	cis	0.002	0.063	rs3006562	8.03e-60	ILMN_1671404	SVIL	cis
rs2488683	10	29600319	Peripheral blood mononuclear cells [PMID 26019233]	0.000111	ILMN_1671404	SVIL	cis	0.002	0.063	rs3006562	8.03e-60	ILMN_1671404	SVIL	cis
rs4807650	19	4821599	Peripheral blood mononuclear cells [PMID 26019233]	1.93e-19	ILMN_1815079	TICAM1	cis	0.57	0.909	rs11667267	2.89e-33	ILMN_1724863	TICAM1	cis
rs4807650	19	4821599	Peripheral blood mononuclear cells [PMID 26019233]	8.13e-17	ILMN_1724863	TICAM1	cis	0.57	0.909	rs11667267	2.89e-33	ILMN_1724863	TICAM1	cis
rs4807650	19	4821599	Whole blood (CHARGE) [PMID 24013639]	2.11e-14	5570730	TICAM1	cis	0.528	0.831	rs4807000	1.7e-36	5570730	TICAM1	cis
rs4807650	19	4821599	CD14+ monocytes (IFNg stimulated) [PMID 24604202]	1.02e-09	3360291	TICAM1	cis	0.504	0.825	rs6510827	1.38e-17	3360291	TICAM1	cis
rs4807650	19	4821599	CD14+ monocytes (IFNg stimulated) [PMID 24604202]	7.7e-06	5570730	TICAM1	cis	0.504	0.825	rs6510827	1.38e-17	3360291	TICAM1	cis
rs4807650	19	4821599	CD14+ monocytes (2h LPS stimulated) [PMID 24604202]	1.63e-05	3360291	TICAM1	cis	0.068	0.342	rs4807651	1.28e-08	3360291	TICAM1	cis
rs4807650	19	4821599	CD14+ monocytes (untreated) [PMID 24604202]	1.76e-05	5570730	TICAM1	cis	0.504	0.825	rs6510827	7.53e-12	5570730	TICAM1	cis
rs4807650	19	4821599	CD14+ monocytes (untreated) [PMID 24604202]	4.91e-05	3360291	TICAM1	cis	0.504	0.825	rs6510827	7.53e-12	5570730	TICAM1	cis
rs842360	2	134590314	Peripheral blood mononuclear cells [PMID 26019233]	1.51e-22	ILMN_1751901	TMEM163	cis	0.85	0.922	rs6430529	3.82e-24	ILMN_1751901	TMEM163	cis
rs842358	2	134587538	Peripheral blood mononuclear cells [PMID 26019233]	2.2e-22	ILMN_1751901	TMEM163	cis	0.85	0.922	rs6430529	3.82e-24	ILMN_1751901	TMEM163	cis
rs842360	2	134590314	Parietal lobe (ScanDB) [PMID 22212596]	5.18e-07		TMEM163	cis	0.3	0.715	rs1979033	4.89e-11		TMEM163	cis
rs842358	2	134587538	Parietal lobe (ScanDB) [PMID 22212596]	5.3e-07		TMEM163	cis	0.3	0.715	rs1979033	4.89e-11		TMEM163	cis
rs12562454	1	26344592	CD14+ monocytes (2h LPS stimulated) [PMID 24604202]	0.000211	540193	TMEM50A	cis	NotFnd	NotFnd	rs8876	1.49e-05	540193	TMEM50A	cis
rs2901790	3	172484659	Peripheral blood mononuclear cells [PMID 26019233]	1.73e-06	ILMN_1801307	TNFSF10	cis	0.103	0.824	rs3819773	3.76e-19	ILMN_1801307	TNFSF10	cis
rs7763390	6	28746983	Peripheral blood mononuclear cells [PMID 26019233]	7.71e-05	ILMN_1730005	TRIM27	cis	NotFnd	NotFnd	rs9257403	1.05e-22	ILMN_1730005	TRIM27	cis
rs1892250	6	25768795	Peripheral blood mononuclear cells [PMID 26019233]	4.18e-19	ILMN_1697971	TRIM38	cis	0.023	0.537	rs115810	1.79e-171	ILMN_1697971	TRIM38	cis
rs6902211	6	25767208	Peripheral blood mononuclear cells [PMID 26019233]	1.28e-18	ILMN_1697971	TRIM38	cis	0.023	0.537	rs115810	1.79e-171	ILMN_1697971	TRIM38	cis
rs4712969	6	25763963	Peripheral blood mononuclear cells [PMID 26019233]	1.34e-18	ILMN_1697971	TRIM38	cis	0.032	0.609	rs115810	1.79e-171	ILMN_1697971	TRIM38	cis
rs4236040	6	25760980	Peripheral blood mononuclear cells [PMID 26019233]	1.39e-18	ILMN_1697971	TRIM38	cis	0.042	0.651	rs115810	1.79e-171	ILMN_1697971	TRIM38	cis
rs972087	6	25872350	Peripheral blood mononuclear cells [PMID 26019233]	1.84e-18	ILMN_1697971	TRIM38	cis	0.032	0.592	rs115810	1.79e-171	ILMN_1697971	TRIM38	cis
rs926300	6	27091663	Peripheral blood mononuclear cells [PMID 26019233]	1.27e-13	ILMN_1697971	TRIM38	trans	NotFnd	NotFnd	rs115810	1.79e-171	ILMN_1697971	TRIM38	cis
rs6913660	6	27123645	Peripheral blood mononuclear cells [PMID 26019233]	1.31e-13	ILMN_1697971	TRIM38	trans	NotFnd	NotFnd	rs115810	1.79e-171	ILMN_1697971	TRIM38	cis
rs13219181	6	27168445	Peripheral blood mononuclear cells [PMID 26019233]	1.41e-13	ILMN_1697971	TRIM38	trans	NotFnd	NotFnd	rs115810	1.79e-171	ILMN_1697971	TRIM38	cis
rs13207082	6	27283599	Peripheral blood mononuclear cells [PMID 26019233]	1.53e-13	ILMN_1697971	TRIM38	trans	NotFnd	NotFnd	rs115810	1.79e-171	ILMN_1697971	TRIM38	cis
rs13194053	6	27176103	Peripheral blood mononuclear cells [PMID 26019233]	1.7e-13	ILMN_1697971	TRIM38	trans	NotFnd	NotFnd	rs115810	1.79e-171	ILMN_1697971	TRIM38	cis
rs6904071	6	27079476	Peripheral blood mononuclear cells [PMID 26019233]	3.09e-13	ILMN_1697971	TRIM38	trans	NotFnd	NotFnd	rs115810	1.79e-171	ILMN_1697971	TRIM38	cis
rs3800307	6	27218012	Peripheral blood mononuclear cells [PMID 26019233]	3.92e-10	ILMN_1697971	TRIM38	trans	NotFnd	NotFnd	rs115810	1.79e-171	ILMN_1697971	TRIM38	cis
rs2893910	6	27315474	Peripheral blood mononuclear cells [PMID 26019233]	4.47e-10	ILMN_1697971	TRIM38	trans	NotFnd	NotFnd	rs115810	1.79e-171	ILMN_1697971	TRIM38	cis
rs3800318	6	27295861	Peripheral blood mononuclear cells [PMID 26019233]	6.41e-10	ILMN_1697971	TRIM38	trans	NotFnd	NotFnd	rs115810	1.79e-171	ILMN_1697971	TRIM38	cis
rs6938200	6	27263370	Peripheral blood mononuclear cells [PMID 26019233]	9.85e-10	ILMN_1697971	TRIM38	trans	NotFnd	NotFnd	rs115810	1.79e-171	ILMN_1697971	TRIM38	cis
rs16897515	6	27310240	Peripheral blood mononuclear cells [PMID 26019233]	1.76e-09	ILMN_1697971	TRIM38	trans	NotFnd	NotFnd	rs115810	1.79e-171	ILMN_1697971	TRIM38	cis
rs13211166	6	27298160	Peripheral blood mononuclear cells [PMID 26019233]	1.83e-09	ILMN_1697971	TRIM38	trans	NotFnd	NotFnd	rs115810	1.79e-171	ILMN_1697971	TRIM38	cis
rs7746199	6	27293544	Peripheral blood mononuclear cells [PMID 26019233]	2.19e-09	ILMN_1697971	TRIM38	trans	NotFnd	NotFnd	rs115810	1.79e-171	ILMN_1697971	TRIM38	cis
rs7636049	3	38931100	Peripheral blood mononuclear cells [PMID 26019233]	5.28e-15	ILMN_1715332	TTC21A	cis	0.715	1	rs4076478	4.17e-20	ILMN_1715332	TTC21A	cis
rs13207082	6	27283599	Peripheral blood mononuclear cells [PMID 26019233]	8.69e-08	ILMN_2101885	TUBB	trans	NotFnd	NotFnd	rs9501029	1.31e-76	ILMN_1703692	TUBB	cis
rs11966040	6	30761709	Peripheral blood mononuclear cells [PMID 26019233]	6.17e-06	ILMN_1703692	TUBB	cis	NotFnd	NotFnd	rs9501029	1.31e-76	ILMN_1703692	TUBB	cis
rs11964596	6	30768763	Peripheral blood mononuclear cells [PMID 26019233]	1.14e-05	ILMN_1703692	TUBB	cis	NotFnd	NotFnd	rs9501029	1.31e-76	ILMN_1703692	TUBB	cis
rs11247921	1	26339110	Peripheral blood mononuclear cells [PMID 26019233]	8.18e-06	ILMN_2376416	UBXN11	cis	0.064	0.535	rs11247915	9.21e-67	ILMN_2376416	UBXN11	cis
rs6928140	6	148619463	LCL in asthmatics (Liang 1kg) [PMID 23345460]	6.89e-24	205139_s_at	UST	cis	0.146	0.731	rs34164466	8.24e-41	205139_s_at	UST	cis
rs12194090	6	148603480	LCL in asthmatics (Liang 1kg) [PMID 23345460]	1.25e-22	205139_s_at	UST	cis	0.159	0.734	rs34164466	8.24e-41	205139_s_at	UST	cis
rs9390589	6	148623190	LCL in asthmatics (Liang 1kg) [PMID 23345460]	1.38e-21	205139_s_at	UST	cis	0.18	0.86	rs34164466	8.24e-41	205139_s_at	UST	cis
rs3885665	6	148649777	LCL in asthmatics (Liang 1kg) [PMID 23345460]	6.68e-20	205139_s_at	UST	cis	0.188	0.863	rs34164466	8.24e-41	205139_s_at	UST	cis
rs4897035	6	148682274	LCL in asthmatics (Liang 1kg) [PMID 23345460]	2.21e-19	205139_s_at	UST	cis	0.159	0.856	rs34164466	8.24e-41	205139_s_at	UST	cis
rs6570881	6	148675308	LCL in asthmatics (Liang 1kg) [PMID 23345460]	2.59e-19	205139_s_at	UST	cis	0.188	0.863	rs34164466	8.24e-41	205139_s_at	UST	cis
rs9498113	6	148678317	LCL in asthmatics (Liang 1kg) [PMID 23345460]	2.91e-19	205139_s_at	UST	cis	0.18	0.86	rs34164466	8.24e-41	205139_s_at	UST	cis
rs9403969	6	148622037	LCL (MuTHER) [PMID 22941192]	1.49e-10	ILMN_1700024	UST	cis	0.046	0.354	rs10499260	2.25e-15	ILMN_1700024	UST	cis
rs4897035	6	148682274	LCL (MuTHER) [PMID 22941192]	9.22e-10	ILMN_1700024	UST	cis	0.054	0.426	rs10499260	2.25e-15	ILMN_1700024	UST	cis
rs12194090	6	148603480	LCL (MuTHER) [PMID 22941192]	9.28e-10	ILMN_1700024	UST	cis	0.051	0.357	rs10499260	2.25e-15	ILMN_1700024	UST	cis
rs6928140	6	148619463	LCL (MuTHER) [PMID 22941192]	1.08e-09	ILMN_1700024	UST	cis	0.046	0.354	rs10499260	2.25e-15	ILMN_1700024	UST	cis
rs9689369	6	148608522	LCL (MuTHER) [PMID 22941192]	1.17e-09	ILMN_1700024	UST	cis	0.051	0.357	rs10499260	2.25e-15	ILMN_1700024	UST	cis
rs9498113	6	148678317	LCL (MuTHER) [PMID 22941192]	1.37e-09	ILMN_1700024	UST	cis	0.064	0.44	rs10499260	2.25e-15	ILMN_1700024	UST	cis
rs6570881	6	148675308	LCL (MuTHER) [PMID 22941192]	1.51e-09	ILMN_1700024	UST	cis	0.071	0.454	rs10499260	2.25e-15	ILMN_1700024	UST	cis
rs3885665	6	148649777	LCL (MuTHER) [PMID 22941192]	1.59e-09	ILMN_1700024	UST	cis	0.071	0.454	rs10499260	2.25e-15	ILMN_1700024	UST	cis
rs9390589	6	148623190	LCL (MuTHER) [PMID 22941192]	7.38e-09	ILMN_1700024	UST	cis	0.064	0.44	rs10499260	2.25e-15	ILMN_1700024	UST	cis
rs6928140	6	148619463	LCL [PMID 17873877]	1.1e-07	205138_s_at	UST	cis	0.046	0.354	rs10499260	6.4e-16	205138_s_at	UST	cis
rs13207082	6	27283599	Peripheral blood mononuclear cells [PMID 26019233]	8.86e-26	ILMN_1737585	VARS2	trans	NotFnd	NotFnd	rs2249464	0	ILMN_1737585	VARS2	cis
rs16897515	6	27310240	Peripheral blood mononuclear cells [PMID 26019233]	6.32e-16	ILMN_1737585	VARS2	trans	NotFnd	NotFnd	rs2249464	0	ILMN_1737585	VARS2	cis
rs7746199	6	27293544	Peripheral blood mononuclear cells [PMID 26019233]	2.43e-15	ILMN_1737585	VARS2	trans	NotFnd	NotFnd	rs2249464	0	ILMN_1737585	VARS2	cis
rs3800318	6	27295861	Peripheral blood mononuclear cells [PMID 26019233]	5.53e-15	ILMN_1737585	VARS2	trans	NotFnd	NotFnd	rs2249464	0	ILMN_1737585	VARS2	cis
rs2893910	6	27315474	Peripheral blood mononuclear cells [PMID 26019233]	1.06e-14	ILMN_1737585	VARS2	trans	NotFnd	NotFnd	rs2249464	0	ILMN_1737585	VARS2	cis
rs1892250	6	25768795	Peripheral blood mononuclear cells [PMID 26019233]	2.93e-13	ILMN_1737585	VARS2	trans	NotFnd	NotFnd	rs2249464	0	ILMN_1737585	VARS2	cis
rs6902211	6	25767208	Peripheral blood mononuclear cells [PMID 26019233]	3.45e-13	ILMN_1737585	VARS2	trans	NotFnd	NotFnd	rs2249464	0	ILMN_1737585	VARS2	cis
rs4712969	6	25763963	Peripheral blood mononuclear cells [PMID 26019233]	3.47e-13	ILMN_1737585	VARS2	trans	NotFnd	NotFnd	rs2249464	0	ILMN_1737585	VARS2	cis
rs4236040	6	25760980	Peripheral blood mononuclear cells [PMID 26019233]	3.52e-13	ILMN_1737585	VARS2	trans	NotFnd	NotFnd	rs2249464	0	ILMN_1737585	VARS2	cis
rs13211166	6	27298160	Peripheral blood mononuclear cells [PMID 26019233]	5.58e-13	ILMN_1737585	VARS2	trans	NotFnd	NotFnd	rs2249464	0	ILMN_1737585	VARS2	cis
rs972087	6	25872350	Peripheral blood mononuclear cells [PMID 26019233]	4.93e-10	ILMN_1737585	VARS2	trans	NotFnd	NotFnd	rs2249464	0	ILMN_1737585	VARS2	cis
rs13194053	6	27176103	Peripheral blood mononuclear cells [PMID 26019233]	2.26e-09	ILMN_1737585	VARS2	trans	NotFnd	NotFnd	rs2249464	0	ILMN_1737585	VARS2	cis
rs13219181	6	27168445	Peripheral blood mononuclear cells [PMID 26019233]	2.44e-09	ILMN_1737585	VARS2	trans	NotFnd	NotFnd	rs2249464	0	ILMN_1737585	VARS2	cis
rs6913660	6	27123645	Peripheral blood mononuclear cells [PMID 26019233]	2.72e-09	ILMN_1737585	VARS2	trans	NotFnd	NotFnd	rs2249464	0	ILMN_1737585	VARS2	cis
rs926300	6	27091663	Peripheral blood mononuclear cells [PMID 26019233]	2.85e-09	ILMN_1737585	VARS2	trans	NotFnd	NotFnd	rs2249464	0	ILMN_1737585	VARS2	cis
rs6904071	6	27079476	Peripheral blood mononuclear cells [PMID 26019233]	2.93e-09	ILMN_1737585	VARS2	trans	NotFnd	NotFnd	rs2249464	0	ILMN_1737585	VARS2	cis
rs7636049	3	38931100	Whole blood (CHARGE) [PMID 24013639]	1.2e-119	2650110	WDR48	cis	0.216	0.593	rs3736573	9.81e-198	2650110	WDR48	cis
rs7636049	3	38931100	Peripheral blood mononuclear cells [PMID 26019233]	1.57e-27	ILMN_1762103	WDR48	cis	0.216	0.593	rs1053516	1.71e-231	ILMN_1762103	WDR48	cis
rs7636049	3	38931100	Monocytes [PMID 20502693]	9.18e-12		WDR48	cis	0.216	0.593	rs1053530	3.53e-102		WDR48	cis
rs7636049	3	38931100	Subc adipose (MuTHER) [PMID 22941192]	1.17e-10	ILMN_1762103	WDR48	cis	0.216	0.593	rs3736573	3.28e-60	ILMN_1762103	WDR48	cis
rs7636049	3	38931100	Whole blood (PAX) in breast cancer survivors [PMID 23880221]	3.33e-10	6020255	WDR48	cis	0.374	0.749	rs4676588	3.19e-49	6020255	WDR48	cis
rs7636049	3	38931100	LCL (MuTHER) [PMID 22941192]	3.26e-06	ILMN_1762103	WDR48	cis	0.216	0.593	rs2056613	1.88e-38	ILMN_1762103	WDR48	cis
rs7636049	3	38931100	Skin (MuTHER) [PMID 22941192]	9.84e-06	ILMN_1762103	WDR48	cis	0.216	0.593	rs1053530	5.97e-52	ILMN_1762103	WDR48	cis
rs7636049	3	38931100	Aortic endothelial cells (controls, unstimulated)	0.000111		WDR48	cis	0.216	0.593	rs1053530	3.95e-13		WDR48	cis
rs3821301	2	159231023	Peripheral blood mononuclear cells [PMID 26019233]	2.99e-33	ILMN_1735275	WDSUB1	cis	0.021	1	rs6761921	3.69e-53	ILMN_1735275	WDSUB1	cis
rs2042494	2	159227712	Peripheral blood mononuclear cells [PMID 26019233]	3.22e-33	ILMN_1735275	WDSUB1	cis	0.021	1	rs6761921	3.69e-53	ILMN_1735275	WDSUB1	cis
rs2288111	2	159228022	Peripheral blood mononuclear cells [PMID 26019233]	3.22e-33	ILMN_1735275	WDSUB1	cis	0.021	1	rs6761921	3.69e-53	ILMN_1735275	WDSUB1	cis
rs2042495	2	159227751	Peripheral blood mononuclear cells [PMID 26019233]	1.39e-32	ILMN_1735275	WDSUB1	cis	0.021	1	rs6761921	3.69e-53	ILMN_1735275	WDSUB1	cis
rs13022357	2	159213244	Peripheral blood mononuclear cells [PMID 26019233]	6.62e-30	ILMN_1735275	WDSUB1	cis	0.021	1	rs6761921	3.69e-53	ILMN_1735275	WDSUB1	cis
rs2042495	2	159227751	Whole blood (CHARGE) [PMID 24013639]	2e-26	2650538	WDSUB1	cis	0.021	1	rs10490002	1.3e-79	2650538	WDSUB1	cis
rs2042494	2	159227712	Whole blood (CHARGE) [PMID 24013639]	2.6e-26	2650538	WDSUB1	cis	0.021	1	rs10490002	1.3e-79	2650538	WDSUB1	cis
rs2288111	2	159228022	Whole blood (CHARGE) [PMID 24013639]	2.6e-26	2650538	WDSUB1	cis	0.021	1	rs10490002	1.3e-79	2650538	WDSUB1	cis
rs3821301	2	159231023	Whole blood (CHARGE) [PMID 24013639]	3.94e-26	2650538	WDSUB1	cis	0.021	1	rs10490002	1.3e-79	2650538	WDSUB1	cis
rs13022357	2	159213244	Whole blood (CHARGE) [PMID 24013639]	4.5e-23	2650538	WDSUB1	cis	0.021	1	rs10490002	1.3e-79	2650538	WDSUB1	cis
rs2042495	2	159227751	Visual cortex (all samples) [PMID 23622250]	7.69e-15	10025904849	WDSUB1	cis	SameSNP	SameSNP	rs2042495	7.69e-15	10025904849	WDSUB1	cis
rs2042495	2	159227751	LCL (MuTHER) [PMID 22941192]	1.17e-08	ILMN_1735275	WDSUB1	cis	1	1	rs3821301	1.17e-08	ILMN_1735275	WDSUB1	cis
rs3821301	2	159231023	LCL (MuTHER) [PMID 22941192]	1.17e-08	ILMN_1735275	WDSUB1	cis	SameSNP	SameSNP	rs3821301	1.17e-08	ILMN_1735275	WDSUB1	cis
rs2288111	2	159228022	LCL (MuTHER) [PMID 22941192]	1.27e-08	ILMN_1735275	WDSUB1	cis	1	1	rs3821301	1.17e-08	ILMN_1735275	WDSUB1	cis
rs2042494	2	159227712	LCL (MuTHER) [PMID 22941192]	1.34e-08	ILMN_1735275	WDSUB1	cis	1	1	rs3821301	1.17e-08	ILMN_1735275	WDSUB1	cis
rs3821301	2	159231023	Cerebellum (all samples) [PMID 23622250]	2.27e-08	10025904849	WDSUB1	cis	0.536	1	rs13026048	3.22e-09	10025904849	WDSUB1	cis
rs3821301	2	159231023	Prefrontal cortex (all samples) [PMID 23622250]	2.38e-08	10025904849	WDSUB1	cis	0.023	1	rs2159876	2.65e-14	10025904849	WDSUB1	cis
rs3821301	2	159231023	Visual cortex (all samples) [PMID 23622250]	2.71e-08	10025904849	WDSUB1	cis	1	1	rs2042495	7.69e-15	10025904849	WDSUB1	cis
rs13022357	2	159213244	Cerebellum (ScanDB) [PMID 22212596]	3.91e-08		WDSUB1	cis	0.536	1	rs13026048	2.5e-11		WDSUB1	cis
rs3821301	2	159231023	Cerebellum (ScanDB) [PMID 22212596]	7.26e-08		WDSUB1	cis	0.536	1	rs13026048	2.5e-11		WDSUB1	cis
rs2288111	2	159228022	Cerebellum (ScanDB) [PMID 22212596]	7.48e-08		WDSUB1	cis	0.536	1	rs13026048	2.5e-11		WDSUB1	cis
rs2042495	2	159227751	Cerebellum (ScanDB) [PMID 22212596]	7.56e-08		WDSUB1	cis	0.536	1	rs13026048	2.5e-11		WDSUB1	cis
rs2042494	2	159227712	Cerebellum (ScanDB) [PMID 22212596]	7.98e-08		WDSUB1	cis	0.536	1	rs13026048	2.5e-11		WDSUB1	cis
rs13022357	2	159213244	LCL (MuTHER) [PMID 22941192]	1.33e-07	ILMN_1735275	WDSUB1	cis	1	1	rs3821301	1.17e-08	ILMN_1735275	WDSUB1	cis
rs2288111	2	159228022	Average in 10 brain regions [PMID 25174004]	1.21e-06	t2582979	WDSUB1	cis	NotFnd	NotFnd	rs6746645	5.64e-09	t2582979	WDSUB1	cis
rs2042495	2	159227751	CD14+ monocytes (untreated) [PMID 24604202]	1.52e-06	2650538	WDSUB1	cis	0.59	1	rs4665040	8.42e-13	2650538	WDSUB1	cis
rs3821301	2	159231023	CD14+ monocytes (untreated) [PMID 24604202]	1.52e-06	2650538	WDSUB1	cis	0.59	1	rs4665040	8.42e-13	2650538	WDSUB1	cis
rs3821301	2	159231023	Prefrontal cortex (Alzheimer's) [PMID 23622250]	2.58e-06	10025904849	WDSUB1	cis	0.536	1	rs13026048	2.37e-09	10025904849	WDSUB1	cis
rs3821301	2	159231023	Lymph [PMID 17873875]	7.76e-06	GI_22749102-S	WDSUB1	cis	0.536	1	rs13026048	3.74e-07	GI_22749102-S	WDSUB1	cis
rs2042495	2	159227751	Lymph [PMID 17873875]	9.04e-06	GI_22749102-S	WDSUB1	cis	0.536	1	rs13026048	3.74e-07	GI_22749102-S	WDSUB1	cis
rs2042495	2	159227751	CD14+ monocytes (24h LPS stimulated) [PMID 24604202]	1.98e-05	2650538	WDSUB1	cis	0.029	0.384	rs10181248	2.24e-17	2650538	WDSUB1	cis
rs3821301	2	159231023	CD14+ monocytes (24h LPS stimulated) [PMID 24604202]	1.98e-05	2650538	WDSUB1	cis	0.029	0.384	rs10181248	2.24e-17	2650538	WDSUB1	cis
rs9403969	6	148622037	SubCutAdipose(Greenawalt) [PMID 21602305]	4.16e-05	10025934859	XM_210654	cis	SameSNP	SameSNP	rs9403969	4.16e-05	10025934859	XM_210654	cis
rs663428	1	37741124	CD14+ monocytes (2h LPS stimulated) [PMID 24604202]	0.000303	3440224	YRDC	cis	0.046	0.722	rs12751325	1.34e-38	3440224	YRDC	cis
rs16897515	6	27310240	Peripheral blood mononuclear cells [PMID 26019233]	3.99e-11	ILMN_1750967	ZKSCAN3	trans	NotFnd	NotFnd	rs13201753	2.25e-38	ILMN_1750967	ZKSCAN3	cis
rs2893910	6	27315474	Peripheral blood mononuclear cells [PMID 26019233]	1.27e-10	ILMN_1750967	ZKSCAN3	trans	NotFnd	NotFnd	rs13201753	2.25e-38	ILMN_1750967	ZKSCAN3	cis
rs7746199	6	27293544	Peripheral blood mononuclear cells [PMID 26019233]	1.38e-10	ILMN_1750967	ZKSCAN3	trans	NotFnd	NotFnd	rs13201753	2.25e-38	ILMN_1750967	ZKSCAN3	cis
rs3800318	6	27295861	Peripheral blood mononuclear cells [PMID 26019233]	1.41e-10	ILMN_1750967	ZKSCAN3	trans	NotFnd	NotFnd	rs13201753	2.25e-38	ILMN_1750967	ZKSCAN3	cis
rs13211166	6	27298160	Peripheral blood mononuclear cells [PMID 26019233]	4.78e-10	ILMN_1750967	ZKSCAN3	trans	NotFnd	NotFnd	rs13201753	2.25e-38	ILMN_1750967	ZKSCAN3	cis
rs13207082	6	27283599	Peripheral blood mononuclear cells [PMID 26019233]	1.57e-09	ILMN_1750967	ZKSCAN3	trans	NotFnd	NotFnd	rs13201753	2.25e-38	ILMN_1750967	ZKSCAN3	cis
rs6904071	6	27079476	Peripheral blood mononuclear cells [PMID 26019233]	2.37e-09	ILMN_1750967	ZKSCAN3	trans	NotFnd	NotFnd	rs13201753	2.25e-38	ILMN_1750967	ZKSCAN3	cis
rs6913660	6	27123645	Peripheral blood mononuclear cells [PMID 26019233]	2.47e-09	ILMN_1750967	ZKSCAN3	trans	NotFnd	NotFnd	rs13201753	2.25e-38	ILMN_1750967	ZKSCAN3	cis
rs926300	6	27091663	Peripheral blood mononuclear cells [PMID 26019233]	2.49e-09	ILMN_1750967	ZKSCAN3	trans	NotFnd	NotFnd	rs13201753	2.25e-38	ILMN_1750967	ZKSCAN3	cis
rs13219181	6	27168445	Peripheral blood mononuclear cells [PMID 26019233]	2.85e-09	ILMN_1750967	ZKSCAN3	trans	NotFnd	NotFnd	rs13201753	2.25e-38	ILMN_1750967	ZKSCAN3	cis
rs13194053	6	27176103	Peripheral blood mononuclear cells [PMID 26019233]	4.99e-09	ILMN_1750967	ZKSCAN3	trans	NotFnd	NotFnd	rs13201753	2.25e-38	ILMN_1750967	ZKSCAN3	cis
rs13207082	6	27283599	Peripheral blood mononuclear cells [PMID 26019233]	1.35e-05	ILMN_1804571	ZKSCAN4	cis	NotFnd	NotFnd	rs9295768	3.26e-07	ILMN_1804571	ZKSCAN4	cis
rs13207082	6	27283599	CD14+ monocytes (24h LPS stimulated) [PMID 24604202]	3.35e-05	3390053	ZKSCAN4	cis	SameSNP	SameSNP	rs13207082	3.35e-05	3390053	ZKSCAN4	cis
rs6938200	6	27263370	Peripheral blood mononuclear cells [PMID 26019233]	0.000205	ILMN_1804571	ZKSCAN4	cis	NotFnd	NotFnd	rs9295768	3.26e-07	ILMN_1804571	ZKSCAN4	cis
rs7763390	6	28746983	Peripheral blood mononuclear cells [PMID 26019233]	0.000345	ILMN_1804571	ZKSCAN4	cis	NotFnd	NotFnd	rs9295768	3.26e-07	ILMN_1804571	ZKSCAN4	cis
rs13207082	6	27283599	CD14+ monocytes (untreated) [PMID 24604202]	0.000766	3390053	ZKSCAN4	cis	0.231	1	rs2076305	4.81e-05	3390053	ZKSCAN4	cis
rs16897515	6	27310240	Peripheral blood mononuclear cells [PMID 26019233]	0.00252	ILMN_1804571	ZKSCAN4	cis	NotFnd	NotFnd	rs9295768	3.26e-07	ILMN_1804571	ZKSCAN4	cis
rs13207082	6	27283599	Peripheral blood mononuclear cells [PMID 26019233]	3.43e-10	ILMN_1760982	ZNF187	cis	NotFnd	NotFnd	rs1531681	4.23e-63	ILMN_1760982	ZNF187	cis
rs4236040	6	25760980	Peripheral blood mononuclear cells [PMID 26019233]	2.44e-08	ILMN_1760982	ZNF187	trans	NotFnd	NotFnd	rs1531681	4.23e-63	ILMN_1760982	ZNF187	cis
rs4712969	6	25763963	Peripheral blood mononuclear cells [PMID 26019233]	2.45e-08	ILMN_1760982	ZNF187	trans	NotFnd	NotFnd	rs1531681	4.23e-63	ILMN_1760982	ZNF187	cis
rs6902211	6	25767208	Peripheral blood mononuclear cells [PMID 26019233]	2.49e-08	ILMN_1760982	ZNF187	trans	NotFnd	NotFnd	rs1531681	4.23e-63	ILMN_1760982	ZNF187	cis
rs1892250	6	25768795	Peripheral blood mononuclear cells [PMID 26019233]	3.55e-08	ILMN_1760982	ZNF187	trans	NotFnd	NotFnd	rs1531681	4.23e-63	ILMN_1760982	ZNF187	cis
rs7746199	6	27293544	Peripheral blood mononuclear cells [PMID 26019233]	3.29e-06	ILMN_1760982	ZNF187	cis	NotFnd	NotFnd	rs1531681	4.23e-63	ILMN_1760982	ZNF187	cis
rs3800318	6	27295861	Peripheral blood mononuclear cells [PMID 26019233]	4.62e-06	ILMN_1760982	ZNF187	cis	NotFnd	NotFnd	rs1531681	4.23e-63	ILMN_1760982	ZNF187	cis
rs7763390	6	28746983	Peripheral blood mononuclear cells [PMID 26019233]	4.83e-06	ILMN_1760982	ZNF187	cis	NotFnd	NotFnd	rs1531681	4.23e-63	ILMN_1760982	ZNF187	cis
rs2893910	6	27315474	Peripheral blood mononuclear cells [PMID 26019233]	7.26e-06	ILMN_1760982	ZNF187	cis	NotFnd	NotFnd	rs1531681	4.23e-63	ILMN_1760982	ZNF187	cis
rs13211166	6	27298160	Peripheral blood mononuclear cells [PMID 26019233]	2.55e-05	ILMN_1760982	ZNF187	cis	NotFnd	NotFnd	rs1531681	4.23e-63	ILMN_1760982	ZNF187	cis
rs16897515	6	27310240	Peripheral blood mononuclear cells [PMID 26019233]	4.76e-05	ILMN_1760982	ZNF187	cis	NotFnd	NotFnd	rs1531681	4.23e-63	ILMN_1760982	ZNF187	cis
rs7763390	6	28746983	Peripheral blood mononuclear cells [PMID 26019233]	0.000117	ILMN_1714510	ZNF192P1	cis	NotFnd	NotFnd	rs2116984	3.07e-16	ILMN_1714510	ZNF192P1	cis
rs7763390	6	28746983	Peripheral blood mononuclear cells [PMID 26019233]	3.06e-14	ILMN_1669516	ZNF193	cis	NotFnd	NotFnd	rs10456357	1.85e-86	ILMN_1669516	ZNF193	cis
rs7746199	6	27293544	Peripheral blood mononuclear cells [PMID 26019233]	1.94e-10	ILMN_1669516	ZNF193	cis	NotFnd	NotFnd	rs10456357	1.85e-86	ILMN_1669516	ZNF193	cis
rs3800318	6	27295861	Peripheral blood mononuclear cells [PMID 26019233]	3.37e-10	ILMN_1669516	ZNF193	cis	NotFnd	NotFnd	rs10456357	1.85e-86	ILMN_1669516	ZNF193	cis
rs2893910	6	27315474	Peripheral blood mononuclear cells [PMID 26019233]	6.38e-10	ILMN_1669516	ZNF193	cis	NotFnd	NotFnd	rs10456357	1.85e-86	ILMN_1669516	ZNF193	cis
rs13211166	6	27298160	Peripheral blood mononuclear cells [PMID 26019233]	8.23e-10	ILMN_1669516	ZNF193	cis	NotFnd	NotFnd	rs10456357	1.85e-86	ILMN_1669516	ZNF193	cis
rs16897515	6	27310240	Peripheral blood mononuclear cells [PMID 26019233]	5.21e-09	ILMN_1669516	ZNF193	cis	NotFnd	NotFnd	rs10456357	1.85e-86	ILMN_1669516	ZNF193	cis
rs13207082	6	27283599	Peripheral blood mononuclear cells [PMID 26019233]	5.83e-07	ILMN_1669516	ZNF193	cis	NotFnd	NotFnd	rs10456357	1.85e-86	ILMN_1669516	ZNF193	cis
rs6938200	6	27263370	Peripheral blood mononuclear cells [PMID 26019233]	0.000359	ILMN_1669516	ZNF193	cis	NotFnd	NotFnd	rs10456357	1.85e-86	ILMN_1669516	ZNF193	cis
rs3800307	6	27218012	Peripheral blood mononuclear cells [PMID 26019233]	1.11e-13	ILMN_2224290	ZNF322	cis	NotFnd	NotFnd	rs2504540	4.83e-139	ILMN_2224290	ZNF322	cis
rs13194053	6	27176103	Peripheral blood mononuclear cells [PMID 26019233]	4.24e-13	ILMN_2224290	ZNF322	cis	NotFnd	NotFnd	rs2504540	4.83e-139	ILMN_2224290	ZNF322	cis
rs13219181	6	27168445	Peripheral blood mononuclear cells [PMID 26019233]	7.73e-13	ILMN_2224290	ZNF322	cis	0.068	0.757	rs2504540	4.83e-139	ILMN_2224290	ZNF322	cis
rs926300	6	27091663	Peripheral blood mononuclear cells [PMID 26019233]	8.49e-13	ILMN_2224290	ZNF322	cis	0.068	0.757	rs2504540	4.83e-139	ILMN_2224290	ZNF322	cis
rs6913660	6	27123645	Peripheral blood mononuclear cells [PMID 26019233]	8.6e-13	ILMN_2224290	ZNF322	cis	0.068	0.757	rs2504540	4.83e-139	ILMN_2224290	ZNF322	cis
rs6904071	6	27079476	Peripheral blood mononuclear cells [PMID 26019233]	1.67e-12	ILMN_2224290	ZNF322	cis	0.068	0.757	rs2504540	4.83e-139	ILMN_2224290	ZNF322	cis
rs6938200	6	27263370	Peripheral blood mononuclear cells [PMID 26019233]	1.1e-09	ILMN_2224290	ZNF322	cis	NotFnd	NotFnd	rs2504540	4.83e-139	ILMN_2224290	ZNF322	cis
rs7746199	6	27293544	Peripheral blood mononuclear cells [PMID 26019233]	5.17e-07	ILMN_2224290	ZNF322	cis	NotFnd	NotFnd	rs2504540	4.83e-139	ILMN_2224290	ZNF322	cis
rs13207082	6	27283599	Peripheral blood mononuclear cells [PMID 26019233]	5.69e-07	ILMN_2224290	ZNF322	cis	NotFnd	NotFnd	rs2504540	4.83e-139	ILMN_2224290	ZNF322	cis
rs16897515	6	27310240	Peripheral blood mononuclear cells [PMID 26019233]	1.23e-06	ILMN_2224290	ZNF322	cis	NotFnd	NotFnd	rs2504540	4.83e-139	ILMN_2224290	ZNF322	cis
rs2893910	6	27315474	Peripheral blood mononuclear cells [PMID 26019233]	1.59e-06	ILMN_2224290	ZNF322	cis	NotFnd	NotFnd	rs2504540	4.83e-139	ILMN_2224290	ZNF322	cis
rs3800318	6	27295861	Peripheral blood mononuclear cells [PMID 26019233]	1.61e-06	ILMN_2224290	ZNF322	cis	NotFnd	NotFnd	rs2504540	4.83e-139	ILMN_2224290	ZNF322	cis
rs13211166	6	27298160	Peripheral blood mononuclear cells [PMID 26019233]	3.68e-06	ILMN_2224290	ZNF322	cis	NotFnd	NotFnd	rs2504540	4.83e-139	ILMN_2224290	ZNF322	cis
rs4236040	6	25760980	Peripheral blood mononuclear cells [PMID 26019233]	0.000645	ILMN_2224290	ZNF322	cis	NotFnd	NotFnd	rs2504540	4.83e-139	ILMN_2224290	ZNF322	cis
rs4712969	6	25763963	Peripheral blood mononuclear cells [PMID 26019233]	0.000649	ILMN_2224290	ZNF322	cis	NotFnd	NotFnd	rs2504540	4.83e-139	ILMN_2224290	ZNF322	cis
rs6902211	6	25767208	Peripheral blood mononuclear cells [PMID 26019233]	0.000655	ILMN_2224290	ZNF322	cis	NotFnd	NotFnd	rs2504540	4.83e-139	ILMN_2224290	ZNF322	cis
rs972087	6	25872350	Peripheral blood mononuclear cells [PMID 26019233]	0.000699	ILMN_2224290	ZNF322	cis	NotFnd	NotFnd	rs2504540	4.83e-139	ILMN_2224290	ZNF322	cis
rs1892250	6	25768795	Peripheral blood mononuclear cells [PMID 26019233]	0.000786	ILMN_2224290	ZNF322	cis	NotFnd	NotFnd	rs2504540	4.83e-139	ILMN_2224290	ZNF322	cis
rs2893910	6	27315474	Intralobular white matter [PMID 25174004]	1.95e-08	2900349	ZNF389	cis	NotFnd	NotFnd	rs1150686	3.06e-14	2900349	ZNF389	cis
rs2893910	6	27315474	Average in 10 brain regions [PMID 25174004]	3.47e-08	2900349	ZNF389	cis	NotFnd	NotFnd	rs1150686	3.6e-22	2900349	ZNF389	cis
rs16897515	6	27310240	Cerebellar cortex [PMID 25174004]	3.57e-06	t2900340	ZNF389	cis	NotFnd	NotFnd	rs1150686	2.77e-12	2900349	ZNF389	cis
rs12562454	1	26344592	Peripheral blood mononuclear cells [PMID 26019233]	2.24e-23	ILMN_1703441	ZNF593	cis	NotFnd	NotFnd	rs8768	2.87e-173	ILMN_1703441	ZNF593	cis
rs11247921	1	26339110	Peripheral blood mononuclear cells [PMID 26019233]	6.92e-21	ILMN_1703441	ZNF593	cis	NotFnd	NotFnd	rs8768	2.87e-173	ILMN_1703441	ZNF593	cis
rs12562454	1	26344592	Skin (MuTHER) [PMID 22941192]	5.11e-09	ILMN_1703441	ZNF593	cis	0.281	0.646	rs12145714	6.8e-26	ILMN_1703441	ZNF593	cis
rs11247921	1	26339110	Skin (MuTHER) [PMID 22941192]	6.9e-08	ILMN_1703441	ZNF593	cis	0.281	0.646	rs12145714	6.8e-26	ILMN_1703441	ZNF593	cis
rs11247921	1	26339110	Subc adipose (MuTHER) [PMID 22941192]	1.11e-07	ILMN_1703441	ZNF593	cis	0.025	0.459	rs12732022	2.17e-20	ILMN_1703441	ZNF593	cis
rs12562454	1	26344592	Subc adipose (MuTHER) [PMID 22941192]	9.28e-07	ILMN_1703441	ZNF593	cis	0.025	0.459	rs12732022	2.17e-20	ILMN_1703441	ZNF593	cis
rs13207082	6	27283599	Peripheral blood mononuclear cells [PMID 26019233]	1.02e-19	ILMN_1692486	ZNRD1	trans	NotFnd	NotFnd	rs9258434	1.65e-42	ILMN_1722894	ZNRD1	cis
rs7746199	6	27293544	Peripheral blood mononuclear cells [PMID 26019233]	1.44e-15	ILMN_1692486	ZNRD1	trans	NotFnd	NotFnd	rs9258434	1.65e-42	ILMN_1722894	ZNRD1	cis
rs16897515	6	27310240	Peripheral blood mononuclear cells [PMID 26019233]	2.01e-15	ILMN_1692486	ZNRD1	trans	NotFnd	NotFnd	rs9258434	1.65e-42	ILMN_1722894	ZNRD1	cis
rs3800318	6	27295861	Peripheral blood mononuclear cells [PMID 26019233]	3.3e-15	ILMN_1692486	ZNRD1	trans	NotFnd	NotFnd	rs9258434	1.65e-42	ILMN_1722894	ZNRD1	cis
rs2893910	6	27315474	Peripheral blood mononuclear cells [PMID 26019233]	3.56e-15	ILMN_1692486	ZNRD1	trans	NotFnd	NotFnd	rs9258434	1.65e-42	ILMN_1722894	ZNRD1	cis
rs13211166	6	27298160	Peripheral blood mononuclear cells [PMID 26019233]	6.82e-14	ILMN_1692486	ZNRD1	trans	NotFnd	NotFnd	rs9258434	1.65e-42	ILMN_1722894	ZNRD1	cis
rs6904071	6	27079476	Peripheral blood mononuclear cells [PMID 26019233]	3.4e-12	ILMN_1692486	ZNRD1	trans	NotFnd	NotFnd	rs9258434	1.65e-42	ILMN_1722894	ZNRD1	cis
rs13194053	6	27176103	Peripheral blood mononuclear cells [PMID 26019233]	4.68e-12	ILMN_1692486	ZNRD1	trans	NotFnd	NotFnd	rs9258434	1.65e-42	ILMN_1722894	ZNRD1	cis
rs13219181	6	27168445	Peripheral blood mononuclear cells [PMID 26019233]	7.1e-12	ILMN_1692486	ZNRD1	trans	NotFnd	NotFnd	rs9258434	1.65e-42	ILMN_1722894	ZNRD1	cis
rs6913660	6	27123645	Peripheral blood mononuclear cells [PMID 26019233]	7.61e-12	ILMN_1692486	ZNRD1	trans	NotFnd	NotFnd	rs9258434	1.65e-42	ILMN_1722894	ZNRD1	cis
rs926300	6	27091663	Peripheral blood mononuclear cells [PMID 26019233]	7.84e-12	ILMN_1692486	ZNRD1	trans	NotFnd	NotFnd	rs9258434	1.65e-42	ILMN_1722894	ZNRD1	cis
rs3800307	6	27218012	Peripheral blood mononuclear cells [PMID 26019233]	1.11e-11	ILMN_1692486	ZNRD1	trans	NotFnd	NotFnd	rs9258434	1.65e-42	ILMN_1722894	ZNRD1	cis
rs6938200	6	27263370	Peripheral blood mononuclear cells [PMID 26019233]	3.67e-11	ILMN_1692486	ZNRD1	trans	NotFnd	NotFnd	rs9258434	1.65e-42	ILMN_1722894	ZNRD1	cis
rs4236040	6	25760980	Peripheral blood mononuclear cells [PMID 26019233]	6.21e-09	ILMN_1692486	ZNRD1	trans	NotFnd	NotFnd	rs9258434	1.65e-42	ILMN_1722894	ZNRD1	cis
rs4712969	6	25763963	Peripheral blood mononuclear cells [PMID 26019233]	6.26e-09	ILMN_1692486	ZNRD1	trans	NotFnd	NotFnd	rs9258434	1.65e-42	ILMN_1722894	ZNRD1	cis
rs6902211	6	25767208	Peripheral blood mononuclear cells [PMID 26019233]	6.33e-09	ILMN_1692486	ZNRD1	trans	NotFnd	NotFnd	rs9258434	1.65e-42	ILMN_1722894	ZNRD1	cis
rs1892250	6	25768795	Peripheral blood mononuclear cells [PMID 26019233]	8.14e-09	ILMN_1692486	ZNRD1	trans	NotFnd	NotFnd	rs9258434	1.65e-42	ILMN_1722894	ZNRD1	cis
rs972087	6	25872350	Peripheral blood mononuclear cells [PMID 26019233]	3.91e-08	ILMN_1692486	ZNRD1	trans	NotFnd	NotFnd	rs9258434	1.65e-42	ILMN_1722894	ZNRD1	cis
rs13207082	6	27283599	Peripheral blood mononuclear cells [PMID 26019233]	4.98e-08	ILMN_2398587	ZNRD1	trans	NotFnd	NotFnd	rs9258434	1.65e-42	ILMN_1722894	ZNRD1	cis
rs13207082	6	27283599	CD14+ monocytes (IFNg stimulated) [PMID 24604202]	1.54e-06	2470296	ZSCAN16	cis	NotFnd	NotFnd	rs6939576	6.91e-11	2470296	ZSCAN16	cis
rs13207082	6	27283599	Peripheral blood mononuclear cells [PMID 26019233]	4.02e-06	ILMN_1809566	ZSCAN16	cis	NotFnd	NotFnd	rs3094064	7.32e-08	ILMN_1809566	ZSCAN16	trans
rs13194053	6	27176103	Peripheral blood mononuclear cells [PMID 26019233]	2.62e-05	ILMN_1809566	ZSCAN16	cis	NotFnd	NotFnd	rs3094064	7.32e-08	ILMN_1809566	ZSCAN16	trans
rs13219181	6	27168445	Peripheral blood mononuclear cells [PMID 26019233]	2.79e-05	ILMN_1809566	ZSCAN16	cis	NotFnd	NotFnd	rs3094064	7.32e-08	ILMN_1809566	ZSCAN16	trans
rs6938200	6	27263370	Peripheral blood mononuclear cells [PMID 26019233]	9.93e-05	ILMN_1809566	ZSCAN16	cis	NotFnd	NotFnd	rs3094064	7.32e-08	ILMN_1809566	ZSCAN16	trans
rs3800307	6	27218012	Peripheral blood mononuclear cells [PMID 26019233]	0.000291	ILMN_1809566	ZSCAN16	cis	NotFnd	NotFnd	rs3094064	7.32e-08	ILMN_1809566	ZSCAN16	trans
rs7746199	6	27293544	CD14+ monocytes (IFNg stimulated) [PMID 24604202]	0.000608	2470296	ZSCAN16	cis	NotFnd	NotFnd	rs6939576	6.91e-11	2470296	ZSCAN16	cis
rs2893910	6	27315474	CD14+ monocytes (IFNg stimulated) [PMID 24604202]	0.00087	2470296	ZSCAN16	cis	NotFnd	NotFnd	rs6939576	6.91e-11	2470296	ZSCAN16	cis
