# Supplementary material for: The complex genetics of gait speed: genome-wide meta-analysis approach
Source: Aging (Albany NY). 2017 Jan 10;9(1):209–46. doi: 10.18632/aging.101151 (PMC5310665; doi:10.18632/aging.101151)
Supplement: Supplementary file 9 [file aging-09-0209-s009.xlsx]

## Sheet: TF analysis
TF analysis
chr	pos_hg38	rsID of TF analysis of SNPs	ref	alt	AFR	AMR	ASN	EUR	GERP_cons	SiPhy_cons	Chromatin_States	Chromatin_States_Imputed	Chromatin_Marks	DNAse	Proteins	Motifs	GENCODE_id	GENCODE_direction	GENCODE_distance	GENCODE_name	gene size (bp)	comments
10	84739984	rs12778325	C	T	0.27	0.35	0.26	0.32	0	0				E119	.	.	ENSG00000238469.1	5	123280	AC091487.1	0	sequencing in progress
10	84744979	rs1577285	C	T	0.33	0.36	0.26	0.32	0	0			E011,H3K4me1_Enh;E011,H3K4me3_Pro;E047,H3K9ac_Pro		.	CEBPB_known4;Evi-1_5;Osf2_2;PEBP;PLZF;TAL1_known2	ENSG00000238469.1	5	118285	AC091487.1	0	sequencing in progress
10	84754645	rs2497995	T	C	0.69	0.65	0.74	0.68	0	0			E004,H3K27ac_Enh;E007,H3K27ac_Enh;E014,H3K27ac_Enh;E011,H3K4me3_Pro;E012,H3K4me1_Enh		.	LXR_1;LXR_2;LXR_3;Roaz_1;VDR_2	ENSG00000238469.1	5	108619	AC091487.1	0	sequencing in progress
10	84763924	rs2484083	A	G	0.77	0.65	0.74	0.68	0	0			E001,H3K4me1_Enh;E007,H3K4me1_Enh;E012,H3K4me1_Enh;E016,H3K4me1_Enh;E018,H3K4me1_Enh;E021,H3K4me1_Enh;E024,H3K4me1_Enh;E063,H3K4me1_Enh;E066,H3K4me1_Enh;E085,H3K4me1_Enh;E101,H3K4me1_Enh;E118,H3K4me1_Enh;E001,H3K4me3_Pro;E011,H3K4me3_Pro;E075,H3K4me3_Pro;E114,H3K4me3_Pro;E008,H3K9ac_Pro;E018,H3K9ac_Pro;E019,H3K9ac_Pro;E020,H3K27ac_Enh;E034,H3K27ac_Enh		.	Obox3	ENSG00000238469.1	5	99340	AC091487.1	0	sequencing in progress
10	84772059	rs2484084	A	G	0.76	0.64	0.74	0.68	0	0			E004,H3K4me3_Pro;E028,H3K4me3_Pro		.	Myc_known5;RFX5_disc3;ZEB1_disc1;ZEB1_known4	ENSG00000238469.1	5	91205	AC091487.1	0	sequencing in progress
10	84790397	rs2991916	G	T	0.7	0.63	0.74	0.68	0	0			E113,H3K4me3_Pro		.	.	ENSG00000238469.1	5	72867	AC091487.1	0	sequencing in progress
10	84790468	rs2991915	A	G	0.7	0.63	0.74	0.68	0	0			E113,H3K4me3_Pro		.	EWSR1-FLI1;GATA_disc3;HDAC2_disc6;Irf_disc5;PRDM1_known1;PU.1_disc2;PU.1_disc3;RXRA_disc4;STAT_disc3;TATA_disc7;UF1H3BETA	ENSG00000238469.1	5	72796	AC091487.1	0	sequencing in progress
10	84790665	rs1931875	G	A	0.7	0.63	0.74	0.68	0	0			E113,H3K4me3_Pro		.	AP-1_disc3;AP-1_known2;AP-1_known3;AP-1_known4;AP-2_disc1;BAF155_disc1;BATF_disc1;BCL_disc2;Bach1;GATA_disc2;GR_disc2;HMGN3_disc1;Irf_disc2;Irx;KAP1_disc1;Mef2_disc3;Myc_disc3;PRDM1_disc2;RXRA_disc3;STAT_disc2;TCF4_disc1;p300_disc1	ENSG00000238469.1	5	72599	AC091487.1	0	sequencing in progress
10	84794301	rs7906672	G	A	0.74	0.63	0.74	0.68	0	0					.	Hlx1;Msx-1_1;Nanog_known1;Pou1f1_1;Pou2f2_known2;Pou3f2_2;Sox_3;TATA_known1;YY1_known6	ENSG00000238469.1	5	68963	AC091487.1	0	sequencing in progress
10	84764710	rs1577269	G	A	0.68	0.58	0.74	0.61	0	0			E012,H3K4me1_Enh;E066,H3K4me1_Enh;E084,H3K4me1_Enh;E085,H3K4me1_Enh;E101,H3K4me1_Enh;E118,H3K4me1_Enh;E020,H3K27ac_Enh;E066,H3K27ac_Enh;E075,H3K4me3_Pro	E086	.	Pou5f1_disc2;ZEB1_known4	ENSG00000238469.1	5	98554	AC091487.1	0	sequencing in progress
4	1157976	rs2127910	C	T	0.01	0.01	0	0.03	0	0			E073,H3K4me3_Pro;E105,H3K4me3_Pro		.	Hoxa13;Nrf-2_2	ENSG00000227189.2	3	4274	AC092535.3	0	sequencing in progress
2	136647989	rs1838754	C	G	0.61	0.68	0.23	0.77	0	0					.	Nrf-2_2;Pbx-1_3;TCF4_disc2;TFE	ENSG00000221762.1	5	2796	AC092786.1	0	sequencing in progress
2	136648354	rs13014281	A	G	0.51	0.69	0.21	0.79	0	0					.	COMP1;ELF1_known1;Egr-1_disc2;Ehf;Elf5;PU.1_disc1;PU.1_known1;PU.1_known2;PU.1_known3;Pax-5_disc4;Pou5f1_known2;SPIB;p300_disc10	ENSG00000221762.1	5	3161	AC092786.1	0	sequencing in progress
2	136649112	rs1446100	G	A	0.51	0.69	0.2	0.79	1	1			E007,H3K4me1_Enh		.	GATA_known1;GATA_known10;GATA_known9;GR_known2;GR_known9	ENSG00000221762.1	5	3919	AC092786.1	0	sequencing in progress
4	69407159	rs1982902	T	C	0.17	0.28	0.37	0.35	1	0					.	BDP1_disc3;TBX5_1;TBX5_3	ENSG00000264696.1	5	72171	AC108078.1	0	sequencing in progress
4	69412518	rs2736449	A	C	0.17	0.28	0.36	0.35	0	0					.	HNF4_disc2;KAP1_disc2	ENSG00000264696.1	5	66812	AC108078.1	0	sequencing in progress
4	186873021	rs13124558	T	C	0.29	0.24	0.37	0.28	0	0			E066,H3K4me3_Pro		.	Hoxa5_1;PPAR_3	ENSG00000252382.1	5	15564	AC108865.1	0	sequencing in progress
1	98448287	rs7530588	G	A	0.23	0.4	0.55	0.27	0	0					.	GATA_disc1;GATA_known10;GATA_known13;HDAC2_disc1;HMGN3_disc2;p53_3	ENSG00000221777.1	3	74787	AL160056.1	0	sequencing in progress
1	98449079	rs957984	T	C	0.21	0.4	0.56	0.27	0	0					.	BAF155_disc2;SIX5_disc1;SIX5_disc3;SIX5_disc4;Smad_1;Znf143_disc2	ENSG00000221777.1	3	75579	AL160056.1	0	sequencing in progress
1	98449851	rs12084220	G	A	0.23	0.41	0.56	0.27	0	0			E002,H3K4me1_Enh;E018,H3K4me1_Enh;E020,H3K4me1_Enh;E020,H3K27ac_Enh		.	GATA_disc2;TCF11::MafG	ENSG00000221777.1	3	76351	AL160056.1	0	sequencing in progress
1	98455065	rs11166017	T	A	0.23	0.41	0.56	0.27	1	1			E009,H3K4me1_Enh;E010,H3K4me1_Enh;E011,H3K9ac_Pro;E047,H3K9ac_Pro		.	NF-kappaB_disc3;Zec	ENSG00000221777.1	3	81565	AL160056.1	0	sequencing in progress
1	98455179	rs10875156	T	C	0.23	0.41	0.56	0.27	1	1			E009,H3K4me1_Enh;E011,H3K9ac_Pro;E047,H3K9ac_Pro		.	Cdx;Hoxb13;Pbx-1_1;SP2_disc1	ENSG00000221777.1	3	81679	AL160056.1	0	sequencing in progress
1	98456185	rs10875157	C	T	0.23	0.41	0.56	0.27	0	0					.	Cart1;HNF6;Obox3;Obox6	ENSG00000221777.1	3	82685	AL160056.1	0	sequencing in progress
1	98456882	rs4000204	G	A	0.23	0.41	0.56	0.27	0	0			E002,H3K4me3_Pro;E009,H3K4me1_Enh;E014,H3K4me1_Enh;E077,H3K4me1_Enh;E110,H3K4me1_Enh;E012,H3K27ac_Enh		.	BCL_disc4;HDAC2_disc3;HEY1_disc1;PU.1_disc2	ENSG00000221777.1	3	83382	AL160056.1	0	sequencing in progress
6	61233070	rs2879965	G	T	0.05	0.15	0.09	0.19	0	0			E083,H3K4me3_Pro		.	Ik-2_3;Irf_known9;NF-AT	ENSG00000221606.1	5	52125	AL356131.1	0	sequencing in progress
18	40319073	rs12961105	G	A	0.02	0.02	0	0.04	1	1			E003,H3K27ac_Enh;E063,H3K4me1_Enh		.	DMRT7;Foxo_3;Foxo_4;Pou2f2_known2;p300_disc2	ENSG00000238333.1	5	153747	U7	63	no protein, small nuclear RNA
18	40322525	rs12968136	G	A	0.01	0.02	0	0.04	0	0					.	Foxo_3;TCF4_known1	ENSG00000238333.1	5	150295	U7	63	no protein, small nuclear RNA
18	40329031	rs10048388	G	A	0.02	0.02	0	0.04	0	0			E012,H3K27ac_Enh;E012,H3K4me1_Enh;E014,H3K4me1_Enh;E020,H3K4me1_Enh		.	AIRE_1;DMRT1;DMRT2;DMRT7;Dlx5;HNF6;Prrx2_1	ENSG00000238333.1	5	143789	U7	63	no protein, small nuclear RNA
18	40341708	rs10163816	C	T	0.05	0.03	0	0.04	0	0			E040,H3K27ac_Enh	E090	.	Foxa_known2	ENSG00000238333.1	5	131112	U7	63	no protein, small nuclear RNA
18	40342051	rs10163903	A	T	0.05	0.03	0	0.04	0	0			E006,H3K9ac_Pro;E040,H3K27ac_Enh		.	Pdx1_1;Pdx1_2;Pou3f3	ENSG00000238333.1	5	130769	U7	63	no protein, small nuclear RNA
18	40347890	rs12963704	T	C	0.05	0.04	0	0.05	0	0					.	GATA_known8;HDAC2_disc6;HMG-IY_2;Ik-2_3;Irf_known9;NF-AT;TAL1_disc2;TCF4_known1	ENSG00000238333.1	5	124930	U7	63	no protein, small nuclear RNA
6	33972886	rs9461937	T	C	0.25	0.3	0.33	0.23	0	0			E106,H3K27ac_Enh		.	Brachyury_1;Pou2f2_known2;Pou3f3;Pou5f1_disc1;Pou5f1_known1	ENSG00000221697.1	3	27085	MIR1275	80	microRNA
6	27079477	rs6904071	G	A	0.15	0.12	0.01	0.15	0	0			E001,H3K9ac_Pro;E003,H3K9ac_Pro;E004,H3K9ac_Pro;E014,H3K9ac_Pro;E015,H3K9ac_Pro;E019,H3K9ac_Pro;E020,H3K9ac_Pro;E023,H3K9ac_Pro;E049,H3K9ac_Pro;E068,H3K9ac_Pro;E069,H3K9ac_Pro;E072,H3K9ac_Pro;E073,H3K9ac_Pro;E074,H3K9ac_Pro;E075,H3K9ac_Pro;E088,H3K9ac_Pro;E114,H3K9ac_Pro;E119,H3K9ac_Pro;E004,H3K4me3_Pro;E008,H3K4me3_Pro;E018,H3K4me3_Pro;E019,H3K4me3_Pro;E024,H3K4me3_Pro;E028,H3K4me3_Pro;E045,H3K4…		.	CTCF_disc1;ERalpha-a_disc1;Pou5f1_disc2	ENSG00000222800.1	3	30312	U2	81	no protein, small nuclear RNA
2	178163224	rs12620314	G	A	0.03	0.36	0.69	0.27	0	0			E001,H3K4me1_Enh;E025,H3K4me1_Enh;E028,H3K4me1_Enh;E052,H3K4me1_Enh;E061,H3K4me1_Enh;E124,H3K4me1_Enh;E061,H3K27ac_Enh;E124,H3K9ac_Pro		.	Cdx2_1;Sox_13;Sox_15;Sox_16;Sox_19;Sox_2;Sox_4;Sox_9;Zfp105	ENSG00000223096.1	3	20572	RNU5E-9P	103	no protein, pseudogene
2	56788412	rs2216408	A	G	0.01	0.05	0.08	0.08	0	0			E048,H3K4me3_Pro		.	Cdx	ENSG00000238690.1	3	227648	snoU13	104	no protein, small nucleolar RNA
4	1118929	rs17164349	T	C	0.01	0.01	0	0.03	1	0			E024,H3K4me3_Pro		.	AIRE_1;SRF_known2;SRF_known4;THAP1_disc1	ENSG00000212458.1	0	0	SNORA48	161	no protein, small nucleolar RNA
6	33517844	rs210181	G	A	0.07	0.04	0	0.03	0	0			E055,H3K27ac_Enh;E075,H3K9ac_Pro;E113,H3K4me3_Pro		.	AIRE_2;ERalpha-a_known2;ERalpha-a_known3;PPAR_1;Pax-4_5	ENSG00000242014.2	5	22849	Metazoa_SRP	281	no protein, misc RNA
6	60640961	rs4415148	G	T	0.99	0.84	0.93	0.81	1	1			E083,H3K4me3_Pro		.	Pou6f1_2;Tgif1_2	ENSG00000231273.1	5	82186	RP11-343D24.2	750	no protein, long intergenic non-preotein coding RNA
6	60649356	rs4236162	A	C	0.99	0.83	0.93	0.8	1	0			E083,H3K4me3_Pro		.	Foxd1_2;Foxf1;Foxf2;Foxj1_2;Foxo_1;Foxo_3;Foxq1;HNF1_4;Hmbox1;Hoxa4;Maf_known3;Pbx3_disc3;Pou1f1_2;SP2_disc2;Sox_14	ENSG00000231273.1	5	73791	RP11-343D24.2	750	no protein, long intergenic non-preotein coding RNA
6	60665122	rs4639340	G	T	0.99	0.84	0.93	0.81	0	0			E077,H3K4me3_Pro;E083,H3K4me3_Pro		.	DMRT3;DMRT4;SETDB1_disc1;STAT_known6	ENSG00000231273.1	5	58025	RP11-343D24.2	750	no protein, long intergenic non-preotein coding RNA
6	60666095	rs4392725	G	A	0.96	0.82	0.92	0.8	0	0			E083,H3K4me3_Pro		.	Foxo_2;HDAC2_disc6;Ik-1_2;Ik-2_1;SRF_known6;Zfp105	ENSG00000231273.1	5	57052	RP11-343D24.2	750	no protein, long intergenic non-preotein coding RNA
6	60673847	rs6459298	G	C	0.99	0.84	0.93	0.81	0	0			E001,H3K4me1_Enh;E014,H3K4me1_Enh;E016,H3K4me1_Enh;E018,H3K4me1_Enh;E020,H3K4me1_Enh;E004,H3K27ac_Enh;E015,H3K27ac_Enh;E016,H3K27ac_Enh;E020,H3K27ac_Enh;E020,H3K4me3_Pro;E067,H3K4me3_Pro		.	HEN1_1	ENSG00000231273.1	5	49300	RP11-343D24.2	750	no protein, long intergenic non-preotein coding RNA
6	60677079	rs6459301	T	G	0.99	0.84	0.93	0.81	0	0			E113,H3K4me3_Pro		.	GR_disc1;Maf_disc2;Nanog_disc3	ENSG00000231273.1	5	46068	RP11-343D24.2	750	no protein, long intergenic non-preotein coding RNA
6	60677522	rs4355613	A	G	0.99	0.84	0.93	0.81	1	0			E113,H3K4me3_Pro		.	HNF4_known3	ENSG00000231273.1	5	45625	RP11-343D24.2	750	no protein, long intergenic non-preotein coding RNA
6	60680067	rs4715852	T	G	0.98	0.84	0.93	0.81	0	0			E080,H3K27ac_Enh;E080,H3K4me1_Enh		.	Arid5b;BRCA1_known1;BRCA1_known2;FAC1;RREB-1_1;SIX5_disc1;Znf143_disc2	ENSG00000231273.1	5	43080	RP11-343D24.2	750	no protein, long intergenic non-preotein coding RNA
6	60684056	rs9396408	C	T	0.99	0.84	0.93	0.81	0	0			E001,H3K4me1_Enh;E014,H3K4me1_Enh		.	BCL_disc5	ENSG00000231273.1	5	39091	RP11-343D24.2	750	no protein, long intergenic non-preotein coding RNA
6	60700013	rs13209368	A	T	0.99	0.85	0.93	0.81	0	0					.	CEBPG;Fox;Foxa_known1;Foxa_known4;Foxf1;Foxi1;Foxj1_1;Foxj2_1;Foxo_1;Foxo_3;HDAC2_disc2;RREB-1_2;p300_disc3	ENSG00000231273.1	5	23134	RP11-343D24.2	750	no protein, long intergenic non-preotein coding RNA
6	60701254	rs6937023	C	T	0.99	0.84	0.93	0.81	0	0			E083,H3K4me3_Pro		.	Irf_known5;SMC3_disc4	ENSG00000231273.1	5	21893	RP11-343D24.2	750	no protein, long intergenic non-preotein coding RNA
6	60702791	rs10949183	C	T	0.98	0.84	0.93	0.81	0	0			E083,H3K4me3_Pro;E088,H3K4me3_Pro;E115,H3K27ac_Enh		.	BCL_disc4;ELF1_known1;HDAC2_disc6;Irf_disc5;PU.1_known2;Pax-5_disc3;STAT_known12;UF1H3BETA;ZNF263_disc1;p300_disc5	ENSG00000231273.1	5	20356	RP11-343D24.2	750	no protein, long intergenic non-preotein coding RNA
6	60705650	rs7765475	G	A	0.99	0.84	0.93	0.81	0	0					.	Foxp1;Mef2_known6;TATA_known5	ENSG00000231273.1	5	17497	RP11-343D24.2	750	no protein, long intergenic non-preotein coding RNA
6	60714266	rs6940900	C	T	0.99	0.84	0.93	0.81	0	0			E083,H3K4me3_Pro		.	CEBPB_known5	ENSG00000231273.1	5	8881	RP11-343D24.2	750	no protein, long intergenic non-preotein coding RNA
6	60917047	rs10155690	A	C	0.14	0.16	0.08	0.19	0	0					.	Nanog_disc1;Pou2f2_disc1;Pou2f2_known5;Pou2f2_known6;Pou2f2_known7;Pou2f2_known8;Pou3f3;TATA_disc9;THAP1_disc1	ENSG00000231273.1	3	193148	RP11-343D24.2	750	no protein, long intergenic non-preotein coding RNA
6	60944028	rs4715866	G	C	0.99	0.84	0.92	0.81	0	0					.	Pou3f2_2	ENSG00000231273.1	3	220129	RP11-343D24.2	750	no protein, long intergenic non-preotein coding RNA
6	60965062	rs1953711	C	T	0.99	0.84	0.92	0.81	0	0					.	AP-2_disc2;AP-2_known4;AP-2_known6	ENSG00000231273.1	3	241163	RP11-343D24.2	750	no protein, long intergenic non-preotein coding RNA
6	60968551	rs2340641	G	A	0.95	0.84	0.92	0.81	0	0					.	Evi-1_2;Mrg_2;RXRA_known1;T3R	ENSG00000231273.1	3	244652	RP11-343D24.2	750	no protein, long intergenic non-preotein coding RNA
6	60990915	rs1856253	G	C	0.99	0.84	0.92	0.81	0	0			E006,H3K9ac_Pro		.	DBP;HDAC2_disc6;Sox_3	ENSG00000231273.1	3	267016	RP11-343D24.2	750	no protein, long intergenic non-preotein coding RNA
6	60992550	rs4960492	A	T					0	0					.	BCL_disc4;Irf_disc3;Irf_known3;Irf_known9;NF-I_2;Pax-5_disc3;RXRA_disc4	ENSG00000231273.1	3	268651	RP11-343D24.2	750	no protein, long intergenic non-preotein coding RNA
12	132442096	rs10870468	C	T	0.24	0.33	0.19	0.4	0	0			E005,H3K9ac_Pro;E038,H3K9ac_Pro;E062,H3K9ac_Pro;E075,H3K9ac_Pro;E115,H3K9ac_Pro;E124,H3K9ac_Pro;E022,H3K4me1_Enh;E031,H3K4me1_Enh;E032,H3K4me1_Enh;E034,H3K4me1_Enh;E037,H3K4me1_Enh;E038,H3K4me1_Enh;E039,H3K4me1_Enh;E040,H3K4me1_Enh;E041,H3K4me1_Enh;E042,H3K4me1_Enh;E043,H3K4me1_Enh;E044,H3K4me1_Enh;E045,H3K4me1_Enh;E046,H3K4me1_Enh;E047,H3K4me1_Enh;E048,H3K4me1_Enh;E050,H3K4me1_Enh;E075,H3K4me1_E…	E086;E093;E100	.	LBP-9;TATA_disc3	ENSG00000256783.1	5	15063	RP11-503G7.1	2864	no protein, long intergenic non-preotein coding RNA
10	83690035	rs2065593	C	T	0.12	0.61	0.44	0.58	0	0					.	TATA_known1	ENSG00000233945.1	5	14595	RP11-344L13.2	3033	no protein, long intergenic non-preotein coding RNA
10	83695746	rs17324239	G	A	0.11	0.54	0.4	0.56	0	0			E067,H3K27ac_Enh;E073,H3K27ac_Enh;E117,H3K4me1_Enh		.	.	ENSG00000233945.1	5	20306	RP11-344L13.2	3033	no protein, long intergenic non-preotein coding RNA
13	22269169	rs17076477	A	G	0.0041	0.03	0.07	0.04	0	0					.	CTCF_disc1;CTCF_known1;ELF1_known1;PU.1_disc3;RXRA_disc2;Rad21_disc1;SMC3_disc1;TATA_disc7;YY1_known2;p300_disc5	ENSG00000226722.1	5	392490	LINC00424	5390	no protein, long intergenic non-preotein coding RNA
13	22269441	rs17076478	A	C	0.0041	0.03	0.07	0.04	0	0					.	Pax-5_known3;RXR::LXR;SIX5_disc4	ENSG00000226722.1	5	392762	LINC00424	5390	no protein, long intergenic non-preotein coding RNA
15	91682330	rs7402242	A	G	0.06	0.33	0.41	0.28	0	0			E007,H3K27ac_Enh;E016,H3K27ac_Enh;E106,H3K4me3_Pro		.	YY1_known3	ENSG00000258765.1	5	33215	RP11-692C24.2	6097	no protein, long intergenic non-preotein coding RNA
15	91687633	rs7403412	T	C	0.12	0.33	0.39	0.27	0	0			E081,H3K4me1_Enh		.	AP-1_disc6;Myc_disc7;THAP1_disc1;XBP-1_2	ENSG00000258765.1	5	38518	RP11-692C24.2	6097	no protein, long intergenic non-preotein coding RNA
15	91708328	rs12904129	T	C	0.21	0.49	0.27	0.64	0	0			E012,H3K27ac_Enh;E069,H3K27ac_Enh;E072,H3K27ac_Enh;E041,H3K4me1_Enh;E047,H3K4me1_Enh;E078,H3K4me3_Pro		.	ERalpha-a_disc2;Znf143_known1	ENSG00000258765.1	5	59213	RP11-692C24.2	6097	no protein, long intergenic non-preotein coding RNA
15	91685871	rs7497971	G	A	0.53	0.43	0.41	0.33	0	0			E024,H3K4me3_Pro		.	Cdx2_2;Hbp1;Pou2f2_known2;p300_disc6	ENSG00000258765.1	5	36756	RP11-692C24.2	6097	no protein, long intergenic non-preotein coding RNA
6	58022330	rs12214353	A	G	0.002	0.05	0.0017	0.07	0	0					.	Hoxa9;Mef2_disc1;Mef2_known1;Mef2_known5;Ncx_2;Osf2_2	ENSG00000225096.1	3	50111	XXbac-BPG55C20.7	6588	no protein, long intergenic non-preotein coding RNA
6	27123646	rs6913660	C	A	0.15	0.11	0.01	0.15	0	0			E049,H3K9ac_Pro;E065,H3K4me1_Enh;E123,H3K4me1_Enh		K562,CHD2,Stanford,None;K562,POL2S2,Stanford,None	BCL_disc4;CIZ;HDAC2_disc6;Irf_known9;PU.1_disc2;Pax-5_disc3;RXRA_disc4;p300_disc5	ENSG00000124635.6	3	2632	HIST1H2BJ	6853	gene
9	1139039	rs7866691	C	T	0.98	0.88	0.97	0.78	0	0			E037,H3K4me3_Pro;E083,H3K4me3_Pro;E103,H3K9ac_Pro;E110,H3K9ac_Pro		.	Hoxa5_1;Irf_known3;Irf_known9;NF-kappaB_known5;STAT_disc3	ENSG00000173253.10	3	81486	DMRT2	7694	gene
9	1154454	rs7871304	A	G	0.98	0.88	0.97	0.78	0	0			E052,H3K4me1_Enh		.	Pax-5_disc2;Sin3Ak-20_disc3	ENSG00000173253.10	3	96901	DMRT2	7694	gene
9	1158194	rs4741150	C	G	0.9	0.75	0.97	0.75	0	0			E007,H3K4me3_Pro;E090,H3K4me1_Enh;E093,H3K4me1_Enh;E094,H3K4me1_Enh;E093,H3K27ac_Enh		.	GR_disc6;GR_known4	ENSG00000173253.10	3	100641	DMRT2	7694	gene
9	1158199	rs4741151	A	G	0.9	0.75	0.97	0.75	0	0			E007,H3K4me3_Pro;E090,H3K4me1_Enh;E093,H3K4me1_Enh;E094,H3K4me1_Enh;E093,H3K27ac_Enh		.	GR_known4;GR_known5	ENSG00000173253.10	3	100646	DMRT2	7694	gene
9	1166780	rs4741162	A	G	0.91	0.86	0.97	0.75	0	0					.	Cdx2_1;Hoxa10;Hoxb13;Hoxd10;RFX5_known1	ENSG00000173253.10	3	109227	DMRT2	7694	gene
9	1169788	rs2152849	G	C	0.98	0.86	0.97	0.76	0	0			E005,H3K4me3_Pro;E094,H3K4me3_Pro;E007,H3K9ac_Pro;E055,H3K27ac_Enh;E079,H3K4me1_Enh;E101,H3K4me1_Enh		.	.	ENSG00000173253.10	3	112235	DMRT2	7694	gene
9	1170012	rs2152850	G	A	0.9	0.86	0.97	0.75	0	0			E005,H3K4me3_Pro;E094,H3K4me3_Pro;E101,H3K4me1_Enh		.	AIRE_2;CACD_2;Evi-1_5;Irf_known3;Klf4;Osf2_2;SIX5_disc4	ENSG00000173253.10	3	112459	DMRT2	7694	gene
9	1130580	rs4741117	G	A	0.97	0.88	0.97	0.81	0	0			E001,H3K4me3_Pro;E011,H3K9ac_Pro;E012,H3K27ac_Enh;E014,H3K4me1_Enh;E015,H3K4me1_Enh;E018,H3K4me1_Enh;E019,H3K4me1_Enh;E020,H3K4me1_Enh;E024,H3K4me1_Enh		.	BCL_disc7;NRSF_disc7;Zec	ENSG00000173253.10	3	73027	DMRT2	7694	gene
9	1137878	rs7031945	C	G	0.6	0.72	0.94	0.69	0	0			E012,H3K27ac_Enh;E103,H3K9ac_Pro		.	Evi-1_2;Evi-1_3;Isl2;Nkx3_1;Pou6f1_1	ENSG00000173253.10	3	80325	DMRT2	7694	gene
9	1142407	rs953168	T	C	0.6	0.73	0.94	0.68	0	0			E083,H3K4me3_Pro;E104,H3K4me1_Enh		.	.	ENSG00000173253.10	3	84854	DMRT2	7694	gene
9	1124027	rs10733226	G	C	0.35	0.51	0.28	0.59	0	0					.	Maf_known3;Pou2f2_known5;Smad_1	ENSG00000173253.10	3	66474	DMRT2	7694	gene
6	27218013	rs3800307	T	A	0.15	0.14	0.01	0.18	0	0			E020,H3K9ac_Pro;E024,H3K4me1_Enh;E055,H3K4me3_Pro;E056,H3K4me3_Pro		.	Foxj2_1;Foxl1_1;Foxo_1	ENSG00000112812.11	5	29687	PRSS16	8923	gene
6	27263371	rs6938200	A	G	0.21	0.14	0.01	0.19	0	0					.	TATA_known1;XBP-1_1;XBP-1_2	ENSG00000112812.11	3	6746	PRSS16	8923	gene
6	33086656	rs3749985	G	C	0.08	0.06	0.06	0.04	0	0			E003,H3K9ac_Pro;E062,H3K9ac_Pro;E063,H3K9ac_Pro;E041,H3K27ac_Enh;E074,H3K27ac_Enh;E124,H3K27ac_Enh;E053,H3K4me1_Enh;E074,H3K4me1_Enh		.	.	ENSG00000223865.5	0	0	HLA-DPB1	11275	gene
6	33087321	rs9501255	C	T	0.08	0.07	0.07	0.04	0	0			E028,H3K4me1_Enh;E041,H3K27ac_Enh;E074,H3K27ac_Enh;E062,H3K9ac_Pro;E063,H3K9ac_Pro	E033	.	Pax-5_known2;Rad21_disc3	ENSG00000223865.5	3	119	HLA-DPB1	11275	gene
8	131141424	rs13273225	G	A	0.15	0.08	0.35	0.06	0	0			E004,H3K27ac_Enh;E056,H3K27ac_Enh;E007,H3K4me1_Enh;E011,H3K4me1_Enh;E011,H3K4me3_Pro		.	Mef2_disc1;Mef2_known1;Mef2_known4;Sp100	ENSG00000253407.1	0	0	RP11-381I15.1	14493	no protein, long intergenic non-preotein coding RNA
8	111811702	rs7009072	A	G	0.92	0.59	0.57	0.74	0	0			E088,H3K4me1_Enh		.	HDAC2_disc6;Mef2_known1;Mef2_known4;Pou1f1_1;TATA_known1;TATA_known2;TATA_known4;TATA_known5;p300_disc5	ENSG00000254262.1	3	54875	RP11-58O3.2	14814	no protein, long intergenic non-preotein coding RNA
16	51213468	rs6416795	A	G	0.89	0.76	0.68	0.69	0	0			E011,H3K4me1_Enh;E024,H3K4me1_Enh;E011,H3K4me3_Pro		.	.	ENSG00000103449.7	5	62100	SALL1	15392	gene
11	113970281	rs10789980	A	G	0.6	0.61	0.45	0.47	0	0			E031,H3K4me1_Enh;E096,H3K4me3_Pro		.	Sox_5	ENSG00000166736.7	5	4599	HTR3A	15432	gene
19	4821600	rs4807650	C	T	0.81	0.57	0.53	0.52	0	0			E056,H3K27ac_Enh;E066,H3K4me1_Enh;E094,H3K4me1_Enh		.	AP-2rep	ENSG00000127666.7	0	0	TICAM1	15772	gene
19	8376973	rs1808536	A	G	0.72	0.78	0.36	0.82	0	0			E002,H3K4me1_Enh;E034,H3K4me1_Enh;E037,H3K4me1_Enh;E043,H3K4me1_Enh;E045,H3K4me1_Enh;E047,H3K4me1_Enh;E056,H3K4me1_Enh;E089,H3K4me1_Enh;E096,H3K4me1_Enh;E098,H3K4me1_Enh;E007,H3K9ac_Pro;E066,H3K27ac_Enh;E069,H3K27ac_Enh;E071,H3K27ac_Enh;E074,H3K27ac_Enh;E094,H3K27ac_Enh;E118,H3K27ac_Enh		.	Myc_disc6;Nr2f2	ENSG00000167772.6	3	2599	ANGPTL4	17247	gene
3	172484660	rs2901790	C	T	0.16	0.22	0.48	0.25	0	0			E010,H3K4me1_Enh;E011,H3K27ac_Enh		.	HDAC2_disc3;Pax-2_1	ENSG00000121858.6	3	20847	TNFSF10	17999	gene
4	152214800	rs11728805	C	T	0.18	0.07	0.12	0.08	0	0			E002,H3K4me3_Pro;E067,H3K27ac_Enh;E069,H3K27ac_Enh;E072,H3K27ac_Enh		.	GR_disc4;TATA_disc1;YY1_disc1;YY1_known2;YY1_known3;YY1_known5;Zic_1	ENSG00000251377.1	0	0	RP11-18H21.3	18449	no protein, long intergenic non-preotein coding RNA
4	152213807	rs11727661	C	A	0.24	0.09	0.13	0.11	0	0			E067,H3K27ac_Enh;E072,H3K27ac_Enh;E101,H3K9ac_Pro		.	GR_known8;Pax-5_disc3;Pax-6_2;RXRA_disc4;TR4_disc1	ENSG00000251377.1	0	0	RP11-18H21.3	18449	no protein, long intergenic non-preotein coding RNA
4	152214267	rs11727800	C	T	0.25	0.09	0.13	0.11	0	0			E067,H3K27ac_Enh;E069,H3K27ac_Enh;E072,H3K27ac_Enh		.	Foxa_disc4;HNF4_known3;LXR_3;RAR;RXRA_disc1;RXRA_known2;STAT_disc5	ENSG00000251377.1	0	0	RP11-18H21.3	18449	no protein, long intergenic non-preotein coding RNA
4	152214720	rs11732361	T	C	0.25	0.09	0.13	0.11	0	0			E002,H3K4me3_Pro;E067,H3K27ac_Enh;E069,H3K27ac_Enh;E072,H3K27ac_Enh		.	Irf_disc4;Klf4;Klf7;MAZR;SP1_disc3;SP1_known2;SP1_known4;STAT_disc7;TATA_disc4;Zfp281	ENSG00000251377.1	0	0	RP11-18H21.3	18449	no protein, long intergenic non-preotein coding RNA
4	152214931	rs4309822	A	G	0.25	0.09	0.13	0.11	0	0			E002,H3K4me3_Pro;E067,H3K27ac_Enh;E069,H3K27ac_Enh;E072,H3K27ac_Enh		.	Hoxa5_1;Pou3f2_2;RBP-Jkappa_1;RBP-Jkappa_2	ENSG00000251377.1	0	0	RP11-18H21.3	18449	no protein, long intergenic non-preotein coding RNA
4	1117179	rs17164346	G	A	0.01	0.01	0	0.03	0	1		E054,19_DNase;E082,19_DNase	E027,H3K4me1_Enh;E053,H3K4me1_Enh;E054,H3K4me1_Enh;E068,H3K4me1_Enh;E071,H3K4me1_Enh;E074,H3K4me1_Enh;E086,H3K4me1_Enh;E087,H3K4me1_Enh;E098,H3K4me1_Enh;E047,H3K9ac_Pro;E049,H3K9ac_Pro;E062,H3K9ac_Pro;E072,H3K9ac_Pro;E068,H3K27ac_Enh;E073,H3K27ac_Enh;E097,H3K4me3_Pro		.	Sox_3	ENSG00000251652.1	0	0	RP11-20I20.2	19338	no protein, long intergenic non-preotein coding RNA
4	1121942	rs17164350	T	C	0.09	0.02	0	0.03	0	0			E008,H3K9ac_Pro;E027,H3K9ac_Pro;E025,H3K4me1_Enh;E056,H3K4me1_Enh		.	AIRE_1;Pax-4_5;TAL1_known2	ENSG00000251652.1	0	0	RP11-20I20.2	19338	no protein, long intergenic non-preotein coding RNA
6	61043533	rs1337895	C	T	0.95	0.84	0.92	0.81	0	0			E063,H3K4me3_Pro;E068,H3K4me3_Pro;E071,H3K4me3_Pro;E083,H3K4me3_Pro;E098,H3K4me3_Pro		.	.	ENSG00000236143.1	5	232093	XXbac-BPG55C20.6	23845	no protein, pseudogene
6	61046496	rs1123892	G	A	0.95	0.84	0.92	0.81	0	0					.	Hoxa3_1;Nkx6-1_1	ENSG00000236143.1	5	229130	XXbac-BPG55C20.6	23845	no protein, pseudogene
6	61054809	rs3904828	T	C	0.99	0.84	0.92	0.81	0	0					.	Foxj2_2;GR_known1	ENSG00000236143.1	5	220817	XXbac-BPG55C20.6	23845	no protein, pseudogene
6	61057256	rs6459322	G	A	0.95	0.84	0.92	0.81	0	0					.	CDP_2;HNF6;Sox_3;Sox_7	ENSG00000236143.1	5	218370	XXbac-BPG55C20.6	23845	no protein, pseudogene
6	61063277	rs3851534	C	T	0.95	0.84	0.92	0.81	0	0					.	Foxi1;Foxl1_1;HP1-site-factor;Nkx2_1;Nkx6-2	ENSG00000236143.1	5	212349	XXbac-BPG55C20.6	23845	no protein, pseudogene
6	61078024	rs3904827	A	G	0.98	0.85	0.89	0.81	0	0					.	Mef2_disc3;Mef2_known4;Rhox11	ENSG00000236143.1	5	197602	XXbac-BPG55C20.6	23845	no protein, pseudogene
6	61079907	rs9370718	T	C	0.98	0.85	0.92	0.81	0	0					.	Pax-4_5	ENSG00000236143.1	5	195719	XXbac-BPG55C20.6	23845	no protein, pseudogene
6	61087485	rs4960510	T	C	0.99	0.85	0.92	0.81	0	0					.	Foxd3;Foxj2_1	ENSG00000236143.1	5	188141	XXbac-BPG55C20.6	23845	no protein, pseudogene
6	61088180	rs1337897	G	A	0.95	0.85	0.92	0.81	0	0					.	CEBPB_known4;Zfp691;Znf143_known1	ENSG00000236143.1	5	187446	XXbac-BPG55C20.6	23845	no protein, pseudogene
6	61093093	rs1933175	T	C	0.95	0.85	0.92	0.81	0	0					.	AP-1_disc2;Barx1;NF-Y_known2;Zfp187	ENSG00000236143.1	5	182533	XXbac-BPG55C20.6	23845	no protein, pseudogene
6	61097991	rs4487631	T	A	0.95	0.85	0.92	0.81	0	0					.	BAF155_disc2;TATA_known2;TATA_known3;TATA_known4	ENSG00000236143.1	5	177635	XXbac-BPG55C20.6	23845	no protein, pseudogene
6	61104371	rs4039843	A	T	0.94	0.85	0.92	0.81	0	0					.	Cdx;Dbx1;Irx;Ncx_2;Pou3f4;Zfp187	ENSG00000236143.1	5	171255	XXbac-BPG55C20.6	23845	no protein, pseudogene
6	61066176	rs9358022	A	G	0.94	0.82	0.91	0.78	0	0					.	.	ENSG00000236143.1	5	209450	XXbac-BPG55C20.6	23845	no protein, pseudogene
6	58186454	rs3864327	A	G	0.44	0.13	0.09	0.19	0	0					.	Dobox4;Foxj2_1;IRC900814;SIX5_known2	ENSG00000223633.1	3	23704	RP11-143A22.1	24972	no protein, long intergenic non-preotein coding RNA
6	58275476	rs1850417	A	T	1	0.9	1	0.89	0	0			E014,H3K4me3_Pro;E016,H3K4me3_Pro;E020,H3K4me3_Pro		.	HDAC2_disc6;TATA_disc7	ENSG00000223633.1	3	112726	RP11-143A22.1	24972	no protein, long intergenic non-preotein coding RNA
6	27310241	rs16897515	C	A	0.26	0.16	0.02	0.16	0	0			E007,H3K4me3_Pro;E018,H3K4me3_Pro;E024,H3K4me3_Pro;E044,H3K4me3_Pro;E055,H3K4me3_Pro;E056,H3K4me3_Pro;E071,H3K4me3_Pro;E094,H3K4me3_Pro;E102,H3K4me3_Pro;E105,H3K4me3_Pro;E113,H3K4me3_Pro;E021,H3K27ac_Enh;E022,H3K27ac_Enh;E038,H3K9ac_Pro;E101,H3K9ac_Pro;E079,H3K4me1_Enh;E094,H3K4me1_Enh;E098,H3K4me1_Enh;E113,H3K4me1_Enh		.	CEBPG	ENSG00000158553.3	0	0	POM121L2	26267	gene
6	27315475	rs2893910	A	T	0.26	0.17	0.02	0.17	0	0			E047,H3K4me3_Pro;E063,H3K9ac_Pro;E066,H3K9ac_Pro		.	.	ENSG00000158553.3	5	3304	POM121L2	26267	gene
6	25760981	rs4236040	T	C	0.84	0.93	0.98	0.91	0	0			E066,H3K4me1_Enh;E084,H3K4me1_Enh;E101,H3K4me1_Enh;E102,H3K4me1_Enh;E066,H3K9ac_Pro		.	Nkx2_4	ENSG00000146039.6	0	0	SLC17A4	26492	gene
6	25763964	rs4712969	A	G	0.84	0.93	0.98	0.91	0	0			E048,H3K4me3_Pro;E084,H3K4me1_Enh		.	STAT_disc4	ENSG00000146039.6	0	0	SLC17A4	26492	gene
6	25767209	rs6902211	G	A	0.8	0.93	0.98	0.91	0	0			E099,H3K4me3_Pro		.	AFP1;FAC1;Foxp1;Mef2_disc1;Mef2_known2;Mef2_known5	ENSG00000146039.6	0	0	SLC17A4	26492	gene
18	54349495	rs1657890	C	T	0.96	0.66	0.72	0.68	0	0			E098,H3K27ac_Enh		.	DMRT1;Pou3f2_2	ENSG00000174448.3	0	0	STARD6	33606	gene
15	79563951	rs1932997	T	C	0.28	0.18	0.17	0.13	0	0			E008,H3K27ac_Enh;E049,H3K9ac_Pro;E083,H3K4me3_Pro;E110,H3K4me1_Enh		.	AP-1_disc8;BCL_disc5;FXR_1;Foxa_disc4;HEN1_1;HMGN3_disc2;Mef2_disc2;STAT_disc5	ENSG00000169330.4	3	91660	KIAA1024	39774	gene
6	25872351	rs972087	A	G	0.23	0.08	0.14	0.1	0	0			E034,H3K27ac_Enh;E037,H3K27ac_Enh;E042,H3K27ac_Enh;E045,H3K27ac_Enh;E037,H3K4me1_Enh;E040,H3K4me1_Enh;E041,H3K4me1_Enh;E042,H3K4me1_Enh;E043,H3K4me1_Enh;E045,H3K4me1_Enh;E066,H3K4me1_Enh;E045,H3K4me3_Pro		.	Foxp1;HNF4_disc1;Nanog_disc2;PRDM1_known1	ENSG00000124564.13	0	0	SLC17A3	49220	gene
6	61528631	rs214140	G	A	0.04	0.15	0.08	0.19	0	0			E083,H3K4me3_Pro		.	Bbx;DMRT1;DMRT2;Fox;Foxd3;Foxi1;Foxj1_1;HNF4_disc4	ENSG00000250686.1	3	101601	RP1-240B8.3	50816	no protein, long intergenic non-preotein coding RNA
1	37762544	rs605359	A	C,G,T	0.89	0.87	1	0.82	0	0			E003,H3K9ac_Pro;E007,H3K9ac_Pro;E068,H3K9ac_Pro;E072,H3K9ac_Pro;E006,H3K4me3_Pro;E007,H3K4me3_Pro;E067,H3K4me3_Pro;E068,H3K4me3_Pro;E071,H3K4me3_Pro;E073,H3K4me3_Pro;E082,H3K4me3_Pro;E113,H3K4me3_Pro;E056,H3K27ac_Enh;E067,H3K27ac_Enh;E068,H3K27ac_Enh;E072,H3K27ac_Enh;E073,H3K27ac_Enh;E067,H3K4me1_Enh;E068,H3K4me1_Enh;E070,H3K4me1_Enh;E073,H3K4me1_Enh;E081,H3K4me1_Enh		.	.	ENSG00000183317.11	0	0	EPHA10	51253	gene
18	54316534	rs664501	C	A	0.96	0.66	0.72	0.69	0	0			E015,H3K27ac_Enh;E018,H3K9ac_Pro;E023,H3K4me1_Enh	E022;E119;E120	.	AP-1_known2;BRCA1_known2;Foxa_disc1;Foxa_known3;HDAC2_disc2;HNF4_disc3;Irf_disc2;Maf_disc1;TCF12_disc2	ENSG00000101751.6	0	0	POLI	51862	gene
18	54317405	rs535154	G	A	0.33	0.6	0.72	0.69	0	0			E008,H3K27ac_Enh		.	Pou2f2_known2;Pou2f2_known5;Pou3f3;RFX5_known1	ENSG00000101751.6	0	0	POLI	51862	gene
18	54317425	rs1787828	A	G	0.35	0.61	0.72	0.69	0	0			E008,H3K27ac_Enh		.	Dbx2;Pou2f2_known3;Pou2f2_known4;Pou6f1_2	ENSG00000101751.6	0	0	POLI	51862	gene
18	54317536	rs649722	G	A	0.33	0.61	0.72	0.69	0	0			E008,H3K27ac_Enh		.	Hmx_2;Nkx2_4;Nkx3_3	ENSG00000101751.6	0	0	POLI	51862	gene
18	71584278	rs12961992	C	A	0.07	0.41	0.23	0.36	0	0			E011,H3K4me3_Pro;E014,H3K4me3_Pro;E016,H3K4me3_Pro;E083,H3K4me3_Pro;E088,H3K4me1_Enh		.	Mef2_known1;Mef2_known2;Mef2_known4;TATA_known1	ENSG00000260676.1	5	5321	RP11-510D19.1	58994	no protein, long intergenic non-preotein coding RNA
18	71585449	rs1539919	G	A	0.1	0.4	0.21	0.36	0	0			E011,H3K4me3_Pro;E083,H3K4me3_Pro;E088,H3K4me1_Enh		.	Hoxa5_1;Lhx4;Lhx8;Pou1f1_1	ENSG00000260676.1	5	6492	RP11-510D19.1	58994	no protein, long intergenic non-preotein coding RNA
18	71585572	rs1539918	C	T	0.1	0.4	0.21	0.36	0	0			E011,H3K4me3_Pro;E083,H3K4me3_Pro;E088,H3K4me1_Enh		.	Smad3_2	ENSG00000260676.1	5	6615	RP11-510D19.1	58994	no protein, long intergenic non-preotein coding RNA
8	2683828	rs6558679	A	T	0.77	0.46	0.36	0.53	0	0			E008,H3K27ac_Enh		.	Barx1;Bsx;Cart1;Gbx1;Isx;Lhx4;Lhx8;Pou2f2_known1;Pou2f2_known2;Pou2f2_known6;Pou2f2_known9;Pou3f2_3;Sox_2;p300_disc6	ENSG00000254319.1	0	0	RP11-134O21.1	62372	no protein, long intergenic non-preotein coding RNA
11	13602542	rs7948130	G	A	0.49	0.15	0.27	0.17	0	0			E006,H3K9ac_Pro;E011,H3K4me1_Enh	E125	.	GATA_known10;Smad3_2	ENSG00000197601.8	5	66127	FAR1	63676	gene
9	33132520	rs10511909	G	C	0.13	0.13	0.0017	0.12	0	0			E005,H3K27ac_Enh;E008,H3K27ac_Enh;E013,H3K27ac_Enh;E017,H3K27ac_Enh;E026,H3K27ac_Enh;E032,H3K27ac_Enh;E034,H3K27ac_Enh;E037,H3K27ac_Enh;E041,H3K27ac_Enh;E042,H3K27ac_Enh;E043,H3K27ac_Enh;E044,H3K27ac_Enh;E045,H3K27ac_Enh;E046,H3K27ac_Enh;E048,H3K27ac_Enh;E049,H3K27ac_Enh;E055,H3K27ac_Enh;E056,H3K27ac_Enh;E058,H3K27ac_Enh;E059,H3K27ac_Enh;E061,H3K27ac_Enh;E063,H3K27ac_Enh;E066,H3K27ac_Enh;E067,H3K…	E006;E017;E028;E055;E056;E057;E089;E114;E117;E119;E120;E121;E123;E124;E125;E126;E127;E128	T-REx-HEK293,ZNF263,UCD,None	.	ENSG00000086062.8	0	0	B4GALT1	63718	gene
12	100407285	rs10860589	C	T	1	0.97	1	0.97	0	0					.	CEBPB_disc1;CEBPB_known1;CEBPB_known6;En-1_2;Foxa_disc1;Hsf_disc1;TCF12_disc2;p300_disc2	ENSG00000179520.5	0	0	SLC17A8	64980	gene
11	13414236	rs10766081	G	A	0.67	0.78	0.5	0.84	0	0			E061,H3K4me1_Enh		.	Barhl1;Isl2;Nkx2_11;Nkx2_3;Nkx2_4;Nkx3_3;Nkx3_5	ENSG00000148925.5	0	0	BTBD10	75296	gene
11	13436411	rs10832034	A	G	0.67	0.78	0.5	0.84	0	0			E001,H3K4me1_Enh;E003,H3K4me1_Enh;E004,H3K4me1_Enh;E011,H3K4me1_Enh;E014,H3K4me1_Enh;E015,H3K4me1_Enh;E016,H3K4me1_Enh;E017,H3K4me1_Enh;E018,H3K4me1_Enh;E019,H3K4me1_Enh;E020,H3K4me1_Enh;E022,H3K4me1_Enh;E023,H3K4me1_Enh;E024,H3K4me1_Enh;E027,H3K4me1_Enh;E028,H3K4me1_Enh;E029,H3K4me1_Enh;E030,H3K4me1_Enh;E034,H3K4me1_Enh;E037,H3K4me1_Enh;E039,H3K4me1_Enh;E040,H3K4me1_Enh;E041,H3K4me1_Enh;E043,H3K…	E091	.	GLI;Sp4	ENSG00000148925.5	0	0	BTBD10	75296	gene
6	84796504	rs215930	G	T	0.07	0.26	0.08	0.43	0	0			E056,H3K4me1_Enh		K562b,SETDB1,UCD,None;U2OS,SETDB1,UCD,None	Irf_known1;STAT_disc6	ENSG00000112837.11	5	31984	TBX18	77168	gene
6	84782327	rs10455438	G	A	0.05	0.22	0.07	0.36	0	0			E055,H3K27ac_Enh;E055,H3K4me1_Enh;E056,H3K4me1_Enh;E066,H3K4me1_Enh;E098,H3K4me1_Enh	E090	.	CCNT2_disc2;MZF1::1-4_1;MZF1::1-4_2;MZF1::1-4_3;PU.1_disc3;Pax-4_4;Pax-4_5;SP1_disc3;Spz1_1;ZBRK1;Zfp281;Zfp740;Znf143_disc3	ENSG00000112837.11	5	17807	TBX18	77168	gene
4	165706844	rs17688831	T	C	0.01	0.12	0.12	0.1	0	0			E066,H3K4me1_Enh		.	Hdx;ZEB1_known5	ENSG00000249500.1	0	0	RP11-340B18.1	78139	no protein, long intergenic non-preotein coding RNA
6	100386187	rs2295595	G	C	0.01	0.11	0.21	0.08	0	0			E052,H3K4me1_Enh;E055,H3K4me1_Enh;E056,H3K4me1_Enh;E087,H3K4me1_Enh		.	Bbx;Gfi1_3;Znf143_known1	ENSG00000112246.5	0	0	SIM1	79914	gene
6	100391418	rs3798515	T	C	0.01	0.11	0.21	0.08	0	0					.	Brachyury_1;GATA_known9	ENSG00000112246.5	0	0	SIM1	79914	gene
6	100396229	rs3778036	T	C	0.01	0.12	0.21	0.08	0	0			E007,H3K4me3_Pro;E065,H3K4me1_Enh;E087,H3K4me1_Enh		.	.	ENSG00000112246.5	0	0	SIM1	79914	gene
6	100404877	rs3798511	T	C	0.05	0.12	0.21	0.08	0	0			E020,H3K4me1_Enh;E055,H3K4me1_Enh;E087,H3K4me1_Enh		.	.	ENSG00000112246.5	0	0	SIM1	79914	gene
6	100411060	rs3798504	A	T	0.01	0.12	0.21	0.08	0	0			E008,H3K9ac_Pro;E011,H3K4me1_Enh;E087,H3K4me1_Enh;E121,H3K4me1_Enh		.	Foxk1;Foxp1;HNF1_7;Pou1f1_1;Sox_13;Sox_14;Sox_2;Sox_9	ENSG00000112246.5	0	0	SIM1	79914	gene
7	97343627	rs13247934	T	G	0.25	0.38	0.29	0.34	0	0			E021,H3K27ac_Enh;E080,H3K4me1_Enh;E084,H3K4me1_Enh		.	.	ENSG00000221192.1	5	52030	AC004745.1	97137	bacterial clone
3	38931101	rs7636049	C	T	0.45	0.18	0.28	0.22	0	0			E008,H3K27ac_Enh;E097,H3K27ac_Enh;E099,H3K4me3_Pro;E113,H3K4me3_Pro;E113,H3K4me1_Enh		.	.	ENSG00000168356.7	0	0	SCN11A	104792	gene
16	24300308	rs8055531	G	T	0.21	0.13	0.01	0.32	0	0			E012,H3K27ac_Enh;E117,H3K27ac_Enh;E117,H3K4me1_Enh		.	GR_disc1	ENSG00000006116.3	0	0	CACNG3	107248	gene
16	24304243	rs7200040	G	A	0.64	0.35	0.14	0.38	0	0			E050,H3K27ac_Enh		.	AP-1_disc4;CIZ;CTCF_disc4;Evi-1_4;Homez;Ik-2_3;Mef2_disc1;Mef2_known5;NF-AT1;RBP-Jkappa_1;RBP-Jkappa_2;Sox_14	ENSG00000006116.3	0	0	CACNG3	107248	gene
3	113907798	rs4682146	C	G	0.08	0.35	0.42	0.31	0	0			E047,H3K9ac_Pro;E062,H3K9ac_Pro;E075,H3K4me1_Enh;E102,H3K4me1_Enh;E102,H3K27ac_Enh		.	Foxd1_1;Foxj1_2;Foxj2_1;Foxk1;Foxo_1;Foxo_3;Foxp1;Sox_14;Sox_18;Sox_19;Sox_2;Sox_7	ENSG00000178075.14	0	0	GRAMD1C	118992	gene
18	73972417	rs2702593	G	A	0.57	0.82	0.71	0.89	0	0			E055,H3K27ac_Enh;E105,H3K27ac_Enh;E105,H3K4me3_Pro		.	Evi-1_5;PLAG1;ZBRK1	ENSG00000263655.1	0	0	RP11-25L3.3	119756	no protein, long intergenic non-preotein coding RNA
3	37915721	rs6768915	A	G	0.17	0.03	0	0.03	0	0			E013,H3K27ac_Enh;E020,H3K27ac_Enh;E067,H3K27ac_Enh;E071,H3K27ac_Enh;E073,H3K27ac_Enh;E118,H3K27ac_Enh;E121,H3K27ac_Enh;E013,H3K4me1_Enh;E027,H3K4me1_Enh;E030,H3K4me1_Enh;E050,H3K4me1_Enh;E061,H3K4me1_Enh;E069,H3K4me1_Enh;E073,H3K4me1_Enh;E076,H3K4me1_Enh;E087,H3K4me1_Enh;E110,H3K4me1_Enh;E118,H3K4me1_Enh;E027,H3K9ac_Pro;E072,H3K9ac_Pro		.	Foxp3;GATA_known12;Hlx1;NF-kappaB_disc3	ENSG00000144677.10	0	0	CTDSPL	122509	gene
16	77416156	rs8059111	A	G	0.5	0.55	0.21	0.71	0	0			E005,H3K27ac_Enh;E069,H3K27ac_Enh;E074,H3K27ac_Enh;E067,H3K4me3_Pro;E073,H3K4me3_Pro;E074,H3K4me1_Enh;E098,H3K4me1_Enh;E100,H3K4me1_Enh		.	Foxa_disc1;Foxa_known1;Foxa_known2;Foxa_known3;Foxj1_1;Nanog_disc1;Pou2f2_disc1;Pou2f2_known10;Pou2f2_known6;Pou2f2_known7;TCF12_disc2;p300_disc3	ENSG00000140873.11	0	0	ADAMTS18	159987	gene
16	77417586	rs11149989	A	G	0.5	0.55	0.21	0.71	0	0			E005,H3K27ac_Enh;E069,H3K27ac_Enh;E074,H3K4me1_Enh		.	.	ENSG00000140873.11	0	0	ADAMTS18	159987	gene
16	77418313	rs10781985	G	A	0.46	0.55	0.21	0.71	0	0			E003,H3K9ac_Pro;E027,H3K9ac_Pro;E005,H3K27ac_Enh;E011,H3K27ac_Enh;E069,H3K27ac_Enh;E012,H3K4me1_Enh;E016,H3K4me1_Enh;E027,H3K4me1_Enh;E067,H3K4me1_Enh;E069,H3K4me1_Enh;E072,H3K4me1_Enh;E074,H3K4me1_Enh	E091	.	Gm397;Pax-4_4	ENSG00000140873.11	0	0	ADAMTS18	159987	gene
16	77418330	rs10781986	A	G	0.46	0.55	0.21	0.71	0	0			E003,H3K9ac_Pro;E027,H3K9ac_Pro;E005,H3K27ac_Enh;E011,H3K27ac_Enh;E069,H3K27ac_Enh;E012,H3K4me1_Enh;E016,H3K4me1_Enh;E027,H3K4me1_Enh;E067,H3K4me1_Enh;E069,H3K4me1_Enh;E072,H3K4me1_Enh;E074,H3K4me1_Enh	E091	.	Hoxc10	ENSG00000140873.11	0	0	ADAMTS18	159987	gene
16	77418344	rs10781987	T	C	0.46	0.55	0.21	0.71	0	0			E003,H3K9ac_Pro;E027,H3K9ac_Pro;E005,H3K27ac_Enh;E011,H3K27ac_Enh;E069,H3K27ac_Enh;E012,H3K4me1_Enh;E016,H3K4me1_Enh;E027,H3K4me1_Enh;E067,H3K4me1_Enh;E069,H3K4me1_Enh;E072,H3K4me1_Enh;E074,H3K4me1_Enh	E091	.	GR_known6	ENSG00000140873.11	0	0	ADAMTS18	159987	gene
16	77420295	rs12934271	G	A	0.45	0.54	0.21	0.71	0	0			E005,H3K27ac_Enh;E011,H3K27ac_Enh;E067,H3K27ac_Enh;E069,H3K27ac_Enh;E072,H3K27ac_Enh;E074,H3K27ac_Enh;E005,H3K4me1_Enh;E010,H3K4me1_Enh;E012,H3K4me1_Enh;E027,H3K4me1_Enh;E063,H3K4me1_Enh;E067,H3K4me1_Enh;E069,H3K4me1_Enh;E071,H3K4me1_Enh;E072,H3K4me1_Enh;E074,H3K4me1_Enh;E088,H3K4me1_Enh;E067,H3K4me3_Pro;E074,H3K4me3_Pro		.	THAP1_disc1;YY1_disc1	ENSG00000140873.11	0	0	ADAMTS18	159987	gene
2	40970871	rs13023575	T	C	0.22	0.46	0.43	0.59	0	0					.	p53_2	ENSG00000241522.1	5	172908	AC009223.2	182144	bacterial clone
10	84622701	rs11201130	T	C	0	0.08	0.08	0.04	0	0					.	.	ENSG00000107771.11	3	104183	FAM190B	189935	gene
10	84623566	rs11201132	C	G	0	0.08	0.08	0.04	0	0				E091;E124	.	.	ENSG00000107771.11	3	105048	FAM190B	189935	gene
10	84623963	rs10887337	A	T	0	0.08	0.08	0.04	0	0			E002,H3K4me3_Pro;E016,H3K4me1_Enh;E091,H3K4me1_Enh	E091	.	Mrg1::Hoxa9_1;Mrg1::Hoxa9_2	ENSG00000107771.11	3	105445	FAM190B	189935	gene
5	174391447	rs2964041	C	G	0.37	0.04	0.07	0.03	0	0					.	MZF1::1-4_3;STAT_known6	ENSG00000249306.1	0	0	RP11-267A15.1	196162	no protein, long intergenic non-preotein coding RNA
5	174395263	rs2936944	C	T	0.22	0.02	0.07	0.03	0	0			E013,H3K4me1_Enh		.	Cdx2_1;Sox_17	ENSG00000249306.1	0	0	RP11-267A15.1	196162	no protein, long intergenic non-preotein coding RNA
5	174397174	rs2936942	A	C	0.21	0.02	0.07	0.03	0	0			E011,H3K4me1_Enh;E013,H3K4me1_Enh;E117,H3K4me1_Enh		.	E2F_disc6;Mrg_2;Nanog_disc4;Pou5f1_disc1;Pou5f1_known1;Tgif1_1;Tgif1_2	ENSG00000249306.1	0	0	RP11-267A15.1	196162	no protein, long intergenic non-preotein coding RNA
5	174401136	rs2936939	C	T	0.21	0.03	0.08	0.04	0	0			E005,H3K4me1_Enh;E007,H3K4me1_Enh;E011,H3K4me1_Enh;E012,H3K4me1_Enh;E015,H3K4me1_Enh;E117,H3K4me1_Enh;E006,H3K9ac_Pro		.	ZEB1_known2	ENSG00000249306.1	0	0	RP11-267A15.1	196162	no protein, long intergenic non-preotein coding RNA
5	174403990	rs2964050	A	G	0.21	0.02	0.07	0.03	0	0					.	Nrf-2_2;Nrf-2_3;TCF11::MafG	ENSG00000249306.1	0	0	RP11-267A15.1	196162	no protein, long intergenic non-preotein coding RNA
5	174404444	rs2913507	T	C	0.21	0.02	0.07	0.03	0	0			E005,H3K4me1_Enh		.	GATA_known1;GATA_known14;GATA_known4	ENSG00000249306.1	0	0	RP11-267A15.1	196162	no protein, long intergenic non-preotein coding RNA
5	174404926	rs2913508	G	A	0.21	0.02	0.07	0.03	0	0			E005,H3K4me1_Enh		.	AhR::Arnt_2;AhR_1;Arnt_2;Egr-1_known4;GLI;GR_disc6;Irf_disc4;Klf4;NRSF_disc9;Pou2f2_disc2;RREB-1_1;RREB-1_2	ENSG00000249306.1	0	0	RP11-267A15.1	196162	no protein, long intergenic non-preotein coding RNA
5	174405784	rs2913512	T	C	0.06	0.02	0.07	0.03	0	0					.	Dbx1;Fox;Foxa_known1;Foxa_known2;Foxa_known4;Foxd3;Foxf1;Foxj1_1;Foxj1_2;Foxj2_1;Foxl1_1;Foxo_1;Foxo_3;Hoxd8;Sox_7;Zfp105	ENSG00000249306.1	0	0	RP11-267A15.1	196162	no protein, long intergenic non-preotein coding RNA
5	174405863	rs2913513	G	A	0.21	0.02	0.07	0.03	0	0					.	Evi-1_2;Evi-1_5;FAC1;Irf_disc3;Osf2_2;RREB-1_2;SIX5_disc1;SIX5_disc4;p53_3	ENSG00000249306.1	0	0	RP11-267A15.1	196162	no protein, long intergenic non-preotein coding RNA
2	56612004	rs6545583	G	T	0.86	0.91	0.94	0.87	0	0			E120,H3K4me1_Enh		.	CHX10;En-1_3;Esx1;Gbx2;HNF1_4;Hlxb9;Hoxa3_2;Hoxa5_3;Hoxb3;Hoxb4;Hoxb7;Isx;Msx2;Nobox_1;Nobox_2;Pax-4_2;Pax-6_3;Pax7;Phox2a;Pou2f2_known4;Pou3f2_4;Prrx2_1;Vax2;Zfp187	ENSG00000055813.4	3	225830	CCDC85A	202050	gene
2	56612944	rs2870070	A	G	0.73	0.91	0.94	0.87	0	0			E052,H3K4me1_Enh;E099,H3K4me1_Enh;E120,H3K4me1_Enh;E120,H3K27ac_Enh		.	NRSF_disc10;TATA_disc8;Zfp410	ENSG00000055813.4	3	226770	CCDC85A	202050	gene
2	56621616	rs2112020	G	T	0.72	0.9	0.94	0.86	0	0			E005,H3K4me3_Pro;E006,H3K4me3_Pro		.	Hoxa5_1;Nrf1_known2	ENSG00000055813.4	3	235442	CCDC85A	202050	gene
2	56628911	rs17190415	G	A	0.01	0.07	0.06	0.13	0	0					.	CDP_7;Cart1;Pou5f1_known2	ENSG00000055813.4	3	242737	CCDC85A	202050	gene
2	56594748	rs12713318	T	G	0.78	0.91	0.94	0.86	0	0			E021,H3K27ac_Enh;E063,H3K27ac_Enh;E023,H3K4me1_Enh;E063,H3K4me1_Enh;E023,H3K9ac_Pro;E038,H3K9ac_Pro;E040,H3K4me3_Pro		.	HDAC2_disc6;Irf_disc3;Irf_known10;Pou2f2_known2;Pou2f2_known6;STAT_known13;TATA_disc7;p300_disc10	ENSG00000055813.4	3	208574	CCDC85A	202050	gene
2	134590315	rs842360	T	C	0.41	0.54	0.78	0.44	0	0			E001,H3K4me3_Pro;E014,H3K4me3_Pro;E016,H3K4me3_Pro;E020,H3K4me3_Pro;E083,H3K4me3_Pro;E102,H3K4me3_Pro;E003,H3K27ac_Enh;E011,H3K27ac_Enh;E020,H3K27ac_Enh;E082,H3K4me1_Enh;E083,H3K4me1_Enh;E098,H3K4me1_Enh		.	p53_3	ENSG00000152128.13	0	0	TMEM163	263241	gene
6	148603481	rs12194090	G	A	0.08	0.13	0.05	0.25	0	0			E008,H3K27ac_Enh;E011,H3K4me3_Pro;E020,H3K4me3_Pro;E020,H3K4me1_Enh;E115,H3K4me1_Enh		.	Pou3f1;Sox_5	ENSG00000111961.12	3	51430	SASH1	279746	gene
6	148622038	rs9403969	T	G	0.08	0.14	0.1	0.27	0	0			E089,H3K27ac_Enh;E116,H3K4me1_Enh		.	Pou2f2_known2;Pou3f3;Zfp187	ENSG00000111961.12	3	69987	SASH1	279746	gene
10	93985836	rs1223581	C	T	0.71	0.62	0.78	0.52	0	0					.	Cdx2_1;Sox_9	ENSG00000138193.8	5	8152	PLCE1	302011	gene
6	60627128	rs4236161	T	G	0.98	0.86	0.94	0.83	0	0			E011,H3K4me3_Pro;E066,H3K4me3_Pro;E083,H3K4me3_Pro;E088,H3K4me3_Pro;E096,H3K4me3_Pro;E108,H3K4me3_Pro		.	Cphx;DMRT7;HMG-IY_2;Hdx;Hmx_2;Pax-4_5;STAT_known1;STAT_known2;TCF4_known1	ENSG00000146143.12	3	81499	PRIM2	332044	gene
6	60628554	rs6920754	A	T	0.99	0.85	0.94	0.83	0	0			E011,H3K4me3_Pro;E067,H3K4me3_Pro;E083,H3K4me3_Pro;E088,H3K4me3_Pro;E026,H3K9ac_Pro		.	Cdc5;Hoxa10;Pou3f2_2	ENSG00000146143.12	3	82925	PRIM2	332044	gene
6	60609246	rs4636030	T	C	1	0.86	0.94	0.85	0	0			E014,H3K4me3_Pro;E083,H3K4me3_Pro		.	ERalpha-a_known1;GR_known3;GR_known4	ENSG00000146143.12	3	63617	PRIM2	332044	gene
6	60612718	rs6459291	A	C	0.98	0.85	0.94	0.84	0	0			E047,H3K9ac_Pro;E077,H3K4me3_Pro		.	AIRE_1;Fox;Hand1_1;Nkx3_1;Pou6f1_1;TATA_known1;TATA_known3	ENSG00000146143.12	3	67089	PRIM2	332044	gene
6	60613325	rs9283922	A	G	0.99	0.85	0.94	0.84	0	0			E006,H3K9ac_Pro;E043,H3K27ac_Enh		.	Foxp1;Maf_disc2;Zfp105	ENSG00000146143.12	3	67696	PRIM2	332044	gene
6	60614160	rs7758698	T	C	0.99	0.85	0.94	0.83	0	0					.	AFP1;SIX5_disc3	ENSG00000146143.12	3	68531	PRIM2	332044	gene
6	60606249	rs5009936	C	T					0	0		E082,19_DNase	E005,H3K9ac_Pro;E014,H3K4me3_Pro;E065,H3K4me3_Pro;E083,H3K4me3_Pro;E049,H3K27ac_Enh;E065,H3K4me1_Enh;E129,H3K4me1_Enh	E081;E082	.	FAC1;Foxf2;Foxl1_1;Foxo_4;Foxp1;Mef2_known5;PLZF;Pou2f2_known6;Pou3f2_3	ENSG00000146143.12	3	60620	PRIM2	332044	gene
6	60564557	rs12206108	T	A					0	0			E011,H3K4me3_Pro;E018,H3K4me3_Pro	E093	HepG2,USF1,HudsonAlpha,None	CIZ;NERF1a	ENSG00000146143.12	3	18928	PRIM2	332044	gene
6	60524262	rs12199370	G	T					0	0			E011,H3K4me1_Enh;E017,H3K4me1_Enh;E065,H3K4me1_Enh;E087,H3K4me1_Enh;E011,H3K4me3_Pro;E079,H3K4me3_Pro		.	Foxj2_1	ENSG00000146143.12	0	0	PRIM2	332044	gene
6	60523800	rs1590354	T	G					0	0			E011,H3K4me1_Enh;E087,H3K4me1_Enh;E011,H3K4me3_Pro		.	DMRT2	ENSG00000146143.12	0	0	PRIM2	332044	gene
6	60522650	rs12195704	C	T					0	0			E011,H3K4me1_Enh;E087,H3K4me1_Enh;E011,H3K4me3_Pro		.	Hoxa5_2;Pax-4_2;Pbx-1_1;SIX5_known1;SIX5_known2	ENSG00000146143.12	0	0	PRIM2	332044	gene
6	60435358	rs12204746	A	G					0	0			E001,H3K4me3_Pro;E011,H3K4me3_Pro;E014,H3K4me3_Pro;E020,H3K27ac_Enh		.	.	ENSG00000146143.12	0	0	PRIM2	332044	gene
6	60518513	rs6937559	G	A					0	0			E011,H3K4me3_Pro;E083,H3K4me3_Pro		.	CDP_3;CDP_5;Hmx_2;Pbx-1_2;Pbx-1_4;Pbx3_known1	ENSG00000146143.12	0	0	PRIM2	332044	gene
6	57512985	rs12190422	T	C					0	0			E083,H3K4me3_Pro		.	YY1_known6;p300_disc2	ENSG00000146143.12	0	0	PRIM2	332044	gene
6	57385559	rs12201359	A	T					0	0			E017,H3K27ac_Enh;E056,H3K27ac_Enh		.	Hand1_1;PPAR_2;Pbx3_known1;YY1_known5	ENSG00000146143.12	0	0	PRIM2	332044	gene
6	60475251	rs12200158	C	T					0	0			E028,H3K4me1_Enh;E058,H3K4me1_Enh;E087,H3K4me1_Enh;E127,H3K4me1_Enh;E065,H3K4me3_Pro		.	Pou1f1_1	ENSG00000146143.12	0	0	PRIM2	332044	gene
11	115292945	rs4938195	A	G	0.13	0.11	0.09	0.1	1	1			E002,H3K4me1_Enh;E012,H3K4me1_Enh;E053,H3K4me1_Enh;E054,H3K4me1_Enh;E061,H3K4me1_Enh;E067,H3K4me1_Enh;E068,H3K4me1_Enh;E070,H3K4me1_Enh;E071,H3K4me1_Enh;E082,H3K4me1_Enh;E095,H3K4me1_Enh;E099,H3K4me1_Enh;E104,H3K4me1_Enh;E061,H3K27ac_Enh;E106,H3K4me3_Pro;E122,H3K9ac_Pro		.	Barx1;Bcl6b;Bsx;CDP_7;Dlx2;Dlx3;Hlxb9;Hoxa3_2;Hoxa5_3;Hoxb6;Hoxc6;Hoxd8	ENSG00000182985.9	0	0	CADM1	335739	gene
11	115293547	rs4938196	C	G	0.12	0.12	0.09	0.1	0	0			E012,H3K4me1_Enh;E049,H3K4me1_Enh;E054,H3K4me1_Enh;E061,H3K4me1_Enh;E068,H3K4me1_Enh;E071,H3K4me1_Enh;E082,H3K4me1_Enh;E095,H3K4me1_Enh;E099,H3K4me1_Enh;E061,H3K27ac_Enh		.	CIZ;FAC1;Irf_known10;Sox_13	ENSG00000182985.9	0	0	CADM1	335739	gene
12	24415435	rs10771087	A	G	0.37	0.28	0.65	0.2	0	0			E009,H3K4me1_Enh;E010,H3K4me1_Enh;E011,H3K4me1_Enh;E014,H3K4me1_Enh;E015,H3K4me1_Enh;E016,H3K4me1_Enh;E018,H3K4me1_Enh;E019,H3K4me1_Enh;E020,H3K4me1_Enh;E024,H3K4me1_Enh;E031,H3K4me1_Enh;E032,H3K4me1_Enh;E035,H3K4me1_Enh;E050,H3K4me1_Enh;E051,H3K4me1_Enh;E053,H3K4me1_Enh;E065,H3K4me1_Enh;E068,H3K4me1_Enh;E070,H3K4me1_Enh;E074,H3K4me1_Enh;E088,H3K4me1_Enh;E097,H3K4me1_Enh;E099,H3K4me1_Enh;E115,H3K…	E032	.	Mef2_known1;Mef2_known4;TATA_known5;TEF	ENSG00000255864.1	0	0	RP11-444D3.1	349334	no protein, long intergenic non-preotein coding RNA
12	24410943	rs11534741	G	C	0.39	0.27	0.65	0.16	0	0					.	Pbx-1_2	ENSG00000255864.1	0	0	RP11-444D3.1	349334	no protein, long intergenic non-preotein coding RNA
11	11609687	rs10765874	T	C	0.89	0.83	0.88	0.87	0	0			E005,H3K4me1_Enh;E013,H3K4me1_Enh;E014,H3K4me1_Enh;E017,H3K4me1_Enh;E021,H3K4me1_Enh;E023,H3K4me1_Enh;E025,H3K4me1_Enh;E026,H3K4me1_Enh;E027,H3K4me1_Enh;E028,H3K4me1_Enh;E049,H3K4me1_Enh;E052,H3K4me1_Enh;E055,H3K4me1_Enh;E056,H3K4me1_Enh;E057,H3K4me1_Enh;E058,H3K4me1_Enh;E059,H3K4me1_Enh;E061,H3K4me1_Enh;E063,H3K4me1_Enh;E065,H3K4me1_Enh;E067,H3K4me1_Enh;E068,H3K4me1_Enh;E069,H3K4me1_Enh;E071,H3K…		.	.	ENSG00000110328.5	0	0	GALNTL4	351129	gene
2	182290837	rs16823010	A	G	0.29	0.24	0.43	0.21	0	0			E008,H3K27ac_Enh;E023,H3K4me1_Enh;E025,H3K4me1_Enh;E073,H3K4me1_Enh;E104,H3K4me1_Enh		.	E2F_disc4;HNF1_1;Irf_disc1;NF-I_2;NF-Y_known3	ENSG00000115252.14	0	0	PDE1A	383156	gene
8	89154200	rs4961116	C	T	0.0041	0.15	0.11	0.08	0	0			E002,H3K4me3_Pro		.	PPAR_1;PPAR_3;Pax-4_3;RXRA_known1;ZEB1_known4	ENSG00000253553.1	3	417065	RP11-586K2.1	410298	no protein, long intergenic non-preotein coding RNA
18	36344918	rs1996141	T	C	0.81	0.68	0.76	0.75	0	0					.	Arid5a;Bcl6b;Elf5;Ets_known9;FEV;GATA_disc3;STAT_known3	ENSG00000134775.9	0	0	FHOD3	482341	gene
18	36345792	rs10164207	A	G	0.44	0.36	0.24	0.25	0	0					.	Foxd3;Foxj1_1;Foxj1_2;p300_disc5	ENSG00000134775.9	0	0	FHOD3	482341	gene
18	36357003	rs12966207	T	G	0.79	0.47	0.32	0.26	0	0		E121,19_DNase;E125,19_DNase	E006,H3K4me1_Enh;E025,H3K4me1_Enh;E027,H3K4me1_Enh;E055,H3K4me1_Enh;E083,H3K4me1_Enh;E105,H3K4me1_Enh;E108,H3K4me1_Enh;E129,H3K4me1_Enh;E083,H3K9ac_Pro	E120	.	Nkx2_11;Nkx2_3	ENSG00000134775.9	0	0	FHOD3	482341	gene
2	208567194	rs10210510	G	C	0.37	0.05	0.05	0.01	0	0			E042,H3K4me3_Pro;E051,H3K4me1_Enh;E084,H3K4me1_Enh;E123,H3K4me1_Enh		.	ERalpha-a_known4;Ets_known1;GR_disc1;GR_known10;PU.1_known2;Pax-5_disc3;RXRA_disc4;SPIB;Zbtb12;p300_disc10	ENSG00000144407.5	0	0	PTH2R	494789	gene
2	45953854	rs2711293	T	G	0.85	0.84	0.72	0.73	0	0			E001,H3K4me1_Enh;E005,H3K4me1_Enh;E014,H3K4me1_Enh;E027,H3K4me1_Enh;E053,H3K4me1_Enh;E070,H3K4me1_Enh;E080,H3K4me1_Enh;E087,H3K4me1_Enh;E088,H3K4me1_Enh;E092,H3K4me1_Enh;E110,H3K4me1_Enh;E117,H3K4me1_Enh;E007,H3K27ac_Enh;E063,H3K9ac_Pro	E091	HepG2,CEBPB,Stanford,None;K562,CEBPB,Stanford,None	Arid5a;CEBPA_1;CEBPB_known3;CEBPB_known5;CEBPB_known6	ENSG00000171132.9	0	0	PRKCE	536645	gene
17	65768498	rs8076925	A	C	0.71	0.51	0.78	0.37	0	0					.	Hand1_2;Nanog_disc2;Smad3_2	ENSG00000154240.12	0	0	CEP112	556546	gene
17	65768527	rs8077164	C	T	0.71	0.51	0.78	0.37	0	0					.	EBF_known3;Hoxa7_1	ENSG00000154240.12	0	0	CEP112	556546	gene
17	65768772	rs7220733	A	T	0.67	0.49	0.78	0.36	0	0					.	PLZF;p300_disc10	ENSG00000154240.12	0	0	CEP112	556546	gene
17	65770189	rs7207587	C	T	0.71	0.5	0.78	0.37	0	1			E006,H3K9ac_Pro		.	SIX5_disc4;SRF_known2	ENSG00000154240.12	0	0	CEP112	556546	gene
17	65770250	rs1421032	A	C	0.71	0.5	0.78	0.37	0	0			E006,H3K9ac_Pro		.	.	ENSG00000154240.12	0	0	CEP112	556546	gene
17	65770316	rs7211481	A	C	0.53	0.48	0.78	0.36	0	0			E006,H3K9ac_Pro		.	Sox_10;Sox_14;Sox_18;Sox_19;Sox_2;Sox_9	ENSG00000154240.12	0	0	CEP112	556546	gene
17	65770596	rs1421033	A	C	0.71	0.5	0.78	0.37	0	0			E006,H3K9ac_Pro		.	BHLHE40_known1;CIZ;HDAC2_disc6;Hoxa5_1;RBP-Jkappa_2;RXRA_disc4	ENSG00000154240.12	0	0	CEP112	556546	gene
17	65771013	rs6416948	T	G	0.71	0.5	0.78	0.37	0	0					.	.	ENSG00000154240.12	0	0	CEP112	556546	gene
17	65771101	rs6416949	A	T	0.71	0.5	0.78	0.37	0	0					.	Mef2_known1;Mef2_known3;Mef2_known4;Mef2_known6;PLZF;TATA_known1	ENSG00000154240.12	0	0	CEP112	556546	gene
17	65771474	rs2318868	G	T	0.71	0.5	0.78	0.37	0	0				E118	.	BCL_disc1;Egr-1_disc2;Ets_disc2;Ets_known1;Ets_known2;Ets_known4;Ets_known5;Ets_known7;Ets_known9;FEV;GATA_disc3;Nrf-2_1;PRDM1_known1;PU.1_disc2;PU.1_known1;Pax-5_disc4;SP1_known3;TCF12_disc6;Tel2;p300_known1	ENSG00000154240.12	0	0	CEP112	556546	gene
17	65771618	rs2318869	C	G	0.71	0.5	0.78	0.37	0	0			E011,H3K27ac_Enh		.	.	ENSG00000154240.12	0	0	CEP112	556546	gene
17	65772171	rs7218844	G	A	0.7	0.5	0.78	0.37	0	0			E011,H3K27ac_Enh;E084,H3K4me1_Enh;E101,H3K4me1_Enh;E109,H3K4me1_Enh;E110,H3K4me1_Enh;E118,H3K4me1_Enh		.	Nkx2_3	ENSG00000154240.12	0	0	CEP112	556546	gene
17	65775948	rs10512503	G	A	0.29	0.48	0.22	0.62	0	0			E002,H3K4me1_Enh;E003,H3K4me1_Enh;E005,H3K4me1_Enh;E013,H3K4me1_Enh;E015,H3K4me1_Enh;E050,H3K4me1_Enh;E055,H3K4me1_Enh;E056,H3K4me1_Enh;E061,H3K4me1_Enh;E063,H3K4me1_Enh;E083,H3K4me1_Enh;E088,H3K4me1_Enh;E091,H3K4me1_Enh;E095,H3K4me1_Enh;E104,H3K4me1_Enh;E105,H3K4me1_Enh;E112,H3K4me1_Enh;E113,H3K4me1_Enh;E125,H3K4me1_Enh;E126,H3K4me1_Enh;E003,H3K27ac_Enh;E008,H3K27ac_Enh;E013,H3K27ac_Enh;E007,H3K…	E007;E091	H1-hESC,RAD21,HudsonAlpha,None	Arid3a_2;CDP_2;Dbx1;Esx1;HNF1_3;HNF6;Hand1_1;Hmx_2;Hoxb4;Hoxb8;Hoxd8;Lhx3_1;Ncx_2;Nkx6-1_2;Nkx6-1_3;Pax-6_3;Pbx-1_1	ENSG00000154240.12	0	0	CEP112	556546	gene
17	65775973	rs10512504	C	T	0.29	0.48	0.22	0.62	0	0			E002,H3K4me1_Enh;E003,H3K4me1_Enh;E005,H3K4me1_Enh;E013,H3K4me1_Enh;E015,H3K4me1_Enh;E050,H3K4me1_Enh;E055,H3K4me1_Enh;E056,H3K4me1_Enh;E061,H3K4me1_Enh;E063,H3K4me1_Enh;E083,H3K4me1_Enh;E091,H3K4me1_Enh;E095,H3K4me1_Enh;E104,H3K4me1_Enh;E105,H3K4me1_Enh;E112,H3K4me1_Enh;E113,H3K4me1_Enh;E125,H3K4me1_Enh;E126,H3K4me1_Enh;E003,H3K27ac_Enh;E008,H3K27ac_Enh;E013,H3K27ac_Enh;E007,H3K4me3_Pro;E036,H3K…	E003;E007;E056;E091	H1-hESC,RAD21,HudsonAlpha,None	Pou3f2_1	ENSG00000154240.12	0	0	CEP112	556546	gene
17	65777004	rs11870607	A	G	0.29	0.5	0.22	0.65	0	0			E085,H3K4me1_Enh;E105,H3K4me1_Enh		A549,USF1,HudsonAlpha,EtOH_0.02pct;HepG2,USF1,HudsonAlpha,None;K562,USF1,HudsonAlpha,None;SK-N-SH_RA,USF1,HudsonAlpha,None	Foxp3;LUN-1;Pou5f1_disc1;Pou5f1_known1	ENSG00000154240.12	0	0	CEP112	556546	gene
17	65777021	rs10083855	T	C	0.29	0.5	0.22	0.65	0	0			E085,H3K4me1_Enh;E105,H3K4me1_Enh		A549,USF1,HudsonAlpha,EtOH_0.02pct;HepG2,USF1,HudsonAlpha,None;K562,USF1,HudsonAlpha,None;SK-N-SH_RA,USF1,HudsonAlpha,None	.	ENSG00000154240.12	0	0	CEP112	556546	gene
17	65777154	rs10083870	C	T	0.29	0.5	0.22	0.65	0	0			E005,H3K9ac_Pro;E007,H3K9ac_Pro;E077,H3K4me1_Enh;E085,H3K4me1_Enh;E105,H3K4me1_Enh	E021	A549,USF1,HudsonAlpha,EtOH_0.02pct;H1-hESC,USF1,HudsonAlpha,None;HepG2,USF1,HudsonAlpha,None;K562,USF1,HudsonAlpha,None;SK-N-SH_RA,USF1,HudsonAlpha,None	RXRA_known4	ENSG00000154240.12	0	0	CEP112	556546	gene
17	65777356	rs10083872	A	G	0.29	0.5	0.22	0.65	0	0			E005,H3K9ac_Pro;E007,H3K9ac_Pro;E007,H3K4me1_Enh;E077,H3K4me1_Enh;E085,H3K4me1_Enh;E105,H3K4me1_Enh;E056,H3K27ac_Enh	E109	.	AP-1_disc3;AP-1_known2;AP-1_known3;AP-2_disc1;BAF155_disc1;BATF_disc1;Bach1;Bach2;GATA_disc2;GR_disc2;HMGN3_disc1;KAP1_disc1;Myc_disc3;PRDM1_disc2;Pax-5_known4;RXRA_disc3;STAT_disc2;TCF4_disc1;p300_disc1	ENSG00000154240.12	0	0	CEP112	556546	gene
17	65777505	rs10083877	T	C	0.28	0.5	0.22	0.65	0	0			E005,H3K9ac_Pro;E007,H3K9ac_Pro;E007,H3K4me1_Enh;E077,H3K4me1_Enh;E085,H3K4me1_Enh;E056,H3K27ac_Enh		.	COMP1;Nkx2_5;Nkx2_6;Nkx3_4	ENSG00000154240.12	0	0	CEP112	556546	gene
17	65779193	rs10083837	C	G	0.29	0.5	0.22	0.65	0	0			E011,H3K4me1_Enh;E077,H3K4me1_Enh;E085,H3K4me1_Enh;E110,H3K4me1_Enh;E110,H3K9ac_Pro		.	Cdx2_2;DMRT1;DMRT2;Foxd1_2;Foxf2;Foxj1_2;Foxk1;Foxo_3;Foxq1;HNF1_7;Sox_10;Sox_14;Sox_15;Sox_16;Sox_18;Sox_19;Sox_2;Sox_7;Sox_9;Zfp105	ENSG00000154240.12	0	0	CEP112	556546	gene
17	65780578	rs10512505	T	C	0.3	0.5	0.22	0.65	1	1			E061,H3K4me1_Enh;E077,H3K4me1_Enh;E084,H3K4me1_Enh;E085,H3K4me1_Enh;E101,H3K4me1_Enh;E110,H3K4me1_Enh;E126,H3K4me1_Enh;E084,H3K27ac_Enh;E085,H3K27ac_Enh;E110,H3K9ac_Pro	E084	.	.	ENSG00000154240.12	0	0	CEP112	556546	gene
17	65788699	rs9303489	T	C	0.58	0.53	0.22	0.66	0	0			E076,H3K4me1_Enh;E078,H3K4me1_Enh;E128,H3K4me1_Enh		.	.	ENSG00000154240.12	0	0	CEP112	556546	gene
6	12765093	rs6922482	G	A	0.5	0.31	0.02	0.34	0	0			E068,H3K4me1_Enh;E106,H3K4me3_Pro		.	.	ENSG00000112137.11	0	0	PHACTR1	573679	gene
6	12770591	rs10948235	T	C	0.52	0.31	0.02	0.34	0	0			E006,H3K9ac_Pro;E007,H3K9ac_Pro;E121,H3K9ac_Pro;E007,H3K4me1_Enh;E011,H3K4me1_Enh;E024,H3K4me1_Enh;E055,H3K4me1_Enh;E056,H3K4me1_Enh;E069,H3K4me1_Enh;E070,H3K4me1_Enh;E081,H3K4me1_Enh;E082,H3K4me1_Enh;E120,H3K4me1_Enh;E055,H3K27ac_Enh;E056,H3K27ac_Enh;E067,H3K27ac_Enh;E068,H3K27ac_Enh;E072,H3K27ac_Enh		.	.	ENSG00000112137.11	0	0	PHACTR1	573679	gene
6	12782736	rs7760140	G	T	0.53	0.31	0.02	0.34	1	1			E007,H3K27ac_Enh;E008,H3K27ac_Enh;E091,H3K27ac_Enh;E081,H3K4me1_Enh;E091,H3K4me1_Enh		.	AFP1;Arid3a_2;CHX10;Dbx1;Esx1;Hlx1;Hoxb4;Hoxb8;Hoxd8;Msx-1_2;Msx2;Nkx6-1_2;Nkx6-1_3;PRDM1_known1;Pax-6_3;Pax7;Phox2a;Pou2f2_known4;Pou3f2_4;Pou4f3;Pou6f1_1	ENSG00000112137.11	0	0	PHACTR1	573679	gene
6	12784061	rs9296464	T	C	0.53	0.31	0.02	0.34	0	0			E081,H3K4me1_Enh		.	Gm397;Pou3f3	ENSG00000112137.11	0	0	PHACTR1	573679	gene
6	12786279	rs10948247	C	A	0.53	0.31	0.02	0.34	0	0			E001,H3K4me1_Enh;E016,H3K4me1_Enh;E020,H3K4me1_Enh;E054,H3K4me1_Enh;E055,H3K4me1_Enh;E061,H3K4me1_Enh;E067,H3K4me1_Enh;E068,H3K4me1_Enh;E091,H3K4me1_Enh;E121,H3K4me1_Enh;E059,H3K27ac_Enh;E061,H3K27ac_Enh;E091,H3K27ac_Enh	E059;E091	.	Hsf_known1;Nrf-2_2;Pou5f1_disc2	ENSG00000112137.11	0	0	PHACTR1	573679	gene
6	12787482	rs883947	C	T	0.53	0.31	0.02	0.34	0	0			E001,H3K4me1_Enh;E014,H3K4me1_Enh;E016,H3K4me1_Enh;E020,H3K4me1_Enh;E024,H3K4me1_Enh;E061,H3K4me1_Enh;E068,H3K4me1_Enh;E091,H3K4me1_Enh;E014,H3K27ac_Enh;E015,H3K27ac_Enh;E059,H3K27ac_Enh;E090,H3K27ac_Enh;E091,H3K27ac_Enh;E016,H3K9ac_Pro		.	.	ENSG00000112137.11	0	0	PHACTR1	573679	gene
6	12788544	rs1412752	A	T	0.53	0.32	0.02	0.34	0	0			E001,H3K4me1_Enh;E014,H3K4me1_Enh;E015,H3K4me1_Enh;E016,H3K4me1_Enh;E020,H3K4me1_Enh;E024,H3K4me1_Enh;E068,H3K4me1_Enh;E014,H3K27ac_Enh;E015,H3K27ac_Enh;E091,H3K27ac_Enh;E014,H3K9ac_Pro;E016,H3K9ac_Pro;E024,H3K4me3_Pro		.	Ets_disc1;Ik-2_3;NF-AT	ENSG00000112137.11	0	0	PHACTR1	573679	gene
6	12796823	rs4714870	T	G	0.53	0.32	0.02	0.34	0	0			E006,H3K9ac_Pro;E068,H3K9ac_Pro;E067,H3K27ac_Enh;E068,H3K27ac_Enh		.	BCL_disc1;Egr-1_disc2;Ets_disc2;Ets_known1;Ets_known3;GATA_disc3;Myf_1;PU.1_known1;Pax-5_disc4;SP1_known1;UF1H3BETA	ENSG00000112137.11	0	0	PHACTR1	573679	gene
6	12802583	rs9463134	G	C	0.52	0.32	0.02	0.34	0	0			E061,H3K4me1_Enh;E068,H3K4me1_Enh;E068,H3K27ac_Enh;E091,H3K27ac_Enh		HepG2,CEBPB,Stanford,None;K562,CEBPB,Stanford,None	Roaz_2	ENSG00000112137.11	0	0	PHACTR1	573679	gene
6	12804387	rs1953089	C	T	0.53	0.32	0.02	0.34	0	0			E013,H3K4me1_Enh;E023,H3K4me1_Enh;E036,H3K4me1_Enh;E061,H3K4me1_Enh;E068,H3K4me1_Enh;E110,H3K4me1_Enh;E120,H3K4me1_Enh;E121,H3K4me1_Enh;E125,H3K4me1_Enh;E061,H3K27ac_Enh;E068,H3K27ac_Enh;E091,H3K27ac_Enh		.	AP-2rep;CDP_6;NF-E2_disc4;Nanog_disc3;TATA_disc10	ENSG00000112137.11	0	0	PHACTR1	573679	gene
6	12777217	rs7757205	G	A	0.58	0.42	0.02	0.4	0	0			E121,H3K9ac_Pro		.	Pou2f2_known2;TATA_known1	ENSG00000112137.11	0	0	PHACTR1	573679	gene
6	12859654	rs9296494	G	A	0.33	0.69	1	0.67	0	0					.	LRH1	ENSG00000112137.11	0	0	PHACTR1	573679	gene
6	12859848	rs9395190	C	T	0.33	0.69	1	0.67	1	0					.	.	ENSG00000112137.11	0	0	PHACTR1	573679	gene
4	86314654	rs12500132	A	G	0.002	0.01	0.01	0.01	0	0			E007,H3K27ac_Enh;E012,H3K27ac_Enh;E068,H3K4me1_Enh;E069,H3K4me1_Enh;E073,H3K4me1_Enh;E081,H3K4me1_Enh;E087,H3K4me1_Enh		.	.	ENSG00000109339.14	0	0	MAPK10	579008	gene
4	86436635	rs12508579	T	C	0.02	0.0028	0.01	0.01	0	0			E003,H3K27ac_Enh;E011,H3K27ac_Enh;E024,H3K4me1_Enh;E087,H3K4me1_Enh		.	AFP1;Nkx2_3;Nkx2_6;Nkx2_8;Nkx3_1;Nkx3_4	ENSG00000109339.14	0	0	MAPK10	579008	gene
4	86590418	rs12505291	C	T	0.01	0.0028	0.01	0.01	0	0			E011,H3K4me3_Pro;E057,H3K4me1_Enh;E058,H3K4me1_Enh;E058,H3K27ac_Enh;E127,H3K27ac_Enh		.	TLX1::NFIC	ENSG00000109339.14	0	0	MAPK10	579008	gene
14	47423760	rs13379367	T	G	0.34	0.44	0.39	0.34	0	0			E003,H3K27ac_Enh;E061,H3K4me1_Enh		.	Pou2f2_known11;STAT_known14	ENSG00000139915.13	0	0	MDGA2	835325	gene
14	47434005	rs10138882	T	C	0.46	0.46	0.39	0.34	0	0			E001,H3K4me1_Enh;E010,H3K4me1_Enh;E014,H3K4me1_Enh;E015,H3K4me1_Enh;E016,H3K4me1_Enh;E018,H3K4me1_Enh;E019,H3K4me1_Enh;E020,H3K4me1_Enh;E061,H3K4me1_Enh;E014,H3K27ac_Enh;E015,H3K27ac_Enh;E019,H3K27ac_Enh;E020,H3K27ac_Enh;E020,H3K4me3_Pro		.	CEBPA_1;CEBPB_known1;CEBPB_known3;CEBPB_known6;HNF1_7;STAT_disc4	ENSG00000139915.13	0	0	MDGA2	835325	gene
14	47437279	rs10136665	A	G	0.43	0.44	0.39	0.35	0	0			E001,H3K4me1_Enh;E002,H3K4me1_Enh;E003,H3K4me1_Enh;E013,H3K4me1_Enh;E014,H3K4me1_Enh;E015,H3K4me1_Enh;E016,H3K4me1_Enh;E018,H3K4me1_Enh;E019,H3K4me1_Enh;E020,H3K4me1_Enh;E053,H3K4me1_Enh;E054,H3K4me1_Enh;E067,H3K4me1_Enh;E068,H3K4me1_Enh;E070,H3K4me1_Enh;E071,H3K4me1_Enh;E072,H3K4me1_Enh;E073,H3K4me1_Enh;E074,H3K4me1_Enh;E081,H3K4me1_Enh;E082,H3K4me1_Enh;E083,H3K4me1_Enh;E092,H3K4me1_Enh;E003,H3K…		.	.	ENSG00000139915.13	0	0	MDGA2	835325	gene
14	47446636	rs10149027	A	G	0.41	0.45	0.39	0.34	0	0			E010,H3K4me1_Enh;E068,H3K4me1_Enh		.	Foxd1_1;HDAC2_disc5;Nkx2_1	ENSG00000139915.13	0	0	MDGA2	835325	gene
9	117350771	rs10818028	G	A	0.35	0.3	0.06	0.36	0	0			E028,H3K4me3_Pro;E067,H3K4me1_Enh;E069,H3K4me1_Enh		.	.	ENSG00000148219.12	0	0	ASTN2	996814	gene
9	117357554	rs4837138	T	C	0.36	0.31	0.06	0.38	0	0			E006,H3K9ac_Pro;E019,H3K4me1_Enh		.	NRSF_disc4;ZEB1_known5	ENSG00000148219.12	0	0	ASTN2	996814	gene
9	117358994	rs10759918	A	G	0.39	0.31	0.06	0.38	0	0			E006,H3K9ac_Pro;E074,H3K4me1_Enh;E075,H3K4me1_Enh;E100,H3K4me1_Enh	E007	.	E2F_disc6;HNF1_7;Irf_known3;Mef2_known1;Mef2_known4	ENSG00000148219.12	0	0	ASTN2	996814	gene
9	117359657	rs10983635	A	T	0.36	0.31	0.06	0.38	0	0			E071,H3K4me1_Enh;E074,H3K4me1_Enh;E075,H3K4me1_Enh;E094,H3K4me1_Enh;E100,H3K4me1_Enh;E108,H3K4me1_Enh;E121,H3K4me1_Enh;E108,H3K27ac_Enh;E108,H3K4me3_Pro;E121,H3K9ac_Pro		.	TAL1_disc1	ENSG00000148219.12	0	0	ASTN2	996814	gene
20	43045825	rs2425564	T	C	0.71	0.34	0.24	0.18	0	0			E106,H3K4me3_Pro		.	DMRT1;DMRT7;Dbx2;Foxa_known2;Foxf1;Foxj1_1;Foxj2_1;Foxp1;Foxq1;Nkx6-1_3;Pou2f2_known10;Pou2f2_known2;Sox_15;Sox_19	ENSG00000196090.7	0	0	PTPRT	1117218	gene
20	43045868	rs910829	G	C	0.71	0.34	0.24	0.18	0	0			E106,H3K4me3_Pro		.	EWSR1-FLI1;RXR::LXR;RXRA_known1;TCF4_disc2;TFIIA	ENSG00000196090.7	0	0	PTPRT	1117218	gene
20	43046037	rs910830	G	A	0.71	0.34	0.24	0.18	0	0			E027,H3K4me1_Enh;E106,H3K4me3_Pro		.	MAZ;Pou3f1;ZNF263_disc1	ENSG00000196090.7	0	0	PTPRT	1117218	gene
20	43051164	rs3092568	G	C	0.75	0.42	0.37	0.21	0	0			E094,H3K4me1_Enh;E096,H3K4me3_Pro		.	.	ENSG00000196090.7	0	0	PTPRT	1117218	gene
20	43052698	rs2425572	C	T	0.75	0.41	0.36	0.21	0	0					HepG2,CJUN,Stanford,None;HepG2,JUND,Stanford,None	Pitx2	ENSG00000196090.7	0	0	PTPRT	1117218	gene
20	43030106	rs6030610	T	A	0.8	0.46	0.25	0.29	0	0			E005,H3K9ac_Pro;E083,H3K4me3_Pro		.	HDAC2_disc6;Irf_disc3;RXRA_disc4;TATA_disc7;p300_disc5	ENSG00000196090.7	0	0	PTPRT	1117218	gene
20	43030411	rs6030613	G	A	0.8	0.46	0.25	0.29	0	0			E083,H3K4me3_Pro		.	.	ENSG00000196090.7	0	0	PTPRT	1117218	gene
20	43037739	rs2425544	A	G	0.8	0.46	0.25	0.29	0	0			E028,H3K4me3_Pro;E087,H3K4me1_Enh;E094,H3K4me1_Enh;E098,H3K4me1_Enh	E098	.	NF-Y_disc1;NF-Y_known2;NRSF_known3	ENSG00000196090.7	0	0	PTPRT	1117218	gene
11	99436472	rs10501909	T	A	0.11	0.17	0.15	0.21	0	0			E080,H3K27ac_Enh;E080,H3K4me1_Enh		.	.	ENSG00000149972.6	0	0	CNTN5	1337932	gene
11	99436614	rs12280637	G	T	0.11	0.17	0.15	0.21	0	0			E080,H3K27ac_Enh		.	GATA_known10;NF-Y_known3;Nanog_disc1;Pou2f2_known2;Pou2f2_known6;Pou2f2_known7;Pou5f1_known1;TATA_disc9	ENSG00000149972.6	0	0	CNTN5	1337932	gene
11	99436685	rs10501911	G	T	0.11	0.17	0.15	0.21	0	0			E080,H3K27ac_Enh		.	Hoxb3;Hoxd10;Pou2f2_known4;Pou3f2_4;Sox_15;Sox_5;Sox_9	ENSG00000149972.6	0	0	CNTN5	1337932	gene
11	99436789	rs10893324	C	A	0.12	0.17	0.15	0.21	0	0			E080,H3K27ac_Enh		.	Foxa_known2;HDAC2_disc2	ENSG00000149972.6	0	0	CNTN5	1337932	gene
11	99438324	rs10501912	C	T	0.08	0.16	0.15	0.21	0	0					.	CCNT2_disc1;Evi-1_3;Foxa_known1;Foxa_known4;GATA_known1;GATA_known13;GATA_known2;GATA_known4;GR_disc1	ENSG00000149972.6	0	0	CNTN5	1337932	gene
11	99439854	rs11219911	T	G	0.12	0.17	0.15	0.21	0	0			E040,H3K4me3_Pro		.	Bbx;CEBPA_1;CEBPA_2;CEBPB_known1;CEBPB_known3;Elf5;HP1-site-factor;Hoxa5_1;STAT_disc4;STAT_known3	ENSG00000149972.6	0	0	CNTN5	1337932	gene
11	99440702	rs10501913	G	T	0.11	0.17	0.15	0.21	0	0			E040,H3K4me3_Pro	E086	.	CEBPA_1;HNF1_7;Pou1f1_2;TCF12_disc2	ENSG00000149972.6	0	0	CNTN5	1337932	gene
11	99451025	rs10893353	G	C	0.11	0.17	0.15	0.21	0	0			E047,H3K9ac_Pro		.	DMRT5	ENSG00000149972.6	0	0	CNTN5	1337932	gene
11	99453497	rs2656181	C	T	0.76	0.81	0.73	0.79	0	0					.	.	ENSG00000149972.6	0	0	CNTN5	1337932	gene
11	99484947	rs7123538	T	G	0.17	0.18	0.16	0.22	0	0			E047,H3K9ac_Pro		.	.	ENSG00000149972.6	0	0	CNTN5	1337932	gene
11	99490579	rs7937401	G	T	0.16	0.18	0.16	0.22	0	0			E047,H3K9ac_Pro;E067,H3K4me1_Enh;E074,H3K4me1_Enh;E069,H3K4me3_Pro	E114	.	HNF1_7;SREBP_known1;SRF_known3;p300_known1	ENSG00000149972.6	0	0	CNTN5	1337932	gene
11	99472453	rs7945901	T	C	0.19	0.19	0.18	0.22	0	0			E040,H3K4me3_Pro		.	DMRT1;YY1_disc2	ENSG00000149972.6	0	0	CNTN5	1337932	gene
11	99459735	rs10893371	A	C	0.19	0.29	0.41	0.23	0	0			E011,H3K27ac_Enh;E087,H3K4me1_Enh;E125,H3K4me1_Enh		.	HDAC2_disc6;Nanog_disc2;Pou1f1_2	ENSG00000149972.6	0	0	CNTN5	1337932	gene
11	99485976	rs10893403	C	T	0.17	0.18	0.16	0.22	0	0					.	Maf_known4;Msx-1_2;Sox_3	ENSG00000149972.6	0	0	CNTN5	1337932	gene
11	99490760	rs12290503	A	G	0.16	0.18	0.16	0.23	0	0			E047,H3K9ac_Pro;E067,H3K4me1_Enh;E073,H3K4me1_Enh;E074,H3K4me1_Enh;E069,H3K4me3_Pro;E072,H3K4me3_Pro;E073,H3K4me3_Pro		.	NRSF_disc9;Nkx2_9;Nkx3_5;Pax-5_known1	ENSG00000149972.6	0	0	CNTN5	1337932	gene
11	99458268	rs1504733	G	A	0.41	0.4	0.84	0.37	0	0			E087,H3K4me1_Enh		.	AP-1_disc8;Bbx;Cdx;Foxc1_1;Irf_known4;Nkx3_1;Pou2f2_known9;Pou3f2_3	ENSG00000149972.6	0	0	CNTN5	1337932	gene
11	99461268	rs2726391	T	C	0.38	0.58	0.16	0.63	0	0			E125,H3K4me1_Enh		.	FAC1	ENSG00000149972.6	0	0	CNTN5	1337932	gene
11	99461752	rs2656193	A	G	0.38	0.58	0.16	0.63	0	0					.	CEBPG;NF-AT1;Smad3_2;Smad_2	ENSG00000149972.6	0	0	CNTN5	1337932	gene
9	8255691	rs10733544	A	G	0.48	0.48	0.79	0.43	0	0			E011,H3K4me1_Enh;E025,H3K4me1_Enh;E052,H3K4me1_Enh;E097,H3K4me1_Enh;E129,H3K4me1_Enh;E011,H3K4me3_Pro		.	Mef2_disc1;Mef2_known2;Mef2_known5;Spdef;Whn	ENSG00000153707.10	3	58554	PTPRD	2298477	gene
6	27295862	rs3800318	A	T	0.26	0.17	0.02	0.17	0	0	E001,1_TssA;E002,1_TssA;E003,1_TssA;E004,1_TssA;E005,1_TssA;E006,2_TssAFlnk;E007,1_TssA;E008,1_TssA;E009,11_BivFlnk;E010,12_EnhBiv;E011,1_TssA;E012,10_TssBiv;E013,1_TssA;E014,10_TssBiv;E015,1_TssA;E016,10_TssBiv;E017,1_TssA;E018,10_TssBiv;E019,10_TssBiv;E020,10_TssBiv;E021,1_TssA;E022,1_TssA;E023,1_TssA;E024,1_TssA;E025,1_TssA;E026,10_TssBiv;E028,1_TssA;E033,10_TssBiv;E035,12_EnhBiv;E049,11_BivFl…	E001,1_TssA;E002,23_PromBiv;E003,23_PromBiv;E004,23_PromBiv;E005,23_PromBiv;E006,23_PromBiv;E007,23_PromBiv;E008,23_PromBiv;E009,23_PromBiv;E010,23_PromBiv;E011,23_PromBiv;E012,2_PromU;E013,23_PromBiv;E014,23_PromBiv;E015,23_PromBiv;E016,23_PromBiv;E017,23_PromBiv;E018,23_PromBiv;E019,23_PromBiv;E020,23_PromBiv;E021,1_TssA;E022,23_PromBiv;E023,23_PromBiv;E024,23_PromBiv;E025,23_PromBiv;E026,23_Pr…	E001,H3K4me3_Pro;E002,H3K4me3_Pro;E003,H3K4me3_Pro;E004,H3K4me3_Pro;E005,H3K4me3_Pro;E006,H3K4me3_Pro;E007,H3K4me3_Pro;E008,H3K4me3_Pro;E009,H3K4me3_Pro;E010,H3K4me3_Pro;E011,H3K4me3_Pro;E012,H3K4me3_Pro;E013,H3K4me3_Pro;E014,H3K4me3_Pro;E015,H3K4me3_Pro;E016,H3K4me3_Pro;E017,H3K4me3_Pro;E018,H3K4me3_Pro;E019,H3K4me3_Pro;E020,H3K4me3_Pro;E021,H3K4me3_Pro;E022,H3K4me3_Pro;E023,H3K4me3_Pro;E024,H3K…	E004;E007;E008;E021;E028;E032;E034;E057;E091;E114;E117;E121;E123	.	AP-1_disc6;Irf_known10;Zfp410	ENSG00000158553.3	0	0	POM121L2	26267	gene
6	27298161	rs13211166	T	A	0.26	0.17	0.02	0.17	0	0	E001,1_TssA;E002,1_TssA;E003,1_TssA;E004,1_TssA;E006,7_Enh;E007,1_TssA;E008,1_TssA;E011,1_TssA;E012,10_TssBiv;E013,1_TssA;E014,1_TssA;E015,1_TssA;E016,10_TssBiv;E018,1_TssA;E019,10_TssBiv;E020,10_TssBiv;E021,1_TssA;E022,1_TssA;E024,1_TssA;E026,1_TssA;E028,7_Enh;E055,2_TssAFlnk;E057,1_TssA;E058,1_TssA;E114,1_TssA;E118,7_Enh;E123,2_TssAFlnk;E127,1_TssA	E001,1_TssA;E002,1_TssA;E003,1_TssA;E004,1_TssA;E005,23_PromBiv;E007,23_PromBiv;E008,1_TssA;E009,23_PromBiv;E010,23_PromBiv;E011,23_PromBiv;E012,1_TssA;E013,23_PromBiv;E014,1_TssA;E015,1_TssA;E016,1_TssA;E017,23_PromBiv;E018,1_TssA;E019,1_TssA;E020,1_TssA;E021,22_PromP;E022,23_PromBiv;E023,22_PromP;E024,1_TssA;E026,22_PromP;E028,16_EnhW1;E037,23_PromBiv;E048,23_PromBiv;E049,22_PromP;E050,23_PromB…	E001,H3K4me3_Pro;E002,H3K4me3_Pro;E003,H3K4me3_Pro;E004,H3K4me3_Pro;E005,H3K4me3_Pro;E007,H3K4me3_Pro;E008,H3K4me3_Pro;E009,H3K4me3_Pro;E011,H3K4me3_Pro;E012,H3K4me3_Pro;E013,H3K4me3_Pro;E014,H3K4me3_Pro;E015,H3K4me3_Pro;E016,H3K4me3_Pro;E017,H3K4me3_Pro;E018,H3K4me3_Pro;E019,H3K4me3_Pro;E020,H3K4me3_Pro;E021,H3K4me3_Pro;E022,H3K4me3_Pro;E023,H3K4me3_Pro;E024,H3K4me3_Pro;E025,H3K4me3_Pro;E026,H3K…	E003;E004;E008;E021;E028;E057;E114;E117;E123	H1-hESC,USF2,Stanford,None;HeLa-S3,RPC155,Harvard,None;HeLa-S3,TFIIIC110,Harvard,None;HepG2,HSF1,Stanford,forskolin;K562,BCLAF1,HudsonAlpha,None;K562,CMYC,Stanford,IFNa30;K562,JUNB,UChicago,None;K562,POL3,Stanford,None;K562,RPC155,Harvard,None;K562,TFIIIC110,Harvard,None	NF-I_1;STAT_known13;TATA_disc7;p300_disc10	ENSG00000158553.3	0	0	POM121L2	26267	gene
6	27176104	rs13194053	T	C	0.15	0.12	0.01	0.15	0	0	E001,1_TssA;E002,1_TssA;E008,1_TssA;E015,1_TssA;E036,7_Enh;E049,1_TssA;E051,7_Enh;E055,2_TssAFlnk;E059,1_TssA;E061,7_Enh;E088,1_TssA;E089,7_Enh;E091,1_TssA;E107,1_TssA;E115,7_Enh;E117,2_TssAFlnk;E120,1_TssA;E121,2_TssAFlnk;E123,7_Enh;E128,7_Enh	E001,2_PromU;E002,22_PromP;E005,16_EnhW1;E006,22_PromP;E008,16_EnhW1;E014,22_PromP;E015,22_PromP;E016,22_PromP;E017,16_EnhW1;E018,22_PromP;E019,16_EnhW1;E020,22_PromP;E036,22_PromP;E049,22_PromP;E050,22_PromP;E052,22_PromP;E055,13_EnhA1;E056,16_EnhW1;E059,16_EnhW1;E061,19_DNase;E088,22_PromP;E089,22_PromP;E090,19_DNase;E091,13_EnhA1;E099,22_PromP;E100,19_DNase;E107,22_PromP;E108,16_EnhW1;E115,16_…	E001,H3K4me3_Pro;E002,H3K4me3_Pro;E003,H3K4me3_Pro;E008,H3K4me3_Pro;E011,H3K4me3_Pro;E012,H3K4me3_Pro;E014,H3K4me3_Pro;E015,H3K4me3_Pro;E016,H3K4me3_Pro;E018,H3K4me3_Pro;E019,H3K4me3_Pro;E020,H3K4me3_Pro;E024,H3K4me3_Pro;E027,H3K4me3_Pro;E035,H3K4me3_Pro;E040,H3K4me3_Pro;E050,H3K4me3_Pro;E051,H3K4me3_Pro;E052,H3K4me3_Pro;E054,H3K4me3_Pro;E055,H3K4me3_Pro;E056,H3K4me3_Pro;E058,H3K4me3_Pro;E059,H3K…	E059;E083;E091;E121	.	DMRT4;SIX5_disc1;YY1_known2;Znf143_disc2	ENSG00000265565.1	3	28415	MIR3143	63	microRNA
6	27293545	rs7746199	C	T	0.26	0.17	0.02	0.16	0	0	E001,1_TssA;E002,11_BivFlnk;E003,2_TssAFlnk;E004,2_TssAFlnk;E008,2_TssAFlnk;E011,1_TssA;E012,10_TssBiv;E014,1_TssA;E015,10_TssBiv;E016,10_TssBiv;E018,10_TssBiv;E019,11_BivFlnk;E020,10_TssBiv;E021,1_TssA;E022,1_TssA;E028,7_Enh;E055,2_TssAFlnk;E057,1_TssA;E058,1_TssA;E114,1_TssA;E118,11_BivFlnk;E119,1_TssA;E127,1_TssA;E129,1_TssA	E001,2_PromU;E002,23_PromBiv;E003,23_PromBiv;E004,23_PromBiv;E005,23_PromBiv;E007,23_PromBiv;E008,23_PromBiv;E009,23_PromBiv;E010,23_PromBiv;E011,23_PromBiv;E012,23_PromBiv;E013,23_PromBiv;E014,23_PromBiv;E015,23_PromBiv;E016,23_PromBiv;E017,22_PromP;E018,23_PromBiv;E019,23_PromBiv;E020,23_PromBiv;E021,23_PromBiv;E022,22_PromP;E023,23_PromBiv;E024,23_PromBiv;E025,23_PromBiv;E026,23_PromBiv;E027,2…	E001,H3K4me3_Pro;E002,H3K4me3_Pro;E003,H3K4me3_Pro;E004,H3K4me3_Pro;E008,H3K4me3_Pro;E011,H3K4me3_Pro;E012,H3K4me3_Pro;E013,H3K4me3_Pro;E014,H3K4me3_Pro;E015,H3K4me3_Pro;E016,H3K4me3_Pro;E017,H3K4me3_Pro;E018,H3K4me3_Pro;E019,H3K4me3_Pro;E020,H3K4me3_Pro;E021,H3K4me3_Pro;E023,H3K4me3_Pro;E025,H3K4me3_Pro;E026,H3K4me3_Pro;E028,H3K4me3_Pro;E052,H3K4me3_Pro;E055,H3K4me3_Pro;E056,H3K4me3_Pro;E057,H3K…	E007;E028;E032;E057;E127	.	CHD2_disc2	ENSG00000158553.3	0	0	POM121L2	26267	gene
6	57520264	rs12213707	G	A					0	0	E001,2_TssAFlnk;E002,2_TssAFlnk;E003,2_TssAFlnk;E008,7_Enh;E014,2_TssAFlnk;E015,2_TssAFlnk;E016,2_TssAFlnk;E018,2_TssAFlnk;E019,7_Enh;E020,2_TssAFlnk;E024,7_Enh;E052,7_Enh	E001,13_EnhA1;E002,14_EnhA2;E003,13_EnhA1;E004,15_EnhAF;E008,14_EnhA2;E010,15_EnhAF;E011,15_EnhAF;E012,15_EnhAF;E014,13_EnhA1;E015,13_EnhA1;E016,13_EnhA1;E018,14_EnhA2;E019,14_EnhA2;E020,13_EnhA1;E021,15_EnhAF;E022,15_EnhAF;E024,15_EnhAF;E052,19_DNase;E055,19_DNase;E056,19_DNase;E059,19_DNase;E128,19_DNase	E001,H3K4me1_Enh;E002,H3K4me1_Enh;E003,H3K4me1_Enh;E004,H3K4me1_Enh;E008,H3K4me1_Enh;E012,H3K4me1_Enh;E014,H3K4me1_Enh;E015,H3K4me1_Enh;E016,H3K4me1_Enh;E018,H3K4me1_Enh;E019,H3K4me1_Enh;E020,H3K4me1_Enh;E021,H3K4me1_Enh;E024,H3K4me1_Enh;E052,H3K4me1_Enh;E128,H3K4me1_Enh;E129,H3K4me1_Enh;E001,H3K4me3_Pro;E002,H3K4me3_Pro;E003,H3K4me3_Pro;E008,H3K4me3_Pro;E012,H3K4me3_Pro;E014,H3K4me3_Pro;E015,H3K…	E008;E021	.	TEF-1_2	ENSG00000146143.12	0	0	PRIM2	332044	gene
6	60669513	rs6459297	A	G	0.99	0.84	0.93	0.81	0	0	E001,7_Enh	E001,17_EnhW2	E001,H3K4me1_Enh;E004,H3K4me1_Enh;E008,H3K4me1_Enh;E018,H3K4me1_Enh;E001,H3K4me3_Pro;E015,H3K4me3_Pro;E019,H3K4me3_Pro;E041,H3K4me3_Pro;E063,H3K4me3_Pro;E083,H3K4me3_Pro;E088,H3K4me3_Pro;E003,H3K27ac_Enh;E004,H3K27ac_Enh;E020,H3K27ac_Enh;E021,H3K27ac_Enh;E043,H3K27ac_Enh;E020,H3K9ac_Pro		.	EWSR1-FLI1;HDAC2_disc6;SIX5_disc3;TEF-1_2	ENSG00000231273.1	5	53634	RP11-343D24.2	750	no protein, long intergenic non-preotein coding RNA
11	99459045	rs6590141	T	G	0.14	0.18	0.16	0.22	0	0	E001,7_Enh		E001,H3K4me1_Enh;E087,H3K4me1_Enh;E125,H3K4me1_Enh		.	IRC900814	ENSG00000149972.6	0	0	CNTN5	1337932	gene
6	57489995	rs6908145	T	C	0.01	0.16	0.05	0.16	0	0	E001,7_Enh;E002,7_Enh;E003,7_Enh;E004,7_Enh;E006,7_Enh;E008,7_Enh;E012,7_Enh;E014,7_Enh;E015,7_Enh;E016,7_Enh;E017,7_Enh;E018,7_Enh;E019,7_Enh;E020,7_Enh;E021,7_Enh;E022,7_Enh;E024,7_Enh;E049,7_Enh;E112,7_Enh	E001,14_EnhA2;E002,17_EnhW2;E003,17_EnhW2;E004,14_EnhA2;E007,17_EnhW2;E008,14_EnhA2;E009,17_EnhW2;E011,17_EnhW2;E012,16_EnhW1;E014,14_EnhA2;E015,14_EnhA2;E016,14_EnhA2;E018,14_EnhA2;E019,14_EnhA2;E020,16_EnhW1;E021,15_EnhAF;E022,17_EnhW2;E024,14_EnhA2	E001,H3K4me1_Enh;E002,H3K4me1_Enh;E003,H3K4me1_Enh;E004,H3K4me1_Enh;E007,H3K4me1_Enh;E008,H3K4me1_Enh;E011,H3K4me1_Enh;E012,H3K4me1_Enh;E013,H3K4me1_Enh;E014,H3K4me1_Enh;E015,H3K4me1_Enh;E016,H3K4me1_Enh;E018,H3K4me1_Enh;E019,H3K4me1_Enh;E020,H3K4me1_Enh;E021,H3K4me1_Enh;E023,H3K4me1_Enh;E024,H3K4me1_Enh;E025,H3K4me1_Enh;E049,H3K4me1_Enh;E079,H3K4me1_Enh;E127,H3K4me1_Enh;E129,H3K4me1_Enh;E001,H3K…	E003;E004;E008;E021;E034;E091	.	HNF1_5;PPAR_1;Sox_17	ENSG00000146143.12	0	0	PRIM2	332044	gene
6	60570656	rs2498197	A	C,T					1	0	E001,7_Enh;E002,7_Enh;E003,7_Enh;E004,7_Enh;E008,7_Enh;E009,7_Enh;E010,2_TssAFlnk;E011,7_Enh;E014,7_Enh;E015,7_Enh;E018,7_Enh;E020,7_Enh;E023,7_Enh;E024,7_Enh;E025,2_TssAFlnk;E026,7_Enh;E027,7_Enh;E049,7_Enh;E126,7_Enh;E129,7_Enh	E001,14_EnhA2;E002,15_EnhAF;E003,15_EnhAF;E004,15_EnhAF;E008,15_EnhAF;E009,17_EnhW2;E010,14_EnhA2;E011,15_EnhAF;E012,17_EnhW2;E013,18_EnhAc;E014,13_EnhA1;E015,15_EnhAF;E016,13_EnhA1;E018,14_EnhA2;E019,15_EnhAF;E020,13_EnhA1;E021,17_EnhW2;E022,17_EnhW2;E023,14_EnhA2;E024,15_EnhAF;E025,13_EnhA1;E026,13_EnhA1;E049,15_EnhAF;E052,15_EnhAF;E083,17_EnhW2;E120,18_EnhAc;E121,18_EnhAc;E122,18_EnhAc;E125,18…	E001,H3K4me1_Enh;E002,H3K4me1_Enh;E003,H3K4me1_Enh;E004,H3K4me1_Enh;E007,H3K4me1_Enh;E008,H3K4me1_Enh;E009,H3K4me1_Enh;E010,H3K4me1_Enh;E011,H3K4me1_Enh;E012,H3K4me1_Enh;E014,H3K4me1_Enh;E015,H3K4me1_Enh;E016,H3K4me1_Enh;E018,H3K4me1_Enh;E019,H3K4me1_Enh;E020,H3K4me1_Enh;E021,H3K4me1_Enh;E023,H3K4me1_Enh;E024,H3K4me1_Enh;E025,H3K4me1_Enh;E026,H3K4me1_Enh;E049,H3K4me1_Enh;E052,H3K4me1_Enh;E065,H3K…	E008;E100;E125;E128	H1-hESC,RAD21,Stanford,None	.	ENSG00000146143.12	3	25027	PRIM2	332044	gene
6	60366221	rs12201331	C	T					0	0	E001,7_Enh;E002,7_Enh;E003,7_Enh;E004,7_Enh;E008,7_Enh;E010,7_Enh;E011,7_Enh;E012,7_Enh;E014,7_Enh;E015,7_Enh;E016,7_Enh;E017,7_Enh;E018,7_Enh;E019,7_Enh;E020,7_Enh;E023,7_Enh;E024,7_Enh;E025,7_Enh;E026,7_Enh;E027,7_Enh;E049,2_TssAFlnk;E052,2_TssAFlnk;E053,7_Enh;E054,7_Enh;E061,7_Enh;E063,7_Enh;E070,7_Enh;E071,7_Enh;E074,7_Enh;E076,7_Enh;E083,7_Enh;E086,7_Enh;E088,7_Enh;E092,7_Enh;E097,7_Enh;E103…	E001,14_EnhA2;E002,17_EnhW2;E003,15_EnhAF;E004,16_EnhW1;E005,18_EnhAc;E006,17_EnhW2;E007,19_DNase;E008,15_EnhAF;E009,17_EnhW2;E010,17_EnhW2;E011,14_EnhA2;E012,14_EnhA2;E013,15_EnhAF;E014,14_EnhA2;E015,15_EnhAF;E016,14_EnhA2;E017,15_EnhAF;E018,14_EnhA2;E019,14_EnhA2;E020,14_EnhA2;E021,17_EnhW2;E022,18_EnhAc;E023,13_EnhA1;E024,17_EnhW2;E025,14_EnhA2;E026,13_EnhA1;E027,19_DNase;E028,19_DNase;E034,19…	E001,H3K4me1_Enh;E002,H3K4me1_Enh;E003,H3K4me1_Enh;E004,H3K4me1_Enh;E007,H3K4me1_Enh;E008,H3K4me1_Enh;E010,H3K4me1_Enh;E011,H3K4me1_Enh;E012,H3K4me1_Enh;E013,H3K4me1_Enh;E014,H3K4me1_Enh;E015,H3K4me1_Enh;E016,H3K4me1_Enh;E017,H3K4me1_Enh;E018,H3K4me1_Enh;E019,H3K4me1_Enh;E020,H3K4me1_Enh;E021,H3K4me1_Enh;E023,H3K4me1_Enh;E024,H3K4me1_Enh;E025,H3K4me1_Enh;E026,H3K4me1_Enh;E027,H3K4me1_Enh;E049,H3K…	E004;E006;E008;E017;E021;E055;E056;E057;E059;E084;E086;E088;E089;E090;E091;E092;E098;E100;E117;E120;E121;E122;E125;E126;E128	HUVEC,GATA2,UCD,None;SH-SY5Y,GATA2,UCD,None	AP-1_disc10	ENSG00000146143.12	0	0	PRIM2	332044	gene
22	44755574	rs3788618	C	T	0.08	0.44	0.48	0.53	0	0	E001,7_Enh;E002,7_Enh;E003,7_Enh;E005,7_Enh;E008,7_Enh;E011,7_Enh;E014,7_Enh;E015,2_TssAFlnk;E016,7_Enh;E018,7_Enh;E019,7_Enh;E020,2_TssAFlnk;E021,7_Enh;E022,2_TssAFlnk;E024,7_Enh;E027,7_Enh;E028,7_Enh;E057,7_Enh;E058,7_Enh;E075,7_Enh;E077,2_TssAFlnk;E079,7_Enh;E080,12_EnhBiv;E084,7_Enh;E085,7_Enh;E086,7_Enh;E088,7_Enh;E089,12_EnhBiv;E090,12_EnhBiv;E091,12_EnhBiv;E092,12_EnhBiv;E094,7_Enh;E098,7_…	E001,9_TxReg;E002,17_EnhW2;E003,14_EnhA2;E004,14_EnhA2;E005,13_EnhA1;E007,23_PromBiv;E008,15_EnhAF;E011,17_EnhW2;E012,16_EnhW1;E014,13_EnhA1;E015,13_EnhA1;E016,14_EnhA2;E018,9_TxReg;E019,15_EnhAF;E020,13_EnhA1;E021,15_EnhAF;E022,14_EnhA2;E024,9_TxReg;E027,4_PromD2;E028,14_EnhA2;E057,4_PromD2;E058,10_TxEnh5;E075,14_EnhA2;E077,13_EnhA1;E078,23_PromBiv;E079,14_EnhA2;E080,23_PromBiv;E081,23_PromBiv;E…	E001,H3K4me1_Enh;E002,H3K4me1_Enh;E003,H3K4me1_Enh;E004,H3K4me1_Enh;E005,H3K4me1_Enh;E006,H3K4me1_Enh;E007,H3K4me1_Enh;E008,H3K4me1_Enh;E011,H3K4me1_Enh;E012,H3K4me1_Enh;E013,H3K4me1_Enh;E014,H3K4me1_Enh;E015,H3K4me1_Enh;E016,H3K4me1_Enh;E017,H3K4me1_Enh;E018,H3K4me1_Enh;E019,H3K4me1_Enh;E020,H3K4me1_Enh;E021,H3K4me1_Enh;E022,H3K4me1_Enh;E023,H3K4me1_Enh;E024,H3K4me1_Enh;E025,H3K4me1_Enh;E026,H3K…	E004;E022;E084;E086;E088;E091;E093;E109;E121;E126	.	ERalpha-a_disc4;NRSF_disc9;Pax-5_disc5;Pou2f2_disc2;RXRA_disc5;Sin3Ak-20_disc6;p300_disc9	ENSG00000248405.5	0	0	PRR5-ARHGAP8	160473	gene
6	100420133	rs3778035	T	C	0.01	0.12	0.21	0.08	0	0	E001,7_Enh;E002,7_Enh;E003,7_Enh;E008,7_Enh;E012,7_Enh;E014,7_Enh;E015,7_Enh;E016,7_Enh;E018,7_Enh;E019,7_Enh;E020,7_Enh;E024,7_Enh	E001,15_EnhAF;E002,17_EnhW2;E003,17_EnhW2;E004,17_EnhW2;E007,17_EnhW2;E008,17_EnhW2;E011,17_EnhW2;E012,17_EnhW2;E014,15_EnhAF;E015,17_EnhW2;E016,15_EnhAF;E018,15_EnhAF;E019,14_EnhA2;E020,14_EnhA2;E022,17_EnhW2	E001,H3K4me1_Enh;E002,H3K4me1_Enh;E003,H3K4me1_Enh;E007,H3K4me1_Enh;E008,H3K4me1_Enh;E009,H3K4me1_Enh;E011,H3K4me1_Enh;E012,H3K4me1_Enh;E014,H3K4me1_Enh;E015,H3K4me1_Enh;E016,H3K4me1_Enh;E018,H3K4me1_Enh;E019,H3K4me1_Enh;E020,H3K4me1_Enh;E024,H3K4me1_Enh;E055,H3K4me1_Enh;E087,H3K4me1_Enh;E003,H3K27ac_Enh;E004,H3K27ac_Enh;E014,H3K27ac_Enh;E016,H3K27ac_Enh;E019,H3K27ac_Enh;E020,H3K27ac_Enh;E022,H3K…		.	AFP1;Foxq1;Hmbox1;Rad21_disc9	ENSG00000112246.5	0	0	SIM1	79914	gene
6	30768764	rs11964596	G	A	0.16	0.06	0.06	0.03	0	0	E001,7_Enh;E002,7_Enh;E004,7_Enh;E005,7_Enh;E006,7_Enh;E007,7_Enh;E010,7_Enh;E013,7_Enh;E015,7_Enh;E017,7_Enh;E019,7_Enh;E024,7_Enh;E026,7_Enh;E027,7_Enh;E028,7_Enh;E029,7_Enh;E030,7_Enh;E031,7_Enh;E033,7_Enh;E034,7_Enh;E035,7_Enh;E036,7_Enh;E037,7_Enh;E038,7_Enh;E039,2_TssAFlnk;E040,7_Enh;E041,2_TssAFlnk;E042,7_Enh;E043,7_Enh;E044,7_Enh;E045,7_Enh;E046,7_Enh;E047,7_Enh;E048,7_Enh;E050,12_EnhBiv;…	E001,13_EnhA1;E002,17_EnhW2;E003,17_EnhW2;E004,13_EnhA1;E005,13_EnhA1;E006,15_EnhAF;E007,15_EnhAF;E008,17_EnhW2;E009,17_EnhW2;E010,17_EnhW2;E011,15_EnhAF;E012,15_EnhAF;E013,13_EnhA1;E014,15_EnhAF;E015,14_EnhA2;E016,15_EnhAF;E017,13_EnhA1;E018,15_EnhAF;E019,15_EnhAF;E020,15_EnhAF;E021,17_EnhW2;E022,15_EnhAF;E023,15_EnhAF;E024,17_EnhW2;E025,13_EnhA1;E026,13_EnhA1;E027,13_EnhA1;E028,13_EnhA1;E029,14…	E001,H3K4me1_Enh;E002,H3K4me1_Enh;E003,H3K4me1_Enh;E004,H3K4me1_Enh;E005,H3K4me1_Enh;E006,H3K4me1_Enh;E007,H3K4me1_Enh;E008,H3K4me1_Enh;E009,H3K4me1_Enh;E010,H3K4me1_Enh;E011,H3K4me1_Enh;E012,H3K4me1_Enh;E013,H3K4me1_Enh;E014,H3K4me1_Enh;E015,H3K4me1_Enh;E016,H3K4me1_Enh;E017,H3K4me1_Enh;E018,H3K4me1_Enh;E019,H3K4me1_Enh;E020,H3K4me1_Enh;E021,H3K4me1_Enh;E022,H3K4me1_Enh;E023,H3K4me1_Enh;E024,H3K…	E004;E005;E022;E057;E127;E128	.	CTCF_disc8;E2A_3;LRH1;Myc_disc10;NF-kappaB_disc2;NRSF_disc9	ENSG00000228022.1	0	0	HCG20	25425	gene
11	88103616	rs490589	A	G	0.88	0.67	0.67	0.63	0	0	E001,7_Enh;E002,7_Enh;E008,7_Enh;E011,7_Enh;E014,7_Enh;E015,7_Enh;E016,7_Enh;E018,7_Enh;E019,7_Enh;E020,7_Enh;E023,7_Enh;E024,7_Enh;E028,7_Enh;E057,7_Enh;E058,7_Enh;E061,6_EnhG;E066,7_Enh;E077,7_Enh;E084,7_Enh;E101,7_Enh;E110,7_Enh;E114,2_TssAFlnk;E119,7_Enh;E127,7_Enh	E001,14_EnhA2;E002,16_EnhW1;E003,19_DNase;E004,17_EnhW2;E008,19_DNase;E011,16_EnhW1;E012,19_DNase;E013,19_DNase;E014,17_EnhW2;E015,15_EnhAF;E016,16_EnhW1;E018,16_EnhW1;E019,15_EnhAF;E020,17_EnhW2;E023,19_DNase;E024,19_DNase;E025,19_DNase;E027,19_DNase;E028,14_EnhA2;E030,19_DNase;E057,15_EnhAF;E058,14_EnhA2;E059,14_EnhA2;E061,14_EnhA2;E062,19_DNase;E066,22_PromP;E077,17_EnhW2;E083,17_EnhW2;E084,17…	E001,H3K4me1_Enh;E002,H3K4me1_Enh;E006,H3K4me1_Enh;E007,H3K4me1_Enh;E008,H3K4me1_Enh;E011,H3K4me1_Enh;E013,H3K4me1_Enh;E014,H3K4me1_Enh;E015,H3K4me1_Enh;E016,H3K4me1_Enh;E018,H3K4me1_Enh;E019,H3K4me1_Enh;E020,H3K4me1_Enh;E023,H3K4me1_Enh;E024,H3K4me1_Enh;E025,H3K4me1_Enh;E028,H3K4me1_Enh;E029,H3K4me1_Enh;E057,H3K4me1_Enh;E058,H3K4me1_Enh;E059,H3K4me1_Enh;E061,H3K4me1_Enh;E063,H3K4me1_Enh;E066,H3K…	E003;E004;E007;E008;E021;E022;E057;E059;E085;E114;E119	H1-hESC,USF1,HudsonAlpha,None;U2OS,SETDB1,UCD,None	Pou1f1_2;Pou2f2_known6;Pou3f2_3;Pou5f1_disc1;Pou5f1_known1;Sox_4;Sox_5	ENSG00000255241.1	0	0	RP11-164N3.3	17244	no protein, long intergenic non-preotein coding RNA
6	60572975	rs2498205	C	A					0	0	E001,7_Enh;E002,7_Enh;E010,7_Enh;E020,7_Enh;E023,7_Enh;E025,7_Enh;E026,7_Enh;E049,7_Enh;E129,7_Enh	E001,19_DNase;E003,19_DNase;E007,19_DNase;E010,19_DNase;E012,19_DNase;E015,19_DNase;E016,19_DNase;E019,19_DNase;E021,19_DNase;E023,17_EnhW2;E024,19_DNase;E025,17_EnhW2;E026,19_DNase	E001,H3K4me1_Enh;E002,H3K4me1_Enh;E009,H3K4me1_Enh;E010,H3K4me1_Enh;E014,H3K4me1_Enh;E015,H3K4me1_Enh;E016,H3K4me1_Enh;E018,H3K4me1_Enh;E019,H3K4me1_Enh;E020,H3K4me1_Enh;E023,H3K4me1_Enh;E024,H3K4me1_Enh;E025,H3K4me1_Enh;E026,H3K4me1_Enh;E049,H3K4me1_Enh;E065,H3K4me1_Enh;E129,H3K4me1_Enh;E003,H3K27ac_Enh;E008,H3K27ac_Enh;E056,H3K27ac_Enh;E023,H3K9ac_Pro;E025,H3K9ac_Pro;E025,H3K4me3_Pro;E094,H3K4m…	E003;E004;E007;E008;E022;E121	GM06990,CTCF,UW,None;HeLa-S3,CTCF,Broad,None;K562,CTCF,Broad,None	GATA_known8;GR_known2;Sox_10;Sox_13;Sox_16;Sox_2;TCF4_known1;TCF4_known3	ENSG00000146143.12	3	27346	PRIM2	332044	gene
6	27168446	rs13219181	A	G	0.15	0.12	0.01	0.15	0	0	E001,7_Enh;E002,7_Enh;E013,7_Enh;E023,7_Enh;E025,7_Enh;E026,7_Enh;E028,7_Enh;E049,7_Enh;E052,2_TssAFlnk;E055,1_TssA;E058,7_Enh;E114,7_Enh;E117,7_Enh;E119,7_Enh;E120,7_Enh;E121,7_Enh;E122,7_Enh;E123,7_Enh;E125,7_Enh;E126,7_Enh;E127,7_Enh;E128,7_Enh;E129,2_TssAFlnk	E001,16_EnhW1;E006,17_EnhW2;E013,14_EnhA2;E017,13_EnhA1;E023,14_EnhA2;E025,13_EnhA1;E026,13_EnhA1;E028,14_EnhA2;E049,14_EnhA2;E052,2_PromU;E055,13_EnhA1;E056,14_EnhA2;E057,16_EnhW1;E058,14_EnhA2;E059,19_DNase;E061,19_DNase;E065,19_DNase;E097,19_DNase;E099,19_DNase;E114,15_EnhAF;E117,18_EnhAc;E119,14_EnhA2;E120,14_EnhA2;E121,13_EnhA1;E122,14_EnhA2;E123,16_EnhW1;E125,2_PromU;E126,14_EnhA2;E127,14_E…	E001,H3K4me1_Enh;E002,H3K4me1_Enh;E011,H3K4me1_Enh;E013,H3K4me1_Enh;E014,H3K4me1_Enh;E015,H3K4me1_Enh;E016,H3K4me1_Enh;E023,H3K4me1_Enh;E025,H3K4me1_Enh;E026,H3K4me1_Enh;E028,H3K4me1_Enh;E049,H3K4me1_Enh;E052,H3K4me1_Enh;E055,H3K4me1_Enh;E056,H3K4me1_Enh;E057,H3K4me1_Enh;E058,H3K4me1_Enh;E114,H3K4me1_Enh;E117,H3K4me1_Enh;E119,H3K4me1_Enh;E120,H3K4me1_Enh;E121,H3K4me1_Enh;E122,H3K4me1_Enh;E123,H3K…	E006;E017;E055;E056;E123	HepG2,CJUN,Stanford,None;HepG2,JUND,Stanford,None	AP-1_disc8;E4F1;FXR_3	ENSG00000265565.1	3	20757	MIR3143	63	microRNA
18	36331906	rs2670669	A	G	0.81	0.68	0.76	0.76	0	0	E001,7_Enh;E003,7_Enh;E005,7_Enh;E006,7_Enh;E007,7_Enh;E008,7_Enh;E012,7_Enh;E014,7_Enh;E015,7_Enh;E017,7_Enh;E019,7_Enh;E020,7_Enh;E021,7_Enh;E022,7_Enh;E025,7_Enh;E027,7_Enh;E077,7_Enh;E083,7_Enh;E088,7_Enh;E089,7_Enh;E092,7_Enh;E095,7_Enh;E098,7_Enh;E100,7_Enh;E101,7_Enh;E102,7_Enh;E104,7_Enh;E105,7_Enh;E107,7_Enh;E108,7_Enh;E116,7_Enh;E121,7_Enh	E001,17_EnhW2;E002,17_EnhW2;E003,17_EnhW2;E004,17_EnhW2;E005,14_EnhA2;E006,10_TxEnh5;E007,17_EnhW2;E008,17_EnhW2;E009,17_EnhW2;E010,17_EnhW2;E011,17_EnhW2;E012,15_EnhAF;E013,17_EnhW2;E014,17_EnhW2;E015,17_EnhW2;E016,17_EnhW2;E018,17_EnhW2;E019,15_EnhAF;E020,17_EnhW2;E021,17_EnhW2;E022,15_EnhAF;E023,17_EnhW2;E024,17_EnhW2;E053,17_EnhW2;E056,17_EnhW2;E063,17_EnhW2;E075,15_EnhAF;E076,17_EnhW2;E077,1…	E001,H3K4me1_Enh;E002,H3K4me1_Enh;E003,H3K4me1_Enh;E005,H3K4me1_Enh;E006,H3K4me1_Enh;E007,H3K4me1_Enh;E008,H3K4me1_Enh;E009,H3K4me1_Enh;E011,H3K4me1_Enh;E012,H3K4me1_Enh;E013,H3K4me1_Enh;E014,H3K4me1_Enh;E015,H3K4me1_Enh;E016,H3K4me1_Enh;E017,H3K4me1_Enh;E018,H3K4me1_Enh;E019,H3K4me1_Enh;E020,H3K4me1_Enh;E021,H3K4me1_Enh;E022,H3K4me1_Enh;E024,H3K4me1_Enh;E025,H3K4me1_Enh;E026,H3K4me1_Enh;E027,H3K…	E086	.	Egr-1_known2;Pou3f4;Sp4	ENSG00000134775.9	0	0	FHOD3	482341	gene
17	65774889	rs9972942	A	G	0.29	0.49	0.22	0.63	0	0	E001,7_Enh;E003,7_Enh;E006,7_Enh;E007,7_Enh;E009,7_Enh;E012,7_Enh;E013,7_Enh;E015,7_Enh;E018,7_Enh;E022,7_Enh;E033,7_Enh;E036,7_Enh;E039,7_Enh;E047,7_Enh;E049,7_Enh;E050,7_Enh;E051,2_TssAFlnk;E053,7_Enh;E054,7_Enh;E061,7_Enh;E077,7_Enh;E083,7_Enh;E086,7_Enh;E088,7_Enh;E089,7_Enh;E091,7_Enh;E092,7_Enh;E093,7_Enh;E095,7_Enh;E096,7_Enh;E105,7_Enh;E110,7_Enh;E112,7_Enh;E115,7_Enh;E118,7_Enh;E122,7_En…	E001,17_EnhW2;E002,17_EnhW2;E003,16_EnhW1;E004,17_EnhW2;E006,19_DNase;E007,16_EnhW1;E008,17_EnhW2;E009,17_EnhW2;E010,17_EnhW2;E011,17_EnhW2;E012,15_EnhAF;E013,16_EnhW1;E014,19_DNase;E015,19_DNase;E016,19_DNase;E018,16_EnhW1;E019,17_EnhW2;E020,19_DNase;E022,17_EnhW2;E024,17_EnhW2;E029,17_EnhW2;E030,17_EnhW2;E031,17_EnhW2;E033,16_EnhW1;E034,17_EnhW2;E035,17_EnhW2;E036,16_EnhW1;E037,16_EnhW1;E038,16…	E001,H3K4me1_Enh;E003,H3K4me1_Enh;E005,H3K4me1_Enh;E006,H3K4me1_Enh;E007,H3K4me1_Enh;E009,H3K4me1_Enh;E010,H3K4me1_Enh;E011,H3K4me1_Enh;E012,H3K4me1_Enh;E013,H3K4me1_Enh;E015,H3K4me1_Enh;E018,H3K4me1_Enh;E022,H3K4me1_Enh;E024,H3K4me1_Enh;E033,H3K4me1_Enh;E034,H3K4me1_Enh;E036,H3K4me1_Enh;E038,H3K4me1_Enh;E039,H3K4me1_Enh;E041,H3K4me1_Enh;E046,H3K4me1_Enh;E047,H3K4me1_Enh;E049,H3K4me1_Enh;E050,H3K…	E004;E029;E050;E059;E080;E081;E082;E083;E086;E088;E091;E093;E122	.	Ets_known1;NERF1a;VDR_3	ENSG00000154240.12	0	0	CEP112	556546	gene
17	65774932	rs9972954	T	C	0.29	0.47	0.22	0.61	0	0	E001,7_Enh;E003,7_Enh;E006,7_Enh;E007,7_Enh;E009,7_Enh;E012,7_Enh;E013,7_Enh;E015,7_Enh;E018,7_Enh;E022,7_Enh;E033,7_Enh;E036,7_Enh;E039,7_Enh;E047,7_Enh;E049,7_Enh;E050,7_Enh;E051,2_TssAFlnk;E053,7_Enh;E054,7_Enh;E061,7_Enh;E077,7_Enh;E083,7_Enh;E086,7_Enh;E088,7_Enh;E089,7_Enh;E091,7_Enh;E092,7_Enh;E093,7_Enh;E095,7_Enh;E096,7_Enh;E105,7_Enh;E110,7_Enh;E112,7_Enh;E115,7_Enh;E118,7_Enh;E122,7_En…	E001,17_EnhW2;E002,17_EnhW2;E003,16_EnhW1;E004,17_EnhW2;E006,19_DNase;E007,16_EnhW1;E008,17_EnhW2;E009,17_EnhW2;E010,17_EnhW2;E011,17_EnhW2;E012,15_EnhAF;E013,16_EnhW1;E014,19_DNase;E015,19_DNase;E016,19_DNase;E018,16_EnhW1;E019,17_EnhW2;E020,19_DNase;E022,17_EnhW2;E024,17_EnhW2;E029,17_EnhW2;E030,17_EnhW2;E031,17_EnhW2;E033,16_EnhW1;E034,17_EnhW2;E035,17_EnhW2;E036,16_EnhW1;E037,16_EnhW1;E038,16…	E001,H3K4me1_Enh;E003,H3K4me1_Enh;E005,H3K4me1_Enh;E006,H3K4me1_Enh;E007,H3K4me1_Enh;E009,H3K4me1_Enh;E010,H3K4me1_Enh;E011,H3K4me1_Enh;E012,H3K4me1_Enh;E013,H3K4me1_Enh;E015,H3K4me1_Enh;E018,H3K4me1_Enh;E022,H3K4me1_Enh;E024,H3K4me1_Enh;E033,H3K4me1_Enh;E034,H3K4me1_Enh;E036,H3K4me1_Enh;E038,H3K4me1_Enh;E039,H3K4me1_Enh;E041,H3K4me1_Enh;E046,H3K4me1_Enh;E047,H3K4me1_Enh;E049,H3K4me1_Enh;E050,H3K…	E029;E050;E051;E059;E080;E081;E082;E083;E086;E088;E091;E122	.	EWSR1-FLI1;HDAC2_disc6;NERF1a;Pax-5_disc1	ENSG00000154240.12	0	0	CEP112	556546	gene
17	65774961	rs9972944	A	G	0.29	0.47	0.22	0.61	0	0	E001,7_Enh;E003,7_Enh;E006,7_Enh;E007,7_Enh;E009,7_Enh;E012,7_Enh;E013,7_Enh;E015,7_Enh;E018,7_Enh;E022,7_Enh;E033,7_Enh;E036,7_Enh;E039,7_Enh;E047,7_Enh;E049,7_Enh;E050,7_Enh;E051,2_TssAFlnk;E053,7_Enh;E054,7_Enh;E061,7_Enh;E077,7_Enh;E083,7_Enh;E086,7_Enh;E088,7_Enh;E089,7_Enh;E091,7_Enh;E092,7_Enh;E093,7_Enh;E095,7_Enh;E096,7_Enh;E105,7_Enh;E110,7_Enh;E112,7_Enh;E115,7_Enh;E118,7_Enh;E122,7_En…	E001,17_EnhW2;E002,17_EnhW2;E003,16_EnhW1;E004,17_EnhW2;E006,19_DNase;E007,16_EnhW1;E008,17_EnhW2;E009,17_EnhW2;E010,17_EnhW2;E011,17_EnhW2;E012,15_EnhAF;E013,16_EnhW1;E014,19_DNase;E015,19_DNase;E016,19_DNase;E018,16_EnhW1;E019,17_EnhW2;E020,19_DNase;E022,17_EnhW2;E024,17_EnhW2;E029,17_EnhW2;E030,17_EnhW2;E031,17_EnhW2;E033,16_EnhW1;E034,17_EnhW2;E035,17_EnhW2;E036,16_EnhW1;E037,16_EnhW1;E038,16…	E001,H3K4me1_Enh;E003,H3K4me1_Enh;E005,H3K4me1_Enh;E006,H3K4me1_Enh;E007,H3K4me1_Enh;E009,H3K4me1_Enh;E010,H3K4me1_Enh;E011,H3K4me1_Enh;E012,H3K4me1_Enh;E013,H3K4me1_Enh;E015,H3K4me1_Enh;E018,H3K4me1_Enh;E022,H3K4me1_Enh;E024,H3K4me1_Enh;E033,H3K4me1_Enh;E034,H3K4me1_Enh;E036,H3K4me1_Enh;E038,H3K4me1_Enh;E039,H3K4me1_Enh;E041,H3K4me1_Enh;E046,H3K4me1_Enh;E047,H3K4me1_Enh;E049,H3K4me1_Enh;E050,H3K…	E050;E051;E059;E081;E083;E084;E086;E088;E122	.	E2F_known1;E2F_known5;Ets_known1;GATA_disc3;GCM	ENSG00000154240.12	0	0	CEP112	556546	gene
17	65775146	rs9972885	G	T	0.29	0.48	0.22	0.61	0	0	E001,7_Enh;E003,7_Enh;E006,7_Enh;E007,7_Enh;E009,7_Enh;E012,7_Enh;E015,7_Enh;E018,7_Enh;E022,7_Enh;E033,7_Enh;E039,7_Enh;E047,7_Enh;E049,7_Enh;E050,7_Enh;E051,7_Enh;E053,7_Enh;E054,7_Enh;E061,7_Enh;E079,7_Enh;E083,7_Enh;E088,7_Enh;E089,7_Enh;E091,7_Enh;E092,6_EnhG;E093,7_Enh;E095,7_Enh;E096,7_Enh;E098,7_Enh;E105,7_Enh;E110,7_Enh;E115,7_Enh;E122,7_Enh;E126,7_Enh	E001,17_EnhW2;E002,17_EnhW2;E003,16_EnhW1;E004,17_EnhW2;E006,19_DNase;E007,16_EnhW1;E008,17_EnhW2;E009,17_EnhW2;E010,17_EnhW2;E011,17_EnhW2;E012,15_EnhAF;E013,17_EnhW2;E014,17_EnhW2;E016,17_EnhW2;E018,16_EnhW1;E019,16_EnhW1;E020,17_EnhW2;E021,17_EnhW2;E022,17_EnhW2;E024,17_EnhW2;E029,17_EnhW2;E030,17_EnhW2;E031,17_EnhW2;E033,16_EnhW1;E034,17_EnhW2;E035,17_EnhW2;E036,17_EnhW2;E038,16_EnhW1;E039,19…	E001,H3K4me1_Enh;E003,H3K4me1_Enh;E005,H3K4me1_Enh;E006,H3K4me1_Enh;E007,H3K4me1_Enh;E009,H3K4me1_Enh;E010,H3K4me1_Enh;E011,H3K4me1_Enh;E012,H3K4me1_Enh;E013,H3K4me1_Enh;E015,H3K4me1_Enh;E018,H3K4me1_Enh;E022,H3K4me1_Enh;E024,H3K4me1_Enh;E033,H3K4me1_Enh;E034,H3K4me1_Enh;E036,H3K4me1_Enh;E038,H3K4me1_Enh;E039,H3K4me1_Enh;E047,H3K4me1_Enh;E049,H3K4me1_Enh;E050,H3K4me1_Enh;E051,H3K4me1_Enh;E053,H3K…	E021;E022;E050;E059;E083;E088;E122	.	MAZ	ENSG00000154240.12	0	0	CEP112	556546	gene
17	65775198	rs9972883	C	A	0.29	0.48	0.22	0.61	0	0	E001,7_Enh;E003,7_Enh;E006,7_Enh;E007,7_Enh;E009,7_Enh;E012,7_Enh;E015,7_Enh;E018,7_Enh;E022,7_Enh;E033,7_Enh;E039,7_Enh;E047,7_Enh;E049,7_Enh;E050,7_Enh;E051,7_Enh;E053,7_Enh;E054,7_Enh;E061,7_Enh;E079,7_Enh;E083,7_Enh;E088,7_Enh;E089,7_Enh;E091,7_Enh;E092,6_EnhG;E093,7_Enh;E095,7_Enh;E096,7_Enh;E098,7_Enh;E105,7_Enh;E110,7_Enh;E115,7_Enh;E122,7_Enh;E126,7_Enh	E001,17_EnhW2;E002,17_EnhW2;E003,16_EnhW1;E004,17_EnhW2;E006,19_DNase;E007,16_EnhW1;E008,17_EnhW2;E009,17_EnhW2;E010,17_EnhW2;E011,17_EnhW2;E012,15_EnhAF;E013,17_EnhW2;E014,17_EnhW2;E016,17_EnhW2;E018,16_EnhW1;E019,16_EnhW1;E020,17_EnhW2;E021,17_EnhW2;E022,17_EnhW2;E024,17_EnhW2;E029,17_EnhW2;E030,17_EnhW2;E031,17_EnhW2;E033,16_EnhW1;E034,17_EnhW2;E035,17_EnhW2;E036,17_EnhW2;E038,16_EnhW1;E039,19…	E001,H3K4me1_Enh;E003,H3K4me1_Enh;E005,H3K4me1_Enh;E006,H3K4me1_Enh;E007,H3K4me1_Enh;E009,H3K4me1_Enh;E010,H3K4me1_Enh;E011,H3K4me1_Enh;E012,H3K4me1_Enh;E013,H3K4me1_Enh;E015,H3K4me1_Enh;E018,H3K4me1_Enh;E022,H3K4me1_Enh;E024,H3K4me1_Enh;E033,H3K4me1_Enh;E034,H3K4me1_Enh;E036,H3K4me1_Enh;E038,H3K4me1_Enh;E039,H3K4me1_Enh;E047,H3K4me1_Enh;E049,H3K4me1_Enh;E050,H3K4me1_Enh;E051,H3K4me1_Enh;E053,H3K…	E021;E083;E088;E122	.	Smad4	ENSG00000154240.12	0	0	CEP112	556546	gene
17	65775216	rs9972881	A	G	0.34	0.48	0.22	0.61	0	0	E001,7_Enh;E003,7_Enh;E006,7_Enh;E007,7_Enh;E009,7_Enh;E012,7_Enh;E015,7_Enh;E018,7_Enh;E022,7_Enh;E033,7_Enh;E039,7_Enh;E047,7_Enh;E049,7_Enh;E050,7_Enh;E051,7_Enh;E053,7_Enh;E054,7_Enh;E061,7_Enh;E079,7_Enh;E083,7_Enh;E088,7_Enh;E089,7_Enh;E091,7_Enh;E092,6_EnhG;E093,7_Enh;E095,7_Enh;E096,7_Enh;E098,7_Enh;E105,7_Enh;E110,7_Enh;E115,7_Enh;E122,7_Enh;E126,7_Enh	E001,17_EnhW2;E002,17_EnhW2;E003,16_EnhW1;E004,17_EnhW2;E006,19_DNase;E007,16_EnhW1;E008,17_EnhW2;E009,17_EnhW2;E010,17_EnhW2;E011,17_EnhW2;E012,15_EnhAF;E013,17_EnhW2;E014,17_EnhW2;E016,17_EnhW2;E018,16_EnhW1;E019,16_EnhW1;E020,17_EnhW2;E021,17_EnhW2;E022,17_EnhW2;E024,17_EnhW2;E029,17_EnhW2;E030,17_EnhW2;E031,17_EnhW2;E033,16_EnhW1;E034,17_EnhW2;E035,17_EnhW2;E036,17_EnhW2;E038,16_EnhW1;E039,19…	E001,H3K4me1_Enh;E003,H3K4me1_Enh;E005,H3K4me1_Enh;E006,H3K4me1_Enh;E007,H3K4me1_Enh;E009,H3K4me1_Enh;E010,H3K4me1_Enh;E011,H3K4me1_Enh;E012,H3K4me1_Enh;E013,H3K4me1_Enh;E015,H3K4me1_Enh;E018,H3K4me1_Enh;E022,H3K4me1_Enh;E024,H3K4me1_Enh;E033,H3K4me1_Enh;E034,H3K4me1_Enh;E036,H3K4me1_Enh;E038,H3K4me1_Enh;E039,H3K4me1_Enh;E047,H3K4me1_Enh;E049,H3K4me1_Enh;E050,H3K4me1_Enh;E051,H3K4me1_Enh;E053,H3K…	E003;E021;E083;E088;E122	.	STAT_known4	ENSG00000154240.12	0	0	CEP112	556546	gene
14	47440929	rs9323140	T	A	0.29	0.44	0.3	0.34	0	0	E001,7_Enh;E003,7_Enh;E014,7_Enh;E015,7_Enh;E018,7_Enh;E019,7_Enh;E020,7_Enh;E083,7_Enh	E001,17_EnhW2;E002,17_EnhW2;E003,17_EnhW2;E004,17_EnhW2;E008,17_EnhW2;E014,17_EnhW2;E015,17_EnhW2;E016,17_EnhW2;E018,17_EnhW2;E019,15_EnhAF;E020,17_EnhW2	E001,H3K4me1_Enh;E002,H3K4me1_Enh;E003,H3K4me1_Enh;E009,H3K4me1_Enh;E010,H3K4me1_Enh;E013,H3K4me1_Enh;E014,H3K4me1_Enh;E015,H3K4me1_Enh;E016,H3K4me1_Enh;E018,H3K4me1_Enh;E019,H3K4me1_Enh;E020,H3K4me1_Enh;E024,H3K4me1_Enh;E053,H3K4me1_Enh;E054,H3K4me1_Enh;E068,H3K4me1_Enh;E073,H3K4me1_Enh;E074,H3K4me1_Enh;E083,H3K4me1_Enh;E003,H3K27ac_Enh;E014,H3K27ac_Enh;E015,H3K27ac_Enh;E016,H3K27ac_Enh;E020,H3K…		.	CEBPB_known4;GR_known1;Gfi1_1;Hltf;Hoxa5_1;Pou2f2_known9	ENSG00000139915.13	0	0	MDGA2	835325	gene
3	37936223	rs17037196	G	A	0.18	0.02	0	0.03	0	0	E001,7_Enh;E004,7_Enh;E005,7_Enh;E006,7_Enh;E007,7_Enh;E008,7_Enh;E009,7_Enh;E010,7_Enh;E011,7_Enh;E012,7_Enh;E013,7_Enh;E014,7_Enh;E015,7_Enh;E016,7_Enh;E017,7_Enh;E019,7_Enh;E020,7_Enh;E021,7_Enh;E023,7_Enh;E024,7_Enh;E025,7_Enh;E026,2_TssAFlnk;E027,7_Enh;E028,7_Enh;E030,7_Enh;E035,7_Enh;E036,7_Enh;E049,2_TssAFlnk;E050,7_Enh;E051,2_TssAFlnk;E052,2_TssAFlnk;E053,7_Enh;E054,7_Enh;E055,7_Enh;E056,…	E001,14_EnhA2;E002,17_EnhW2;E003,15_EnhAF;E004,14_EnhA2;E005,13_EnhA1;E006,13_EnhA1;E007,14_EnhA2;E008,15_EnhAF;E009,14_EnhA2;E010,14_EnhA2;E011,14_EnhA2;E012,14_EnhA2;E013,13_EnhA1;E014,14_EnhA2;E015,14_EnhA2;E016,14_EnhA2;E017,13_EnhA1;E018,15_EnhAF;E019,14_EnhA2;E020,14_EnhA2;E021,15_EnhAF;E022,15_EnhAF;E023,13_EnhA1;E024,15_EnhAF;E025,13_EnhA1;E026,13_EnhA1;E027,13_EnhA1;E028,9_TxReg;E030,13_…	E001,H3K4me1_Enh;E002,H3K4me1_Enh;E003,H3K4me1_Enh;E004,H3K4me1_Enh;E005,H3K4me1_Enh;E006,H3K4me1_Enh;E007,H3K4me1_Enh;E008,H3K4me1_Enh;E009,H3K4me1_Enh;E010,H3K4me1_Enh;E011,H3K4me1_Enh;E012,H3K4me1_Enh;E013,H3K4me1_Enh;E014,H3K4me1_Enh;E015,H3K4me1_Enh;E016,H3K4me1_Enh;E017,H3K4me1_Enh;E018,H3K4me1_Enh;E019,H3K4me1_Enh;E020,H3K4me1_Enh;E021,H3K4me1_Enh;E022,H3K4me1_Enh;E023,H3K4me1_Enh;E024,H3K…	E005;E006;E017;E055;E056;E059;E083;E091;E114;E120;E121;E122;E125;E128	.	HDAC2_disc6;STAT_known1;TATA_known4	ENSG00000144677.10	0	0	CTDSPL	122509	gene
9	1129674	rs4237127	G	A	0.92	0.87	0.97	0.81	0	0	E001,7_Enh;E004,7_Enh;E012,7_Enh;E014,7_Enh;E015,7_Enh;E016,7_Enh;E018,12_EnhBiv;E019,11_BivFlnk;E020,1_TssA;E050,7_Enh	E001,16_EnhW1;E008,17_EnhW2;E011,17_EnhW2;E012,17_EnhW2;E014,16_EnhW1;E015,17_EnhW2;E016,16_EnhW1;E018,17_EnhW2;E019,14_EnhA2;E020,16_EnhW1;E024,19_DNase	E001,H3K4me1_Enh;E004,H3K4me1_Enh;E012,H3K4me1_Enh;E014,H3K4me1_Enh;E015,H3K4me1_Enh;E016,H3K4me1_Enh;E018,H3K4me1_Enh;E019,H3K4me1_Enh;E020,H3K4me1_Enh;E021,H3K4me1_Enh;E024,H3K4me1_Enh;E050,H3K4me1_Enh;E051,H3K4me1_Enh;E001,H3K4me3_Pro;E002,H3K4me3_Pro;E014,H3K4me3_Pro;E015,H3K4me3_Pro;E016,H3K4me3_Pro;E018,H3K4me3_Pro;E019,H3K4me3_Pro;E020,H3K4me3_Pro;E113,H3K4me3_Pro;E003,H3K27ac_Enh;E012,H3K…	E003;E008;E021;E022	.	ELF1_disc2	ENSG00000173253.10	3	72121	DMRT2	7694	gene
6	60483088	rs6934172	C	T					0	0	E001,7_Enh;E004,7_Enh;E019,7_Enh;E020,7_Enh	E020,17_EnhW2	E004,H3K4me1_Enh;E011,H3K4me1_Enh;E014,H3K4me1_Enh;E016,H3K4me1_Enh;E019,H3K4me1_Enh;E020,H3K4me1_Enh;E024,H3K4me1_Enh;E014,H3K4me3_Pro;E100,H3K4me3_Pro	E089	.	EBF_disc1;EBF_known1;HNF4_known4;RBP-Jkappa_1;RBP-Jkappa_2	ENSG00000146143.12	0	0	PRIM2	332044	gene
18	36350272	rs4799416	A	G	0.19	0.33	0.25	0.25	0	0	E001,7_Enh;E005,7_Enh;E006,7_Enh;E008,7_Enh;E012,7_Enh;E013,7_Enh;E015,7_Enh;E016,7_Enh;E017,7_Enh;E018,7_Enh;E019,7_Enh;E020,7_Enh;E022,7_Enh;E024,7_Enh;E025,7_Enh;E026,7_Enh;E028,7_Enh;E049,7_Enh;E052,7_Enh;E066,7_Enh;E077,7_Enh;E083,7_Enh;E084,7_Enh;E085,7_Enh;E086,7_Enh;E089,7_Enh;E090,7_Enh;E095,7_Enh;E098,7_Enh;E101,7_Enh;E102,7_Enh;E104,7_Enh;E105,7_Enh;E106,7_Enh;E107,2_TssAFlnk;E108,7_En…	E001,17_EnhW2;E002,17_EnhW2;E003,17_EnhW2;E004,17_EnhW2;E005,15_EnhAF;E006,16_EnhW1;E007,17_EnhW2;E008,17_EnhW2;E009,17_EnhW2;E010,17_EnhW2;E011,17_EnhW2;E012,15_EnhAF;E013,17_EnhW2;E014,16_EnhW1;E015,17_EnhW2;E016,17_EnhW2;E018,17_EnhW2;E019,14_EnhA2;E020,17_EnhW2;E022,15_EnhAF;E023,15_EnhAF;E025,15_EnhAF;E026,15_EnhAF;E027,12_TxEnhW;E049,13_EnhA1;E052,15_EnhAF;E059,17_EnhW2;E063,17_EnhW2;E065,1…	E001,H3K4me1_Enh;E002,H3K4me1_Enh;E003,H3K4me1_Enh;E004,H3K4me1_Enh;E005,H3K4me1_Enh;E006,H3K4me1_Enh;E007,H3K4me1_Enh;E008,H3K4me1_Enh;E009,H3K4me1_Enh;E011,H3K4me1_Enh;E012,H3K4me1_Enh;E013,H3K4me1_Enh;E014,H3K4me1_Enh;E015,H3K4me1_Enh;E016,H3K4me1_Enh;E017,H3K4me1_Enh;E018,H3K4me1_Enh;E019,H3K4me1_Enh;E020,H3K4me1_Enh;E021,H3K4me1_Enh;E022,H3K4me1_Enh;E023,H3K4me1_Enh;E024,H3K4me1_Enh;E025,H3K…	E022;E086;E116	.	NRSF_known2	ENSG00000134775.9	0	0	FHOD3	482341	gene
6	30761710	rs11966040	T	G	0.16	0.06	0.06	0.03	0	0	E001,7_Enh;E005,7_Enh;E008,7_Enh;E013,7_Enh;E015,7_Enh;E016,7_Enh;E018,7_Enh;E026,7_Enh;E027,7_Enh;E028,7_Enh;E052,7_Enh;E053,7_Enh;E057,7_Enh;E058,7_Enh;E076,7_Enh;E086,7_Enh;E099,7_Enh;E103,7_Enh;E114,7_Enh;E117,7_Enh;E118,7_Enh;E119,7_Enh;E121,7_Enh;E126,7_Enh;E127,7_Enh;E129,7_Enh	E001,17_EnhW2;E002,17_EnhW2;E004,17_EnhW2;E005,18_EnhAc;E006,17_EnhW2;E008,17_EnhW2;E012,17_EnhW2;E013,18_EnhAc;E014,17_EnhW2;E015,17_EnhW2;E018,17_EnhW2;E025,18_EnhAc;E026,15_EnhAF;E027,18_EnhAc;E028,15_EnhAF;E049,18_EnhAc;E052,18_EnhAc;E055,17_EnhW2;E056,17_EnhW2;E057,15_EnhAF;E058,15_EnhAF;E079,17_EnhW2;E099,18_EnhAc;E114,15_EnhAF;E117,18_EnhAc;E118,18_EnhAc;E119,15_EnhAF;E121,15_EnhAF;E125,15…	E001,H3K4me1_Enh;E002,H3K4me1_Enh;E004,H3K4me1_Enh;E005,H3K4me1_Enh;E008,H3K4me1_Enh;E010,H3K4me1_Enh;E011,H3K4me1_Enh;E013,H3K4me1_Enh;E014,H3K4me1_Enh;E015,H3K4me1_Enh;E016,H3K4me1_Enh;E017,H3K4me1_Enh;E018,H3K4me1_Enh;E019,H3K4me1_Enh;E020,H3K4me1_Enh;E024,H3K4me1_Enh;E025,H3K4me1_Enh;E026,H3K4me1_Enh;E027,H3K4me1_Enh;E028,H3K4me1_Enh;E030,H3K4me1_Enh;E052,H3K4me1_Enh;E053,H3K4me1_Enh;E054,H3K…		.	CEBPB_known6;Eomes;Foxp1;Pax-4_4;TATA_known1	ENSG00000228022.1	5	5114	HCG20	25425	gene
17	65774503	rs6504357	G	A	0.64	0.5	0.79	0.37	0	0	E001,7_Enh;E006,7_Enh;E009,7_Enh;E012,7_Enh;E022,7_Enh;E024,7_Enh;E033,7_Enh;E034,7_Enh;E036,7_Enh;E038,7_Enh;E039,7_Enh;E041,7_Enh;E047,7_Enh;E050,7_Enh;E051,7_Enh;E054,7_Enh;E061,7_Enh;E077,7_Enh;E083,7_Enh;E088,7_Enh;E089,7_Enh;E091,7_Enh;E093,7_Enh;E095,7_Enh;E096,7_Enh;E105,7_Enh;E110,7_Enh;E112,7_Enh;E113,7_Enh;E115,7_Enh	E007,17_EnhW2;E013,17_EnhW2;E029,17_EnhW2;E030,17_EnhW2;E031,17_EnhW2;E033,17_EnhW2;E035,17_EnhW2;E036,17_EnhW2;E037,17_EnhW2;E038,17_EnhW2;E039,19_DNase;E040,17_EnhW2;E041,19_DNase;E042,17_EnhW2;E043,17_EnhW2;E044,17_EnhW2;E045,17_EnhW2;E046,17_EnhW2;E047,19_DNase;E050,14_EnhA2;E051,14_EnhA2;E059,17_EnhW2;E062,17_EnhW2;E081,17_EnhW2;E083,14_EnhA2;E086,17_EnhW2;E088,17_EnhW2;E092,17_EnhW2;E093,17…	E001,H3K4me1_Enh;E003,H3K4me1_Enh;E005,H3K4me1_Enh;E007,H3K4me1_Enh;E009,H3K4me1_Enh;E010,H3K4me1_Enh;E011,H3K4me1_Enh;E012,H3K4me1_Enh;E015,H3K4me1_Enh;E018,H3K4me1_Enh;E022,H3K4me1_Enh;E024,H3K4me1_Enh;E033,H3K4me1_Enh;E034,H3K4me1_Enh;E036,H3K4me1_Enh;E038,H3K4me1_Enh;E039,H3K4me1_Enh;E041,H3K4me1_Enh;E046,H3K4me1_Enh;E047,H3K4me1_Enh;E050,H3K4me1_Enh;E051,H3K4me1_Enh;E054,H3K4me1_Enh;E055,H3K…	E021;E022;E083;E088;E093;E124;E125	.	Egr-1_disc2;Ets_known1;Ets_known7;FEV;GATA_disc3;Nanog_known1;Pax-5_disc4	ENSG00000154240.12	0	0	CEP112	556546	gene
2	45389962	rs6719211	T	G	0.32	0.2	0.1	0.18	0	0	E001,7_Enh;E008,7_Enh;E014,7_Enh;E016,7_Enh;E018,7_Enh;E019,7_Enh;E020,7_Enh;E118,7_Enh;E122,7_Enh	E001,17_EnhW2;E003,17_EnhW2;E011,17_EnhW2;E012,17_EnhW2;E014,17_EnhW2;E015,17_EnhW2;E016,17_EnhW2;E018,17_EnhW2;E019,17_EnhW2;E020,15_EnhAF	E001,H3K4me1_Enh;E003,H3K4me1_Enh;E004,H3K4me1_Enh;E008,H3K4me1_Enh;E009,H3K4me1_Enh;E011,H3K4me1_Enh;E012,H3K4me1_Enh;E013,H3K4me1_Enh;E014,H3K4me1_Enh;E015,H3K4me1_Enh;E016,H3K4me1_Enh;E018,H3K4me1_Enh;E019,H3K4me1_Enh;E020,H3K4me1_Enh;E052,H3K4me1_Enh;E074,H3K4me1_Enh;E087,H3K4me1_Enh;E110,H3K4me1_Enh;E114,H3K4me1_Enh;E118,H3K4me1_Enh;E120,H3K4me1_Enh;E122,H3K4me1_Enh;E003,H3K27ac_Enh;E004,H3K…		.	Myb_3	ENSG00000068784.8	0	0	SRBD1	223485	gene
14	47427666	rs7148160	G	A	0.31	0.44	0.39	0.34	0	0	E001,7_Enh;E009,7_Enh;E014,7_Enh	E001,19_DNase;E009,19_DNase;E010,17_EnhW2;E012,19_DNase;E014,19_DNase;E019,19_DNase;E081,19_DNase;E082,19_DNase	E001,H3K4me1_Enh;E007,H3K4me1_Enh;E009,H3K4me1_Enh;E015,H3K4me1_Enh;E018,H3K4me1_Enh;E053,H3K4me1_Enh;E070,H3K4me1_Enh;E072,H3K4me1_Enh;E087,H3K4me1_Enh;E014,H3K27ac_Enh;E014,H3K9ac_Pro;E040,H3K4me3_Pro	E081	.	Foxa_disc5;Hoxa9;Zfp105	ENSG00000139915.13	0	0	MDGA2	835325	gene
10	21155971	rs7090013	A	G	0.34	0.18	0.24	0.16	0	0	E001,7_Enh;E010,7_Enh;E011,7_Enh;E015,7_Enh;E068,7_Enh	E019,17_EnhW2;E020,17_EnhW2;E067,17_EnhW2;E068,16_EnhW1;E069,17_EnhW2;E071,17_EnhW2;E072,17_EnhW2;E074,17_EnhW2	E001,H3K4me1_Enh;E007,H3K4me1_Enh;E010,H3K4me1_Enh;E011,H3K4me1_Enh;E012,H3K4me1_Enh;E014,H3K4me1_Enh;E015,H3K4me1_Enh;E020,H3K4me1_Enh;E067,H3K4me1_Enh;E068,H3K4me1_Enh;E071,H3K4me1_Enh;E072,H3K4me1_Enh;E074,H3K4me1_Enh;E087,H3K4me1_Enh;E110,H3K4me1_Enh;E007,H3K27ac_Enh;E008,H3K27ac_Enh;E011,H3K27ac_Enh;E019,H3K27ac_Enh;E020,H3K27ac_Enh;E068,H3K27ac_Enh;E069,H3K27ac_Enh;E068,H3K9ac_Pro		.	Arid5a;Foxa_disc2	ENSG00000078114.13	0	0	NEBL	394214	gene
17	65785497	rs7502798	C	T	0.5	0.52	0.22	0.66	0	0	E001,7_Enh;E013,7_Enh;E014,7_Enh;E018,7_Enh;E019,7_Enh;E020,7_Enh;E023,7_Enh;E025,7_Enh;E026,7_Enh;E028,7_Enh;E049,7_Enh;E050,7_Enh;E051,7_Enh;E052,7_Enh;E057,7_Enh;E058,7_Enh;E061,7_Enh;E076,7_Enh;E077,7_Enh;E078,7_Enh;E083,7_Enh;E103,7_Enh;E107,7_Enh;E110,7_Enh;E114,2_TssAFlnk;E117,7_Enh;E118,7_Enh;E119,7_Enh;E120,7_Enh;E121,7_Enh;E122,7_Enh;E123,7_Enh;E125,7_Enh;E126,7_Enh;E127,7_Enh;E128,7_En…	E001,16_EnhW1;E006,19_DNase;E012,17_EnhW2;E013,14_EnhA2;E014,19_DNase;E015,19_DNase;E016,19_DNase;E017,18_EnhAc;E018,17_EnhW2;E019,15_EnhAF;E020,19_DNase;E023,14_EnhA2;E025,13_EnhA1;E026,13_EnhA1;E027,19_DNase;E028,14_EnhA2;E035,17_EnhW2;E036,17_EnhW2;E049,15_EnhAF;E050,19_DNase;E051,16_EnhW1;E052,13_EnhA1;E055,18_EnhAc;E056,18_EnhAc;E057,15_EnhAF;E058,19_DNase;E059,19_DNase;E061,22_PromP;E063,14…	E001,H3K4me1_Enh;E013,H3K4me1_Enh;E014,H3K4me1_Enh;E018,H3K4me1_Enh;E019,H3K4me1_Enh;E023,H3K4me1_Enh;E025,H3K4me1_Enh;E026,H3K4me1_Enh;E027,H3K4me1_Enh;E028,H3K4me1_Enh;E036,H3K4me1_Enh;E049,H3K4me1_Enh;E050,H3K4me1_Enh;E051,H3K4me1_Enh;E052,H3K4me1_Enh;E055,H3K4me1_Enh;E056,H3K4me1_Enh;E057,H3K4me1_Enh;E058,H3K4me1_Enh;E061,H3K4me1_Enh;E063,H3K4me1_Enh;E066,H3K4me1_Enh;E071,H3K4me1_Enh;E073,H3K…	E006;E017;E028;E050;E055;E056;E057;E059;E083;E085;E088;E090;E092;E094;E097;E098;E100;E114;E117;E119;E120;E121;E122;E123;E125;E126;E127;E128	A549,GR,HudsonAlpha,DEX_50nM;HUVEC,CFOS,UCD,None;HUVEC,CJUN,Stanford,None;HeLa-S3,P300,Stanford,None;HeLa-S3,STAT3,Stanford,None;HepG2,CJUN,Stanford,None;SK-N-SH_RA,P300,HudsonAlpha,None;SK-N-SH_RA,YY1,HudsonAlpha,None	Duxl;Foxp1;Rad21_disc9;Zfp105;p300_disc6	ENSG00000154240.12	0	0	CEP112	556546	gene
4	86422864	rs12508545	A	T	0.01	0.0028	0.01	0.01	1	1	E001,7_Enh;E014,7_Enh;E015,7_Enh;E016,7_Enh;E020,7_Enh	E001,17_EnhW2;E002,17_EnhW2;E003,17_EnhW2;E012,17_EnhW2;E015,17_EnhW2;E018,17_EnhW2;E020,16_EnhW1	E001,H3K4me1_Enh;E002,H3K4me1_Enh;E014,H3K4me1_Enh;E015,H3K4me1_Enh;E016,H3K4me1_Enh;E018,H3K4me1_Enh;E019,H3K4me1_Enh;E020,H3K4me1_Enh;E024,H3K4me1_Enh;E087,H3K4me1_Enh;E004,H3K27ac_Enh;E012,H3K27ac_Enh;E020,H3K27ac_Enh;E067,H3K27ac_Enh;E069,H3K27ac_Enh;E072,H3K27ac_Enh;E073,H3K27ac_Enh;E018,H3K9ac_Pro		.	HDAC2_disc6;Hoxb13;Mef2_disc1;Mef2_known6;p300_disc6	ENSG00000109339.14	0	0	MAPK10	579008	gene
6	60686929	rs4629677	T	C	0.99	0.84	0.93	0.81	0	0	E001,7_Enh;E014,7_Enh;E016,7_Enh	E015,17_EnhW2	E001,H3K4me1_Enh;E014,H3K4me1_Enh;E016,H3K4me1_Enh;E018,H3K4me1_Enh;E019,H3K4me1_Enh;E020,H3K4me1_Enh;E024,H3K4me1_Enh;E001,H3K4me3_Pro;E014,H3K27ac_Enh;E015,H3K27ac_Enh;E016,H3K27ac_Enh;E020,H3K27ac_Enh;E016,H3K9ac_Pro		.	.	ENSG00000231273.1	5	36218	RP11-343D24.2	750	no protein, long intergenic non-preotein coding RNA
1	98450692	rs11166016	T	C	0.23	0.41	0.56	0.27	1	1	E001,7_Enh;E020,7_Enh;E024,7_Enh		E001,H3K4me1_Enh;E002,H3K4me1_Enh;E010,H3K4me1_Enh;E014,H3K4me1_Enh;E016,H3K4me1_Enh;E018,H3K4me1_Enh;E020,H3K4me1_Enh;E024,H3K4me1_Enh;E053,H3K4me1_Enh;E019,H3K9ac_Pro;E020,H3K27ac_Enh		.	.	ENSG00000221777.1	3	77192	AL160056.1	0	sequencing in progress
14	47435447	rs2416075	A	G	0.46	0.46	0.39	0.34	0	0	E001,7_Enh;E053,7_Enh;E054,7_Enh;E068,7_Enh;E071,7_Enh;E072,7_Enh;E074,7_Enh;E083,7_Enh	E054,17_EnhW2;E067,17_EnhW2;E068,17_EnhW2;E072,17_EnhW2;E073,17_EnhW2	E001,H3K4me1_Enh;E007,H3K4me1_Enh;E010,H3K4me1_Enh;E015,H3K4me1_Enh;E018,H3K4me1_Enh;E019,H3K4me1_Enh;E020,H3K4me1_Enh;E053,H3K4me1_Enh;E054,H3K4me1_Enh;E067,H3K4me1_Enh;E068,H3K4me1_Enh;E069,H3K4me1_Enh;E071,H3K4me1_Enh;E073,H3K4me1_Enh;E074,H3K4me1_Enh;E081,H3K4me1_Enh;E083,H3K4me1_Enh;E015,H3K27ac_Enh;E020,H3K27ac_Enh;E067,H3K27ac_Enh;E068,H3K27ac_Enh;E072,H3K27ac_Enh;E109,H3K4me3_Pro		.	AP-1_disc7;Foxp3;NF-E2_disc4;SP1_known4	ENSG00000139915.13	0	0	MDGA2	835325	gene
20	43028946	rs206163	A	G	0.2	0.54	0.76	0.71	0	0	E002,12_EnhBiv;E014,12_EnhBiv;E015,12_EnhBiv;E018,12_EnhBiv;E027,7_Enh;E088,7_Enh		E002,H3K4me1_Enh;E004,H3K4me1_Enh;E011,H3K4me1_Enh;E015,H3K4me1_Enh;E016,H3K4me1_Enh;E018,H3K4me1_Enh;E027,H3K4me1_Enh;E088,H3K4me1_Enh;E004,H3K9ac_Pro;E007,H3K9ac_Pro;E018,H3K4me3_Pro;E083,H3K4me3_Pro;E096,H3K4me3_Pro;E021,H3K27ac_Enh		.	Pou1f1_2;Pou3f2_1	ENSG00000196090.7	0	0	PTPRT	1117218	gene
6	57446100	rs2067973	C	A					0	0	E002,7_Enh;E007,7_Enh;E008,7_Enh;E009,7_Enh;E010,7_Enh;E011,7_Enh;E014,7_Enh;E016,7_Enh;E017,7_Enh;E018,7_Enh;E019,7_Enh;E020,7_Enh;E023,7_Enh;E025,7_Enh;E026,7_Enh;E035,7_Enh;E044,7_Enh;E049,7_Enh;E050,7_Enh;E051,7_Enh;E052,7_Enh;E053,7_Enh;E059,7_Enh;E074,7_Enh;E094,7_Enh;E115,7_Enh;E116,7_Enh;E121,7_Enh;E122,2_TssAFlnk;E126,7_Enh;E129,7_Enh	E001,17_EnhW2;E002,17_EnhW2;E003,17_EnhW2;E004,17_EnhW2;E008,17_EnhW2;E009,17_EnhW2;E010,16_EnhW1;E011,19_DNase;E012,17_EnhW2;E014,16_EnhW1;E015,17_EnhW2;E016,16_EnhW1;E017,19_DNase;E018,17_EnhW2;E019,16_EnhW1;E020,14_EnhA2;E021,17_EnhW2;E022,17_EnhW2;E023,15_EnhAF;E024,16_EnhW1;E025,14_EnhA2;E026,15_EnhAF;E031,17_EnhW2;E033,16_EnhW1;E035,16_EnhW1;E036,16_EnhW1;E041,19_DNase;E042,17_EnhW2;E044,22…	E003,H3K27ac_Enh;E008,H3K27ac_Enh;E012,H3K27ac_Enh;E015,H3K27ac_Enh;E026,H3K27ac_Enh;E049,H3K27ac_Enh;E050,H3K27ac_Enh;E115,H3K27ac_Enh;E116,H3K27ac_Enh;E122,H3K27ac_Enh;E129,H3K27ac_Enh;E003,H3K4me1_Enh;E008,H3K4me1_Enh;E009,H3K4me1_Enh;E010,H3K4me1_Enh;E011,H3K4me1_Enh;E014,H3K4me1_Enh;E015,H3K4me1_Enh;E016,H3K4me1_Enh;E017,H3K4me1_Enh;E018,H3K4me1_Enh;E019,H3K4me1_Enh;E020,H3K4me1_Enh;E023,H3K…	E008;E059;E116;E122;E128	PBDE,GATA1,UCD,None	Elf5;Foxc1_1;Nkx6-1_3;PU.1_known1;PU.1_known2;Pou3f4;STAT_known3	ENSG00000146143.12	0	0	PRIM2	332044	gene
11	115291656	rs11215467	T	C	0.13	0.12	0.14	0.1	1	1	E002,7_Enh;E007,7_Enh;E009,7_Enh;E010,7_Enh;E011,7_Enh;E012,7_Enh;E013,7_Enh;E053,7_Enh;E054,7_Enh;E059,7_Enh;E061,7_Enh;E063,7_Enh;E067,7_Enh;E068,7_Enh;E070,7_Enh;E071,7_Enh;E074,7_Enh;E080,7_Enh;E081,7_Enh;E083,7_Enh;E086,7_Enh;E087,7_Enh;E095,7_Enh;E100,7_Enh;E108,7_Enh;E122,2_TssAFlnk	E004,17_EnhW2;E009,17_EnhW2;E010,14_EnhA2;E011,17_EnhW2;E012,17_EnhW2;E013,17_EnhW2;E053,17_EnhW2;E054,15_EnhAF;E059,17_EnhW2;E061,14_EnhA2;E063,19_DNase;E067,17_EnhW2;E068,14_EnhA2;E069,17_EnhW2;E070,17_EnhW2;E071,15_EnhAF;E072,17_EnhW2;E073,17_EnhW2;E074,17_EnhW2;E080,14_EnhA2;E081,17_EnhW2;E082,17_EnhW2;E083,14_EnhA2;E087,17_EnhW2;E089,17_EnhW2;E104,17_EnhW2;E105,17_EnhW2;E107,17_EnhW2;E122,13…	E001,H3K4me1_Enh;E002,H3K4me1_Enh;E007,H3K4me1_Enh;E009,H3K4me1_Enh;E010,H3K4me1_Enh;E011,H3K4me1_Enh;E012,H3K4me1_Enh;E013,H3K4me1_Enh;E014,H3K4me1_Enh;E015,H3K4me1_Enh;E016,H3K4me1_Enh;E017,H3K4me1_Enh;E020,H3K4me1_Enh;E023,H3K4me1_Enh;E053,H3K4me1_Enh;E054,H3K4me1_Enh;E061,H3K4me1_Enh;E063,H3K4me1_Enh;E067,H3K4me1_Enh;E068,H3K4me1_Enh;E069,H3K4me1_Enh;E070,H3K4me1_Enh;E071,H3K4me1_Enh;E072,H3K…	E059;E122	.	TEF-1_2	ENSG00000182985.9	0	0	CADM1	335739	gene
3	73494429	rs4371454	T	A	0.15	0.51	0.72	0.48	0	0	E002,7_Enh;E013,7_Enh;E015,7_Enh;E020,7_Enh;E023,2_TssAFlnk;E025,7_Enh;E026,2_TssAFlnk;E049,7_Enh;E052,7_Enh;E063,7_Enh;E070,7_Enh;E072,7_Enh;E076,7_Enh;E083,7_Enh;E088,7_Enh;E097,7_Enh;E103,7_Enh;E108,7_Enh;E111,7_Enh;E120,7_Enh;E121,7_Enh;E125,7_Enh;E126,7_Enh;E129,7_Enh	E001,16_EnhW1;E004,17_EnhW2;E006,17_EnhW2;E011,17_EnhW2;E012,17_EnhW2;E013,14_EnhA2;E017,18_EnhAc;E023,13_EnhA1;E025,13_EnhA1;E026,2_PromU;E049,13_EnhA1;E052,13_EnhA1;E055,14_EnhA2;E056,18_EnhAc;E063,17_EnhW2;E065,22_PromP;E072,16_EnhW1;E076,14_EnhA2;E078,17_EnhW2;E083,14_EnhA2;E086,17_EnhW2;E088,14_EnhA2;E097,22_PromP;E099,22_PromP;E103,16_EnhW1;E108,17_EnhW2;E111,16_EnhW1;E114,15_EnhAF;E117,18_…	E001,H3K4me1_Enh;E002,H3K4me1_Enh;E011,H3K4me1_Enh;E013,H3K4me1_Enh;E014,H3K4me1_Enh;E015,H3K4me1_Enh;E016,H3K4me1_Enh;E017,H3K4me1_Enh;E018,H3K4me1_Enh;E019,H3K4me1_Enh;E020,H3K4me1_Enh;E023,H3K4me1_Enh;E024,H3K4me1_Enh;E025,H3K4me1_Enh;E026,H3K4me1_Enh;E027,H3K4me1_Enh;E049,H3K4me1_Enh;E052,H3K4me1_Enh;E053,H3K4me1_Enh;E054,H3K4me1_Enh;E055,H3K4me1_Enh;E056,H3K4me1_Enh;E063,H3K4me1_Enh;E067,H3K…		.	ATF2;Foxa_disc1;Foxa_known3;Foxa_known4;Foxi1;Foxl1_1;Foxo_3;HDAC2_disc2;Nanog_disc1;Pou2f2_known6;Pou2f2_known7;Pou2f2_known9;Pou3f2_3;TCF12_disc2	ENSG00000121440.10	0	0	PDZRN3	242507	gene
2	136655492	rs9789419	C	T	0.25	0.3	0.77	0.23	0	0	E002,7_Enh;E027,7_Enh		E001,H3K4me1_Enh;E002,H3K4me1_Enh;E008,H3K4me1_Enh;E014,H3K4me1_Enh;E015,H3K4me1_Enh;E018,H3K4me1_Enh;E020,H3K4me1_Enh;E027,H3K4me1_Enh;E065,H3K4me1_Enh;E092,H3K4me1_Enh;E103,H3K4me1_Enh;E108,H3K4me1_Enh;E111,H3K4me1_Enh;E008,H3K27ac_Enh;E093,H3K27ac_Enh;E108,H3K27ac_Enh;E088,H3K4me3_Pro		.	LBP-1_1	ENSG00000221762.1	5	10299	AC092786.1	0	sequencing in progress
6	27091664	rs926300	A	T	0.15	0.12	0.01	0.15	0	0	E003,1_TssA;E008,1_TssA;E010,10_TssBiv;E012,10_TssBiv;E015,1_TssA;E016,1_TssA;E018,7_Enh;E019,1_TssA;E032,12_EnhBiv;E034,12_EnhBiv;E040,12_EnhBiv;E041,12_EnhBiv;E050,12_EnhBiv;E051,10_TssBiv;E053,12_EnhBiv;E054,10_TssBiv;E091,7_Enh;E104,1_TssA;E114,1_TssA;E116,7_Enh;E117,1_TssA;E123,1_TssA	E001,22_PromP;E002,22_PromP;E003,22_PromP;E004,22_PromP;E005,19_DNase;E006,19_DNase;E007,22_PromP;E008,22_PromP;E009,22_PromP;E010,23_PromBiv;E011,22_PromP;E012,22_PromP;E013,22_PromP;E014,22_PromP;E015,22_PromP;E016,22_PromP;E017,19_DNase;E018,22_PromP;E019,22_PromP;E020,22_PromP;E021,22_PromP;E022,22_PromP;E023,22_PromP;E024,22_PromP;E025,19_DNase;E026,19_DNase;E027,22_PromP;E028,19_DNase;E033,…	E001,H3K4me3_Pro;E003,H3K4me3_Pro;E010,H3K4me3_Pro;E011,H3K4me3_Pro;E012,H3K4me3_Pro;E013,H3K4me3_Pro;E014,H3K4me3_Pro;E015,H3K4me3_Pro;E016,H3K4me3_Pro;E018,H3K4me3_Pro;E019,H3K4me3_Pro;E020,H3K4me3_Pro;E023,H3K4me3_Pro;E025,H3K4me3_Pro;E026,H3K4me3_Pro;E027,H3K4me3_Pro;E028,H3K4me3_Pro;E036,H3K4me3_Pro;E038,H3K4me3_Pro;E039,H3K4me3_Pro;E042,H3K4me3_Pro;E045,H3K4me3_Pro;E049,H3K4me3_Pro;E051,H3K…	E059;E117;E123	GM12878,P300,Stanford,None;GM12878,TBP,Stanford,None;H1-hESC,TBP,Stanford,None;HEK293(b),KAP1,UCD,None;HeLa-S3,BRF1,Harvard,None;HeLa-S3,RFX5,Stanford,None;HeLa-S3,RPC155,Harvard,None;HeLa-S3,TBP,Stanford,None;HepG2,HSF1,Stanford,forskolin;HepG2,TBP,Stanford,None;K562,BRF1,Harvard,None;K562,JUNB,UChicago,None;K562,RPC155,Harvard,None;K562,TBP,Stanford,None	CEBPB_known4;DMRT5;Dobox4;EBF_known3;Ncx_2;PLZF;SIX5_known2	ENSG00000222800.1	3	18125	U2	81	no protein, small nuclear RNA
11	65454834	rs2846861	A	G	0.59	0.52	0.41	0.31	0	0	E003,11_BivFlnk;E004,10_TssBiv;E005,7_Enh;E006,2_TssAFlnk;E008,1_TssA;E014,10_TssBiv;E015,10_TssBiv;E016,10_TssBiv;E017,2_TssAFlnk;E018,11_BivFlnk;E019,11_BivFlnk;E020,10_TssBiv;E021,10_TssBiv;E022,11_BivFlnk;E023,1_TssA;E024,11_BivFlnk;E025,1_TssA;E026,2_TssAFlnk;E027,2_TssAFlnk;E028,2_TssAFlnk;E029,2_TssAFlnk;E030,2_TssAFlnk;E031,2_TssAFlnk;E032,2_TssAFlnk;E033,2_TssAFlnk;E034,2_TssAFlnk;E035,2…	E001,2_PromU;E002,23_PromBiv;E003,2_PromU;E004,2_PromU;E005,3_PromD1;E006,3_PromD1;E007,2_PromU;E008,2_PromU;E009,2_PromU;E010,3_PromD1;E011,2_PromU;E012,2_PromU;E013,3_PromD1;E014,23_PromBiv;E015,2_PromU;E016,2_PromU;E017,3_PromD1;E018,2_PromU;E019,2_PromU;E020,2_PromU;E021,2_PromU;E022,2_PromU;E023,3_PromD1;E024,2_PromU;E025,3_PromD1;E026,3_PromD1;E027,3_PromD1;E028,3_PromD1;E029,3_PromD1;E030,…	E001,H3K4me1_Enh;E002,H3K4me1_Enh;E003,H3K4me1_Enh;E005,H3K4me1_Enh;E006,H3K4me1_Enh;E013,H3K4me1_Enh;E015,H3K4me1_Enh;E017,H3K4me1_Enh;E018,H3K4me1_Enh;E019,H3K4me1_Enh;E020,H3K4me1_Enh;E021,H3K4me1_Enh;E022,H3K4me1_Enh;E023,H3K4me1_Enh;E024,H3K4me1_Enh;E025,H3K4me1_Enh;E026,H3K4me1_Enh;E027,H3K4me1_Enh;E028,H3K4me1_Enh;E029,H3K4me1_Enh;E030,H3K4me1_Enh;E031,H3K4me1_Enh;E032,H3K4me1_Enh;E033,H3K…	E003;E004;E006;E007;E008;E017;E022;E028;E029;E032;E034;E050;E051;E055;E056;E057;E059;E083;E084;E085;E086;E088;E089;E090;E092;E093;E097;E098;E100;E109;E114;E116;E118;E119;E121;E123;E124;E125;E126;E128	.	GATA_disc5;PPAR_2	ENSG00000173727.7	5	422	AP000769.1	0	sequencing in progress
22	44754779	rs5765956	C	T	0.42	0.48	0.58	0.55	0	0	E003,12_EnhBiv;E005,7_Enh;E015,7_Enh;E018,2_TssAFlnk;E020,12_EnhBiv;E021,7_Enh;E022,7_Enh;E024,7_Enh;E025,12_EnhBiv;E027,7_Enh;E028,7_Enh;E057,7_Enh;E058,7_Enh;E075,12_EnhBiv;E077,7_Enh;E079,7_Enh;E080,12_EnhBiv;E084,7_Enh;E085,7_Enh;E086,7_Enh;E088,7_Enh;E090,12_EnhBiv;E091,7_Enh;E092,12_EnhBiv;E094,7_Enh;E098,7_Enh;E099,7_Enh;E101,2_TssAFlnk;E102,7_Enh;E110,7_Enh;E119,7_Enh;E127,7_Enh	E001,12_TxEnhW;E002,17_EnhW2;E003,17_EnhW2;E005,4_PromD2;E008,12_TxEnhW;E014,17_EnhW2;E018,4_PromD2;E022,17_EnhW2;E027,12_TxEnhW;E028,4_PromD2;E057,12_TxEnhW;E058,10_TxEnh5;E075,17_EnhW2;E077,23_PromBiv;E079,12_TxEnhW;E080,23_PromBiv;E084,15_EnhAF;E085,10_TxEnh5;E086,23_PromBiv;E088,23_PromBiv;E091,23_PromBiv;E092,23_PromBiv;E094,12_TxEnhW;E098,15_EnhAF;E099,15_EnhAF;E101,13_EnhA1;E102,9_TxReg;E1…	E001,H3K4me1_Enh;E002,H3K4me1_Enh;E003,H3K4me1_Enh;E005,H3K4me1_Enh;E006,H3K4me1_Enh;E007,H3K4me1_Enh;E008,H3K4me1_Enh;E011,H3K4me1_Enh;E012,H3K4me1_Enh;E013,H3K4me1_Enh;E014,H3K4me1_Enh;E015,H3K4me1_Enh;E016,H3K4me1_Enh;E017,H3K4me1_Enh;E018,H3K4me1_Enh;E019,H3K4me1_Enh;E020,H3K4me1_Enh;E021,H3K4me1_Enh;E022,H3K4me1_Enh;E023,H3K4me1_Enh;E024,H3K4me1_Enh;E025,H3K4me1_Enh;E026,H3K4me1_Enh;E027,H3K…	E008;E021;E028;E057;E091;E119;E127	.	CHD2_disc2;E2F_disc5;TATA_disc8	ENSG00000248405.5	0	0	PRR5-ARHGAP8	160473	gene
4	86506296	rs12508156	T	C	0.02	0.0028	0.01	0.01	0	0	E003,7_Enh;E004,7_Enh;E009,7_Enh;E011,2_TssAFlnk;E013,7_Enh;E014,7_Enh;E016,7_Enh;E018,7_Enh;E019,7_Enh;E020,7_Enh;E087,7_Enh;E128,7_Enh	E001,17_EnhW2;E002,17_EnhW2;E003,17_EnhW2;E004,17_EnhW2;E008,17_EnhW2;E010,18_EnhAc;E011,14_EnhA2;E012,17_EnhW2;E013,17_EnhW2;E014,14_EnhA2;E015,15_EnhAF;E016,15_EnhAF;E018,15_EnhAF;E019,15_EnhAF;E020,15_EnhAF;E024,17_EnhW2	E001,H3K4me1_Enh;E003,H3K4me1_Enh;E004,H3K4me1_Enh;E009,H3K4me1_Enh;E010,H3K4me1_Enh;E011,H3K4me1_Enh;E014,H3K4me1_Enh;E015,H3K4me1_Enh;E016,H3K4me1_Enh;E018,H3K4me1_Enh;E019,H3K4me1_Enh;E020,H3K4me1_Enh;E024,H3K4me1_Enh;E025,H3K4me1_Enh;E055,H3K4me1_Enh;E074,H3K4me1_Enh;E086,H3K4me1_Enh;E087,H3K4me1_Enh;E097,H3K4me1_Enh;E103,H3K4me1_Enh;E114,H3K4me1_Enh;E128,H3K4me1_Enh;E003,H3K27ac_Enh;E006,H3K…		.	.	ENSG00000109339.14	0	0	MAPK10	579008	gene
3	8988636	rs11929259	T	C	0.11	0	0	0	0	0	E003,7_Enh;E005,7_Enh;E009,6_EnhG;E010,7_Enh;E011,7_Enh;E012,7_Enh;E015,7_Enh;E016,7_Enh;E018,7_Enh;E023,7_Enh;E024,7_Enh;E025,7_Enh;E049,7_Enh;E053,7_Enh;E063,7_Enh;E072,7_Enh;E083,7_Enh;E088,7_Enh;E089,7_Enh;E090,7_Enh;E092,7_Enh;E120,7_Enh;E121,7_Enh	E001,17_EnhW2;E002,17_EnhW2;E004,17_EnhW2;E005,17_EnhW2;E006,19_DNase;E007,17_EnhW2;E009,15_EnhAF;E010,15_EnhAF;E011,17_EnhW2;E012,15_EnhAF;E013,17_EnhW2;E014,17_EnhW2;E018,17_EnhW2;E019,17_EnhW2;E020,17_EnhW2;E023,17_EnhW2;E024,17_EnhW2;E025,17_EnhW2;E049,19_DNase;E053,17_EnhW2;E054,17_EnhW2;E063,15_EnhAF;E067,15_EnhAF;E068,17_EnhW2;E069,15_EnhAF;E070,17_EnhW2;E071,17_EnhW2;E072,14_EnhA2;E073,17…	E001,H3K4me1_Enh;E003,H3K4me1_Enh;E005,H3K4me1_Enh;E006,H3K4me1_Enh;E009,H3K4me1_Enh;E010,H3K4me1_Enh;E011,H3K4me1_Enh;E012,H3K4me1_Enh;E013,H3K4me1_Enh;E014,H3K4me1_Enh;E015,H3K4me1_Enh;E016,H3K4me1_Enh;E018,H3K4me1_Enh;E019,H3K4me1_Enh;E020,H3K4me1_Enh;E022,H3K4me1_Enh;E023,H3K4me1_Enh;E024,H3K4me1_Enh;E025,H3K4me1_Enh;E026,H3K4me1_Enh;E049,H3K4me1_Enh;E052,H3K4me1_Enh;E053,H3K4me1_Enh;E056,H3K…	E005;E083	.	Foxa_known4;GR_known10;GR_known9;HDAC2_disc2;HDAC2_disc6;STAT_known11;YY1_disc2;p300_disc3	ENSG00000196220.10	0	0	SRGAP3	382462	gene
6	100404303	rs3798513	A	C	0.01	0.12	0.2	0.08	1	1	E004,1_TssA	E121,19_DNase	E020,H3K4me1_Enh;E055,H3K4me1_Enh;E087,H3K4me1_Enh;E121,H3K4me1_Enh	E120;E121	.	CTCF_disc1;Sox_2	ENSG00000112246.5	0	0	SIM1	79914	gene
3	73493449	rs4277628	C	T	0.24	0.53	0.68	0.47	0	0	E004,7_Enh;E005,7_Enh;E006,7_Enh;E013,7_Enh;E023,7_Enh;E025,7_Enh;E026,7_Enh;E027,7_Enh;E054,7_Enh;E065,7_Enh;E070,7_Enh;E076,7_Enh;E080,7_Enh;E083,7_Enh;E090,7_Enh;E095,7_Enh;E097,7_Enh;E098,7_Enh;E100,7_Enh;E104,7_Enh;E105,7_Enh;E107,7_Enh;E108,7_Enh;E111,7_Enh;E113,7_Enh;E121,7_Enh;E125,7_Enh;E126,7_Enh	E004,17_EnhW2;E006,17_EnhW2;E013,17_EnhW2;E023,14_EnhA2;E025,9_TxReg;E026,17_EnhW2;E049,17_EnhW2;E052,17_EnhW2;E055,17_EnhW2;E063,17_EnhW2;E076,15_EnhAF;E083,15_EnhAF;E088,12_TxEnhW;E089,17_EnhW2;E090,17_EnhW2;E095,17_EnhW2;E096,17_EnhW2;E097,15_EnhAF;E099,17_EnhW2;E103,17_EnhW2;E104,18_EnhAc;E105,17_EnhW2;E107,17_EnhW2;E108,17_EnhW2;E111,16_EnhW1;E120,17_EnhW2;E121,17_EnhW2;E125,17_EnhW2;E126,17…	E001,H3K4me1_Enh;E004,H3K4me1_Enh;E005,H3K4me1_Enh;E006,H3K4me1_Enh;E011,H3K4me1_Enh;E013,H3K4me1_Enh;E014,H3K4me1_Enh;E015,H3K4me1_Enh;E016,H3K4me1_Enh;E017,H3K4me1_Enh;E018,H3K4me1_Enh;E020,H3K4me1_Enh;E023,H3K4me1_Enh;E024,H3K4me1_Enh;E025,H3K4me1_Enh;E026,H3K4me1_Enh;E027,H3K4me1_Enh;E049,H3K4me1_Enh;E052,H3K4me1_Enh;E053,H3K4me1_Enh;E054,H3K4me1_Enh;E055,H3K4me1_Enh;E056,H3K4me1_Enh;E063,H3K…		ECC-1,ERALPHA_A,HudsonAlpha,Estradiol_10nM;ECC-1,ERALPHA_A,HudsonAlpha,Genistein_100nM	AP-1_known1;Brachyury_1;ERalpha-a_disc4;Nrf-2_3	ENSG00000121440.10	0	0	PDZRN3	242507	gene
6	57509347	rs3805793	G	C					0	0	E004,7_Enh;E053,7_Enh		E012,H3K27ac_Enh;E020,H3K27ac_Enh;E019,H3K4me1_Enh;E020,H3K4me1_Enh;E024,H3K4me1_Enh;E053,H3K4me1_Enh;E066,H3K9ac_Pro		.	Foxj1_1;HNF1_5	ENSG00000146143.12	0	0	PRIM2	332044	gene
16	77419392	rs2840102	C	A	0.44	0.54	0.21	0.71	0	0	E005,6_EnhG;E027,7_Enh;E069,7_Enh;E074,7_Enh	E005,14_EnhA2;E006,18_EnhAc;E067,17_EnhW2;E068,17_EnhW2;E071,17_EnhW2;E072,17_EnhW2;E074,17_EnhW2;E099,18_EnhAc	E003,H3K9ac_Pro;E005,H3K9ac_Pro;E006,H3K9ac_Pro;E005,H3K27ac_Enh;E011,H3K27ac_Enh;E067,H3K27ac_Enh;E069,H3K27ac_Enh;E074,H3K27ac_Enh;E005,H3K4me1_Enh;E012,H3K4me1_Enh;E027,H3K4me1_Enh;E063,H3K4me1_Enh;E067,H3K4me1_Enh;E069,H3K4me1_Enh;E071,H3K4me1_Enh;E072,H3K4me1_Enh;E074,H3K4me1_Enh;E079,H3K4me1_Enh;E088,H3K4me1_Enh;E118,H3K4me1_Enh;E096,H3K4me3_Pro		.	TBX5_1;VDR_2;VDR_4	ENSG00000140873.11	0	0	ADAMTS18	159987	gene
16	77419428	rs2162954	T	A	0.46	0.54	0.21	0.71	0	0	E005,6_EnhG;E027,7_Enh;E069,7_Enh;E074,7_Enh	E005,14_EnhA2;E006,18_EnhAc;E067,17_EnhW2;E068,17_EnhW2;E071,17_EnhW2;E072,17_EnhW2;E074,17_EnhW2;E099,18_EnhAc	E003,H3K9ac_Pro;E005,H3K9ac_Pro;E006,H3K9ac_Pro;E005,H3K27ac_Enh;E011,H3K27ac_Enh;E067,H3K27ac_Enh;E069,H3K27ac_Enh;E074,H3K27ac_Enh;E005,H3K4me1_Enh;E012,H3K4me1_Enh;E027,H3K4me1_Enh;E063,H3K4me1_Enh;E067,H3K4me1_Enh;E069,H3K4me1_Enh;E071,H3K4me1_Enh;E072,H3K4me1_Enh;E074,H3K4me1_Enh;E079,H3K4me1_Enh;E088,H3K4me1_Enh;E118,H3K4me1_Enh;E096,H3K4me3_Pro		.	p300_disc7	ENSG00000140873.11	0	0	ADAMTS18	159987	gene
6	12810705	rs7760286	A	G	0.52	0.31	0.02	0.34	0	0	E005,7_Enh		E024,H3K4me1_Enh;E068,H3K4me1_Enh;E067,H3K27ac_Enh;E068,H3K27ac_Enh;E072,H3K27ac_Enh;E073,H3K27ac_Enh;E098,H3K4me3_Pro		.	CEBPB_disc2;LBP-1_3;Maf_known1	ENSG00000112137.11	0	0	PHACTR1	573679	gene
18	36338529	rs2847515	C	T	0.2	0.55	0.69	0.74	0	0	E005,7_Enh;E006,7_Enh;E012,7_Enh;E014,7_Enh;E022,7_Enh;E024,7_Enh;E025,7_Enh;E027,7_Enh;E066,7_Enh;E083,7_Enh;E084,7_Enh;E085,7_Enh;E086,7_Enh;E090,7_Enh;E095,7_Enh;E098,7_Enh;E106,7_Enh;E107,7_Enh;E108,7_Enh;E118,7_Enh	E005,14_EnhA2;E006,17_EnhW2;E063,17_EnhW2;E073,17_EnhW2;E075,17_EnhW2;E077,17_EnhW2;E083,10_TxEnh5;E084,17_EnhW2;E085,17_EnhW2;E092,17_EnhW2;E095,15_EnhAF;E096,17_EnhW2;E101,16_EnhW1;E103,17_EnhW2;E104,15_EnhAF;E105,14_EnhA2;E107,14_EnhA2;E108,14_EnhA2;E111,17_EnhW2	E005,H3K4me1_Enh;E006,H3K4me1_Enh;E012,H3K4me1_Enh;E014,H3K4me1_Enh;E015,H3K4me1_Enh;E016,H3K4me1_Enh;E017,H3K4me1_Enh;E019,H3K4me1_Enh;E020,H3K4me1_Enh;E022,H3K4me1_Enh;E024,H3K4me1_Enh;E025,H3K4me1_Enh;E027,H3K4me1_Enh;E028,H3K4me1_Enh;E049,H3K4me1_Enh;E055,H3K4me1_Enh;E065,H3K4me1_Enh;E066,H3K4me1_Enh;E083,H3K4me1_Enh;E084,H3K4me1_Enh;E085,H3K4me1_Enh;E086,H3K4me1_Enh;E088,H3K4me1_Enh;E089,H3K…	E081;E083;E121	.	CTCF_disc10;SETDB1_disc1;TCF12_disc5	ENSG00000134775.9	0	0	FHOD3	482341	gene
18	36338602	rs2670671	A	C	0.81	0.68	0.76	0.76	0	0	E005,7_Enh;E006,7_Enh;E012,7_Enh;E014,7_Enh;E022,7_Enh;E024,7_Enh;E025,7_Enh;E027,7_Enh;E066,7_Enh;E083,7_Enh;E084,7_Enh;E085,7_Enh;E086,7_Enh;E090,7_Enh;E095,7_Enh;E098,7_Enh;E106,7_Enh;E107,7_Enh;E108,7_Enh;E118,7_Enh	E005,14_EnhA2;E006,17_EnhW2;E063,17_EnhW2;E073,17_EnhW2;E075,17_EnhW2;E077,17_EnhW2;E083,10_TxEnh5;E084,17_EnhW2;E085,17_EnhW2;E092,17_EnhW2;E095,15_EnhAF;E096,17_EnhW2;E101,16_EnhW1;E103,17_EnhW2;E104,15_EnhAF;E105,14_EnhA2;E107,14_EnhA2;E108,14_EnhA2;E111,17_EnhW2	E005,H3K4me1_Enh;E006,H3K4me1_Enh;E012,H3K4me1_Enh;E014,H3K4me1_Enh;E015,H3K4me1_Enh;E016,H3K4me1_Enh;E017,H3K4me1_Enh;E019,H3K4me1_Enh;E020,H3K4me1_Enh;E022,H3K4me1_Enh;E024,H3K4me1_Enh;E025,H3K4me1_Enh;E027,H3K4me1_Enh;E028,H3K4me1_Enh;E049,H3K4me1_Enh;E055,H3K4me1_Enh;E065,H3K4me1_Enh;E066,H3K4me1_Enh;E083,H3K4me1_Enh;E084,H3K4me1_Enh;E085,H3K4me1_Enh;E086,H3K4me1_Enh;E088,H3K4me1_Enh;E089,H3K…	E081;E083;E126	.	CAC-binding-protein;Irf_disc3;Irf_known1;STAT_known1;STAT_known2	ENSG00000134775.9	0	0	FHOD3	482341	gene
18	36328269	rs677347	T	G	0.84	0.68	0.73	0.76	0	0	E005,7_Enh;E006,7_Enh;E028,7_Enh;E057,7_Enh;E083,7_Enh;E089,7_Enh;E090,7_Enh;E095,7_Enh;E104,7_Enh;E105,7_Enh;E107,7_Enh;E116,7_Enh;E121,7_Enh	E065,18_EnhAc;E083,9_TxReg;E095,15_EnhAF;E096,18_EnhAc;E097,18_EnhAc;E100,18_EnhAc;E104,15_EnhAF;E105,10_TxEnh5;E121,17_EnhW2	E003,H3K4me1_Enh;E005,H3K4me1_Enh;E006,H3K4me1_Enh;E007,H3K4me1_Enh;E012,H3K4me1_Enh;E014,H3K4me1_Enh;E016,H3K4me1_Enh;E024,H3K4me1_Enh;E025,H3K4me1_Enh;E027,H3K4me1_Enh;E028,H3K4me1_Enh;E049,H3K4me1_Enh;E055,H3K4me1_Enh;E057,H3K4me1_Enh;E083,H3K4me1_Enh;E089,H3K4me1_Enh;E090,H3K4me1_Enh;E092,H3K4me1_Enh;E095,H3K4me1_Enh;E097,H3K4me1_Enh;E100,H3K4me1_Enh;E101,H3K4me1_Enh;E102,H3K4me1_Enh;E104,H3K…	E083	.	NF-kappaB_known2;NF-kappaB_known3;STAT_known4	ENSG00000134775.9	0	0	FHOD3	482341	gene
18	36328318	rs500871	T	C	0.85	0.67	0.73	0.76	0	0	E005,7_Enh;E006,7_Enh;E028,7_Enh;E057,7_Enh;E083,7_Enh;E089,7_Enh;E090,7_Enh;E095,7_Enh;E104,7_Enh;E105,7_Enh;E107,7_Enh;E116,7_Enh;E121,7_Enh	E065,18_EnhAc;E083,9_TxReg;E095,15_EnhAF;E096,18_EnhAc;E097,18_EnhAc;E100,18_EnhAc;E104,15_EnhAF;E105,10_TxEnh5;E121,17_EnhW2	E003,H3K4me1_Enh;E005,H3K4me1_Enh;E006,H3K4me1_Enh;E007,H3K4me1_Enh;E012,H3K4me1_Enh;E014,H3K4me1_Enh;E016,H3K4me1_Enh;E024,H3K4me1_Enh;E025,H3K4me1_Enh;E027,H3K4me1_Enh;E028,H3K4me1_Enh;E049,H3K4me1_Enh;E055,H3K4me1_Enh;E057,H3K4me1_Enh;E083,H3K4me1_Enh;E089,H3K4me1_Enh;E090,H3K4me1_Enh;E092,H3K4me1_Enh;E095,H3K4me1_Enh;E097,H3K4me1_Enh;E100,H3K4me1_Enh;E101,H3K4me1_Enh;E102,H3K4me1_Enh;E104,H3K…	E083;E116	.	E2F_disc3;E2F_known3;ERalpha-a_disc4;STAT_disc7;Sin3Ak-20_disc6;THAP1_disc2;UF1H3BETA	ENSG00000134775.9	0	0	FHOD3	482341	gene
9	117349259	rs7862181	A	T	0.47	0.31	0.06	0.37	0	0	E005,7_Enh;E008,7_Enh;E013,7_Enh;E016,7_Enh;E068,7_Enh	E002,17_EnhW2;E008,17_EnhW2;E011,17_EnhW2;E012,17_EnhW2;E020,17_EnhW2;E073,17_EnhW2	E001,H3K4me1_Enh;E003,H3K4me1_Enh;E007,H3K4me1_Enh;E008,H3K4me1_Enh;E011,H3K4me1_Enh;E012,H3K4me1_Enh;E013,H3K4me1_Enh;E016,H3K4me1_Enh;E018,H3K4me1_Enh;E020,H3K4me1_Enh;E024,H3K4me1_Enh;E067,H3K4me1_Enh;E068,H3K4me1_Enh;E069,H3K4me1_Enh;E071,H3K4me1_Enh;E073,H3K4me1_Enh;E074,H3K4me1_Enh;E013,H3K27ac_Enh;E020,H3K27ac_Enh;E014,H3K9ac_Pro;E027,H3K9ac_Pro;E103,H3K9ac_Pro		.	Foxa_disc4;GR_known1;STAT_disc5	ENSG00000148219.12	0	0	ASTN2	996814	gene
10	132625974	rs7091957	T	C	0.13	0.47	0.81	0.49	0	0	E005,7_Enh;E009,7_Enh;E010,7_Enh;E022,7_Enh;E036,7_Enh;E050,7_Enh;E051,7_Enh;E055,7_Enh;E056,7_Enh;E068,7_Enh;E069,7_Enh;E071,7_Enh;E072,7_Enh;E076,7_Enh;E080,7_Enh;E082,7_Enh;E083,7_Enh;E088,7_Enh;E089,7_Enh;E090,7_Enh;E091,7_Enh;E092,6_EnhG;E094,7_Enh;E095,7_Enh;E096,7_Enh;E097,7_Enh;E098,7_Enh;E103,7_Enh;E104,7_Enh;E105,7_Enh;E107,7_Enh;E108,7_Enh;E110,7_Enh;E111,7_Enh;E113,7_Enh	E005,17_EnhW2;E007,17_EnhW2;E009,17_EnhW2;E010,18_EnhAc;E013,17_EnhW2;E030,12_TxEnhW;E059,17_EnhW2;E063,17_EnhW2;E065,17_EnhW2;E068,10_TxEnh5;E069,10_TxEnh5;E070,17_EnhW2;E071,12_TxEnhW;E072,10_TxEnh5;E074,12_TxEnhW;E075,12_TxEnhW;E076,17_EnhW2;E079,17_EnhW2;E080,10_TxEnh5;E083,9_TxReg;E084,17_EnhW2;E085,17_EnhW2;E086,17_EnhW2;E087,17_EnhW2;E088,17_EnhW2;E089,18_EnhAc;E090,18_EnhAc;E091,17_EnhW2;…	E001,H3K4me1_Enh;E002,H3K4me1_Enh;E003,H3K4me1_Enh;E005,H3K4me1_Enh;E006,H3K4me1_Enh;E007,H3K4me1_Enh;E009,H3K4me1_Enh;E010,H3K4me1_Enh;E011,H3K4me1_Enh;E012,H3K4me1_Enh;E013,H3K4me1_Enh;E015,H3K4me1_Enh;E018,H3K4me1_Enh;E020,H3K4me1_Enh;E021,H3K4me1_Enh;E022,H3K4me1_Enh;E024,H3K4me1_Enh;E025,H3K4me1_Enh;E027,H3K4me1_Enh;E029,H3K4me1_Enh;E030,H3K4me1_Enh;E032,H3K4me1_Enh;E034,H3K4me1_Enh;E035,H3K…		.	E2A_5;E2F_disc5;Egr-1_disc7;Mef2_known5	ENSG00000068383.13	0	0	INPP5A	245660	gene
1	42164693	rs2071499	G	A	0.09	0.63	0.44	0.62	1	1	E005,7_Enh;E011,7_Enh;E022,7_Enh;E058,7_Enh;E063,12_EnhBiv;E075,2_TssAFlnk;E077,7_Enh;E080,12_EnhBiv;E084,2_TssAFlnk;E085,7_Enh;E089,7_Enh;E090,7_Enh;E091,7_Enh;E095,7_Enh;E096,7_Enh;E098,7_Enh;E101,2_TssAFlnk;E102,2_TssAFlnk;E103,1_TssA;E104,7_Enh;E107,7_Enh;E109,7_Enh;E110,7_Enh;E113,7_Enh;E114,7_Enh;E117,7_Enh;E118,11_BivFlnk	E005,14_EnhA2;E056,23_PromBiv;E063,17_EnhW2;E066,17_EnhW2;E075,13_EnhA1;E077,13_EnhA1;E078,17_EnhW2;E079,17_EnhW2;E080,15_EnhAF;E084,13_EnhA1;E085,13_EnhA1;E089,18_EnhAc;E090,17_EnhW2;E091,13_EnhA1;E092,17_EnhW2;E094,17_EnhW2;E095,15_EnhAF;E096,17_EnhW2;E097,17_EnhW2;E098,15_EnhAF;E099,15_EnhAF;E101,13_EnhA1;E102,13_EnhA1;E103,15_EnhAF;E105,17_EnhW2;E106,13_EnhA1;E107,17_EnhW2;E108,17_EnhW2;E109,…	E001,H3K4me1_Enh;E002,H3K4me1_Enh;E003,H3K4me1_Enh;E005,H3K4me1_Enh;E006,H3K4me1_Enh;E011,H3K4me1_Enh;E012,H3K4me1_Enh;E013,H3K4me1_Enh;E015,H3K4me1_Enh;E022,H3K4me1_Enh;E024,H3K4me1_Enh;E027,H3K4me1_Enh;E055,H3K4me1_Enh;E056,H3K4me1_Enh;E057,H3K4me1_Enh;E058,H3K4me1_Enh;E059,H3K4me1_Enh;E063,H3K4me1_Enh;E066,H3K4me1_Enh;E071,H3K4me1_Enh;E075,H3K4me1_Enh;E077,H3K4me1_Enh;E080,H3K4me1_Enh;E083,H3K…	E084;E109	.	ERalpha-a_disc4;EWSR1-FLI1;HNF4_known4	ENSG00000197273.3	0	0	GUCA2A	2027	gene
18	59514512	rs4558500	C	T	0.89	0.69	0.98	0.66	1	1	E005,7_Enh;E012,7_Enh;E013,7_Enh;E017,7_Enh;E023,7_Enh;E025,7_Enh;E026,2_TssAFlnk;E049,2_TssAFlnk;E052,7_Enh;E055,2_TssAFlnk;E056,7_Enh;E058,7_Enh;E063,12_EnhBiv;E065,7_Enh;E076,7_Enh;E077,12_EnhBiv;E080,7_Enh;E081,7_Enh;E082,7_Enh;E083,7_Enh;E088,7_Enh;E089,7_Enh;E090,12_EnhBiv;E095,7_Enh;E097,7_Enh;E100,12_EnhBiv;E103,7_Enh;E110,12_EnhBiv;E117,12_EnhBiv;E118,12_EnhBiv;E121,7_Enh;E122,7_Enh;E125…	E005,16_EnhW1;E006,15_EnhAF;E007,17_EnhW2;E009,19_DNase;E010,19_DNase;E011,19_DNase;E012,14_EnhA2;E013,4_PromD2;E014,19_DNase;E015,19_DNase;E016,19_DNase;E017,13_EnhA1;E018,19_DNase;E019,19_DNase;E022,19_DNase;E023,13_EnhA1;E024,19_DNase;E025,13_EnhA1;E026,13_EnhA1;E027,17_EnhW2;E028,17_EnhW2;E042,19_DNase;E049,13_EnhA1;E052,14_EnhA2;E053,19_DNase;E054,16_EnhW1;E055,13_EnhA1;E056,14_EnhA2;E057,19…	E001,H3K4me1_Enh;E002,H3K4me1_Enh;E005,H3K4me1_Enh;E006,H3K4me1_Enh;E011,H3K4me1_Enh;E012,H3K4me1_Enh;E013,H3K4me1_Enh;E017,H3K4me1_Enh;E020,H3K4me1_Enh;E023,H3K4me1_Enh;E025,H3K4me1_Enh;E026,H3K4me1_Enh;E027,H3K4me1_Enh;E028,H3K4me1_Enh;E049,H3K4me1_Enh;E052,H3K4me1_Enh;E055,H3K4me1_Enh;E056,H3K4me1_Enh;E058,H3K4me1_Enh;E063,H3K4me1_Enh;E065,H3K4me1_Enh;E066,H3K4me1_Enh;E068,H3K4me1_Enh;E071,H3K…	E006;E017;E055;E056;E080;E081;E082;E083;E086;E088;E089;E090;E097;E098;E100;E117;E118;E120;E121;E122;E125;E126;E128	HUVEC,CFOS,UCD,None;HeLa-S3,MAX,Stanford,None	.	ENSG00000183287.7	0	0	CCBE1	266440	gene
18	59514049	rs9953900	C	T	0.8	0.71	0.98	0.7	0	0	E005,7_Enh;E013,7_Enh;E017,7_Enh;E023,2_TssAFlnk;E025,7_Enh;E026,7_Enh;E049,2_TssAFlnk;E055,7_Enh;E056,7_Enh;E058,7_Enh;E065,7_Enh;E076,7_Enh;E081,2_TssAFlnk;E082,7_Enh;E083,7_Enh;E088,7_Enh;E089,7_Enh;E095,7_Enh;E097,7_Enh;E100,12_EnhBiv;E103,7_Enh;E104,7_Enh;E118,12_EnhBiv;E121,7_Enh;E122,7_Enh;E125,7_Enh;E126,7_Enh;E128,7_Enh;E129,7_Enh	E005,16_EnhW1;E006,12_TxEnhW;E012,17_EnhW2;E017,10_TxEnh5;E023,9_TxReg;E025,10_TxEnh5;E026,9_TxReg;E028,17_EnhW2;E049,9_TxReg;E052,12_TxEnhW;E055,10_TxEnh5;E056,10_TxEnh5;E059,17_EnhW2;E063,17_EnhW2;E065,12_TxEnhW;E076,10_TxEnh5;E080,12_TxEnhW;E081,13_EnhA1;E082,17_EnhW2;E083,9_TxReg;E086,17_EnhW2;E088,9_TxReg;E090,17_EnhW2;E095,17_EnhW2;E096,12_TxEnhW;E097,10_TxEnh5;E101,17_EnhW2;E103,12_TxEnhW;…	E001,H3K4me1_Enh;E002,H3K4me1_Enh;E005,H3K4me1_Enh;E006,H3K4me1_Enh;E013,H3K4me1_Enh;E017,H3K4me1_Enh;E020,H3K4me1_Enh;E023,H3K4me1_Enh;E025,H3K4me1_Enh;E026,H3K4me1_Enh;E049,H3K4me1_Enh;E052,H3K4me1_Enh;E055,H3K4me1_Enh;E056,H3K4me1_Enh;E058,H3K4me1_Enh;E063,H3K4me1_Enh;E065,H3K4me1_Enh;E066,H3K4me1_Enh;E068,H3K4me1_Enh;E076,H3K4me1_Enh;E077,H3K4me1_Enh;E078,H3K4me1_Enh;E079,H3K4me1_Enh;E080,H3K…	E081	.	.	ENSG00000183287.7	0	0	CCBE1	266440	gene
18	59515414	rs1557406	C	G	0.88	0.67	0.8	0.64	0	0	E005,7_Enh;E013,7_Enh;E017,7_Enh;E023,7_Enh;E025,7_Enh;E026,7_Enh;E052,7_Enh;E055,2_TssAFlnk;E056,7_Enh;E063,7_Enh;E076,7_Enh;E080,7_Enh;E081,7_Enh;E083,7_Enh;E085,7_Enh;E088,7_Enh;E097,7_Enh;E103,7_Enh;E117,7_Enh;E118,7_Enh;E126,7_Enh;E128,7_Enh;E129,7_Enh	E017,15_EnhAF;E023,10_TxEnh5;E025,10_TxEnh5;E026,12_TxEnhW;E049,17_EnhW2;E052,12_TxEnhW;E055,10_TxEnh5;E056,10_TxEnh5;E061,17_EnhW2;E066,17_EnhW2;E076,10_TxEnh5;E078,17_EnhW2;E081,15_EnhAF;E083,10_TxEnh5;E086,17_EnhW2;E088,12_TxEnhW;E091,17_EnhW2;E095,17_EnhW2;E097,10_TxEnh5;E103,10_TxEnh5;E104,12_TxEnhW;E105,18_EnhAc;E111,18_EnhAc;E120,12_TxEnhW;E125,17_EnhW2;E126,12_TxEnhW;E128,17_EnhW2;E129,10…	E001,H3K4me1_Enh;E002,H3K4me1_Enh;E003,H3K4me1_Enh;E005,H3K4me1_Enh;E011,H3K4me1_Enh;E013,H3K4me1_Enh;E017,H3K4me1_Enh;E020,H3K4me1_Enh;E023,H3K4me1_Enh;E025,H3K4me1_Enh;E026,H3K4me1_Enh;E027,H3K4me1_Enh;E028,H3K4me1_Enh;E049,H3K4me1_Enh;E052,H3K4me1_Enh;E055,H3K4me1_Enh;E056,H3K4me1_Enh;E063,H3K4me1_Enh;E065,H3K4me1_Enh;E066,H3K4me1_Enh;E071,H3K4me1_Enh;E076,H3K4me1_Enh;E077,H3K4me1_Enh;E078,H3K…	E083;E097	.	ERalpha-a_disc2;GCNF;GR_known4;LBP-1_2;LRH1;SF1	ENSG00000183287.7	0	0	CCBE1	266440	gene
3	25412065	rs7615918	C	T	0.92	0.86	1	0.81	0	0	E005,7_Enh;E013,7_Enh;E077,7_Enh;E084,7_Enh;E085,7_Enh;E110,7_Enh;E114,7_Enh;E118,7_Enh;E122,7_Enh	E001,17_EnhW2;E005,19_DNase;E011,16_EnhW1;E013,19_DNase;E077,18_EnhAc;E084,13_EnhA1;E085,13_EnhA1;E090,18_EnhAc;E092,18_EnhAc;E102,15_EnhAF;E109,18_EnhAc;E110,15_EnhAF;E114,13_EnhA1;E117,15_EnhAF;E118,18_EnhAc	E001,H3K9ac_Pro;E007,H3K9ac_Pro;E114,H3K9ac_Pro;E005,H3K27ac_Enh;E013,H3K27ac_Enh;E084,H3K27ac_Enh;E085,H3K27ac_Enh;E091,H3K27ac_Enh;E114,H3K27ac_Enh;E005,H3K4me1_Enh;E009,H3K4me1_Enh;E010,H3K4me1_Enh;E011,H3K4me1_Enh;E013,H3K4me1_Enh;E015,H3K4me1_Enh;E021,H3K4me1_Enh;E024,H3K4me1_Enh;E026,H3K4me1_Enh;E028,H3K4me1_Enh;E049,H3K4me1_Enh;E052,H3K4me1_Enh;E061,H3K4me1_Enh;E077,H3K4me1_Enh;E084,H3K4me…	E084;E091	.	Dobox4;Pou6f1_2;SIX5_known2	ENSG00000077092.14	0	0	RARB	423600	gene
5	174385530	rs2909716	T	C	0.39	0.04	0.09	0.03	0	0	E005,7_Enh;E023,7_Enh;E025,7_Enh;E126,7_Enh	E023,17_EnhW2;E025,18_EnhAc;E026,17_EnhW2	E005,H3K27ac_Enh;E017,H3K27ac_Enh;E026,H3K27ac_Enh;E099,H3K27ac_Enh;E117,H3K27ac_Enh;E125,H3K27ac_Enh;E129,H3K27ac_Enh;E005,H3K4me1_Enh;E012,H3K4me1_Enh;E013,H3K4me1_Enh;E015,H3K4me1_Enh;E017,H3K4me1_Enh;E023,H3K4me1_Enh;E025,H3K4me1_Enh;E026,H3K4me1_Enh;E049,H3K4me1_Enh;E089,H3K4me1_Enh;E090,H3K4me1_Enh;E092,H3K4me1_Enh;E099,H3K4me1_Enh;E111,H3K4me1_Enh;E117,H3K4me1_Enh;E125,H3K4me1_Enh;E129,H3K…		.	ATF3_disc4;CCNT2_disc2;FXR_2;HNF4_known5;LF-A1;NF-E2_disc4;RXRA_known3;SP1_known1	ENSG00000249306.1	0	0	RP11-267A15.1	196162	no protein, long intergenic non-preotein coding RNA
10	29600320	rs2488683	C	G	0.27	0.37	0.21	0.53	0	0	E005,7_Enh;E025,7_Enh;E027,7_Enh;E028,7_Enh;E049,7_Enh;E055,7_Enh;E057,7_Enh;E058,7_Enh;E065,7_Enh;E076,7_Enh;E083,7_Enh;E090,7_Enh;E095,7_Enh;E097,7_Enh;E100,7_Enh;E103,7_Enh;E107,7_Enh;E108,7_Enh;E111,6_EnhG;E119,7_Enh;E125,7_Enh;E126,7_Enh;E127,7_Enh;E129,7_Enh	E001,19_DNase;E002,19_DNase;E006,17_EnhW2;E011,19_DNase;E017,19_DNase;E023,17_EnhW2;E025,18_EnhAc;E026,17_EnhW2;E027,17_EnhW2;E028,15_EnhAF;E049,17_EnhW2;E052,17_EnhW2;E055,10_TxEnh5;E056,15_EnhAF;E057,15_EnhAF;E058,15_EnhAF;E059,17_EnhW2;E061,19_DNase;E063,17_EnhW2;E065,15_EnhAF;E076,10_TxEnh5;E078,10_TxEnh5;E079,17_EnhW2;E083,10_TxEnh5;E089,17_EnhW2;E090,10_TxEnh5;E095,10_TxEnh5;E096,15_EnhAF;E…	E001,H3K4me1_Enh;E005,H3K4me1_Enh;E006,H3K4me1_Enh;E007,H3K4me1_Enh;E013,H3K4me1_Enh;E017,H3K4me1_Enh;E018,H3K4me1_Enh;E023,H3K4me1_Enh;E025,H3K4me1_Enh;E026,H3K4me1_Enh;E027,H3K4me1_Enh;E028,H3K4me1_Enh;E041,H3K4me1_Enh;E049,H3K4me1_Enh;E052,H3K4me1_Enh;E055,H3K4me1_Enh;E056,H3K4me1_Enh;E057,H3K4me1_Enh;E058,H3K4me1_Enh;E063,H3K4me1_Enh;E065,H3K4me1_Enh;E067,H3K4me1_Enh;E070,H3K4me1_Enh;E076,H3K…	E028;E029;E055;E056;E057;E083;E097;E100;E119;E125;E126;E127;E128	HUVEC,CFOS,UCD,None	.	ENSG00000197321.9	0	0	SVIL	279443	gene
6	25768796	rs1892250	T	C	0.84	0.93	0.98	0.91	0	0	E005,7_Enh;E091,7_Enh		E005,H3K27ac_Enh;E012,H3K27ac_Enh;E091,H3K27ac_Enh;E005,H3K4me1_Enh;E091,H3K4me1_Enh;E096,H3K4me1_Enh;E099,H3K4me3_Pro	E004	.	.	ENSG00000146039.6	0	0	SLC17A4	26492	gene
6	33988695	rs4256433	T	C	0.88	0.76	0.51	0.69	0	0	E006,12_EnhBiv;E011,7_Enh;E012,7_Enh;E013,7_Enh;E022,7_Enh;E066,7_Enh;E075,7_Enh;E084,7_Enh;E085,7_Enh;E088,7_Enh;E089,12_EnhBiv;E090,7_Enh;E091,7_Enh;E094,7_Enh;E101,7_Enh;E102,7_Enh;E110,7_Enh;E118,2_TssAFlnk	E005,17_EnhW2;E007,17_EnhW2;E011,19_DNase;E012,17_EnhW2;E066,18_EnhAc;E075,15_EnhAF;E077,17_EnhW2;E079,19_DNase;E080,17_EnhW2;E084,14_EnhA2;E085,14_EnhA2;E086,17_EnhW2;E087,17_EnhW2;E088,18_EnhAc;E089,15_EnhAF;E090,15_EnhAF;E091,17_EnhW2;E092,17_EnhW2;E094,17_EnhW2;E098,19_DNase;E101,17_EnhW2;E102,16_EnhW1;E109,17_EnhW2;E110,15_EnhAF;E113,19_DNase;E118,14_EnhA2	E001,H3K4me1_Enh;E006,H3K4me1_Enh;E007,H3K4me1_Enh;E011,H3K4me1_Enh;E012,H3K4me1_Enh;E013,H3K4me1_Enh;E015,H3K4me1_Enh;E022,H3K4me1_Enh;E024,H3K4me1_Enh;E056,H3K4me1_Enh;E066,H3K4me1_Enh;E075,H3K4me1_Enh;E084,H3K4me1_Enh;E085,H3K4me1_Enh;E088,H3K4me1_Enh;E089,H3K4me1_Enh;E090,H3K4me1_Enh;E091,H3K4me1_Enh;E094,H3K4me1_Enh;E096,H3K4me1_Enh;E101,H3K4me1_Enh;E102,H3K4me1_Enh;E105,H3K4me1_Enh;E110,H3K…	E118	.	.	ENSG00000221697.1	3	11276	MIR1275	80	microRNA
3	37926170	rs9868023	G	A	0.13	0.02	0	0.03	0	0	E006,7_Enh;E007,7_Enh;E013,7_Enh;E017,7_Enh;E021,7_Enh;E027,7_Enh;E030,7_Enh;E035,7_Enh;E050,7_Enh;E051,7_Enh;E065,7_Enh;E067,7_Enh;E068,7_Enh;E069,7_Enh;E071,7_Enh;E072,7_Enh;E073,7_Enh;E083,7_Enh;E086,7_Enh;E088,7_Enh;E091,7_Enh;E093,7_Enh;E096,7_Enh;E104,7_Enh;E107,7_Enh;E111,7_Enh;E118,7_Enh;E121,7_Enh	E005,12_TxEnhW;E006,12_TxEnhW;E012,17_EnhW2;E035,17_EnhW2;E036,17_EnhW2;E050,12_TxEnhW;E051,10_TxEnh5;E054,12_TxEnhW;E055,12_TxEnhW;E059,12_TxEnhW;E065,12_TxEnhW;E067,10_TxEnh5;E068,10_TxEnh5;E069,10_TxEnh5;E071,10_TxEnh5;E072,10_TxEnh5;E073,10_TxEnh5;E074,10_TxEnh5;E081,17_EnhW2;E083,12_TxEnhW;E086,12_TxEnhW;E087,12_TxEnhW;E088,10_TxEnh5;E096,12_TxEnhW;E097,12_TxEnhW;E100,12_TxEnhW;E103,12_TxEnh…	E005,H3K4me1_Enh;E006,H3K4me1_Enh;E007,H3K4me1_Enh;E009,H3K4me1_Enh;E010,H3K4me1_Enh;E011,H3K4me1_Enh;E012,H3K4me1_Enh;E013,H3K4me1_Enh;E016,H3K4me1_Enh;E017,H3K4me1_Enh;E021,H3K4me1_Enh;E025,H3K4me1_Enh;E027,H3K4me1_Enh;E028,H3K4me1_Enh;E030,H3K4me1_Enh;E035,H3K4me1_Enh;E038,H3K4me1_Enh;E049,H3K4me1_Enh;E050,H3K4me1_Enh;E051,H3K4me1_Enh;E055,H3K4me1_Enh;E056,H3K4me1_Enh;E058,H3K4me1_Enh;E059,H3K…		.	Pax-5_disc4;TAL1_disc2;TATA_disc7	ENSG00000144677.10	0	0	CTDSPL	122509	gene
20	62674584	rs6062400	G	A	0.1	0.12	0.14	0.14	0	0	E006,7_Enh;E013,7_Enh;E029,7_Enh;E055,12_EnhBiv;E089,12_EnhBiv;E124,7_Enh	E030,17_EnhW2;E124,18_EnhAc	E006,H3K4me1_Enh;E012,H3K4me1_Enh;E013,H3K4me1_Enh;E017,H3K4me1_Enh;E022,H3K4me1_Enh;E029,H3K4me1_Enh;E030,H3K4me1_Enh;E031,H3K4me1_Enh;E046,H3K4me1_Enh;E049,H3K4me1_Enh;E052,H3K4me1_Enh;E055,H3K4me1_Enh;E056,H3K4me1_Enh;E075,H3K4me1_Enh;E079,H3K4me1_Enh;E089,H3K4me1_Enh;E090,H3K4me1_Enh;E091,H3K4me1_Enh;E092,H3K4me1_Enh;E094,H3K4me1_Enh;E096,H3K4me1_Enh;E099,H3K4me1_Enh;E105,H3K4me1_Enh;E108,H3K…	E029;E100;E124	.	.	ENSG00000101187.11	0	0	SLCO4A1	43340	gene
6	139538405	rs12665242	A	G	0.03	0.15	0.11	0.14	0	0	E006,7_Enh;E013,7_Enh;E098,7_Enh;E118,7_Enh;E122,7_Enh	E079,17_EnhW2;E122,13_EnhA1	E001,H3K4me1_Enh;E002,H3K4me1_Enh;E004,H3K4me1_Enh;E006,H3K4me1_Enh;E011,H3K4me1_Enh;E013,H3K4me1_Enh;E014,H3K4me1_Enh;E017,H3K4me1_Enh;E018,H3K4me1_Enh;E020,H3K4me1_Enh;E030,H3K4me1_Enh;E034,H3K4me1_Enh;E037,H3K4me1_Enh;E038,H3K4me1_Enh;E040,H3K4me1_Enh;E042,H3K4me1_Enh;E043,H3K4me1_Enh;E047,H3K4me1_Enh;E055,H3K4me1_Enh;E058,H3K4me1_Enh;E065,H3K4me1_Enh;E078,H3K4me1_Enh;E079,H3K4me1_Enh;E084,H3K…	E004;E006;E081;E122	.	Eomes;Myb_2;Myb_3;Tgif1_2	ENSG00000238099.1	5	65349	RP11-12A2.3	5601	no protein, long intergenic non-preotein coding RNA
11	65453278	rs1784859	C	T	0.59	0.52	0.41	0.31	0	0	E006,7_Enh;E017,7_Enh;E023,7_Enh;E025,2_TssAFlnk;E026,7_Enh;E028,7_Enh;E029,7_Enh;E030,12_EnhBiv;E052,7_Enh;E055,1_TssA;E056,2_TssAFlnk;E057,7_Enh;E058,7_Enh;E079,7_Enh;E080,7_Enh;E089,7_Enh;E090,7_Enh;E091,6_EnhG;E095,7_Enh;E100,7_Enh;E107,7_Enh;E109,7_Enh;E114,7_Enh;E117,7_Enh;E118,7_Enh;E119,7_Enh;E120,7_Enh;E121,7_Enh;E124,2_TssAFlnk;E125,7_Enh;E126,7_Enh;E127,7_Enh;E128,7_Enh;E129,7_Enh	E001,19_DNase;E002,19_DNase;E004,19_DNase;E005,18_EnhAc;E006,15_EnhAF;E009,19_DNase;E010,19_DNase;E011,19_DNase;E012,19_DNase;E013,18_EnhAc;E017,15_EnhAF;E022,19_DNase;E023,13_EnhA1;E025,13_EnhA1;E026,13_EnhA1;E027,14_EnhA2;E028,15_EnhAF;E029,13_EnhA1;E030,14_EnhA2;E031,14_EnhA2;E032,19_DNase;E033,17_EnhW2;E034,19_DNase;E035,17_EnhW2;E036,15_EnhAF;E037,22_PromP;E038,19_DNase;E039,19_DNase;E040,19…	E005,H3K4me1_Enh;E006,H3K4me1_Enh;E009,H3K4me1_Enh;E013,H3K4me1_Enh;E017,H3K4me1_Enh;E023,H3K4me1_Enh;E025,H3K4me1_Enh;E026,H3K4me1_Enh;E027,H3K4me1_Enh;E028,H3K4me1_Enh;E029,H3K4me1_Enh;E030,H3K4me1_Enh;E031,H3K4me1_Enh;E039,H3K4me1_Enh;E040,H3K4me1_Enh;E041,H3K4me1_Enh;E042,H3K4me1_Enh;E046,H3K4me1_Enh;E048,H3K4me1_Enh;E049,H3K4me1_Enh;E050,H3K4me1_Enh;E051,H3K4me1_Enh;E052,H3K4me1_Enh;E055,H3K…	E006;E017;E028;E029;E034;E055;E056;E057;E059;E080;E083;E089;E090;E094;E097;E098;E100;E114;E117;E119;E120;E121;E124;E125;E126;E127;E128	HeLa-S3,CEBPB,Stanford,None;HeLa-S3,CJUN,Stanford,None;HeLa-S3,GTF2F1,Stanford,None;HeLa-S3,JUND,Stanford,None;HeLa-S3,P300,Stanford,None;HeLa-S3,POL2,HudsonAlpha,None;HeLa-S3,RAD21,Stanford,None;HeLa-S3,STAT3,Stanford,None;HeLa-S3,TBP,Stanford,None;MCF10A-Er-Src,STAT3,Harvard(Weissman),TAM_1uM_36hr	Sox_15;Sox_9	ENSG00000173727.7	5	1978	AP000769.1	0	sequencing in progress
18	36333535	rs2625065	G	A	0.53	0.64	0.76	0.75	0	0	E006,7_Enh;E017,7_Enh;E025,7_Enh;E026,7_Enh;E027,7_Enh;E028,7_Enh;E049,7_Enh;E055,7_Enh;E083,2_TssAFlnk;E088,7_Enh;E092,7_Enh;E095,7_Enh;E104,7_Enh;E108,7_Enh;E116,7_Enh;E118,7_Enh;E119,7_Enh;E120,7_Enh;E121,7_Enh;E126,7_Enh;E128,7_Enh;E129,7_Enh	E005,19_DNase;E007,19_DNase;E010,19_DNase;E011,19_DNase;E013,19_DNase;E017,19_DNase;E022,19_DNase;E023,17_EnhW2;E025,18_EnhAc;E026,17_EnhW2;E028,16_EnhW1;E049,17_EnhW2;E050,19_DNase;E052,17_EnhW2;E053,19_DNase;E054,19_DNase;E055,19_DNase;E056,17_EnhW2;E057,19_DNase;E058,19_DNase;E059,19_DNase;E061,19_DNase;E062,19_DNase;E063,19_DNase;E065,19_DNase;E067,19_DNase;E068,19_DNase;E071,19_DNase;E072,19…	E001,H3K4me1_Enh;E005,H3K4me1_Enh;E006,H3K4me1_Enh;E007,H3K4me1_Enh;E009,H3K4me1_Enh;E010,H3K4me1_Enh;E012,H3K4me1_Enh;E014,H3K4me1_Enh;E016,H3K4me1_Enh;E017,H3K4me1_Enh;E018,H3K4me1_Enh;E022,H3K4me1_Enh;E023,H3K4me1_Enh;E025,H3K4me1_Enh;E026,H3K4me1_Enh;E027,H3K4me1_Enh;E028,H3K4me1_Enh;E049,H3K4me1_Enh;E052,H3K4me1_Enh;E053,H3K4me1_Enh;E054,H3K4me1_Enh;E055,H3K4me1_Enh;E067,H3K4me1_Enh;E068,H3K…	E017;E055;E056;E057;E088;E089;E090;E100;E116;E120;E121;E125;E126;E128	GM12878,TCF12,HudsonAlpha,None	Mrg_1;Mrg_2;Tgif1_1;Tgif1_2	ENSG00000134775.9	0	0	FHOD3	482341	gene
3	73499184	rs12632755	C	T	0.06	0.51	0.71	0.46	0	0	E006,7_Enh;E017,7_Enh;E027,7_Enh;E065,7_Enh;E070,7_Enh;E072,7_Enh;E083,7_Enh;E089,7_Enh;E095,7_Enh;E098,7_Enh;E104,7_Enh;E108,7_Enh;E111,7_Enh;E116,7_Enh	E055,17_EnhW2;E065,18_EnhAc;E068,17_EnhW2;E069,17_EnhW2;E072,17_EnhW2;E073,17_EnhW2;E083,18_EnhAc;E087,17_EnhW2;E090,17_EnhW2;E094,18_EnhAc;E095,13_EnhA1;E096,18_EnhAc;E097,18_EnhAc;E098,18_EnhAc;E100,18_EnhAc;E104,18_EnhAc;E105,15_EnhAF;E107,17_EnhW2;E108,18_EnhAc;E111,12_TxEnhW;E125,17_EnhW2	E001,H3K4me1_Enh;E002,H3K4me1_Enh;E011,H3K4me1_Enh;E012,H3K4me1_Enh;E013,H3K4me1_Enh;E017,H3K4me1_Enh;E021,H3K4me1_Enh;E022,H3K4me1_Enh;E025,H3K4me1_Enh;E027,H3K4me1_Enh;E053,H3K4me1_Enh;E054,H3K4me1_Enh;E055,H3K4me1_Enh;E056,H3K4me1_Enh;E059,H3K4me1_Enh;E065,H3K4me1_Enh;E067,H3K4me1_Enh;E068,H3K4me1_Enh;E069,H3K4me1_Enh;E070,H3K4me1_Enh;E071,H3K4me1_Enh;E072,H3K4me1_Enh;E073,H3K4me1_Enh;E076,H3K…	E083	.	EWSR1-FLI1	ENSG00000121440.10	0	0	PDZRN3	242507	gene
3	73499249	rs12632758	C	T	0.16	0.51	0.67	0.46	0	0	E006,7_Enh;E017,7_Enh;E027,7_Enh;E065,7_Enh;E070,7_Enh;E072,7_Enh;E083,7_Enh;E089,7_Enh;E095,7_Enh;E098,7_Enh;E104,7_Enh;E108,7_Enh;E111,7_Enh;E116,7_Enh	E055,17_EnhW2;E065,18_EnhAc;E068,17_EnhW2;E069,17_EnhW2;E072,17_EnhW2;E073,17_EnhW2;E083,18_EnhAc;E087,17_EnhW2;E090,17_EnhW2;E094,18_EnhAc;E095,13_EnhA1;E096,18_EnhAc;E097,18_EnhAc;E098,18_EnhAc;E100,18_EnhAc;E104,18_EnhAc;E105,15_EnhAF;E107,17_EnhW2;E108,18_EnhAc;E111,12_TxEnhW;E125,17_EnhW2	E001,H3K4me1_Enh;E002,H3K4me1_Enh;E011,H3K4me1_Enh;E012,H3K4me1_Enh;E013,H3K4me1_Enh;E017,H3K4me1_Enh;E021,H3K4me1_Enh;E022,H3K4me1_Enh;E025,H3K4me1_Enh;E027,H3K4me1_Enh;E053,H3K4me1_Enh;E054,H3K4me1_Enh;E055,H3K4me1_Enh;E056,H3K4me1_Enh;E059,H3K4me1_Enh;E065,H3K4me1_Enh;E067,H3K4me1_Enh;E068,H3K4me1_Enh;E069,H3K4me1_Enh;E070,H3K4me1_Enh;E071,H3K4me1_Enh;E072,H3K4me1_Enh;E073,H3K4me1_Enh;E076,H3K…		GM12878,EBF1,HudsonAlpha,None;GM12878,EBF1,Stanford,None	AP-1_disc5;AP-1_disc7;Bach1	ENSG00000121440.10	0	0	PDZRN3	242507	gene
6	148682275	rs4897035	C	T	0.47	0.79	0.87	0.68	1	0	E006,7_Enh;E029,7_Enh;E031,7_Enh;E032,7_Enh;E035,7_Enh;E036,7_Enh;E046,7_Enh;E050,7_Enh;E051,7_Enh;E055,7_Enh;E080,7_Enh;E098,7_Enh;E106,12_EnhBiv;E113,7_Enh;E116,7_Enh;E124,2_TssAFlnk;E126,7_Enh	E006,22_PromP;E023,19_DNase;E025,19_DNase;E029,14_EnhA2;E030,15_EnhAF;E031,14_EnhA2;E032,15_EnhAF;E033,17_EnhW2;E034,17_EnhW2;E035,16_EnhW1;E036,14_EnhA2;E046,17_EnhW2;E050,15_EnhAF;E051,14_EnhA2;E055,16_EnhW1;E056,17_EnhW2;E062,17_EnhW2;E066,17_EnhW2;E071,17_EnhW2;E077,17_EnhW2;E093,17_EnhW2;E106,17_EnhW2;E110,17_EnhW2;E112,17_EnhW2;E113,17_EnhW2;E115,17_EnhW2;E116,17_EnhW2;E124,13_EnhA1;E128,19…	E005,H3K4me1_Enh;E006,H3K4me1_Enh;E017,H3K4me1_Enh;E021,H3K4me1_Enh;E029,H3K4me1_Enh;E031,H3K4me1_Enh;E032,H3K4me1_Enh;E035,H3K4me1_Enh;E036,H3K4me1_Enh;E046,H3K4me1_Enh;E050,H3K4me1_Enh;E051,H3K4me1_Enh;E055,H3K4me1_Enh;E061,H3K4me1_Enh;E069,H3K4me1_Enh;E079,H3K4me1_Enh;E080,H3K4me1_Enh;E093,H3K4me1_Enh;E096,H3K4me1_Enh;E098,H3K4me1_Enh;E105,H3K4me1_Enh;E113,H3K4me1_Enh;E116,H3K4me1_Enh;E124,H3K…	E021;E055;E056;E080;E126	.	ETF;Myf_3	ENSG00000111962.7	5	65052	UST	329662	gene
2	134587539	rs842358	G	A	0.19	0.51	0.78	0.44	0	0	E006,7_Enh;E051,7_Enh;E118,12_EnhBiv		E005,H3K4me1_Enh;E006,H3K4me1_Enh;E034,H3K4me1_Enh;E036,H3K4me1_Enh;E046,H3K4me1_Enh;E050,H3K4me1_Enh;E051,H3K4me1_Enh;E053,H3K4me1_Enh;E083,H3K4me1_Enh;E094,H3K4me1_Enh;E096,H3K4me1_Enh;E110,H3K4me1_Enh;E115,H3K4me1_Enh;E118,H3K4me1_Enh;E083,H3K4me3_Pro;E096,H3K27ac_Enh;E115,H3K27ac_Enh		.	ERalpha-a_known1;HIF1;HIF1::Arnt;Nanog_disc2;PPAR_1;PPAR_3;RORalpha1_1;RXRA_known1	ENSG00000152128.13	0	0	TMEM163	263241	gene
4	56303903	rs7663516	G	T	0.62	0.17	0.14	0.16	0	0	E006,7_Enh;E070,7_Enh;E085,6_EnhG;E088,7_Enh;E089,7_Enh		E006,H3K27ac_Enh;E011,H3K27ac_Enh;E013,H3K27ac_Enh;E061,H3K27ac_Enh;E067,H3K27ac_Enh;E089,H3K27ac_Enh;E006,H3K4me1_Enh;E010,H3K4me1_Enh;E017,H3K4me1_Enh;E059,H3K4me1_Enh;E061,H3K4me1_Enh;E070,H3K4me1_Enh;E077,H3K4me1_Enh;E081,H3K4me1_Enh;E082,H3K4me1_Enh;E084,H3K4me1_Enh;E085,H3K4me1_Enh;E088,H3K4me1_Enh;E089,H3K4me1_Enh;E090,H3K4me1_Enh;E092,H3K4me1_Enh;E102,H3K4me1_Enh;E125,H3K4me1_Enh;E006,H3K…		.	BCL_disc4;Irf_known11;Irf_known9;Pax-5_disc3;TCF4_disc2;p300_disc5	ENSG00000109265.8	0	0	KIAA1211	279552	gene
17	65773107	rs9894298	G	A	0.7	0.5	0.78	0.37	0	0	E007,7_Enh;E009,7_Enh;E033,7_Enh;E077,7_Enh;E100,7_Enh;E101,7_Enh;E102,7_Enh;E118,7_Enh	E009,17_EnhW2;E077,16_EnhW1;E078,19_DNase;E084,16_EnhW1;E085,19_DNase;E087,19_DNase;E094,19_DNase;E098,19_DNase;E100,19_DNase;E101,16_EnhW1;E102,19_DNase;E106,19_DNase;E109,19_DNase;E110,14_EnhA2	E001,H3K4me1_Enh;E007,H3K4me1_Enh;E009,H3K4me1_Enh;E010,H3K4me1_Enh;E011,H3K4me1_Enh;E012,H3K4me1_Enh;E015,H3K4me1_Enh;E018,H3K4me1_Enh;E033,H3K4me1_Enh;E077,H3K4me1_Enh;E083,H3K4me1_Enh;E084,H3K4me1_Enh;E085,H3K4me1_Enh;E087,H3K4me1_Enh;E093,H3K4me1_Enh;E099,H3K4me1_Enh;E100,H3K4me1_Enh;E101,H3K4me1_Enh;E106,H3K4me1_Enh;E107,H3K4me1_Enh;E109,H3K4me1_Enh;E110,H3K4me1_Enh;E114,H3K4me1_Enh;E118,H3K…	E007;E022;E083;E084;E089;E109	.	Pax-5_disc1;STAT_disc6;TCF12_disc6	ENSG00000154240.12	0	0	CEP112	556546	gene
17	65773266	rs9899781	C	T	0.7	0.5	0.78	0.37	0	0	E007,7_Enh;E009,7_Enh;E033,7_Enh;E077,7_Enh;E100,7_Enh;E101,7_Enh;E102,7_Enh;E118,7_Enh	E009,17_EnhW2;E077,16_EnhW1;E078,19_DNase;E084,16_EnhW1;E085,19_DNase;E087,19_DNase;E094,19_DNase;E098,19_DNase;E100,19_DNase;E101,16_EnhW1;E102,19_DNase;E106,19_DNase;E109,19_DNase;E110,14_EnhA2	E001,H3K4me1_Enh;E007,H3K4me1_Enh;E009,H3K4me1_Enh;E010,H3K4me1_Enh;E011,H3K4me1_Enh;E012,H3K4me1_Enh;E013,H3K4me1_Enh;E015,H3K4me1_Enh;E018,H3K4me1_Enh;E033,H3K4me1_Enh;E061,H3K4me1_Enh;E077,H3K4me1_Enh;E083,H3K4me1_Enh;E084,H3K4me1_Enh;E085,H3K4me1_Enh;E087,H3K4me1_Enh;E093,H3K4me1_Enh;E099,H3K4me1_Enh;E101,H3K4me1_Enh;E104,H3K4me1_Enh;E106,H3K4me1_Enh;E107,H3K4me1_Enh;E109,H3K4me1_Enh;E110,H3K…	E084;E085;E092;E094;E109	.	Irf_known1;Irf_known7	ENSG00000154240.12	0	0	CEP112	556546	gene
10	84802276	rs2497993	A	G	0.71	0.63	0.75	0.68	0	0	E007,7_Enh;E013,7_Enh		E004,H3K27ac_Enh;E013,H3K27ac_Enh;E005,H3K4me1_Enh;E007,H3K4me1_Enh;E011,H3K4me1_Enh;E013,H3K4me1_Enh;E095,H3K4me1_Enh;E011,H3K4me3_Pro;E083,H3K4me3_Pro;E094,H3K4me3_Pro		.	Maf_disc2;Zfp105	ENSG00000238469.1	5	60988	AC091487.1	0	sequencing in progress
6	27283600	rs13207082	A	G	0.04	0.03	0	0.07	0	0	E008,1_TssA;E011,10_TssBiv;E016,10_TssBiv;E020,10_TssBiv;E042,10_TssBiv;E055,10_TssBiv;E056,12_EnhBiv;E127,10_TssBiv	E008,23_PromBiv;E011,23_PromBiv;E014,23_PromBiv;E016,23_PromBiv;E019,23_PromBiv;E020,23_PromBiv;E042,23_PromBiv;E054,23_PromBiv;E055,23_PromBiv;E056,23_PromBiv;E058,23_PromBiv;E078,23_PromBiv;E119,23_PromBiv;E127,23_PromBiv	E008,H3K4me3_Pro;E011,H3K4me3_Pro;E014,H3K4me3_Pro;E016,H3K4me3_Pro;E017,H3K4me3_Pro;E020,H3K4me3_Pro;E025,H3K4me3_Pro;E033,H3K4me3_Pro;E040,H3K4me3_Pro;E042,H3K4me3_Pro;E055,H3K4me3_Pro;E056,H3K4me3_Pro;E071,H3K4me3_Pro;E100,H3K4me3_Pro;E105,H3K4me3_Pro;E117,H3K4me3_Pro;E127,H3K4me3_Pro;E021,H3K27ac_Enh;E036,H3K4me1_Enh;E042,H3K4me1_Enh;E054,H3K4me1_Enh;E055,H3K4me1_Enh;E056,H3K4me1_Enh;E058,H3K…	E059	.	CEBPB_known1;CEBPB_known6;GR_known3;Hsf_known1;Hsf_known2	ENSG00000158553.3	3	2302	POM121L2	26267	gene
9	117349462	rs7862524	C	T	0.35	0.3	0.06	0.36	0	0	E008,7_Enh;E013,7_Enh;E016,7_Enh	E011,17_EnhW2;E012,17_EnhW2;E019,17_EnhW2;E020,17_EnhW2	E001,H3K4me1_Enh;E003,H3K4me1_Enh;E007,H3K4me1_Enh;E008,H3K4me1_Enh;E011,H3K4me1_Enh;E012,H3K4me1_Enh;E013,H3K4me1_Enh;E016,H3K4me1_Enh;E018,H3K4me1_Enh;E020,H3K4me1_Enh;E024,H3K4me1_Enh;E067,H3K4me1_Enh;E068,H3K4me1_Enh;E069,H3K4me1_Enh;E071,H3K4me1_Enh;E073,H3K4me1_Enh;E074,H3K4me1_Enh;E103,H3K4me1_Enh;E013,H3K27ac_Enh;E020,H3K27ac_Enh;E014,H3K9ac_Pro;E027,H3K9ac_Pro		.	Hoxa5_1;Sox_10;Sox_13;Sox_14;Sox_16;Sox_18;Sox_19;Sox_7	ENSG00000148219.12	0	0	ASTN2	996814	gene
6	57502489	rs7748620	T	C	0.01	0.14	0.06	0.15	0	0	E008,7_Enh;E094,7_Enh		E004,H3K4me1_Enh;E094,H3K4me1_Enh;E118,H3K4me1_Enh;E005,H3K9ac_Pro;E012,H3K27ac_Enh;E014,H3K27ac_Enh;E017,H3K27ac_Enh;E020,H3K27ac_Enh;E055,H3K27ac_Enh;E056,H3K27ac_Enh;E118,H3K27ac_Enh;E126,H3K27ac_Enh	E091	.	Pou2f2_known1;Pou2f2_known6;Pou3f2_3	ENSG00000146143.12	0	0	PRIM2	332044	gene
20	62023004	rs8121843	A	G	0.19	0.03	0.02	0.01	0	0	E009,7_Enh;E010,7_Enh;E011,7_Enh;E012,7_Enh;E066,7_Enh;E070,7_Enh;E086,7_Enh;E089,7_Enh;E090,7_Enh;E107,7_Enh;E108,7_Enh;E111,7_Enh;E118,7_Enh	E009,10_TxEnh5;E010,10_TxEnh5;E066,10_TxEnh5;E107,12_TxEnhW;E108,12_TxEnhW;E118,12_TxEnhW	E003,H3K27ac_Enh;E007,H3K27ac_Enh;E015,H3K27ac_Enh;E016,H3K27ac_Enh;E020,H3K27ac_Enh;E061,H3K27ac_Enh;E097,H3K27ac_Enh;E105,H3K27ac_Enh;E115,H3K27ac_Enh;E118,H3K27ac_Enh;E124,H3K27ac_Enh;E003,H3K4me1_Enh;E006,H3K4me1_Enh;E007,H3K4me1_Enh;E009,H3K4me1_Enh;E010,H3K4me1_Enh;E011,H3K4me1_Enh;E012,H3K4me1_Enh;E013,H3K4me1_Enh;E014,H3K4me1_Enh;E015,H3K4me1_Enh;E016,H3K4me1_Enh;E017,H3K4me1_Enh;E018,H3K…		HepG2,MAFK,Stanford,None;HepG2,MAFK,Stanford,None	Foxj2_2;Osr	ENSG00000130699.10	0	0	TAF4	112341	gene
1	98452878	rs1434370	T	G	0.23	0.41	0.56	0.27	1	1	E009,7_Enh;E010,7_Enh;E029,7_Enh;E035,7_Enh;E036,7_Enh;E053,7_Enh;E054,7_Enh;E070,7_Enh;E088,7_Enh;E115,7_Enh;E124,1_TssA	E009,19_DNase;E010,19_DNase;E019,19_DNase;E029,19_DNase;E030,16_EnhW1;E035,19_DNase;E036,19_DNase;E040,19_DNase;E045,19_DNase;E049,19_DNase;E050,19_DNase;E051,19_DNase;E053,19_DNase;E054,16_EnhW1;E062,19_DNase;E070,19_DNase;E088,19_DNase;E115,19_DNase;E124,16_EnhW1	E001,H3K4me1_Enh;E009,H3K4me1_Enh;E010,H3K4me1_Enh;E020,H3K4me1_Enh;E029,H3K4me1_Enh;E030,H3K4me1_Enh;E036,H3K4me1_Enh;E050,H3K4me1_Enh;E051,H3K4me1_Enh;E053,H3K4me1_Enh;E054,H3K4me1_Enh;E070,H3K4me1_Enh;E082,H3K4me1_Enh;E087,H3K4me1_Enh;E088,H3K4me1_Enh;E114,H3K4me1_Enh;E115,H3K4me1_Enh;E124,H3K4me1_Enh;E012,H3K27ac_Enh;E013,H3K27ac_Enh;E020,H3K27ac_Enh;E124,H3K27ac_Enh;E019,H3K9ac_Pro;E106,H3K4…		.	CEBPA_1;CEBPB_known1;Gfi1_3;Gfi1b;RXRA_disc3;p300_disc2	ENSG00000221777.1	3	79378	AL160056.1	0	sequencing in progress
1	98452887	rs1434371	A	C	0.23	0.41	0.56	0.27	1	1	E009,7_Enh;E010,7_Enh;E029,7_Enh;E035,7_Enh;E036,7_Enh;E053,7_Enh;E054,7_Enh;E070,7_Enh;E088,7_Enh;E115,7_Enh;E124,1_TssA	E009,19_DNase;E010,19_DNase;E019,19_DNase;E029,19_DNase;E030,16_EnhW1;E035,19_DNase;E036,19_DNase;E040,19_DNase;E045,19_DNase;E049,19_DNase;E050,19_DNase;E051,19_DNase;E053,19_DNase;E054,16_EnhW1;E062,19_DNase;E070,19_DNase;E088,19_DNase;E115,19_DNase;E124,16_EnhW1	E001,H3K4me1_Enh;E009,H3K4me1_Enh;E010,H3K4me1_Enh;E020,H3K4me1_Enh;E029,H3K4me1_Enh;E030,H3K4me1_Enh;E036,H3K4me1_Enh;E050,H3K4me1_Enh;E051,H3K4me1_Enh;E053,H3K4me1_Enh;E054,H3K4me1_Enh;E070,H3K4me1_Enh;E082,H3K4me1_Enh;E087,H3K4me1_Enh;E088,H3K4me1_Enh;E114,H3K4me1_Enh;E115,H3K4me1_Enh;E124,H3K4me1_Enh;E012,H3K27ac_Enh;E013,H3K27ac_Enh;E020,H3K27ac_Enh;E124,H3K27ac_Enh;E019,H3K9ac_Pro;E106,H3K4…		.	Barx1;CEBPA_1;CEBPB_known1;HNF4_disc2;Nanog_known1;Osr;p300_disc2	ENSG00000221777.1	3	79387	AL160056.1	0	sequencing in progress
1	98452095	rs7514150	T	G	0.23	0.41	0.56	0.27	0	1	E009,7_Enh;E029,7_Enh;E030,7_Enh;E050,7_Enh;E053,7_Enh;E082,7_Enh;E115,7_Enh;E124,7_Enh	E030,17_EnhW2;E035,17_EnhW2;E036,17_EnhW2;E051,17_EnhW2;E054,17_EnhW2	E001,H3K4me1_Enh;E002,H3K4me1_Enh;E009,H3K4me1_Enh;E010,H3K4me1_Enh;E014,H3K4me1_Enh;E020,H3K4me1_Enh;E029,H3K4me1_Enh;E030,H3K4me1_Enh;E036,H3K4me1_Enh;E050,H3K4me1_Enh;E051,H3K4me1_Enh;E053,H3K4me1_Enh;E054,H3K4me1_Enh;E070,H3K4me1_Enh;E082,H3K4me1_Enh;E088,H3K4me1_Enh;E114,H3K4me1_Enh;E115,H3K4me1_Enh;E124,H3K4me1_Enh;E013,H3K27ac_Enh;E020,H3K27ac_Enh;E019,H3K9ac_Pro		.	DMRT1;Mef2_known4;Pax-4_4;Sox_10;Sox_13;Sox_16;Sox_19;Sox_2;Sox_9;TATA_known4;TATA_known5	ENSG00000221777.1	3	78595	AL160056.1	0	sequencing in progress
17	65773006	rs4791132	T	C	0.7	0.5	0.78	0.37	0	0	E009,7_Enh;E077,7_Enh;E101,7_Enh;E118,7_Enh	E101,16_EnhW1;E110,14_EnhA2	E007,H3K4me1_Enh;E009,H3K4me1_Enh;E010,H3K4me1_Enh;E011,H3K4me1_Enh;E012,H3K4me1_Enh;E015,H3K4me1_Enh;E018,H3K4me1_Enh;E033,H3K4me1_Enh;E077,H3K4me1_Enh;E083,H3K4me1_Enh;E084,H3K4me1_Enh;E085,H3K4me1_Enh;E087,H3K4me1_Enh;E100,H3K4me1_Enh;E101,H3K4me1_Enh;E106,H3K4me1_Enh;E107,H3K4me1_Enh;E109,H3K4me1_Enh;E110,H3K4me1_Enh;E114,H3K4me1_Enh;E118,H3K4me1_Enh;E011,H3K27ac_Enh;E100,H3K27ac_Enh;E101,H3K…	E085;E093	.	Hbp1;LXR_2;Pou1f1_1;Pou1f1_2;Zfp187	ENSG00000154240.12	0	0	CEP112	556546	gene
16	77420339	rs12934409	G	A	0.45	0.54	0.19	0.71	0	0	E010,12_EnhBiv;E069,7_Enh;E074,7_Enh	E069,17_EnhW2;E072,17_EnhW2;E074,17_EnhW2	E005,H3K27ac_Enh;E011,H3K27ac_Enh;E067,H3K27ac_Enh;E069,H3K27ac_Enh;E072,H3K27ac_Enh;E074,H3K27ac_Enh;E005,H3K4me1_Enh;E010,H3K4me1_Enh;E012,H3K4me1_Enh;E027,H3K4me1_Enh;E063,H3K4me1_Enh;E067,H3K4me1_Enh;E069,H3K4me1_Enh;E071,H3K4me1_Enh;E072,H3K4me1_Enh;E074,H3K4me1_Enh;E088,H3K4me1_Enh;E067,H3K4me3_Pro;E074,H3K4me3_Pro	E005	.	Foxj2_2;PPAR_1	ENSG00000140873.11	0	0	ADAMTS18	159987	gene
10	33596682	rs11009462	C	T	0.9	0.85	0.7	0.88	0	0	E010,7_Enh		E005,H3K4me1_Enh;E007,H3K4me1_Enh;E009,H3K4me1_Enh;E010,H3K4me1_Enh;E007,H3K27ac_Enh;E007,H3K4me3_Pro;E127,H3K4me3_Pro		.	Pax-4_1;Pax-8_1;RXRA_known1	ENSG00000226412.1	0	0	RP11-476F14.1	21109	no protein, long intergenic non-preotein coding RNA
6	60571703	rs2498201	G	A					0	0	E010,7_Enh;E014,7_Enh;E015,7_Enh;E016,7_Enh;E018,7_Enh;E023,7_Enh;E024,7_Enh;E025,7_Enh;E026,7_Enh;E027,7_Enh;E049,7_Enh;E052,7_Enh;E065,7_Enh;E126,7_Enh;E128,7_Enh;E129,7_Enh	E001,16_EnhW1;E002,19_DNase;E003,19_DNase;E004,19_DNase;E005,19_DNase;E006,19_DNase;E007,19_DNase;E008,19_DNase;E009,17_EnhW2;E010,19_DNase;E011,17_EnhW2;E012,19_DNase;E013,19_DNase;E014,19_DNase;E015,17_EnhW2;E016,16_EnhW1;E017,18_EnhAc;E018,16_EnhW1;E019,17_EnhW2;E020,16_EnhW1;E021,19_DNase;E022,19_DNase;E023,14_EnhA2;E024,16_EnhW1;E025,14_EnhA2;E026,13_EnhA1;E027,19_DNase;E028,19_DNase;E049,14…	E001,H3K4me1_Enh;E002,H3K4me1_Enh;E004,H3K4me1_Enh;E008,H3K4me1_Enh;E010,H3K4me1_Enh;E011,H3K4me1_Enh;E012,H3K4me1_Enh;E014,H3K4me1_Enh;E015,H3K4me1_Enh;E016,H3K4me1_Enh;E018,H3K4me1_Enh;E019,H3K4me1_Enh;E020,H3K4me1_Enh;E023,H3K4me1_Enh;E024,H3K4me1_Enh;E025,H3K4me1_Enh;E026,H3K4me1_Enh;E027,H3K4me1_Enh;E049,H3K4me1_Enh;E052,H3K4me1_Enh;E063,H3K4me1_Enh;E065,H3K4me1_Enh;E121,H3K4me1_Enh;E125,H3K…	E003;E004;E007;E008;E017;E055;E056;E057;E120;E125;E126;E128	AG09309,CTCF,UW,None;AG09319,CTCF,UW,None;AG10803,CTCF,UW,None;BJ,CTCF,UW,None;GM06990,CTCF,UW,None;GM12864,CTCF,UW,None;GM12865,CTCF,UW,None;GM12872,CTCF,UW,None;GM12874,CTCF,UW,None;GM12878,CTCF,Broad,None;GM12878,CTCF,UW,None;HEEpiC,CTCF,UW,None;HMEC,CTCF,Broad,None;HMF,CTCF,UW,None;HPF,CTCF,UW,None;HRE,CTCF,UW,None;HRPEpiC,CTCF,UW,None;HSMM,CTCF,Broad,None;HSMMtube,CTCF,Broad,None;HUVEC,CTCF,…	HDAC2_disc5	ENSG00000146143.12	3	26074	PRIM2	332044	gene
4	86611798	rs12509039	A	G	0.01	0.0028	0.01	0.01	0	0	E010,7_Enh;E019,7_Enh;E024,7_Enh;E042,7_Enh;E053,7_Enh;E054,7_Enh;E067,7_Enh;E068,7_Enh;E069,7_Enh;E071,7_Enh;E072,7_Enh;E073,7_Enh;E087,7_Enh	E009,10_TxEnh5;E011,12_TxEnhW;E012,12_TxEnhW;E013,17_EnhW2;E042,12_TxEnhW;E054,17_EnhW2;E067,17_EnhW2;E068,15_EnhAF;E069,12_TxEnhW;E071,10_TxEnh5;E072,10_TxEnh5;E073,12_TxEnhW;E074,17_EnhW2	E001,H3K4me1_Enh;E007,H3K4me1_Enh;E009,H3K4me1_Enh;E011,H3K4me1_Enh;E012,H3K4me1_Enh;E014,H3K4me1_Enh;E016,H3K4me1_Enh;E018,H3K4me1_Enh;E024,H3K4me1_Enh;E036,H3K4me1_Enh;E040,H3K4me1_Enh;E042,H3K4me1_Enh;E049,H3K4me1_Enh;E053,H3K4me1_Enh;E054,H3K4me1_Enh;E055,H3K4me1_Enh;E065,H3K4me1_Enh;E067,H3K4me1_Enh;E068,H3K4me1_Enh;E069,H3K4me1_Enh;E071,H3K4me1_Enh;E072,H3K4me1_Enh;E073,H3K4me1_Enh;E074,H3K…		.	Irf_known2	ENSG00000163629.8	0	0	PTPN13	220856	gene
6	57405227	rs12205722	C	T	0.01	0.14	0.05	0.13	1	1	E010,7_Enh;E087,7_Enh		E010,H3K4me1_Enh;E014,H3K4me1_Enh;E020,H3K4me1_Enh;E087,H3K4me1_Enh;E027,H3K9ac_Pro;E035,H3K4me3_Pro		HepG2,MAFF,Stanford,None;HepG2,MAFK,Stanford,None	.	ENSG00000146143.12	0	0	PRIM2	332044	gene
6	57405244	rs12205821	G	T	0.02	0.14	0.05	0.13	1	1	E010,7_Enh;E087,7_Enh		E010,H3K4me1_Enh;E014,H3K4me1_Enh;E020,H3K4me1_Enh;E087,H3K4me1_Enh;E027,H3K9ac_Pro;E035,H3K4me3_Pro		HepG2,MAFF,Stanford,None;HepG2,MAFK,Stanford,None	Pou1f1_1;Pou2f2_disc1;Pou2f2_known5;Pou5f1_disc2	ENSG00000146143.12	0	0	PRIM2	332044	gene
4	86634594	rs12509049	C	G	0.02	0.0028	0.01	0.01	0	0	E011,2_TssAFlnk;E042,7_Enh;E050,7_Enh;E051,7_Enh	E011,22_PromP;E035,17_EnhW2;E036,17_EnhW2;E042,22_PromP;E050,22_PromP;E051,16_EnhW1	E011,H3K4me1_Enh;E015,H3K4me1_Enh;E017,H3K4me1_Enh;E027,H3K4me1_Enh;E037,H3K4me1_Enh;E040,H3K4me1_Enh;E042,H3K4me1_Enh;E050,H3K4me1_Enh;E051,H3K4me1_Enh;E055,H3K4me1_Enh;E074,H3K4me1_Enh;E076,H3K4me1_Enh;E078,H3K4me1_Enh;E083,H3K4me1_Enh;E085,H3K4me1_Enh;E086,H3K4me1_Enh;E088,H3K4me1_Enh;E097,H3K4me1_Enh;E103,H3K4me1_Enh;E109,H3K4me1_Enh;E129,H3K4me1_Enh;E011,H3K4me3_Pro;E025,H3K4me3_Pro;E026,H3K…		.	Nrf1_known2;Pou2f2_known11	ENSG00000163629.8	0	0	PTPN13	220856	gene
3	25302124	rs322668	G	A	0.8	0.82	1	0.72	0	0	E011,7_Enh	E011,22_PromP;E027,19_DNase;E028,19_DNase;E058,19_DNase	E004,H3K4me1_Enh;E009,H3K4me1_Enh;E011,H3K4me1_Enh;E028,H3K4me1_Enh;E058,H3K4me1_Enh;E011,H3K27ac_Enh;E012,H3K27ac_Enh;E079,H3K27ac_Enh;E011,H3K4me3_Pro	E057;E120	.	Ascl2;E2A_2;E2A_3;E2A_5;Myf_4;Smad3_2;Smad_2;TAL1_known2	ENSG00000077092.14	0	0	RARB	423600	gene
4	86454813	rs12512524	C	G	0.01	0.0028	0.01	0.01	0	0	E011,7_Enh;E014,7_Enh;E016,7_Enh	E001,17_EnhW2;E011,17_EnhW2;E012,17_EnhW2;E014,17_EnhW2;E015,17_EnhW2;E019,17_EnhW2;E020,17_EnhW2	E001,H3K4me1_Enh;E003,H3K4me1_Enh;E004,H3K4me1_Enh;E008,H3K4me1_Enh;E010,H3K4me1_Enh;E011,H3K4me1_Enh;E012,H3K4me1_Enh;E013,H3K4me1_Enh;E014,H3K4me1_Enh;E015,H3K4me1_Enh;E016,H3K4me1_Enh;E018,H3K4me1_Enh;E019,H3K4me1_Enh;E020,H3K4me1_Enh;E074,H3K4me1_Enh;E086,H3K4me1_Enh;E087,H3K4me1_Enh;E112,H3K4me1_Enh;E117,H3K4me1_Enh;E001,H3K4me3_Pro;E011,H3K4me3_Pro;E020,H3K4me3_Pro;E068,H3K4me3_Pro;E072,H3K…		.	GATA_known14;TAL1_disc1	ENSG00000109339.14	0	0	MAPK10	579008	gene
6	60531635	rs12202781	G	A					0	0	E011,7_Enh;E035,7_Enh;E050,7_Enh;E051,7_Enh	E011,22_PromP;E030,17_EnhW2;E035,17_EnhW2;E036,17_EnhW2;E050,15_EnhAF;E051,14_EnhA2	E011,H3K4me1_Enh;E035,H3K4me1_Enh;E050,H3K4me1_Enh;E051,H3K4me1_Enh;E087,H3K4me1_Enh;E011,H3K4me3_Pro;E083,H3K4me3_Pro;E088,H3K4me3_Pro	E080	.	ATF3_known3;ATF3_known9	ENSG00000146143.12	0	0	PRIM2	332044	gene
7	97342200	rs11765888	T	C	0.28	0.36	0.25	0.31	0	0	E011,7_Enh;E080,7_Enh	E011,22_PromP;E014,17_EnhW2;E015,17_EnhW2;E080,22_PromP	E011,H3K4me1_Enh;E015,H3K4me1_Enh;E019,H3K4me1_Enh;E020,H3K4me1_Enh;E050,H3K4me1_Enh;E080,H3K4me1_Enh;E084,H3K4me1_Enh;E080,H3K27ac_Enh;E083,H3K4me3_Pro		.	AP-3;Dbx1;Sox_3	ENSG00000221192.1	5	50603	AC004745.1	97137	bacterial clone
7	97342254	rs11769117	A	G	0.07	0.24	0.11	0.26	0	0	E011,7_Enh;E080,7_Enh	E011,22_PromP;E014,17_EnhW2;E015,17_EnhW2;E080,22_PromP	E011,H3K4me1_Enh;E015,H3K4me1_Enh;E019,H3K4me1_Enh;E020,H3K4me1_Enh;E050,H3K4me1_Enh;E080,H3K4me1_Enh;E084,H3K4me1_Enh;E011,H3K4me3_Pro;E083,H3K4me3_Pro;E080,H3K27ac_Enh	E080	.	PRDM1_known1	ENSG00000221192.1	5	50657	AC004745.1	97137	bacterial clone
10	84756060	rs2960355	A	G	0.62	0.64	0.74	0.68	0	0	E012,7_Enh;E016,7_Enh	E004,17_EnhW2;E011,22_PromP;E012,17_EnhW2;E013,17_EnhW2	E004,H3K27ac_Enh;E007,H3K27ac_Enh;E011,H3K27ac_Enh;E012,H3K27ac_Enh;E014,H3K27ac_Enh;E004,H3K4me1_Enh;E007,H3K4me1_Enh;E011,H3K4me1_Enh;E012,H3K4me1_Enh;E013,H3K4me1_Enh;E014,H3K4me1_Enh;E015,H3K4me1_Enh;E016,H3K4me1_Enh;E018,H3K4me1_Enh;E024,H3K4me1_Enh;E011,H3K4me3_Pro;E125,H3K4me3_Pro		.	AP-3;Ets_disc6;Gfi1_1;Gfi1_2;Hoxa3_1;Myc_disc6;Ncx_1	ENSG00000238469.1	5	107204	AC091487.1	0	sequencing in progress
17	65774380	rs7215462	T	C	0.7	0.5	0.78	0.37	0	0	E012,7_Enh;E033,7_Enh;E034,7_Enh;E036,7_Enh;E039,7_Enh;E050,7_Enh;E051,7_Enh;E083,7_Enh;E093,7_Enh;E110,7_Enh;E112,7_Enh;E113,7_Enh;E115,7_Enh	E031,17_EnhW2;E033,17_EnhW2;E035,17_EnhW2;E036,17_EnhW2;E037,17_EnhW2;E050,17_EnhW2;E051,17_EnhW2;E062,17_EnhW2;E083,14_EnhA2;E093,17_EnhW2	E001,H3K4me1_Enh;E003,H3K4me1_Enh;E007,H3K4me1_Enh;E009,H3K4me1_Enh;E010,H3K4me1_Enh;E011,H3K4me1_Enh;E012,H3K4me1_Enh;E018,H3K4me1_Enh;E024,H3K4me1_Enh;E033,H3K4me1_Enh;E034,H3K4me1_Enh;E036,H3K4me1_Enh;E038,H3K4me1_Enh;E039,H3K4me1_Enh;E041,H3K4me1_Enh;E046,H3K4me1_Enh;E047,H3K4me1_Enh;E050,H3K4me1_Enh;E051,H3K4me1_Enh;E061,H3K4me1_Enh;E075,H3K4me1_Enh;E077,H3K4me1_Enh;E079,H3K4me1_Enh;E083,H3K…	E083;E114	.	CTCF_disc5;Myf_1;NRSF_disc10;RXRA_disc2	ENSG00000154240.12	0	0	CEP112	556546	gene
10	132642605	rs4880419	C	T	0.13	0.44	0.8	0.46	0	0	E012,7_Enh;E055,7_Enh;E068,7_Enh;E073,7_Enh;E076,7_Enh;E103,7_Enh;E111,7_Enh	E067,10_TxEnh5;E068,10_TxEnh5;E069,10_TxEnh5;E071,10_TxEnh5;E072,10_TxEnh5;E073,10_TxEnh5;E074,10_TxEnh5;E076,10_TxEnh5;E103,15_EnhAF;E111,10_TxEnh5	E005,H3K4me1_Enh;E009,H3K4me1_Enh;E012,H3K4me1_Enh;E027,H3K4me1_Enh;E039,H3K4me1_Enh;E041,H3K4me1_Enh;E044,H3K4me1_Enh;E047,H3K4me1_Enh;E055,H3K4me1_Enh;E056,H3K4me1_Enh;E067,H3K4me1_Enh;E068,H3K4me1_Enh;E069,H3K4me1_Enh;E071,H3K4me1_Enh;E072,H3K4me1_Enh;E073,H3K4me1_Enh;E074,H3K4me1_Enh;E075,H3K4me1_Enh;E076,H3K4me1_Enh;E078,H3K4me1_Enh;E079,H3K4me1_Enh;E089,H3K4me1_Enh;E090,H3K4me1_Enh;E092,H3K…		.	Egr-1_disc4;Pbx3_disc2;SETDB1_disc1;Tgif1_2;Znf143_disc3;Znf143_disc4	ENSG00000068383.13	0	0	INPP5A	245660	gene
16	24301447	rs7204986	T	C	0.62	0.34	0.14	0.34	0	0	E012,7_Enh;E117,7_Enh		E006,H3K4me3_Pro;E113,H3K4me3_Pro;E008,H3K27ac_Enh;E012,H3K4me1_Enh;E117,H3K4me1_Enh	E007	.	ERalpha-a_known3;Nrf1_known2;Pdx1_2;RORalpha1_3	ENSG00000006116.3	0	0	CACNG3	107248	gene
3	73497638	rs4677292	G	A	0.16	0.53	0.67	0.48	0	0	E013,7_Enh;E020,7_Enh;E049,7_Enh;E053,7_Enh		E001,H3K4me1_Enh;E003,H3K4me1_Enh;E004,H3K4me1_Enh;E011,H3K4me1_Enh;E012,H3K4me1_Enh;E013,H3K4me1_Enh;E014,H3K4me1_Enh;E015,H3K4me1_Enh;E016,H3K4me1_Enh;E018,H3K4me1_Enh;E019,H3K4me1_Enh;E020,H3K4me1_Enh;E021,H3K4me1_Enh;E024,H3K4me1_Enh;E025,H3K4me1_Enh;E027,H3K4me1_Enh;E049,H3K4me1_Enh;E053,H3K4me1_Enh;E054,H3K4me1_Enh;E055,H3K4me1_Enh;E056,H3K4me1_Enh;E065,H3K4me1_Enh;E067,H3K4me1_Enh;E068,H3K…		.	MZF1::1-4_2	ENSG00000121440.10	0	0	PDZRN3	242507	gene
6	12805350	rs6909834	C	T	0.53	0.32	0.02	0.34	0	0	E013,7_Enh;E059,7_Enh;E061,7_Enh;E120,7_Enh	E013,19_DNase;E023,19_DNase;E026,19_DNase;E049,19_DNase;E061,19_DNase;E062,19_DNase;E105,19_DNase;E120,19_DNase;E121,19_DNase;E122,19_DNase;E125,19_DNase;E126,19_DNase;E129,19_DNase	E013,H3K4me1_Enh;E036,H3K4me1_Enh;E050,H3K4me1_Enh;E051,H3K4me1_Enh;E061,H3K4me1_Enh;E068,H3K4me1_Enh;E120,H3K4me1_Enh;E121,H3K4me1_Enh;E125,H3K4me1_Enh;E061,H3K27ac_Enh;E068,H3K27ac_Enh;E073,H3K27ac_Enh;E091,H3K27ac_Enh;E120,H3K27ac_Enh;E125,H3K9ac_Pro	E059;E125;E128	.	GATA_disc1;GATA_known1;GATA_known10;GATA_known14;GATA_known3;HDAC2_disc1;HMGN3_disc2;Lmo2-complex_2;TAL1_disc1	ENSG00000112137.11	0	0	PHACTR1	573679	gene
16	19134893	rs6497331	G	A	0.4	0.66	0.79	0.67	0	0	E013,7_Enh;E088,7_Enh;E114,7_Enh;E127,7_Enh		E002,H3K4me1_Enh;E011,H3K4me1_Enh;E013,H3K4me1_Enh;E018,H3K4me1_Enh;E021,H3K4me1_Enh;E027,H3K4me1_Enh;E028,H3K4me1_Enh;E053,H3K4me1_Enh;E054,H3K4me1_Enh;E055,H3K4me1_Enh;E057,H3K4me1_Enh;E058,H3K4me1_Enh;E063,H3K4me1_Enh;E075,H3K4me1_Enh;E079,H3K4me1_Enh;E084,H3K4me1_Enh;E085,H3K4me1_Enh;E088,H3K4me1_Enh;E089,H3K4me1_Enh;E090,H3K4me1_Enh;E091,H3K4me1_Enh;E092,H3K4me1_Enh;E093,H3K4me1_Enh;E095,H3K…	E100	.	PU.1_disc3;SRF_disc2;STAT_disc7;Smad3_1;TAL1_disc1	ENSG00000261427.2	0	0	CTD-2349B8.1	59576	gene
8	55911999	rs1546519	G	A	0.91	0.75	0.98	0.72	0	0	E014,7_Enh;E015,7_Enh;E019,7_Enh;E023,7_Enh;E029,7_Enh;E030,2_TssAFlnk;E031,7_Enh;E032,6_EnhG;E046,7_Enh;E050,7_Enh;E051,7_Enh;E113,7_Enh;E116,3_TxFlnk;E123,7_Enh;E124,7_Enh	E008,12_TxEnhW;E013,12_TxEnhW;E023,22_PromP;E029,10_TxEnh5;E030,9_TxReg;E031,10_TxEnh5;E032,10_TxEnh5;E033,12_TxEnhW;E035,12_TxEnhW;E036,12_TxEnhW;E050,10_TxEnh5;E051,12_TxEnhW;E062,12_TxEnhW;E113,12_TxEnhW;E116,12_TxEnhW;E124,10_TxEnh5	E008,H3K27ac_Enh;E013,H3K27ac_Enh;E020,H3K27ac_Enh;E021,H3K27ac_Enh;E029,H3K27ac_Enh;E032,H3K27ac_Enh;E050,H3K27ac_Enh;E113,H3K27ac_Enh;E116,H3K27ac_Enh;E123,H3K27ac_Enh;E124,H3K27ac_Enh;E013,H3K4me1_Enh;E014,H3K4me1_Enh;E015,H3K4me1_Enh;E019,H3K4me1_Enh;E020,H3K4me1_Enh;E023,H3K4me1_Enh;E024,H3K4me1_Enh;E028,H3K4me1_Enh;E029,H3K4me1_Enh;E030,H3K4me1_Enh;E031,H3K4me1_Enh;E032,H3K4me1_Enh;E035,H3K…	E021;E116	.	.	ENSG00000254087.2	0	0	LYN	134355	gene
1	26339111	rs11247921	G	C	0.23	0.23	0.18	0.18	0	0	E014,7_Enh;E015,7_Enh;E090,12_EnhBiv;E123,7_Enh	E008,17_EnhW2;E018,17_EnhW2	E003,H3K27ac_Enh;E011,H3K27ac_Enh;E012,H3K27ac_Enh;E016,H3K27ac_Enh;E021,H3K27ac_Enh;E037,H3K27ac_Enh;E040,H3K27ac_Enh;E041,H3K27ac_Enh;E042,H3K27ac_Enh;E043,H3K27ac_Enh;E045,H3K27ac_Enh;E046,H3K27ac_Enh;E048,H3K27ac_Enh;E056,H3K27ac_Enh;E061,H3K27ac_Enh;E079,H3K27ac_Enh;E123,H3K27ac_Enh;E003,H3K4me1_Enh;E005,H3K4me1_Enh;E007,H3K4me1_Enh;E009,H3K4me1_Enh;E012,H3K4me1_Enh;E015,H3K4me1_Enh;E018,H3K…		.	AFP1	ENSG00000176092.8	0	0	AIM1L	32271	gene
6	60950939	rs3125361	C	T					1	0	E014,7_Enh;E019,7_Enh	E015,17_EnhW2;E019,18_EnhAc;E020,17_EnhW2	E001,H3K4me1_Enh;E002,H3K4me1_Enh;E009,H3K4me1_Enh;E010,H3K4me1_Enh;E012,H3K4me1_Enh;E014,H3K4me1_Enh;E015,H3K4me1_Enh;E016,H3K4me1_Enh;E018,H3K4me1_Enh;E019,H3K4me1_Enh;E020,H3K4me1_Enh;E053,H3K4me1_Enh;E003,H3K27ac_Enh;E007,H3K27ac_Enh;E008,H3K27ac_Enh;E012,H3K27ac_Enh;E014,H3K27ac_Enh;E016,H3K27ac_Enh;E020,H3K27ac_Enh;E058,H3K27ac_Enh;E127,H3K27ac_Enh;E020,H3K4me3_Pro;E020,H3K9ac_Pro		.	STAT_known1;Sox_1;TCF4_known1;TCF4_known2;TCF4_known3	ENSG00000231273.1	3	227040	RP11-343D24.2	750	no protein, long intergenic non-preotein coding RNA
4	86684863	rs12498653	G	A	0.02	0.0028	0.01	0.01	0	0	E014,7_Enh;E117,7_Enh		E001,H3K4me1_Enh;E014,H3K4me1_Enh;E026,H3K4me1_Enh;E028,H3K4me1_Enh;E057,H3K4me1_Enh;E058,H3K4me1_Enh;E067,H3K4me1_Enh;E068,H3K4me1_Enh;E069,H3K4me1_Enh;E071,H3K4me1_Enh;E074,H3K4me1_Enh;E086,H3K4me1_Enh;E114,H3K4me1_Enh;E117,H3K4me1_Enh;E127,H3K4me1_Enh;E011,H3K27ac_Enh;E012,H3K27ac_Enh;E013,H3K27ac_Enh;E058,H3K27ac_Enh;E068,H3K27ac_Enh;E091,H3K27ac_Enh;E063,H3K9ac_Pro		.	BRCA1_known2;Nanog_disc4	ENSG00000163629.8	0	0	PTPN13	220856	gene
8	89176725	rs12056356	A	G	0.01	0.15	0.11	0.09	1	0	E015,1_TssA	E114,19_DNase	E011,H3K4me3_Pro;E015,H3K4me3_Pro;E015,H3K27ac_Enh;E015,H3K9ac_Pro	E117	.	Eomes;Hoxa9;Hoxb9;Sox_6	ENSG00000251136.2	3	432674	RP11-37B2.1	148318	no protein, long intergenic non-preotein coding RNA
6	12790121	rs2327619	G	A	0.52	0.31	0.02	0.34	0	0	E016,7_Enh		E001,H3K4me1_Enh;E012,H3K4me1_Enh;E014,H3K4me1_Enh;E015,H3K4me1_Enh;E016,H3K4me1_Enh;E018,H3K4me1_Enh;E020,H3K4me1_Enh;E061,H3K4me1_Enh;E001,H3K4me3_Pro;E067,H3K27ac_Enh;E072,H3K27ac_Enh		.	Irf_disc3;SEF-1	ENSG00000112137.11	0	0	PHACTR1	573679	gene
12	29625102	rs7955592	G	A	0.37	0.25	0.16	0.23	0	0	E016,7_Enh;E019,7_Enh;E020,7_Enh;E076,7_Enh;E077,7_Enh;E078,7_Enh;E080,7_Enh;E083,7_Enh;E086,7_Enh;E092,7_Enh;E104,7_Enh;E111,2_TssAFlnk	E011,17_EnhW2;E013,17_EnhW2;E019,17_EnhW2;E020,17_EnhW2;E065,19_DNase;E076,15_EnhAF;E077,16_EnhW1;E078,16_EnhW1;E083,14_EnhA2;E088,17_EnhW2;E094,19_DNase;E100,19_DNase;E106,19_DNase;E110,17_EnhW2;E111,16_EnhW1	E003,H3K4me1_Enh;E011,H3K4me1_Enh;E012,H3K4me1_Enh;E013,H3K4me1_Enh;E016,H3K4me1_Enh;E017,H3K4me1_Enh;E019,H3K4me1_Enh;E020,H3K4me1_Enh;E024,H3K4me1_Enh;E025,H3K4me1_Enh;E027,H3K4me1_Enh;E055,H3K4me1_Enh;E056,H3K4me1_Enh;E061,H3K4me1_Enh;E065,H3K4me1_Enh;E075,H3K4me1_Enh;E076,H3K4me1_Enh;E077,H3K4me1_Enh;E078,H3K4me1_Enh;E080,H3K4me1_Enh;E083,H3K4me1_Enh;E086,H3K4me1_Enh;E088,H3K4me1_Enh;E092,H3K…	E083;E086;E109;E119	.	AP-1_disc4	ENSG00000133687.11	0	0	TMTC1	283919	gene
14	47421178	rs8016913	T	A	0.46	0.46	0.39	0.34	0	0	E016,7_Enh;E053,7_Enh;E054,7_Enh		E001,H3K4me1_Enh;E009,H3K4me1_Enh;E010,H3K4me1_Enh;E012,H3K4me1_Enh;E014,H3K4me1_Enh;E015,H3K4me1_Enh;E016,H3K4me1_Enh;E018,H3K4me1_Enh;E019,H3K4me1_Enh;E020,H3K4me1_Enh;E024,H3K4me1_Enh;E053,H3K4me1_Enh;E054,H3K4me1_Enh;E072,H3K4me1_Enh;E074,H3K4me1_Enh;E003,H3K27ac_Enh;E014,H3K27ac_Enh;E016,H3K9ac_Pro;E019,H3K9ac_Pro		.	.	ENSG00000139915.13	0	0	MDGA2	835325	gene
20	62011419	rs6061952	A	G	0.29	0.04	0.02	0.01	0	0	E017,6_EnhG;E023,7_Enh;E024,6_EnhG;E025,7_Enh;E028,7_Enh;E034,6_EnhG;E053,6_EnhG;E055,6_EnhG;E056,6_EnhG;E063,7_Enh;E089,6_EnhG	E014,17_EnhW2;E023,17_EnhW2;E025,15_EnhAF;E055,12_TxEnhW;E056,11_TxEnh3;E059,11_TxEnh3;E066,12_TxEnhW;E068,12_TxEnhW;E073,11_TxEnh3;E078,11_TxEnh3	E001,H3K4me1_Enh;E010,H3K4me1_Enh;E011,H3K4me1_Enh;E012,H3K4me1_Enh;E014,H3K4me1_Enh;E016,H3K4me1_Enh;E017,H3K4me1_Enh;E021,H3K4me1_Enh;E022,H3K4me1_Enh;E023,H3K4me1_Enh;E024,H3K4me1_Enh;E025,H3K4me1_Enh;E027,H3K4me1_Enh;E028,H3K4me1_Enh;E034,H3K4me1_Enh;E037,H3K4me1_Enh;E038,H3K4me1_Enh;E039,H3K4me1_Enh;E040,H3K4me1_Enh;E044,H3K4me1_Enh;E046,H3K4me1_Enh;E047,H3K4me1_Enh;E048,H3K4me1_Enh;E053,H3K…	E008;E034;E055;E093	.	Myc_disc5;Nkx3_1;p300_disc2	ENSG00000130699.10	0	0	TAF4	112341	gene
3	37916812	rs7624710	C	G	0.02	0.01	0	0.03	0	0	E017,6_EnhG;E050,7_Enh;E051,7_Enh;E072,7_Enh;E087,7_Enh;E088,7_Enh;E092,7_Enh;E098,7_Enh;E104,7_Enh;E118,6_EnhG	E035,12_TxEnhW;E069,12_TxEnhW;E072,12_TxEnhW;E073,12_TxEnhW;E081,17_EnhW2;E083,12_TxEnhW;E086,12_TxEnhW;E088,10_TxEnh5	E001,H3K4me1_Enh;E002,H3K4me1_Enh;E006,H3K4me1_Enh;E011,H3K4me1_Enh;E013,H3K4me1_Enh;E014,H3K4me1_Enh;E015,H3K4me1_Enh;E016,H3K4me1_Enh;E017,H3K4me1_Enh;E018,H3K4me1_Enh;E020,H3K4me1_Enh;E021,H3K4me1_Enh;E024,H3K4me1_Enh;E027,H3K4me1_Enh;E030,H3K4me1_Enh;E050,H3K4me1_Enh;E051,H3K4me1_Enh;E056,H3K4me1_Enh;E058,H3K4me1_Enh;E061,H3K4me1_Enh;E065,H3K4me1_Enh;E066,H3K4me1_Enh;E067,H3K4me1_Enh;E069,H3K…		.	Crx_1;Crx_2;Dmbx1;Foxa_known2;Foxa_known4;GATA_known11;Gsc;MZF1::1-4_2;Obox6;Pitx3;STAT_known7;YY1_disc2	ENSG00000144677.10	0	0	CTDSPL	122509	gene
6	37551596	rs4714075	C	T	0.15	0.33	0.27	0.24	0	0	E017,7_Enh;E023,7_Enh;E024,7_Enh;E032,7_Enh;E063,7_Enh;E076,7_Enh;E080,12_EnhBiv;E081,7_Enh;E088,7_Enh;E091,7_Enh;E092,7_Enh;E093,7_Enh;E111,7_Enh;E116,7_Enh;E119,7_Enh;E128,12_EnhBiv	E023,18_EnhAc;E027,17_EnhW2;E032,18_EnhAc;E076,17_EnhW2;E078,17_EnhW2;E080,17_EnhW2;E083,17_EnhW2;E086,17_EnhW2;E091,17_EnhW2;E111,17_EnhW2;E116,15_EnhAF	E001,H3K4me1_Enh;E005,H3K4me1_Enh;E009,H3K4me1_Enh;E011,H3K4me1_Enh;E012,H3K4me1_Enh;E013,H3K4me1_Enh;E016,H3K4me1_Enh;E017,H3K4me1_Enh;E020,H3K4me1_Enh;E023,H3K4me1_Enh;E024,H3K4me1_Enh;E025,H3K4me1_Enh;E032,H3K4me1_Enh;E034,H3K4me1_Enh;E045,H3K4me1_Enh;E046,H3K4me1_Enh;E047,H3K4me1_Enh;E048,H3K4me1_Enh;E053,H3K4me1_Enh;E056,H3K4me1_Enh;E057,H3K4me1_Enh;E058,H3K4me1_Enh;E063,H3K4me1_Enh;E065,H3K…	E032;E091	.	BCL_disc7;GR_known10;NRSF_disc7	ENSG00000227920.2	3	735	RP1-153P14.5	5715	no protein, long intergenic non-preotein coding RNA
5	163758502	rs7447422	T	C	0	0.01	0	0.01	0	0	E017,7_Enh;E026,7_Enh;E031,7_Enh;E032,7_Enh;E046,7_Enh;E076,7_Enh;E080,7_Enh;E104,7_Enh;E113,7_Enh;E117,7_Enh;E122,7_Enh;E129,7_Enh	E017,15_EnhAF;E029,17_EnhW2;E031,18_EnhAc;E032,15_EnhAF;E034,15_EnhAF;E046,13_EnhA1;E052,17_EnhW2;E080,19_DNase;E089,17_EnhW2;E091,17_EnhW2;E114,17_EnhW2;E116,17_EnhW2;E117,18_EnhAc;E122,13_EnhA1;E125,15_EnhAF;E128,15_EnhAF;E129,17_EnhW2	E010,H3K4me1_Enh;E017,H3K4me1_Enh;E023,H3K4me1_Enh;E025,H3K4me1_Enh;E026,H3K4me1_Enh;E031,H3K4me1_Enh;E032,H3K4me1_Enh;E046,H3K4me1_Enh;E076,H3K4me1_Enh;E080,H3K4me1_Enh;E086,H3K4me1_Enh;E090,H3K4me1_Enh;E092,H3K4me1_Enh;E096,H3K4me1_Enh;E113,H3K4me1_Enh;E117,H3K4me1_Enh;E122,H3K4me1_Enh;E125,H3K4me1_Enh;E128,H3K4me1_Enh;E129,H3K4me1_Enh;E017,H3K27ac_Enh;E034,H3K27ac_Enh;E046,H3K27ac_Enh;E080,H3K…	E056;E090;E122	HUVEC,CFOS,UCD,None;HUVEC,CJUN,Stanford,None;HUVEC,GATA2,UCD,None	Mtf1_2	ENSG00000251998.1	3	37562	U6	89	no protein, small nuclear RNA
6	60376443	rs12210456	G	T					0	0	E018,7_Enh;E019,7_Enh;E074,7_Enh	E061,19_DNase	E003,H3K27ac_Enh;E017,H3K27ac_Enh;E129,H3K27ac_Enh;E014,H3K4me1_Enh;E015,H3K4me1_Enh;E016,H3K4me1_Enh;E018,H3K4me1_Enh;E019,H3K4me1_Enh;E025,H3K4me1_Enh;E071,H3K4me1_Enh;E074,H3K4me1_Enh;E087,H3K4me1_Enh;E103,H3K4me1_Enh;E129,H3K4me1_Enh	E059	.	.	ENSG00000146143.12	0	0	PRIM2	332044	gene
2	159213245	rs13022357	A	G	0.68	0.88	0.67	0.88	0	0	E019,12_EnhBiv;E024,12_EnhBiv;E083,7_Enh;E121,7_Enh	E005,19_DNase;E099,18_EnhAc	E001,H3K4me1_Enh;E003,H3K4me1_Enh;E010,H3K4me1_Enh;E012,H3K4me1_Enh;E013,H3K4me1_Enh;E014,H3K4me1_Enh;E015,H3K4me1_Enh;E016,H3K4me1_Enh;E018,H3K4me1_Enh;E019,H3K4me1_Enh;E020,H3K4me1_Enh;E021,H3K4me1_Enh;E024,H3K4me1_Enh;E046,H3K4me1_Enh;E047,H3K4me1_Enh;E067,H3K4me1_Enh;E071,H3K4me1_Enh;E078,H3K4me1_Enh;E083,H3K4me1_Enh;E086,H3K4me1_Enh;E091,H3K4me1_Enh;E099,H3K4me1_Enh;E113,H3K4me1_Enh;E121,H3K…	E005;E091	.	Nkx2_6;TATA_known4	ENSG00000115183.9	0	0	TANC1	264025	gene
20	43046994	rs2425566	C	G	0.71	0.34	0.24	0.19	1	0	E019,7_Enh;E020,7_Enh;E024,7_Enh		E012,H3K4me1_Enh;E016,H3K4me1_Enh;E019,H3K4me1_Enh;E020,H3K4me1_Enh;E024,H3K4me1_Enh;E027,H3K4me1_Enh;E020,H3K4me3_Pro;E106,H3K4me3_Pro		.	.	ENSG00000196090.7	0	0	PTPRT	1117218	gene
20	43047502	rs2425567	G	C	0.38	0.38	0.36	0.21	1	0	E019,7_Enh;E020,7_Enh;E024,7_Enh		E012,H3K4me1_Enh;E016,H3K4me1_Enh;E019,H3K4me1_Enh;E020,H3K4me1_Enh;E024,H3K4me1_Enh;E027,H3K4me1_Enh;E106,H3K4me3_Pro	E003	.	AP-1_disc10;E2F_disc3;Nkx2_2;Roaz_2;SP1_disc3;ZBTB7A_known2	ENSG00000196090.7	0	0	PTPRT	1117218	gene
6	60484026	rs9396341	A	G					0	0	E020,7_Enh	E011,22_PromP	E004,H3K4me1_Enh;E011,H3K4me1_Enh;E014,H3K4me1_Enh;E019,H3K4me1_Enh;E020,H3K4me1_Enh;E011,H3K4me3_Pro;E083,H3K4me3_Pro;E100,H3K4me3_Pro;E056,H3K27ac_Enh	E008	.	Crx_1;Hic1_3;Hoxd8;TATA_disc1;THAP1_disc1;YY1_disc1;YY1_known3	ENSG00000146143.12	0	0	PRIM2	332044	gene
6	60517556	rs12193305	T	C					0	0	E021,7_Enh		E011,H3K4me3_Pro;E083,H3K4me3_Pro;E021,H3K27ac_Enh;E022,H3K4me1_Enh		.	TFIIA	ENSG00000146143.12	0	0	PRIM2	332044	gene
20	62013573	rs7273659	C	T	0.19	0.03	0.02	0.01	0	0	E022,6_EnhG;E056,3_TxFlnk;E095,6_EnhG		E005,H3K4me1_Enh;E006,H3K4me1_Enh;E007,H3K4me1_Enh;E022,H3K4me1_Enh;E027,H3K4me1_Enh;E034,H3K4me1_Enh;E079,H3K4me1_Enh;E089,H3K4me1_Enh;E094,H3K4me1_Enh;E098,H3K4me1_Enh;E099,H3K4me1_Enh;E105,H3K4me1_Enh;E108,H3K4me1_Enh;E111,H3K4me1_Enh;E113,H3K4me1_Enh;E005,H3K4me3_Pro;E055,H3K4me3_Pro;E056,H3K4me3_Pro;E059,H3K4me3_Pro;E094,H3K4me3_Pro;E113,H3K4me3_Pro;E007,H3K27ac_Enh;E015,H3K27ac_Enh;E022,H3K…	E032;E118;E124	.	AP-2_known5;HIF1;Myc_disc9;Rad21_disc7;p53_1	ENSG00000130699.10	0	0	TAF4	112341	gene
16	24306535	rs1859199	C	G	0.39	0.15	0.01	0.3	0	0	E022,7_Enh		E007,H3K9ac_Pro;E011,H3K27ac_Enh;E105,H3K27ac_Enh;E022,H3K4me1_Enh;E067,H3K4me1_Enh;E117,H3K4me1_Enh	E086;E119	.	Rad21_disc3	ENSG00000006116.3	0	0	CACNG3	107248	gene
16	24306981	rs9926669	T	A	0.45	0.16	0.01	0.3	0	0	E022,7_Enh;E117,7_Enh		E007,H3K9ac_Pro;E117,H3K9ac_Pro;E011,H3K27ac_Enh;E022,H3K4me1_Enh;E067,H3K4me1_Enh;E117,H3K4me1_Enh	E080	.	NRSF_known1	ENSG00000006116.3	0	0	CACNG3	107248	gene
2	159228023	rs2288111	A	G	0.65	0.87	0.67	0.88	0	0	E023,2_TssAFlnk;E025,2_TssAFlnk;E034,7_Enh;E038,7_Enh;E046,7_Enh;E047,7_Enh;E048,7_Enh;E052,2_TssAFlnk;E055,2_TssAFlnk;E056,2_TssAFlnk;E059,7_Enh;E061,6_EnhG;E063,6_EnhG;E068,7_Enh;E069,7_Enh;E071,7_Enh;E074,7_Enh;E081,7_Enh;E083,7_Enh;E089,6_EnhG;E090,6_EnhG;E095,6_EnhG;E105,6_EnhG;E108,7_Enh;E115,7_Enh;E126,2_TssAFlnk	E007,11_TxEnh3;E011,17_EnhW2;E012,11_TxEnh3;E013,11_TxEnh3;E023,13_EnhA1;E025,13_EnhA1;E029,11_TxEnh3;E032,17_EnhW2;E033,17_EnhW2;E034,15_EnhAF;E037,17_EnhW2;E038,17_EnhW2;E043,17_EnhW2;E046,15_EnhAF;E047,15_EnhAF;E048,17_EnhW2;E052,13_EnhA1;E053,11_TxEnh3;E054,11_TxEnh3;E055,13_EnhA1;E056,13_EnhA1;E059,11_TxEnh3;E061,13_EnhA1;E063,11_TxEnh3;E067,14_EnhA2;E068,14_EnhA2;E069,13_EnhA1;E070,11_TxEnh…	E002,H3K4me1_Enh;E006,H3K4me1_Enh;E007,H3K4me1_Enh;E010,H3K4me1_Enh;E011,H3K4me1_Enh;E012,H3K4me1_Enh;E013,H3K4me1_Enh;E016,H3K4me1_Enh;E021,H3K4me1_Enh;E023,H3K4me1_Enh;E025,H3K4me1_Enh;E034,H3K4me1_Enh;E037,H3K4me1_Enh;E038,H3K4me1_Enh;E039,H3K4me1_Enh;E041,H3K4me1_Enh;E043,H3K4me1_Enh;E046,H3K4me1_Enh;E047,H3K4me1_Enh;E048,H3K4me1_Enh;E052,H3K4me1_Enh;E055,H3K4me1_Enh;E056,H3K4me1_Enh;E059,H3K…	E055;E056;E059;E126	.	.	ENSG00000115183.9	0	0	TANC1	264025	gene
6	100414551	rs3798500	T	C	0.07	0.13	0.21	0.08	0	0	E023,7_Enh		E023,H3K4me1_Enh;E025,H3K4me1_Enh;E055,H3K4me1_Enh;E063,H3K4me1_Enh;E087,H3K4me1_Enh;E115,H3K4me1_Enh;E023,H3K9ac_Pro;E120,H3K9ac_Pro;E040,H3K4me3_Pro;E063,H3K27ac_Enh		.	Foxa_disc4;Pax-6_1;Pou1f1_1;Pou3f2_2;STAT_disc5;TATA_known3	ENSG00000112246.5	0	0	SIM1	79914	gene
2	56595279	rs2042123	A	G	0.88	0.91	0.94	0.86	0	0	E023,7_Enh	E023,22_PromP	E021,H3K27ac_Enh;E063,H3K27ac_Enh;E023,H3K4me1_Enh;E063,H3K4me1_Enh;E023,H3K4me3_Pro;E040,H3K4me3_Pro;E023,H3K9ac_Pro		.	BATF_disc2;Foxa_disc5;NF-kappaB_disc4;Pou2f2_known6	ENSG00000055813.4	3	209105	CCDC85A	202050	gene
4	1122838	rs17164353	G	A	0.01	0.01	0	0.03	0	0	E023,7_Enh;E025,7_Enh	E025,16_EnhW1	E008,H3K4me3_Pro;E098,H3K4me3_Pro;E008,H3K9ac_Pro;E027,H3K9ac_Pro;E023,H3K4me1_Enh;E025,H3K4me1_Enh;E056,H3K4me1_Enh;E077,H3K4me1_Enh;E096,H3K4me1_Enh;E098,H3K4me1_Enh;E102,H3K4me1_Enh;E109,H3K4me1_Enh;E110,H3K4me1_Enh;E105,H3K27ac_Enh	E126	PBDE,GATA1,UCD,None	DBP	ENSG00000251652.1	0	0	RP11-20I20.2	19338	no protein, long intergenic non-preotein coding RNA
6	148623191	rs9390589	G	A	0.39	0.18	0.1	0.31	0	0	E023,7_Enh;E025,7_Enh;E027,7_Enh;E076,7_Enh		E023,H3K4me1_Enh;E025,H3K4me1_Enh;E027,H3K4me1_Enh;E056,H3K4me1_Enh;E063,H3K4me1_Enh;E076,H3K4me1_Enh;E088,H3K4me1_Enh;E107,H3K4me1_Enh;E108,H3K4me1_Enh;E124,H3K4me1_Enh;E023,H3K4me3_Pro;E063,H3K27ac_Enh;E089,H3K27ac_Enh	E089;E090	.	Hoxb3;Pou6f1_2;RFX5_known1	ENSG00000111961.12	3	71140	SASH1	279746	gene
2	159227713	rs2042494	G	A	0.66	0.87	0.67	0.88	0	0	E023,7_Enh;E025,7_Enh;E034,7_Enh;E038,7_Enh;E039,7_Enh;E046,7_Enh;E047,7_Enh;E048,7_Enh;E052,7_Enh;E055,7_Enh;E056,7_Enh;E061,6_EnhG;E068,7_Enh;E069,7_Enh;E071,7_Enh;E074,7_Enh;E083,7_Enh;E090,6_EnhG;E095,6_EnhG;E105,6_EnhG;E115,7_Enh;E126,2_TssAFlnk	E011,17_EnhW2;E013,11_TxEnh3;E023,13_EnhA1;E025,13_EnhA1;E032,17_EnhW2;E034,15_EnhAF;E037,17_EnhW2;E038,17_EnhW2;E043,17_EnhW2;E046,18_EnhAc;E047,18_EnhAc;E048,17_EnhW2;E052,13_EnhA1;E055,13_EnhA1;E056,11_TxEnh3;E059,11_TxEnh3;E061,11_TxEnh3;E063,17_EnhW2;E067,15_EnhAF;E068,15_EnhAF;E069,14_EnhA2;E071,14_EnhA2;E072,15_EnhAF;E073,15_EnhAF;E074,14_EnhA2;E081,18_EnhAc;E083,11_TxEnh3;E089,11_TxEnh3;E…	E001,H3K4me1_Enh;E002,H3K4me1_Enh;E006,H3K4me1_Enh;E007,H3K4me1_Enh;E010,H3K4me1_Enh;E011,H3K4me1_Enh;E012,H3K4me1_Enh;E013,H3K4me1_Enh;E016,H3K4me1_Enh;E021,H3K4me1_Enh;E023,H3K4me1_Enh;E025,H3K4me1_Enh;E034,H3K4me1_Enh;E037,H3K4me1_Enh;E038,H3K4me1_Enh;E039,H3K4me1_Enh;E041,H3K4me1_Enh;E043,H3K4me1_Enh;E046,H3K4me1_Enh;E047,H3K4me1_Enh;E048,H3K4me1_Enh;E052,H3K4me1_Enh;E053,H3K4me1_Enh;E055,H3K…	E046;E055;E126	.	CEBPG;Mrg_1	ENSG00000115183.9	0	0	TANC1	264025	gene
2	159227752	rs2042495	A	G	0.65	0.87	0.67	0.88	0	0	E023,7_Enh;E025,7_Enh;E034,7_Enh;E038,7_Enh;E039,7_Enh;E046,7_Enh;E047,7_Enh;E048,7_Enh;E052,7_Enh;E055,7_Enh;E056,7_Enh;E061,6_EnhG;E068,7_Enh;E069,7_Enh;E071,7_Enh;E074,7_Enh;E083,7_Enh;E090,6_EnhG;E095,6_EnhG;E105,6_EnhG;E115,7_Enh;E126,2_TssAFlnk	E011,17_EnhW2;E013,11_TxEnh3;E023,13_EnhA1;E025,13_EnhA1;E032,17_EnhW2;E034,15_EnhAF;E037,17_EnhW2;E038,17_EnhW2;E043,17_EnhW2;E046,18_EnhAc;E047,18_EnhAc;E048,17_EnhW2;E052,13_EnhA1;E055,13_EnhA1;E056,11_TxEnh3;E059,11_TxEnh3;E061,11_TxEnh3;E063,17_EnhW2;E067,15_EnhAF;E068,15_EnhAF;E069,14_EnhA2;E071,14_EnhA2;E072,15_EnhAF;E073,15_EnhAF;E074,14_EnhA2;E081,18_EnhAc;E083,11_TxEnh3;E089,11_TxEnh3;E…	E002,H3K4me1_Enh;E006,H3K4me1_Enh;E007,H3K4me1_Enh;E010,H3K4me1_Enh;E011,H3K4me1_Enh;E012,H3K4me1_Enh;E013,H3K4me1_Enh;E016,H3K4me1_Enh;E021,H3K4me1_Enh;E023,H3K4me1_Enh;E025,H3K4me1_Enh;E034,H3K4me1_Enh;E037,H3K4me1_Enh;E038,H3K4me1_Enh;E039,H3K4me1_Enh;E041,H3K4me1_Enh;E043,H3K4me1_Enh;E046,H3K4me1_Enh;E047,H3K4me1_Enh;E048,H3K4me1_Enh;E052,H3K4me1_Enh;E053,H3K4me1_Enh;E055,H3K4me1_Enh;E056,H3K…	E046;E126	.	CACD_2;Egr-1_disc4;Pax-4_4;TCF12_disc1;TR4_disc1;ZEB1_disc1;ZEB1_known3;Znf143_disc3	ENSG00000115183.9	0	0	TANC1	264025	gene
6	148608523	rs9689369	A	G	0.08	0.14	0.05	0.25	0	0	E023,7_Enh;E055,7_Enh;E056,7_Enh;E076,7_Enh;E107,7_Enh;E126,7_Enh	E023,19_DNase;E025,19_DNase;E055,19_DNase;E056,16_EnhW1;E059,19_DNase;E083,19_DNase;E128,19_DNase;E129,19_DNase	E002,H3K4me1_Enh;E023,H3K4me1_Enh;E025,H3K4me1_Enh;E027,H3K4me1_Enh;E055,H3K4me1_Enh;E056,H3K4me1_Enh;E078,H3K4me1_Enh;E096,H3K4me1_Enh;E100,H3K4me1_Enh;E103,H3K4me1_Enh;E107,H3K4me1_Enh;E108,H3K4me1_Enh;E126,H3K4me1_Enh;E068,H3K27ac_Enh;E103,H3K27ac_Enh;E099,H3K4me3_Pro	E008;E055;E059	.	Gfi1_1;Hdx	ENSG00000111961.12	3	56472	SASH1	279746	gene
6	100414175	rs17060534	G	A	0.07	0.13	0.21	0.08	0	0	E023,7_Enh;E063,7_Enh		E004,H3K4me1_Enh;E023,H3K4me1_Enh;E025,H3K4me1_Enh;E055,H3K4me1_Enh;E063,H3K4me1_Enh;E087,H3K4me1_Enh;E055,H3K27ac_Enh;E063,H3K27ac_Enh;E083,H3K4me3_Pro		.	Foxd3	ENSG00000112246.5	0	0	SIM1	79914	gene
20	3849827	rs6084497	T	C	0.54	0.31	0.69	0.27	1	0	E023,7_Enh;E083,7_Enh;E107,7_Enh;E108,7_Enh;E114,6_EnhG;E118,7_Enh	E037,12_TxEnhW	E005,H3K4me1_Enh;E017,H3K4me1_Enh;E023,H3K4me1_Enh;E025,H3K4me1_Enh;E026,H3K4me1_Enh;E027,H3K4me1_Enh;E028,H3K4me1_Enh;E033,H3K4me1_Enh;E034,H3K4me1_Enh;E037,H3K4me1_Enh;E038,H3K4me1_Enh;E039,H3K4me1_Enh;E041,H3K4me1_Enh;E042,H3K4me1_Enh;E043,H3K4me1_Enh;E045,H3K4me1_Enh;E047,H3K4me1_Enh;E048,H3K4me1_Enh;E050,H3K4me1_Enh;E053,H3K4me1_Enh;E055,H3K4me1_Enh;E061,H3K4me1_Enh;E067,H3K4me1_Enh;E068,H3K…		.	AFP1;Arid5b;Pou5f1_known2;TATA_known3	ENSG00000088888.13	0	0	MAVS	29324	gene
2	182291059	rs16823011	T	C	0.28	0.23	0.43	0.21	0	0	E023,7_Enh;E104,7_Enh		E008,H3K27ac_Enh;E023,H3K4me1_Enh;E025,H3K4me1_Enh;E049,H3K4me1_Enh;E073,H3K4me1_Enh;E104,H3K4me1_Enh		.	Foxq1;Hbp1;Hoxd10;Pbx-1_2	ENSG00000115252.14	0	0	PDE1A	383156	gene
7	136046288	rs2129800	C	T	0.05	0.36	0.44	0.23	0	0	E023,7_Enh;E123,7_Enh	E023,22_PromP;E052,19_DNase;E121,19_DNase;E125,19_DNase	E006,H3K9ac_Pro;E023,H3K9ac_Pro;E121,H3K9ac_Pro;E023,H3K4me1_Enh;E052,H3K4me1_Enh;E090,H3K4me1_Enh;E120,H3K4me1_Enh;E121,H3K4me1_Enh;E123,H3K4me1_Enh;E096,H3K4me3_Pro;E104,H3K27ac_Enh;E106,H3K27ac_Enh;E113,H3K27ac_Enh;E121,H3K27ac_Enh	E097;E120;E123	.	.	ENSG00000230649.1	0	0	AC024084.1	455	bacterial clone
13	34594471	rs7325039	G	A	0.33	0.05	0.06	0.07	0	0	E024,7_Enh;E081,7_Enh		E003,H3K9ac_Pro;E008,H3K4me1_Enh;E012,H3K4me1_Enh;E014,H3K4me1_Enh;E016,H3K4me1_Enh;E024,H3K4me1_Enh;E081,H3K4me1_Enh;E087,H3K4me1_Enh;E088,H3K4me1_Enh;E100,H3K4me1_Enh;E104,H3K4me1_Enh;E108,H3K4me1_Enh;E113,H3K4me3_Pro		.	SIX5_known2	ENSG00000225179.1	0	0	LINC00457	205235	no protein, long intergenic non-preotein coding RNA
10	29600512	rs2488682	A	G	0.38	0.38	0.21	0.53	0	0	E025,7_Enh;E026,7_Enh;E027,7_Enh;E028,7_Enh;E049,7_Enh;E055,7_Enh;E057,7_Enh;E058,7_Enh;E076,7_Enh;E078,7_Enh;E083,7_Enh;E090,7_Enh;E097,7_Enh;E100,7_Enh;E103,7_Enh;E104,7_Enh;E107,7_Enh;E108,7_Enh;E111,6_EnhG;E119,7_Enh;E125,7_Enh;E126,7_Enh;E127,7_Enh;E129,7_Enh	E001,19_DNase;E002,19_DNase;E011,19_DNase;E017,19_DNase;E023,17_EnhW2;E025,17_EnhW2;E026,17_EnhW2;E027,17_EnhW2;E028,15_EnhAF;E049,17_EnhW2;E052,17_EnhW2;E055,18_EnhAc;E056,17_EnhW2;E057,15_EnhAF;E058,15_EnhAF;E063,17_EnhW2;E065,15_EnhAF;E076,10_TxEnh5;E078,10_TxEnh5;E079,17_EnhW2;E083,15_EnhAF;E089,17_EnhW2;E090,10_TxEnh5;E095,12_TxEnhW;E097,15_EnhAF;E099,17_EnhW2;E100,15_EnhAF;E103,10_TxEnh5;E1…	E001,H3K4me1_Enh;E005,H3K4me1_Enh;E006,H3K4me1_Enh;E013,H3K4me1_Enh;E016,H3K4me1_Enh;E018,H3K4me1_Enh;E023,H3K4me1_Enh;E025,H3K4me1_Enh;E026,H3K4me1_Enh;E027,H3K4me1_Enh;E028,H3K4me1_Enh;E041,H3K4me1_Enh;E049,H3K4me1_Enh;E055,H3K4me1_Enh;E056,H3K4me1_Enh;E057,H3K4me1_Enh;E058,H3K4me1_Enh;E063,H3K4me1_Enh;E065,H3K4me1_Enh;E067,H3K4me1_Enh;E070,H3K4me1_Enh;E076,H3K4me1_Enh;E078,H3K4me1_Enh;E079,H3K…	E028;E057;E097;E119;E125;E127	.	TAL1_known1	ENSG00000197321.9	0	0	SVIL	279443	gene
10	29600761	rs2505898	T	C	0.25	0.37	0.21	0.53	0	0	E025,7_Enh;E026,7_Enh;E028,7_Enh;E049,7_Enh;E055,7_Enh;E057,7_Enh;E058,7_Enh;E076,7_Enh;E083,7_Enh;E088,7_Enh;E097,7_Enh;E100,7_Enh;E103,7_Enh;E107,7_Enh;E108,7_Enh;E119,7_Enh;E125,7_Enh;E126,7_Enh;E127,7_Enh;E129,7_Enh	E001,19_DNase;E011,19_DNase;E017,19_DNase;E023,17_EnhW2;E025,17_EnhW2;E026,17_EnhW2;E027,17_EnhW2;E028,15_EnhAF;E042,17_EnhW2;E049,17_EnhW2;E052,17_EnhW2;E055,18_EnhAc;E056,17_EnhW2;E057,15_EnhAF;E058,15_EnhAF;E063,17_EnhW2;E065,18_EnhAc;E076,10_TxEnh5;E078,18_EnhAc;E079,17_EnhW2;E083,18_EnhAc;E095,17_EnhW2;E097,15_EnhAF;E099,17_EnhW2;E100,18_EnhAc;E103,12_TxEnhW;E105,18_EnhAc;E107,15_EnhAF;E108,…	E001,H3K4me1_Enh;E005,H3K4me1_Enh;E006,H3K4me1_Enh;E013,H3K4me1_Enh;E016,H3K4me1_Enh;E018,H3K4me1_Enh;E025,H3K4me1_Enh;E026,H3K4me1_Enh;E027,H3K4me1_Enh;E028,H3K4me1_Enh;E041,H3K4me1_Enh;E049,H3K4me1_Enh;E050,H3K4me1_Enh;E051,H3K4me1_Enh;E055,H3K4me1_Enh;E056,H3K4me1_Enh;E057,H3K4me1_Enh;E058,H3K4me1_Enh;E065,H3K4me1_Enh;E067,H3K4me1_Enh;E070,H3K4me1_Enh;E076,H3K4me1_Enh;E078,H3K4me1_Enh;E079,H3K…		.	DMRT7	ENSG00000197321.9	0	0	SVIL	279443	gene
10	29600773	rs2505899	T	C	0.25	0.37	0.21	0.53	0	0	E025,7_Enh;E026,7_Enh;E028,7_Enh;E049,7_Enh;E055,7_Enh;E057,7_Enh;E058,7_Enh;E076,7_Enh;E083,7_Enh;E088,7_Enh;E097,7_Enh;E100,7_Enh;E103,7_Enh;E107,7_Enh;E108,7_Enh;E119,7_Enh;E125,7_Enh;E126,7_Enh;E127,7_Enh;E129,7_Enh	E001,19_DNase;E011,19_DNase;E017,19_DNase;E023,17_EnhW2;E025,17_EnhW2;E026,17_EnhW2;E027,17_EnhW2;E028,15_EnhAF;E042,17_EnhW2;E049,17_EnhW2;E052,17_EnhW2;E055,18_EnhAc;E056,17_EnhW2;E057,15_EnhAF;E058,15_EnhAF;E063,17_EnhW2;E065,18_EnhAc;E076,10_TxEnh5;E078,18_EnhAc;E079,17_EnhW2;E083,18_EnhAc;E095,17_EnhW2;E097,15_EnhAF;E099,17_EnhW2;E100,18_EnhAc;E103,12_TxEnhW;E105,18_EnhAc;E107,15_EnhAF;E108,…	E001,H3K4me1_Enh;E005,H3K4me1_Enh;E006,H3K4me1_Enh;E013,H3K4me1_Enh;E016,H3K4me1_Enh;E018,H3K4me1_Enh;E025,H3K4me1_Enh;E026,H3K4me1_Enh;E027,H3K4me1_Enh;E028,H3K4me1_Enh;E041,H3K4me1_Enh;E049,H3K4me1_Enh;E050,H3K4me1_Enh;E051,H3K4me1_Enh;E055,H3K4me1_Enh;E056,H3K4me1_Enh;E057,H3K4me1_Enh;E058,H3K4me1_Enh;E065,H3K4me1_Enh;E067,H3K4me1_Enh;E070,H3K4me1_Enh;E076,H3K4me1_Enh;E078,H3K4me1_Enh;E079,H3K…	E057;E128	.	Ets_disc6;Foxj1_1	ENSG00000197321.9	0	0	SVIL	279443	gene
5	174386345	rs2964037	G	A	0.36	0.04	0.09	0.04	0	0	E025,7_Enh;E099,7_Enh;E126,7_Enh	E013,19_DNase;E017,19_DNase;E023,15_EnhAF;E025,18_EnhAc;E026,17_EnhW2;E049,18_EnhAc;E052,19_DNase;E117,19_DNase;E121,19_DNase;E122,19_DNase;E125,18_EnhAc;E126,19_DNase;E129,18_EnhAc	E012,H3K4me1_Enh;E013,H3K4me1_Enh;E017,H3K4me1_Enh;E023,H3K4me1_Enh;E025,H3K4me1_Enh;E026,H3K4me1_Enh;E049,H3K4me1_Enh;E099,H3K4me1_Enh;E104,H3K4me1_Enh;E108,H3K4me1_Enh;E117,H3K4me1_Enh;E125,H3K4me1_Enh;E129,H3K4me1_Enh;E023,H3K9ac_Pro;E025,H3K9ac_Pro;E026,H3K27ac_Enh;E099,H3K27ac_Enh;E125,H3K27ac_Enh;E129,H3K27ac_Enh	E125;E128	.	CDP_4;Ets_known1;Foxp3;Ik-2_1;MZF1::1-4_2;MZF1::1-4_3	ENSG00000249306.1	0	0	RP11-267A15.1	196162	no protein, long intergenic non-preotein coding RNA
10	3820322	rs11252121	G	A	0.15	0.09	0.08	0.13	0	0	E026,7_Enh;E049,1_TssA;E052,7_Enh;E055,7_Enh;E057,7_Enh;E091,7_Enh;E120,7_Enh;E121,7_Enh;E129,7_Enh	E023,18_EnhAc;E026,13_EnhA1;E027,19_DNase;E028,19_DNase;E049,14_EnhA2;E052,16_EnhW1;E055,16_EnhW1;E056,17_EnhW2;E057,19_DNase;E058,19_DNase;E059,19_DNase;E061,19_DNase;E099,19_DNase;E120,17_EnhW2;E121,15_EnhAF;E125,18_EnhAc;E126,15_EnhAF;E127,19_DNase;E128,19_DNase;E129,15_EnhAF	E001,H3K4me1_Enh;E011,H3K4me1_Enh;E013,H3K4me1_Enh;E022,H3K4me1_Enh;E026,H3K4me1_Enh;E049,H3K4me1_Enh;E052,H3K4me1_Enh;E055,H3K4me1_Enh;E056,H3K4me1_Enh;E057,H3K4me1_Enh;E058,H3K4me1_Enh;E091,H3K4me1_Enh;E099,H3K4me1_Enh;E113,H3K4me1_Enh;E120,H3K4me1_Enh;E121,H3K4me1_Enh;E125,H3K4me1_Enh;E129,H3K4me1_Enh;E004,H3K27ac_Enh;E011,H3K27ac_Enh;E013,H3K27ac_Enh;E026,H3K27ac_Enh;E055,H3K27ac_Enh;E056,H3K…	E055;E056;E057;E091;E121	.	.	ENSG00000230573.1	5	13627	RP11-464C19.2	778	no protein, long intergenic non-preotein coding RNA
6	33709545	rs17527406	G	C	0.04	0.04	0	0.02	0	0	E027,6_EnhG;E033,6_EnhG;E051,6_EnhG;E053,6_EnhG;E055,6_EnhG;E057,6_EnhG;E058,6_EnhG;E073,7_Enh;E080,6_EnhG;E081,7_Enh;E082,1_TssA;E083,7_Enh;E088,7_Enh;E090,6_EnhG;E093,6_EnhG;E095,7_Enh;E096,6_EnhG;E098,6_EnhG;E107,7_Enh;E108,6_EnhG;E115,6_EnhG;E116,6_EnhG;E118,6_EnhG;E127,6_EnhG	E054,11_TxEnh3;E055,10_TxEnh5;E058,10_TxEnh5;E067,18_EnhAc;E068,10_TxEnh5;E069,17_EnhW2;E070,11_TxEnh3;E071,12_TxEnhW;E072,10_TxEnh5;E073,10_TxEnh5;E081,9_TxReg;E082,9_TxReg;E083,9_TxReg;E095,14_EnhA2;E100,18_EnhAc;E104,15_EnhAF;E105,15_EnhAF;E107,9_TxReg;E108,9_TxReg;E116,12_TxEnhW	E001,H3K4me1_Enh;E004,H3K4me1_Enh;E006,H3K4me1_Enh;E011,H3K4me1_Enh;E012,H3K4me1_Enh;E016,H3K4me1_Enh;E018,H3K4me1_Enh;E019,H3K4me1_Enh;E020,H3K4me1_Enh;E023,H3K4me1_Enh;E024,H3K4me1_Enh;E025,H3K4me1_Enh;E026,H3K4me1_Enh;E027,H3K4me1_Enh;E028,H3K4me1_Enh;E031,H3K4me1_Enh;E032,H3K4me1_Enh;E033,H3K4me1_Enh;E034,H3K4me1_Enh;E036,H3K4me1_Enh;E037,H3K4me1_Enh;E038,H3K4me1_Enh;E039,H3K4me1_Enh;E040,H3K…	E081;E082;E083	.	RAR	ENSG00000137288.4	0	0	MNF1	17434	gene
20	43048831	rs2425568	G	C	0.19	0.29	0.24	0.18	0	0	E027,7_Enh		E027,H3K4me1_Enh;E054,H3K4me1_Enh;E096,H3K4me3_Pro		.	AP-2_known1;ELF1_disc3;Egr-1_known3;Ets_disc9;GR_disc6;PPAR_2;Sin3Ak-20_disc7;ZNF219;Zfp281;Zfp740	ENSG00000196090.7	0	0	PTPRT	1117218	gene
20	43049711	rs2425570	C	T	0.75	0.41	0.37	0.21	0	0	E027,7_Enh		E006,H3K9ac_Pro;E027,H3K4me1_Enh;E054,H3K4me1_Enh;E094,H3K4me3_Pro;E096,H3K4me3_Pro		.	Hdx;IRC900814	ENSG00000196090.7	0	0	PTPRT	1117218	gene
20	43049788	rs1106978	G	A	0.63	0.41	0.37	0.21	0	0	E027,7_Enh	E027,22_PromP	E006,H3K9ac_Pro;E027,H3K4me1_Enh;E054,H3K4me1_Enh;E094,H3K4me3_Pro;E096,H3K4me3_Pro		.	.	ENSG00000196090.7	0	0	PTPRT	1117218	gene
14	101556742	rs1190715	T	C	0.86	0.46	0.46	0.48	0	0	E027,7_Enh;E057,12_EnhBiv;E058,12_EnhBiv;E075,7_Enh;E079,7_Enh;E084,7_Enh;E085,6_EnhG;E091,12_EnhBiv;E092,12_EnhBiv;E096,7_Enh;E097,6_EnhG;E101,7_Enh;E102,7_Enh;E114,7_Enh	E027,23_PromBiv	E005,H3K4me1_Enh;E007,H3K4me1_Enh;E011,H3K4me1_Enh;E022,H3K4me1_Enh;E023,H3K4me1_Enh;E027,H3K4me1_Enh;E057,H3K4me1_Enh;E058,H3K4me1_Enh;E063,H3K4me1_Enh;E066,H3K4me1_Enh;E071,H3K4me1_Enh;E074,H3K4me1_Enh;E075,H3K4me1_Enh;E077,H3K4me1_Enh;E078,H3K4me1_Enh;E079,H3K4me1_Enh;E080,H3K4me1_Enh;E084,H3K4me1_Enh;E085,H3K4me1_Enh;E089,H3K4me1_Enh;E091,H3K4me1_Enh;E092,H3K4me1_Enh;E094,H3K4me1_Enh;E096,H3K…	E029	HeLa-S3,AP2GAMMA,UCD,None	LBP-9	ENSG00000258498.1	0	0	DIO3OS	8210	gene
20	43056397	rs713108	G	A	0.68	0.41	0.37	0.21	0	0	E027,7_Enh;E076,7_Enh;E098,7_Enh		E007,H3K27ac_Enh;E007,H3K4me3_Pro;E094,H3K4me3_Pro;E027,H3K4me1_Enh;E076,H3K4me1_Enh;E098,H3K4me1_Enh;E099,H3K4me1_Enh;E113,H3K4me1_Enh		.	NF-E2_disc3	ENSG00000196090.7	0	0	PTPRT	1117218	gene
2	136657212	rs1838752	T	C	0.26	0.3	0.77	0.23	0	0	E027,7_Enh;E119,7_Enh		E027,H3K4me1_Enh;E028,H3K4me1_Enh;E058,H3K4me1_Enh;E119,H3K4me1_Enh;E093,H3K27ac_Enh		.	Evi-1_4	ENSG00000221762.1	5	12019	AC092786.1	0	sequencing in progress
17	65781795	rs7225471	T	C	0.29	0.5	0.22	0.65	0	0	E028,7_Enh		E028,H3K4me1_Enh;E129,H3K4me1_Enh;E056,H3K27ac_Enh		.	GATA_known12;Smad4	ENSG00000154240.12	0	0	CEP112	556546	gene
13	41260970	rs3818722	A	C,G	0.09	0.15	0.25	0.24	0	0	E028,7_Enh;E057,7_Enh;E058,7_Enh;E118,7_Enh;E119,7_Enh;E127,7_Enh	E028,11_TxEnh3;E057,11_TxEnh3;E058,11_TxEnh3;E127,11_TxEnh3	E028,H3K4me1_Enh;E047,H3K4me1_Enh;E048,H3K4me1_Enh;E057,H3K4me1_Enh;E058,H3K4me1_Enh;E066,H3K4me1_Enh;E085,H3K4me1_Enh;E098,H3K4me1_Enh;E110,H3K4me1_Enh;E111,H3K4me1_Enh;E115,H3K4me1_Enh;E118,H3K4me1_Enh;E119,H3K4me1_Enh;E127,H3K4me1_Enh;E034,H3K27ac_Enh;E047,H3K27ac_Enh;E105,H3K27ac_Enh;E118,H3K27ac_Enh;E066,H3K4me3_Pro;E108,H3K9ac_Pro	E034	.	.	ENSG00000120662.10	0	0	MTRF1	47208	gene
10	33584433	rs1902408	T	C	0.69	0.81	0.69	0.88	0	0	E028,7_Enh;E057,7_Enh;E058,7_Enh;E119,7_Enh;E127,7_Enh	E028,16_EnhW1;E057,17_EnhW2;E058,17_EnhW2;E099,17_EnhW2;E119,17_EnhW2	E005,H3K27ac_Enh;E013,H3K27ac_Enh;E058,H3K27ac_Enh;E005,H3K4me1_Enh;E013,H3K4me1_Enh;E028,H3K4me1_Enh;E057,H3K4me1_Enh;E058,H3K4me1_Enh;E119,H3K4me1_Enh;E125,H3K4me1_Enh;E127,H3K4me1_Enh;E011,H3K4me3_Pro		.	ELF1_known1;PU.1_known2	ENSG00000226412.1	0	0	RP11-476F14.1	21109	no protein, long intergenic non-preotein coding RNA
1	37741125	rs663428	A	G	0.67	0.82	0.77	0.8	0	0	E028,7_Enh;E057,7_Enh;E058,7_Enh;E119,7_Enh;E127,7_Enh	E028,16_EnhW1;E057,17_EnhW2;E058,19_DNase;E119,17_EnhW2;E127,17_EnhW2	E006,H3K4me1_Enh;E010,H3K4me1_Enh;E028,H3K4me1_Enh;E057,H3K4me1_Enh;E058,H3K4me1_Enh;E061,H3K4me1_Enh;E079,H3K4me1_Enh;E092,H3K4me1_Enh;E117,H3K4me1_Enh;E119,H3K4me1_Enh;E127,H3K4me1_Enh;E055,H3K27ac_Enh;E096,H3K4me3_Pro	E028;E057;E119	T-REx-HEK293,ZNF263,UCD,None	AP-1_disc7	ENSG00000183317.11	0	0	EPHA10	51253	gene
18	36327665	rs507163	C	T	0.18	0.54	0.64	0.74	0	0	E028,7_Enh;E083,7_Enh;E116,7_Enh	E083,9_TxReg;E095,17_EnhW2;E104,18_EnhAc;E105,18_EnhAc	E007,H3K4me1_Enh;E014,H3K4me1_Enh;E027,H3K4me1_Enh;E028,H3K4me1_Enh;E049,H3K4me1_Enh;E055,H3K4me1_Enh;E057,H3K4me1_Enh;E083,H3K4me1_Enh;E092,H3K4me1_Enh;E095,H3K4me1_Enh;E104,H3K4me1_Enh;E105,H3K4me1_Enh;E108,H3K4me1_Enh;E116,H3K4me1_Enh;E121,H3K4me1_Enh;E127,H3K4me1_Enh;E007,H3K4me3_Pro;E083,H3K4me3_Pro;E012,H3K27ac_Enh;E020,H3K27ac_Enh;E095,H3K27ac_Enh;E104,H3K27ac_Enh;E105,H3K27ac_Enh;E116,H3K…	E083;E116	.	Evi-1_5;Osf2_2;VDR_3	ENSG00000134775.9	0	0	FHOD3	482341	gene
6	148678318	rs9498113	A	G	0.45	0.79	0.86	0.68	0	0	E029,7_Enh;E031,7_Enh;E032,7_Enh;E035,7_Enh;E036,7_Enh;E046,7_Enh;E050,7_Enh;E051,7_Enh;E116,7_Enh;E124,7_Enh	E025,19_DNase;E029,15_EnhAF;E030,17_EnhW2;E031,15_EnhAF;E032,14_EnhA2;E033,17_EnhW2;E034,19_DNase;E035,17_EnhW2;E036,15_EnhAF;E037,19_DNase;E038,19_DNase;E039,19_DNase;E040,19_DNase;E041,19_DNase;E042,19_DNase;E043,19_DNase;E044,19_DNase;E045,19_DNase;E046,17_EnhW2;E047,19_DNase;E048,19_DNase;E050,18_EnhAc;E051,15_EnhAF;E062,19_DNase;E063,19_DNase;E066,19_DNase;E075,19_DNase;E076,19_DNase;E077,19…	E021,H3K27ac_Enh;E029,H3K27ac_Enh;E032,H3K27ac_Enh;E046,H3K27ac_Enh;E074,H3K27ac_Enh;E093,H3K27ac_Enh;E101,H3K27ac_Enh;E106,H3K27ac_Enh;E113,H3K27ac_Enh;E116,H3K27ac_Enh;E124,H3K27ac_Enh;E029,H3K4me1_Enh;E031,H3K4me1_Enh;E032,H3K4me1_Enh;E035,H3K4me1_Enh;E036,H3K4me1_Enh;E046,H3K4me1_Enh;E050,H3K4me1_Enh;E051,H3K4me1_Enh;E063,H3K4me1_Enh;E077,H3K4me1_Enh;E093,H3K4me1_Enh;E110,H3K4me1_Enh;E116,H3K…	E029;E032;E033;E046;E050;E051;E088;E090;E116;E124	GM12878,BATF,HudsonAlpha,None;GM12878,BCL11A,HudsonAlpha,None;GM12878,EBF1,HudsonAlpha,None;GM12878,EBF1,Stanford,None;GM12878,PU1,HudsonAlpha,None;GM12878,SMC3,Stanford,None;GM12891,PU1,HudsonAlpha,None;GM12892,PAX5C20,HudsonAlpha,None	Foxj2_2;Irf_disc3;Rhox11;TATA_disc7	ENSG00000111962.7	5	69009	UST	329662	gene
6	33017518	rs3130605	T	C	0.03	0.03	0	0.02	0	0	E029,7_Enh;E031,7_Enh;E032,7_Enh;E035,7_Enh;E036,7_Enh;E046,7_Enh;E050,7_Enh;E063,7_Enh;E080,7_Enh;E091,7_Enh;E094,7_Enh;E095,7_Enh;E098,7_Enh;E101,1_TssA;E105,7_Enh;E106,7_Enh;E113,7_Enh;E124,2_TssAFlnk	E029,14_EnhA2;E030,15_EnhAF;E031,14_EnhA2;E032,13_EnhA1;E033,17_EnhW2;E034,15_EnhAF;E035,15_EnhAF;E036,15_EnhAF;E044,17_EnhW2;E046,15_EnhAF;E047,17_EnhW2;E050,15_EnhAF;E051,15_EnhAF;E062,17_EnhW2;E063,22_PromP;E066,17_EnhW2;E068,17_EnhW2;E069,17_EnhW2;E071,16_EnhW1;E075,17_EnhW2;E077,17_EnhW2;E078,17_EnhW2;E080,18_EnhAc;E091,17_EnhW2;E093,15_EnhAF;E094,18_EnhAc;E096,17_EnhW2;E098,15_EnhAF;E100,17…	E004,H3K27ac_Enh;E029,H3K27ac_Enh;E032,H3K27ac_Enh;E040,H3K27ac_Enh;E041,H3K27ac_Enh;E046,H3K27ac_Enh;E047,H3K27ac_Enh;E050,H3K27ac_Enh;E062,H3K27ac_Enh;E063,H3K27ac_Enh;E066,H3K27ac_Enh;E067,H3K27ac_Enh;E068,H3K27ac_Enh;E069,H3K27ac_Enh;E071,H3K27ac_Enh;E072,H3K27ac_Enh;E073,H3K27ac_Enh;E075,H3K27ac_Enh;E078,H3K27ac_Enh;E079,H3K27ac_Enh;E080,H3K27ac_Enh;E084,H3K27ac_Enh;E085,H3K27ac_Enh;E091,H3K…	E032	.	GATA_disc1;GATA_known1;GATA_known12;GATA_known6;Hoxb8;Hoxc9;Hoxd8;Pbx-1_1	ENSG00000204252.8	5	7905	HLA-DOA	5434	gene
6	148649778	rs3885665	T	C	0.86	0.82	0.91	0.69	0	0	E029,7_Enh;E031,7_Enh;E032,7_Enh;E036,7_Enh;E050,7_Enh;E051,7_Enh;E090,7_Enh;E091,7_Enh;E092,7_Enh;E116,7_Enh;E124,2_TssAFlnk	E029,14_EnhA2;E030,15_EnhAF;E031,14_EnhA2;E032,14_EnhA2;E033,17_EnhW2;E035,17_EnhW2;E036,14_EnhA2;E046,17_EnhW2;E050,22_PromP;E051,17_EnhW2;E062,17_EnhW2;E078,17_EnhW2;E093,17_EnhW2;E113,17_EnhW2;E116,17_EnhW2;E124,13_EnhA1	E001,H3K4me3_Pro;E124,H3K4me3_Pro;E006,H3K9ac_Pro;E024,H3K4me1_Enh;E029,H3K4me1_Enh;E031,H3K4me1_Enh;E032,H3K4me1_Enh;E036,H3K4me1_Enh;E046,H3K4me1_Enh;E050,H3K4me1_Enh;E051,H3K4me1_Enh;E063,H3K4me1_Enh;E066,H3K4me1_Enh;E071,H3K4me1_Enh;E078,H3K4me1_Enh;E090,H3K4me1_Enh;E091,H3K4me1_Enh;E092,H3K4me1_Enh;E105,H3K4me1_Enh;E108,H3K4me1_Enh;E116,H3K4me1_Enh;E124,H3K4me1_Enh;E029,H3K27ac_Enh;E032,H3K2…	E032;E089;E124	GM12878,PU1,HudsonAlpha,None;GM12891,PU1,HudsonAlpha,None	CCNT2_disc1;ERalpha-a_known1;GATA_known1;GATA_known2;TAL1_disc1	ENSG00000111962.7	5	97549	UST	329662	gene
6	33056722	rs367645	G	A	0.39	0.08	0	0.03	0	0	E029,7_Enh;E031,7_Enh;E032,7_Enh;E124,7_Enh	E029,18_EnhAc;E030,17_EnhW2;E031,18_EnhAc;E032,13_EnhA1;E034,18_EnhAc;E046,17_EnhW2;E116,15_EnhAF;E124,18_EnhAc	E006,H3K9ac_Pro;E011,H3K4me1_Enh;E029,H3K4me1_Enh;E031,H3K4me1_Enh;E032,H3K4me1_Enh;E036,H3K4me1_Enh;E046,H3K4me1_Enh;E068,H3K4me1_Enh;E113,H3K4me1_Enh;E116,H3K4me1_Enh;E124,H3K4me1_Enh;E032,H3K27ac_Enh;E046,H3K27ac_Enh;E075,H3K27ac_Enh;E093,H3K27ac_Enh;E112,H3K27ac_Enh;E116,H3K27ac_Enh		.	Pax-6_2	ENSG00000231389.2	3	7846	HLA-DPA1	16206	gene
11	13449634	rs986001	C	G	0.67	0.78	0.5	0.84	0	0	E029,7_Enh;E066,7_Enh;E088,7_Enh;E095,7_Enh;E121,7_Enh;E122,7_Enh;E127,7_Enh	E023,10_TxEnh5;E026,12_TxEnhW;E067,12_TxEnhW;E071,12_TxEnhW;E078,12_TxEnhW;E122,10_TxEnh5	E010,H3K4me1_Enh;E020,H3K4me1_Enh;E023,H3K4me1_Enh;E026,H3K4me1_Enh;E027,H3K4me1_Enh;E028,H3K4me1_Enh;E029,H3K4me1_Enh;E030,H3K4me1_Enh;E032,H3K4me1_Enh;E036,H3K4me1_Enh;E037,H3K4me1_Enh;E038,H3K4me1_Enh;E039,H3K4me1_Enh;E040,H3K4me1_Enh;E041,H3K4me1_Enh;E043,H3K4me1_Enh;E044,H3K4me1_Enh;E046,H3K4me1_Enh;E047,H3K4me1_Enh;E049,H3K4me1_Enh;E055,H3K4me1_Enh;E058,H3K4me1_Enh;E063,H3K4me1_Enh;E066,H3K…		U2OS,SETDB1,UCD,None	.	ENSG00000148925.5	0	0	BTBD10	75296	gene
6	148675309	rs6570881	G	A	0.71	0.8	0.87	0.68	0	0	E029,7_Enh;E124,7_Enh	E030,17_EnhW2	E007,H3K27ac_Enh;E011,H3K4me3_Pro;E124,H3K4me3_Pro;E029,H3K4me1_Enh;E036,H3K4me1_Enh;E050,H3K4me1_Enh;E051,H3K4me1_Enh;E124,H3K4me1_Enh;E116,H3K9ac_Pro		.	Arid3a_2;Crx_2;DMRT1;DMRT5;DMRT7;Foxp1;Gsc;HDAC2_disc6;Mef2_known1;Mef2_known3;Mef2_known4;Obox3;Obox6;Otx2	ENSG00000111962.7	5	72018	UST	329662	gene
11	113967397	rs7104827	A	T	0.65	0.62	0.45	0.46	0	0	E031,7_Enh;E032,7_Enh		E031,H3K4me1_Enh;E032,H3K4me1_Enh		.	.	ENSG00000166736.7	5	7483	HTR3A	15432	gene
12	132441696	rs7315939	G	A	0.25	0.33	0.19	0.4	0	0	E031,7_Enh;E032,7_Enh;E034,7_Enh;E036,7_Enh;E039,7_Enh;E041,7_Enh;E047,7_Enh;E089,12_EnhBiv;E090,12_EnhBiv;E092,12_EnhBiv;E118,12_EnhBiv	E034,17_EnhW2;E037,17_EnhW2;E039,17_EnhW2;E041,17_EnhW2;E047,18_EnhAc;E089,23_PromBiv	E005,H3K9ac_Pro;E038,H3K9ac_Pro;E062,H3K9ac_Pro;E075,H3K9ac_Pro;E115,H3K9ac_Pro;E124,H3K9ac_Pro;E022,H3K4me1_Enh;E031,H3K4me1_Enh;E032,H3K4me1_Enh;E034,H3K4me1_Enh;E036,H3K4me1_Enh;E038,H3K4me1_Enh;E039,H3K4me1_Enh;E040,H3K4me1_Enh;E041,H3K4me1_Enh;E042,H3K4me1_Enh;E043,H3K4me1_Enh;E044,H3K4me1_Enh;E046,H3K4me1_Enh;E047,H3K4me1_Enh;E048,H3K4me1_Enh;E050,H3K4me1_Enh;E075,H3K4me1_Enh;E085,H3K4me1_E…	E034	.	GR_known6	ENSG00000256783.1	5	15463	RP11-503G7.1	2864	no protein, long intergenic non-preotein coding RNA
6	33021996	rs9277002	T	A	0.12	0.06	0.02	0.04	0	0	E031,7_Enh;E032,7_Enh;E096,7_Enh	E031,18_EnhAc;E032,18_EnhAc	E006,H3K9ac_Pro;E027,H3K9ac_Pro;E066,H3K9ac_Pro;E067,H3K9ac_Pro;E101,H3K9ac_Pro;E007,H3K4me3_Pro;E059,H3K4me3_Pro;E031,H3K4me1_Enh;E032,H3K4me1_Enh;E043,H3K4me1_Enh;E046,H3K4me1_Enh;E066,H3K4me1_Enh;E071,H3K4me1_Enh;E077,H3K4me1_Enh;E078,H3K4me1_Enh;E096,H3K4me1_Enh;E098,H3K4me1_Enh;E101,H3K4me1_Enh;E109,H3K4me1_Enh;E113,H3K4me1_Enh;E032,H3K27ac_Enh;E043,H3K27ac_Enh;E063,H3K27ac_Enh;E066,H3K27ac_…		.	SREBP_known1	ENSG00000204252.8	5	12383	HLA-DOA	5434	gene
6	33031553	rs3135195	T	G	0.15	0.05	0	0.04	0	0	E031,7_Enh;E032,7_Enh;E116,7_Enh	E029,18_EnhAc;E031,18_EnhAc;E032,15_EnhAF;E034,18_EnhAc;E046,17_EnhW2;E116,18_EnhAc	E023,H3K4me1_Enh;E031,H3K4me1_Enh;E032,H3K4me1_Enh;E048,H3K4me1_Enh;E116,H3K4me1_Enh;E032,H3K27ac_Enh;E043,H3K27ac_Enh;E046,H3K27ac_Enh;E062,H3K27ac_Enh;E076,H3K27ac_Enh;E116,H3K27ac_Enh;E124,H3K27ac_Enh;E066,H3K9ac_Pro;E116,H3K4me3_Pro		.	STAT_known1;STAT_known2	ENSG00000204252.8	5	21940	HLA-DOA	5434	gene
6	33092651	rs7763822	C	T	0.07	0.07	0.07	0.04	0	0	E032,7_Enh		E006,H3K4me3_Pro;E113,H3K4me3_Pro;E007,H3K9ac_Pro;E062,H3K9ac_Pro;E108,H3K9ac_Pro;E024,H3K4me1_Enh;E032,H3K4me1_Enh;E034,H3K4me1_Enh;E038,H3K4me1_Enh;E039,H3K4me1_Enh;E047,H3K4me1_Enh;E051,H3K4me1_Enh;E075,H3K4me1_Enh;E098,H3K4me1_Enh;E113,H3K4me1_Enh;E032,H3K27ac_Enh;E055,H3K27ac_Enh		.	.	ENSG00000223865.5	3	5449	HLA-DPB1	11275	gene
6	33093063	rs7764491	C	G	0.07	0.07	0.07	0.04	0	0	E032,7_Enh		E032,H3K27ac_Enh;E055,H3K27ac_Enh;E032,H3K4me1_Enh;E038,H3K4me1_Enh;E047,H3K4me1_Enh;E098,H3K4me1_Enh;E113,H3K4me1_Enh;E062,H3K9ac_Pro		.	GR_disc5;Myf_1;ZNF263_disc1	ENSG00000223865.5	3	5861	HLA-DPB1	11275	gene
6	33093415	rs9461833	G	A	0.07	0.07	0.07	0.04	0	0	E032,7_Enh		E032,H3K27ac_Enh;E055,H3K27ac_Enh;E032,H3K4me1_Enh;E062,H3K9ac_Pro		.	CEBPB_known4;Pou2f2_known6;Zfp187	ENSG00000223865.5	3	6213	HLA-DPB1	11275	gene
3	113927810	rs4422272	C	T	0.12	0.34	0.41	0.31	0	0	E032,7_Enh;E034,12_EnhBiv;E035,7_Enh;E036,7_Enh;E050,7_Enh;E051,7_Enh	E031,17_EnhW2;E032,19_DNase;E033,17_EnhW2;E035,17_EnhW2;E036,16_EnhW1;E042,17_EnhW2;E043,19_DNase;E045,17_EnhW2;E046,17_EnhW2;E047,17_EnhW2;E050,14_EnhA2;E051,14_EnhA2;E062,19_DNase;E115,19_DNase;E116,17_EnhW2;E123,19_DNase;E124,19_DNase	E003,H3K27ac_Enh;E050,H3K27ac_Enh;E007,H3K9ac_Pro;E021,H3K4me1_Enh;E022,H3K4me1_Enh;E032,H3K4me1_Enh;E034,H3K4me1_Enh;E036,H3K4me1_Enh;E046,H3K4me1_Enh;E047,H3K4me1_Enh;E050,H3K4me1_Enh;E051,H3K4me1_Enh;E093,H3K4me1_Enh;E098,H3K4me1_Enh;E113,H3K4me1_Enh;E050,H3K4me3_Pro	E050;E051	.	Evi-1_2	ENSG00000178075.14	0	0	GRAMD1C	118992	gene
17	65773441	rs9901885	T	C	0.7	0.5	0.78	0.37	0	0	E033,7_Enh;E077,7_Enh	E065,19_DNase;E077,19_DNase;E085,19_DNase;E100,19_DNase;E101,19_DNase;E102,19_DNase;E106,19_DNase;E110,17_EnhW2	E001,H3K4me1_Enh;E009,H3K4me1_Enh;E010,H3K4me1_Enh;E011,H3K4me1_Enh;E012,H3K4me1_Enh;E013,H3K4me1_Enh;E015,H3K4me1_Enh;E018,H3K4me1_Enh;E033,H3K4me1_Enh;E061,H3K4me1_Enh;E077,H3K4me1_Enh;E083,H3K4me1_Enh;E084,H3K4me1_Enh;E085,H3K4me1_Enh;E087,H3K4me1_Enh;E092,H3K4me1_Enh;E093,H3K4me1_Enh;E099,H3K4me1_Enh;E101,H3K4me1_Enh;E104,H3K4me1_Enh;E107,H3K4me1_Enh;E109,H3K4me1_Enh;E110,H3K4me1_Enh;E114,H3K…		.	Pou2f2_known3	ENSG00000154240.12	0	0	CEP112	556546	gene
2	239552404	rs1872622	C	T	0.99	0.97	1	0.95	0	0	E034,12_EnhBiv;E093,7_Enh;E112,7_Enh;E115,2_TssAFlnk	E036,15_EnhAF;E093,10_TxEnh5;E112,12_TxEnhW;E115,13_EnhA1;E116,18_EnhAc;E123,15_EnhAF	E012,H3K4me1_Enh;E034,H3K4me1_Enh;E041,H3K4me1_Enh;E042,H3K4me1_Enh;E043,H3K4me1_Enh;E057,H3K4me1_Enh;E091,H3K4me1_Enh;E093,H3K4me1_Enh;E112,H3K4me1_Enh;E115,H3K4me1_Enh;E022,H3K4me3_Pro;E115,H3K4me3_Pro;E093,H3K27ac_Enh;E115,H3K27ac_Enh;E115,H3K9ac_Pro		.	CTCF_disc9;ELF1_disc3;Rad21_disc6;Zfx	ENSG00000196758.2	5	25896	AC079612.1	0	sequencing in progress
8	102084750	rs12155739	C	T	0	0.01	0	0.02	0	0	E034,7_Enh;E046,7_Enh;E077,7_Enh;E095,7_Enh;E096,7_Enh;E097,7_Enh;E102,7_Enh;E105,7_Enh;E106,7_Enh;E109,7_Enh;E111,7_Enh;E113,7_Enh	E065,17_EnhW2;E075,17_EnhW2;E077,22_PromP;E096,17_EnhW2;E100,17_EnhW2;E101,17_EnhW2;E102,17_EnhW2;E103,17_EnhW2;E104,17_EnhW2;E106,17_EnhW2;E109,17_EnhW2	E018,H3K4me1_Enh;E034,H3K4me1_Enh;E042,H3K4me1_Enh;E046,H3K4me1_Enh;E065,H3K4me1_Enh;E077,H3K4me1_Enh;E085,H3K4me1_Enh;E087,H3K4me1_Enh;E091,H3K4me1_Enh;E094,H3K4me1_Enh;E095,H3K4me1_Enh;E096,H3K4me1_Enh;E097,H3K4me1_Enh;E100,H3K4me1_Enh;E101,H3K4me1_Enh;E102,H3K4me1_Enh;E103,H3K4me1_Enh;E105,H3K4me1_Enh;E106,H3K4me1_Enh;E109,H3K4me1_Enh;E111,H3K4me1_Enh;E113,H3K4me1_Enh;E075,H3K27ac_Enh;E102,H3K…	E005;E082;E086;E091;E109	.	Ets_disc5	ENSG00000104490.12	0	0	NCALD	438364	gene
4	86578084	rs12499206	T	A	0.0041	0.0028	0.01	0.01	0	0	E042,7_Enh		E006,H3K9ac_Pro;E009,H3K4me1_Enh;E042,H3K4me1_Enh;E058,H3K4me1_Enh;E061,H3K4me1_Enh;E071,H3K4me1_Enh;E087,H3K4me1_Enh;E011,H3K27ac_Enh;E012,H3K27ac_Enh;E058,H3K27ac_Enh		.	HNF1_2;HNF1_4;Hmbox1;Hoxa4;Isl2;Lhx3_2;Pou3f4	ENSG00000109339.14	0	0	MAPK10	579008	gene
10	83679553	rs17317447	G	A	0.14	0.57	0.4	0.58	0	0	E042,7_Enh;E116,2_TssAFlnk		E004,H3K9ac_Pro;E062,H3K9ac_Pro;E011,H3K4me1_Enh;E034,H3K4me1_Enh;E037,H3K4me1_Enh;E040,H3K4me1_Enh;E042,H3K4me1_Enh;E043,H3K4me1_Enh;E044,H3K4me1_Enh;E080,H3K4me1_Enh;E099,H3K4me1_Enh;E116,H3K4me1_Enh;E037,H3K4me3_Pro;E040,H3K4me3_Pro;E042,H3K4me3_Pro;E116,H3K4me3_Pro;E048,H3K27ac_Enh;E116,H3K27ac_Enh	E116	.	AIRE_2;Barhl1;Barx2;En-1_3;Esx1;Gbx2;Hlx1;Hoxb4;Ik-3;Isl2;Lhx4;Msx-1_2;Msx2;Nobox_2;Pax-6_3;Pax7;Phox2a;Pou2f2_known4;Pou3f2_4;Pou3f4;Pou6f1_2;Prrx1;Vax2	ENSG00000233945.1	5	4113	RP11-344L13.2	3033	no protein, long intergenic non-preotein coding RNA
4	165698149	rs2125698	T	C	0.03	0.14	0.12	0.13	0	0	E049,7_Enh		E015,H3K4me1_Enh;E049,H3K4me1_Enh		.	AP-1_disc6;AP-1_disc8;GATA_disc3;HDAC2_disc6;PRDM1_known1;PU.1_known2;SPIB;p300_disc10	ENSG00000249500.1	0	0	RP11-340B18.1	78139	no protein, long intergenic non-preotein coding RNA
10	29601338	rs2505900	C	A	0.23	0.37	0.21	0.52	0	0	E049,7_Enh;E055,7_Enh;E076,7_Enh;E083,7_Enh;E097,7_Enh;E100,7_Enh;E103,7_Enh;E107,7_Enh;E108,7_Enh;E127,7_Enh	E056,17_EnhW2;E063,17_EnhW2;E065,18_EnhAc;E103,17_EnhW2;E107,18_EnhAc;E108,17_EnhW2;E111,17_EnhW2	E001,H3K4me1_Enh;E013,H3K4me1_Enh;E014,H3K4me1_Enh;E016,H3K4me1_Enh;E018,H3K4me1_Enh;E025,H3K4me1_Enh;E026,H3K4me1_Enh;E027,H3K4me1_Enh;E028,H3K4me1_Enh;E041,H3K4me1_Enh;E049,H3K4me1_Enh;E050,H3K4me1_Enh;E051,H3K4me1_Enh;E055,H3K4me1_Enh;E056,H3K4me1_Enh;E057,H3K4me1_Enh;E058,H3K4me1_Enh;E065,H3K4me1_Enh;E070,H3K4me1_Enh;E076,H3K4me1_Enh;E078,H3K4me1_Enh;E083,H3K4me1_Enh;E088,H3K4me1_Enh;E090,H3K…		.	.	ENSG00000197321.9	0	0	SVIL	279443	gene
6	33089574	rs9501263	G	A	0.08	0.07	0.07	0.04	0	0	E050,7_Enh	E055,19_DNase	E013,H3K4me1_Enh;E028,H3K4me1_Enh;E032,H3K4me1_Enh;E050,H3K4me1_Enh;E032,H3K27ac_Enh;E038,H3K27ac_Enh;E074,H3K27ac_Enh;E096,H3K27ac_Enh;E062,H3K9ac_Pro;E063,H3K9ac_Pro;E101,H3K9ac_Pro	E032	.	GR_known10;Irf_known7;Irf_known9;SIX5_disc3	ENSG00000223865.5	3	2372	HLA-DPB1	11275	gene
6	12762582	rs13217579	T	G	0.52	0.33	0.02	0.34	0	0	E052,7_Enh;E055,7_Enh;E056,7_Enh;E058,7_Enh;E120,7_Enh;E121,7_Enh;E125,7_Enh;E126,7_Enh	E013,19_DNase;E017,18_EnhAc;E023,19_DNase;E025,19_DNase;E026,19_DNase;E028,19_DNase;E049,19_DNase;E052,18_EnhAc;E055,15_EnhAF;E056,14_EnhA2;E057,19_DNase;E058,15_EnhAF;E059,19_DNase;E061,19_DNase;E082,19_DNase;E097,19_DNase;E099,19_DNase;E100,19_DNase;E105,19_DNase;E117,19_DNase;E118,19_DNase;E120,13_EnhA1;E121,13_EnhA1;E122,19_DNase;E125,15_EnhAF;E126,18_EnhAc;E127,18_EnhAc;E128,19_DNase;E129,19…	E001,H3K4me1_Enh;E023,H3K4me1_Enh;E025,H3K4me1_Enh;E052,H3K4me1_Enh;E055,H3K4me1_Enh;E056,H3K4me1_Enh;E058,H3K4me1_Enh;E068,H3K4me1_Enh;E070,H3K4me1_Enh;E120,H3K4me1_Enh;E121,H3K4me1_Enh;E125,H3K4me1_Enh;E126,H3K4me1_Enh;E127,H3K4me1_Enh;E052,H3K9ac_Pro;E120,H3K9ac_Pro;E121,H3K9ac_Pro;E125,H3K9ac_Pro;E055,H3K27ac_Enh;E056,H3K27ac_Enh;E058,H3K27ac_Enh;E091,H3K27ac_Enh;E120,H3K27ac_Enh;E121,H3K27ac…		.	Pou1f1_2;TATA_known1	ENSG00000112137.11	0	0	PHACTR1	573679	gene
2	56688358	rs918332	G	A	0.99	0.93	0.94	0.87	1	1	E052,7_Enh;E057,7_Enh;E058,7_Enh;E127,7_Enh		E026,H3K4me1_Enh;E028,H3K4me1_Enh;E052,H3K4me1_Enh;E057,H3K4me1_Enh;E058,H3K4me1_Enh;E120,H3K4me1_Enh;E122,H3K4me1_Enh;E127,H3K4me1_Enh;E058,H3K27ac_Enh;E120,H3K27ac_Enh		.	ATF2;CEBPB_known1;Foxa_disc1;Foxa_known2;Foxa_known3;Foxc1_1;Foxd1_1;Foxd1_2;Foxf1;Foxi1;Foxj2_1;Foxk1;Foxo_1;Foxo_2;Foxo_3;Foxo_4;Foxq1;HDAC2_disc2;Lhx4;Lhx8;Pax7;Pou6f1_2;Prrx2_1;TCF12_disc2;TEF;p300_disc3	ENSG00000055813.4	3	302184	CCDC85A	202050	gene
9	8254635	rs7872805	C	A	0.57	0.5	0.79	0.44	0	0	E052,7_Enh;E129,7_Enh	E017,19_DNase;E023,19_DNase;E025,19_DNase;E026,19_DNase;E049,19_DNase;E052,19_DNase;E053,19_DNase;E054,19_DNase;E055,19_DNase;E056,19_DNase;E057,19_DNase;E059,19_DNase;E061,19_DNase;E067,19_DNase;E069,19_DNase;E070,19_DNase;E071,19_DNase;E073,19_DNase;E082,19_DNase;E099,19_DNase;E122,19_DNase;E125,19_DNase;E128,19_DNase;E129,17_EnhW2	E011,H3K4me1_Enh;E025,H3K4me1_Enh;E026,H3K4me1_Enh;E052,H3K4me1_Enh;E055,H3K4me1_Enh;E097,H3K4me1_Enh;E129,H3K4me1_Enh;E011,H3K4me3_Pro;E052,H3K4me3_Pro	E055;E081;E082;E128	.	Pou2f2_known5;Pou2f2_known8;Pou5f1_disc2	ENSG00000153707.10	3	59610	PTPRD	2298477	gene
9	8254653	rs7872809	C	T	0.45	0.44	0.79	0.41	0	0	E052,7_Enh;E129,7_Enh	E017,19_DNase;E023,19_DNase;E025,19_DNase;E026,19_DNase;E049,19_DNase;E052,19_DNase;E053,19_DNase;E054,19_DNase;E055,19_DNase;E056,19_DNase;E057,19_DNase;E059,19_DNase;E061,19_DNase;E067,19_DNase;E069,19_DNase;E070,19_DNase;E071,19_DNase;E073,19_DNase;E082,19_DNase;E099,19_DNase;E122,19_DNase;E125,19_DNase;E128,19_DNase;E129,17_EnhW2	E011,H3K4me1_Enh;E025,H3K4me1_Enh;E026,H3K4me1_Enh;E052,H3K4me1_Enh;E055,H3K4me1_Enh;E097,H3K4me1_Enh;E129,H3K4me1_Enh;E011,H3K4me3_Pro;E052,H3K4me3_Pro	E055;E081;E082;E128	.	BAF155_disc2;Cdx;SIX5_disc1;STAT_known1;STAT_known11;Znf143_disc2	ENSG00000153707.10	3	59592	PTPRD	2298477	gene
6	57512264	rs12208485	G	A					0	0	E053,7_Enh		E018,H3K4me1_Enh;E053,H3K4me1_Enh;E100,H3K4me1_Enh;E055,H3K27ac_Enh;E067,H3K4me3_Pro;E083,H3K4me3_Pro	E004	.	HDAC2_disc6;Smad_1	ENSG00000146143.12	0	0	PRIM2	332044	gene
20	43045029	rs2425563	G	A	0.71	0.34	0.24	0.18	1	1	E053,7_Enh;E054,7_Enh;E081,7_Enh		E053,H3K4me1_Enh;E054,H3K4me1_Enh;E071,H3K4me1_Enh;E081,H3K4me1_Enh	E081	.	EWSR1-FLI1;Ets_known1;GATA_disc3;STAT_disc6;Smad_2	ENSG00000196090.7	0	0	PTPRT	1117218	gene
20	43044695	rs2425562	T	C	0.78	0.46	0.24	0.28	0	0	E053,7_Enh;E054,7_Enh;E081,7_Enh;E082,7_Enh		E053,H3K4me1_Enh;E054,H3K4me1_Enh;E071,H3K4me1_Enh;E081,H3K4me1_Enh		.	AFP1;OTX;Obox3;Otx2;Pitx3	ENSG00000196090.7	0	0	PTPRT	1117218	gene
3	132431339	rs3860499	A	G	0.89	0.54	0.43	0.39	0	0	E055,7_Enh;E061,7_Enh	E061,12_TxEnhW	E006,H3K27ac_Enh;E011,H3K27ac_Enh;E013,H3K27ac_Enh;E015,H3K27ac_Enh;E026,H3K27ac_Enh;E049,H3K27ac_Enh;E050,H3K27ac_Enh;E055,H3K27ac_Enh;E058,H3K27ac_Enh;E059,H3K27ac_Enh;E061,H3K27ac_Enh;E124,H3K27ac_Enh;E125,H3K27ac_Enh;E127,H3K27ac_Enh;E128,H3K27ac_Enh;E023,H3K4me1_Enh;E025,H3K4me1_Enh;E026,H3K4me1_Enh;E029,H3K4me1_Enh;E036,H3K4me1_Enh;E037,H3K4me1_Enh;E038,H3K4me1_Enh;E039,H3K4me1_Enh;E040,H3K…		.	.	ENSG00000138246.11	0	0	DNAJC13	121506	gene
6	12790975	rs1412753	G	C	0.52	0.31	0.02	0.34	0	0	E055,7_Enh;E120,7_Enh;E121,7_Enh		E001,H3K4me1_Enh;E008,H3K4me1_Enh;E012,H3K4me1_Enh;E014,H3K4me1_Enh;E020,H3K4me1_Enh;E055,H3K4me1_Enh;E056,H3K4me1_Enh;E070,H3K4me1_Enh;E120,H3K4me1_Enh;E121,H3K4me1_Enh;E067,H3K27ac_Enh;E072,H3K27ac_Enh;E073,H3K27ac_Enh;E076,H3K9ac_Pro		.	Sox_17	ENSG00000112137.11	0	0	PHACTR1	573679	gene
6	12801256	rs6917493	C	G	0.5	0.3	0.02	0.33	0	0	E059,7_Enh;E061,7_Enh;E068,7_Enh	E005,19_DNase;E006,19_DNase;E013,19_DNase;E017,19_DNase;E023,19_DNase;E025,19_DNase;E026,19_DNase;E027,19_DNase;E028,19_DNase;E049,19_DNase;E052,19_DNase;E055,19_DNase;E056,19_DNase;E057,19_DNase;E058,19_DNase;E059,17_EnhW2;E061,19_DNase;E062,19_DNase;E068,19_DNase;E078,19_DNase;E081,19_DNase;E082,19_DNase;E083,19_DNase;E091,19_DNase;E099,19_DNase;E105,19_DNase;E114,19_DNase;E117,19_DNase;E118,19…	E014,H3K4me1_Enh;E023,H3K4me1_Enh;E055,H3K4me1_Enh;E059,H3K4me1_Enh;E061,H3K4me1_Enh;E068,H3K4me1_Enh;E081,H3K4me1_Enh;E091,H3K4me1_Enh;E059,H3K27ac_Enh;E061,H3K27ac_Enh;E067,H3K27ac_Enh;E068,H3K27ac_Enh;E091,H3K27ac_Enh	E055;E056;E059;E091;E119;E128	MCF10A-Er-Src,STAT3,Harvard(Weissman),EtOH_0.01pct_4hr;MCF10A-Er-Src,STAT3,Harvard(Weissman),TAM_1uM_36hr;MCF10A-Er-Src,STAT3,Stanford,EtOH_0.01pct_12hr;T-47D,FOXA1,HudsonAlpha,DMSO_0.02pct	GR_known10;GR_known3	ENSG00000112137.11	0	0	PHACTR1	573679	gene
6	12801362	rs6916334	G	T	0.53	0.32	0.02	0.34	0	0	E059,7_Enh;E061,7_Enh;E068,7_Enh	E005,19_DNase;E006,19_DNase;E013,19_DNase;E017,19_DNase;E023,19_DNase;E025,19_DNase;E026,19_DNase;E027,19_DNase;E028,19_DNase;E049,19_DNase;E052,19_DNase;E055,19_DNase;E056,19_DNase;E057,19_DNase;E058,19_DNase;E059,17_EnhW2;E061,19_DNase;E062,19_DNase;E068,19_DNase;E078,19_DNase;E081,19_DNase;E082,19_DNase;E083,19_DNase;E091,19_DNase;E099,19_DNase;E105,19_DNase;E114,19_DNase;E117,19_DNase;E118,19…	E014,H3K4me1_Enh;E023,H3K4me1_Enh;E055,H3K4me1_Enh;E059,H3K4me1_Enh;E061,H3K4me1_Enh;E068,H3K4me1_Enh;E081,H3K4me1_Enh;E091,H3K4me1_Enh;E059,H3K27ac_Enh;E061,H3K27ac_Enh;E067,H3K27ac_Enh;E068,H3K27ac_Enh;E091,H3K27ac_Enh	E005;E055;E056;E059;E091;E119;E120;E125;E126;E128	MCF10A-Er-Src,STAT3,Harvard(Weissman),EtOH_0.01pct_4hr;MCF10A-Er-Src,STAT3,Harvard(Weissman),TAM_1uM_36hr;MCF10A-Er-Src,STAT3,Stanford,EtOH_0.01pct_12hr;T-47D,FOXA1,HudsonAlpha,DMSO_0.02pct	CEBPA_1;HNF4_disc4;LBP-1_1;Pax-8_1	ENSG00000112137.11	0	0	PHACTR1	573679	gene
3	132430820	rs6439357	T	G	0.89	0.53	0.43	0.39	0	0	E061,7_Enh	E061,10_TxEnh5;E124,12_TxEnhW	E006,H3K27ac_Enh;E011,H3K27ac_Enh;E013,H3K27ac_Enh;E015,H3K27ac_Enh;E026,H3K27ac_Enh;E050,H3K27ac_Enh;E055,H3K27ac_Enh;E058,H3K27ac_Enh;E059,H3K27ac_Enh;E061,H3K27ac_Enh;E124,H3K27ac_Enh;E128,H3K27ac_Enh;E023,H3K4me1_Enh;E029,H3K4me1_Enh;E037,H3K4me1_Enh;E039,H3K4me1_Enh;E040,H3K4me1_Enh;E041,H3K4me1_Enh;E052,H3K4me1_Enh;E055,H3K4me1_Enh;E056,H3K4me1_Enh;E059,H3K4me1_Enh;E061,H3K4me1_Enh;E065,H3K…		.	Maf_known3	ENSG00000138246.11	0	0	DNAJC13	121506	gene
6	60375662	rs17658313	C	A					0	0	E061,7_Enh		E017,H3K27ac_Enh;E018,H3K4me1_Enh;E103,H3K4me1_Enh;E129,H3K4me1_Enh	E050;E051	.	.	ENSG00000146143.12	0	0	PRIM2	332044	gene
12	24419051	rs16927597	T	C	0.36	0.28	0.65	0.19	0	0	E061,7_Enh		E020,H3K27ac_Enh;E059,H3K27ac_Enh;E065,H3K27ac_Enh;E032,H3K4me1_Enh;E061,H3K4me1_Enh;E065,H3K4me1_Enh;E083,H3K4me1_Enh;E097,H3K4me1_Enh		.	CEBPG;Foxp1;HDAC2_disc6;Pou1f1_2;RXRA_disc4	ENSG00000255864.1	0	0	RP11-444D3.1	349334	no protein, long intergenic non-preotein coding RNA
1	201928542	rs9787358	G	A	0.25	0.34	0.73	0.25	0	0	E065,6_EnhG;E076,6_EnhG;E091,7_Enh;E108,6_EnhG;E111,6_EnhG;E123,7_Enh	E065,17_EnhW2;E076,10_TxEnh5;E103,17_EnhW2;E111,15_EnhAF	E008,H3K27ac_Enh;E056,H3K27ac_Enh;E065,H3K27ac_Enh;E075,H3K27ac_Enh;E076,H3K27ac_Enh;E079,H3K27ac_Enh;E091,H3K27ac_Enh;E097,H3K27ac_Enh;E101,H3K27ac_Enh;E102,H3K27ac_Enh;E103,H3K27ac_Enh;E105,H3K27ac_Enh;E106,H3K27ac_Enh;E108,H3K27ac_Enh;E109,H3K27ac_Enh;E111,H3K27ac_Enh;E023,H3K9ac_Pro;E076,H3K9ac_Pro;E107,H3K9ac_Pro;E108,H3K9ac_Pro;E027,H3K4me1_Enh;E065,H3K4me1_Enh;E076,H3K4me1_Enh;E078,H3K4me1…	E091	.	Myf_1	ENSG00000163431.11	0	0	LMOD1	50136	gene
11	88113589	rs9144	C	T	0.87	0.66	0.67	0.62	0	0	E065,7_Enh;E092,7_Enh		E007,H3K9ac_Pro;E058,H3K27ac_Enh;E061,H3K27ac_Enh;E080,H3K27ac_Enh;E106,H3K27ac_Enh;E109,H3K27ac_Enh;E059,H3K4me1_Enh;E061,H3K4me1_Enh;E065,H3K4me1_Enh;E080,H3K4me1_Enh;E086,H3K4me1_Enh;E088,H3K4me1_Enh;E092,H3K4me1_Enh;E096,H3K4me1_Enh		.	Hand1_1	ENSG00000255241.1	0	0	RP11-164N3.3	17244	no protein, long intergenic non-preotein coding RNA
5	161851332	rs6883877	C	T	0.21	0.02	0.11	0.02	0	0	E067,1_TssA;E072,1_TssA	E020,17_EnhW2	E001,H3K4me1_Enh;E003,H3K4me1_Enh;E014,H3K4me1_Enh;E015,H3K4me1_Enh;E016,H3K4me1_Enh;E018,H3K4me1_Enh;E019,H3K4me1_Enh;E020,H3K4me1_Enh;E014,H3K27ac_Enh;E020,H3K27ac_Enh;E067,H3K27ac_Enh;E072,H3K27ac_Enh;E073,H3K27ac_Enh;E014,H3K4me3_Pro;E020,H3K4me3_Pro;E067,H3K4me3_Pro;E069,H3K4me3_Pro;E071,H3K4me3_Pro;E072,H3K4me3_Pro;E073,H3K4me3_Pro;E014,H3K9ac_Pro;E019,H3K9ac_Pro;E067,H3K9ac_Pro;E068,H3K9ac…		.	Gfi1_2;Gfi1b;Hdx;Myc_disc6;Pou2f2_known8	ENSG00000022355.10	0	0	GABRA1	52918	gene
16	77421424	rs919376	T	C	0.45	0.55	0.22	0.71	1	0	E067,7_Enh;E069,7_Enh;E072,7_Enh;E074,7_Enh	E005,19_DNase;E067,17_EnhW2;E069,16_EnhW1;E072,17_EnhW2;E074,17_EnhW2	E005,H3K27ac_Enh;E011,H3K27ac_Enh;E067,H3K27ac_Enh;E069,H3K27ac_Enh;E072,H3K27ac_Enh;E074,H3K27ac_Enh;E005,H3K4me1_Enh;E007,H3K4me1_Enh;E012,H3K4me1_Enh;E013,H3K4me1_Enh;E027,H3K4me1_Enh;E063,H3K4me1_Enh;E067,H3K4me1_Enh;E069,H3K4me1_Enh;E071,H3K4me1_Enh;E072,H3K4me1_Enh;E074,H3K4me1_Enh;E067,H3K4me3_Pro;E074,H3K4me3_Pro	E006	.	ERalpha-a_known3	ENSG00000140873.11	0	0	ADAMTS18	159987	gene
16	77421632	rs919374	A	G	0.45	0.55	0.22	0.71	0	0	E067,7_Enh;E069,7_Enh;E072,7_Enh;E074,7_Enh	E067,17_EnhW2;E069,17_EnhW2;E072,17_EnhW2;E074,17_EnhW2	E005,H3K27ac_Enh;E067,H3K27ac_Enh;E069,H3K27ac_Enh;E072,H3K27ac_Enh;E074,H3K27ac_Enh;E005,H3K4me1_Enh;E007,H3K4me1_Enh;E012,H3K4me1_Enh;E013,H3K4me1_Enh;E027,H3K4me1_Enh;E063,H3K4me1_Enh;E067,H3K4me1_Enh;E069,H3K4me1_Enh;E071,H3K4me1_Enh;E072,H3K4me1_Enh;E074,H3K4me1_Enh;E047,H3K9ac_Pro		.	CEBPB_disc1;Hsf_disc1;Pou2f2_known6	ENSG00000140873.11	0	0	ADAMTS18	159987	gene
2	159231024	rs3821301	T	G	0.64	0.87	0.67	0.88	0	0	E068,6_EnhG;E069,6_EnhG;E072,7_Enh;E090,6_EnhG	E067,11_TxEnh3;E068,11_TxEnh3;E069,11_TxEnh3;E071,11_TxEnh3;E072,11_TxEnh3;E073,11_TxEnh3;E074,11_TxEnh3	E013,H3K27ac_Enh;E055,H3K27ac_Enh;E056,H3K27ac_Enh;E061,H3K27ac_Enh;E067,H3K27ac_Enh;E068,H3K27ac_Enh;E069,H3K27ac_Enh;E071,H3K27ac_Enh;E072,H3K27ac_Enh;E073,H3K27ac_Enh;E074,H3K27ac_Enh;E089,H3K27ac_Enh;E090,H3K27ac_Enh;E096,H3K27ac_Enh;E115,H3K27ac_Enh;E056,H3K4me1_Enh;E059,H3K4me1_Enh;E061,H3K4me1_Enh;E067,H3K4me1_Enh;E068,H3K4me1_Enh;E069,H3K4me1_Enh;E071,H3K4me1_Enh;E072,H3K4me1_Enh;E073,H3K…		.	Dobox4;NF-kappaB_known2;SRF_known5;STAT_known1;STAT_known2	ENSG00000115183.9	0	0	TANC1	264025	gene
16	83439508	rs11861812	C	T	0.11	0.08	0.03	0.09	0	0	E070,7_Enh		E070,H3K4me1_Enh;E097,H3K4me1_Enh;E100,H3K4me1_Enh;E104,H3K4me1_Enh;E105,H3K4me1_Enh;E120,H3K4me1_Enh;E121,H3K4me1_Enh;E120,H3K27ac_Enh		.	DMRT7	ENSG00000140945.11	0	0	CDH13	1173837	gene
9	117360523	rs7029526	G	A	0.36	0.29	0.06	0.36	0	0	E071,7_Enh;E108,7_Enh;E121,7_Enh	E071,22_PromP;E074,17_EnhW2	E068,H3K4me1_Enh;E071,H3K4me1_Enh;E074,H3K4me1_Enh;E075,H3K4me1_Enh;E094,H3K4me1_Enh;E100,H3K4me1_Enh;E108,H3K4me1_Enh;E121,H3K4me1_Enh;E108,H3K27ac_Enh;E108,H3K4me3_Pro;E108,H3K9ac_Pro;E121,H3K9ac_Pro		.	.	ENSG00000148219.12	0	0	ASTN2	996814	gene
6	168848091	rs9455487	G	A	0.11	0.35	0.13	0.5	0	0	E074,7_Enh		E046,H3K4me1_Enh;E067,H3K4me1_Enh;E069,H3K4me1_Enh;E071,H3K4me1_Enh;E074,H3K4me1_Enh;E078,H3K4me1_Enh;E092,H3K4me1_Enh;E097,H3K4me1_Enh;E097,H3K27ac_Enh		.	Dbx1;GR_disc4;Irf_known7;Mef2_known3;Mrg1::Hoxa9_1;Myb_2;Ncx_2;YY1_disc2;YY1_known2;YY1_known3	ENSG00000225879.1	3	114518	RP3-495K2.3	1731	no protein, long intergenic non-preotein coding RNA
16	77420582	rs12925727	T	A	0.45	0.54	0.21	0.72	0	0	E074,7_Enh	E069,17_EnhW2;E072,17_EnhW2;E074,17_EnhW2	E005,H3K27ac_Enh;E011,H3K27ac_Enh;E067,H3K27ac_Enh;E069,H3K27ac_Enh;E072,H3K27ac_Enh;E074,H3K27ac_Enh;E005,H3K4me1_Enh;E010,H3K4me1_Enh;E012,H3K4me1_Enh;E013,H3K4me1_Enh;E027,H3K4me1_Enh;E063,H3K4me1_Enh;E067,H3K4me1_Enh;E069,H3K4me1_Enh;E071,H3K4me1_Enh;E072,H3K4me1_Enh;E074,H3K4me1_Enh;E088,H3K4me1_Enh;E067,H3K4me3_Pro;E074,H3K4me3_Pro;E069,H3K9ac_Pro		.	Foxd3;Foxj1_1	ENSG00000140873.11	0	0	ADAMTS18	159987	gene
9	1172430	rs1337625	G	C	0.98	0.87	0.97	0.78	0	0	E075,7_Enh		E006,H3K9ac_Pro;E012,H3K4me1_Enh;E013,H3K4me1_Enh;E015,H3K4me1_Enh;E021,H3K4me1_Enh;E039,H3K4me1_Enh;E046,H3K4me1_Enh;E055,H3K4me1_Enh;E056,H3K4me1_Enh;E075,H3K4me1_Enh;E079,H3K4me1_Enh;E093,H3K4me1_Enh;E096,H3K4me1_Enh;E098,H3K4me1_Enh;E101,H3K4me1_Enh;E106,H3K4me1_Enh;E126,H3K4me1_Enh;E046,H3K27ac_Enh;E059,H3K27ac_Enh;E098,H3K27ac_Enh;E113,H3K4me3_Pro		.	.	ENSG00000173253.10	3	114877	DMRT2	7694	gene
20	43056863	rs3092215	C	T	0.68	0.41	0.37	0.21	1	0	E076,7_Enh		E007,H3K27ac_Enh;E027,H3K4me1_Enh;E076,H3K4me1_Enh;E099,H3K4me1_Enh		.	.	ENSG00000196090.7	0	0	PTPRT	1117218	gene
3	73502352	rs7426511	A	T	0.17	0.52	0.71	0.46	0	0	E076,7_Enh;E103,7_Enh;E111,7_Enh;E120,7_Enh		E001,H3K4me1_Enh;E009,H3K4me1_Enh;E011,H3K4me1_Enh;E020,H3K4me1_Enh;E023,H3K4me1_Enh;E025,H3K4me1_Enh;E026,H3K4me1_Enh;E027,H3K4me1_Enh;E049,H3K4me1_Enh;E052,H3K4me1_Enh;E054,H3K4me1_Enh;E059,H3K4me1_Enh;E061,H3K4me1_Enh;E065,H3K4me1_Enh;E067,H3K4me1_Enh;E069,H3K4me1_Enh;E070,H3K4me1_Enh;E073,H3K4me1_Enh;E076,H3K4me1_Enh;E077,H3K4me1_Enh;E078,H3K4me1_Enh;E083,H3K4me1_Enh;E085,H3K4me1_Enh;E086,H3K…		.	Dbx1;Foxo_3;HMG-IY_2;Irf_known3;Mef2_disc1;Mef2_known2;Mef2_known3;Mef2_known4;Mef2_known6;Ncx_2	ENSG00000121440.10	0	0	PDZRN3	242507	gene
1	98457130	rs4000199	C	T	0.23	0.41	0.56	0.27	0	0	E077,7_Enh		E002,H3K4me3_Pro;E009,H3K4me1_Enh;E014,H3K4me1_Enh;E077,H3K4me1_Enh;E085,H3K4me1_Enh;E109,H3K4me1_Enh;E110,H3K4me1_Enh;E012,H3K27ac_Enh		.	Hic1_3;Pax-4_5;Znf143_known1	ENSG00000221777.1	3	83630	AL160056.1	0	sequencing in progress
1	98457359	rs11166018	A	C	0.23	0.41	0.56	0.27	1	0	E077,7_Enh		E002,H3K4me1_Enh;E009,H3K4me1_Enh;E010,H3K4me1_Enh;E014,H3K4me1_Enh;E016,H3K4me1_Enh;E077,H3K4me1_Enh;E085,H3K4me1_Enh;E109,H3K4me1_Enh;E110,H3K4me1_Enh;E115,H3K4me1_Enh;E002,H3K4me3_Pro;E012,H3K27ac_Enh;E115,H3K27ac_Enh	E109	.	.	ENSG00000221777.1	3	83859	AL160056.1	0	sequencing in progress
6	60679166	rs6459302	T	C	0.98	0.84	0.93	0.81	0	0	E080,7_Enh		E080,H3K27ac_Enh;E080,H3K4me1_Enh		.	.	ENSG00000231273.1	5	43981	RP11-343D24.2	750	no protein, long intergenic non-preotein coding RNA
18	36359267	rs17673157	C	T	0.19	0.33	0.25	0.24	1	0	E080,7_Enh;E086,7_Enh		E027,H3K4me1_Enh;E080,H3K4me1_Enh;E083,H3K4me1_Enh;E097,H3K4me1_Enh;E100,H3K4me1_Enh;E104,H3K4me1_Enh;E105,H3K4me1_Enh;E107,H3K4me1_Enh;E108,H3K4me1_Enh;E083,H3K9ac_Pro;E108,H3K9ac_Pro	E086	.	DMRT1;DMRT7;FAC1;Foxo_2;GR_known2;Nanog_disc2;Sox_13;Sox_6;TCF4_known3	ENSG00000134775.9	0	0	FHOD3	482341	gene
8	79727184	rs12155921	A	G	0	0.01	0	0.01	0	0	E080,7_Enh;E091,7_Enh;E096,7_Enh;E097,7_Enh;E106,7_Enh;E118,7_Enh;E121,7_Enh	E005,18_EnhAc	E005,H3K9ac_Pro;E018,H3K9ac_Pro;E008,H3K27ac_Enh;E011,H3K27ac_Enh;E068,H3K27ac_Enh;E091,H3K27ac_Enh;E096,H3K27ac_Enh;E097,H3K27ac_Enh;E121,H3K27ac_Enh;E014,H3K4me1_Enh;E018,H3K4me1_Enh;E077,H3K4me1_Enh;E080,H3K4me1_Enh;E088,H3K4me1_Enh;E091,H3K4me1_Enh;E092,H3K4me1_Enh;E096,H3K4me1_Enh;E097,H3K4me1_Enh;E102,H3K4me1_Enh;E117,H3K4me1_Enh;E118,H3K4me1_Enh;E121,H3K4me1_Enh	E091	.	GATA_disc3;NF-I_1	ENSG00000164683.11	3	36825	HEY1	3853	gene
6	12773758	rs950720	C	T	0.5	0.31	0.02	0.34	1	1	E081,7_Enh		E055,H3K4me1_Enh;E056,H3K4me1_Enh;E081,H3K4me1_Enh;E082,H3K4me1_Enh;E068,H3K27ac_Enh;E099,H3K4me3_Pro		.	Mef2_known1;Mef2_known4	ENSG00000112137.11	0	0	PHACTR1	573679	gene
4	57554950	rs4865243	C	T	0.05	0.41	0.46	0.46	0	0	E081,7_Enh;E092,7_Enh	E010,19_DNase;E053,19_DNase;E054,19_DNase;E067,19_DNase;E070,19_DNase;E081,18_EnhAc;E082,19_DNase	E011,H3K4me1_Enh;E081,H3K4me1_Enh;E090,H3K4me1_Enh;E092,H3K4me1_Enh;E096,H3K4me3_Pro	E081;E082;E083;E086	MCF-7,CTCF,UT-A,vehicle;SH-SY5Y,GATA2,UCD,None;SK-N-SH_RA,RAD21,HudsonAlpha,None	BCL_disc1;ELF1_disc1;Egr-1_disc2;Ehf;Elf3;En-1_2;Ets_disc2;Ets_known5;Ets_known8;Nrf1_disc2;PU.1_disc1;PU.1_known3;Pax-4_2;Pax-4_4;Pax-4_5;RXRA_disc4;TATA_disc5;TATA_disc7	ENSG00000251049.2	3	40989	RP11-685F15.1	9932	no protein, long intergenic non-preotein coding RNA
6	60703281	rs4426992	T	G	0.99	0.84	0.93	0.81	0	0	E083,1_TssA		E007,H3K9ac_Pro;E083,H3K4me3_Pro;E088,H3K4me3_Pro;E115,H3K27ac_Enh		.	HNF4_known8	ENSG00000231273.1	5	19866	RP11-343D24.2	750	no protein, long intergenic non-preotein coding RNA
16	7336522	rs6500949	T	C	0.79	0.27	0.12	0.32	0	0	E083,2_TssAFlnk;E090,7_Enh;E095,7_Enh;E100,7_Enh;E107,2_TssAFlnk;E108,2_TssAFlnk;E120,7_Enh;E121,7_Enh	E065,18_EnhAc;E083,4_PromD2;E095,17_EnhW2;E097,18_EnhAc;E100,12_TxEnhW;E105,18_EnhAc;E107,10_TxEnh5;E108,4_PromD2;E120,12_TxEnhW;E121,12_TxEnhW	E013,H3K4me1_Enh;E016,H3K4me1_Enh;E018,H3K4me1_Enh;E067,H3K4me1_Enh;E083,H3K4me1_Enh;E090,H3K4me1_Enh;E095,H3K4me1_Enh;E097,H3K4me1_Enh;E100,H3K4me1_Enh;E104,H3K4me1_Enh;E105,H3K4me1_Enh;E107,H3K4me1_Enh;E108,H3K4me1_Enh;E120,H3K4me1_Enh;E121,H3K4me1_Enh;E083,H3K4me3_Pro;E100,H3K4me3_Pro;E104,H3K4me3_Pro;E107,H3K4me3_Pro;E108,H3K4me3_Pro;E121,H3K4me3_Pro;E083,H3K9ac_Pro;E107,H3K9ac_Pro;E108,H3K9a…		HepG2,MAFF,Stanford,None;HepG2,MAFK,Stanford,None;HepG2,MAFK,Stanford,None	Foxd1_1;Hbp1;PRDM1_known1	ENSG00000078328.15	0	0	RBFOX1	1694244	gene
18	36363344	rs2077673	G	A	0.79	0.46	0.32	0.26	0	0	E083,6_EnhG		E005,H3K27ac_Enh;E083,H3K4me1_Enh;E105,H3K4me1_Enh;E108,H3K4me1_Enh;E083,H3K4me3_Pro		.	.	ENSG00000134775.9	0	0	FHOD3	482341	gene
18	36361981	rs17746090	A	G	0.42	0.35	0.25	0.25	0	0	E083,6_EnhG;E091,7_Enh;E095,7_Enh;E105,7_Enh	E005,19_DNase;E099,19_DNase	E005,H3K4me3_Pro;E109,H3K4me3_Pro;E021,H3K27ac_Enh;E091,H3K27ac_Enh;E105,H3K27ac_Enh;E027,H3K4me1_Enh;E083,H3K4me1_Enh;E091,H3K4me1_Enh;E095,H3K4me1_Enh;E104,H3K4me1_Enh;E105,H3K4me1_Enh;E108,H3K4me1_Enh;E083,H3K9ac_Pro	E091	.	CEBPB_known2;Pax-5_known3	ENSG00000134775.9	0	0	FHOD3	482341	gene
5	71844498	rs1911936	G	A	0.87	0.76	0.5	0.74	0	0	E083,7_Enh	E083,22_PromP	E081,H3K4me1_Enh;E083,H3K4me1_Enh;E083,H3K4me3_Pro		.	Nanog_disc4;Pou2f2_known8;Pou5f1_known2;TFE	ENSG00000164326.4	3	123449	CARTPT	1885	gene
5	71845216	rs7709962	A	G	0.87	0.76	0.5	0.74	0	0	E083,7_Enh		E047,H3K9ac_Pro;E081,H3K4me1_Enh;E083,H3K4me1_Enh;E083,H3K4me3_Pro		.	Irf_disc3;VDR_2;p300_disc5	ENSG00000164326.4	3	124167	CARTPT	1885	gene
18	36341099	rs2848589	A	G	0.81	0.68	0.76	0.75	0	0	E083,7_Enh		E083,H3K4me1_Enh;E084,H3K4me1_Enh;E086,H3K4me1_Enh;E097,H3K4me1_Enh;E100,H3K4me1_Enh;E101,H3K4me1_Enh;E102,H3K4me1_Enh;E104,H3K4me1_Enh;E105,H3K4me1_Enh;E083,H3K4me3_Pro;E083,H3K9ac_Pro;E095,H3K27ac_Enh	E003	.	CEBPB_known2	ENSG00000134775.9	0	0	FHOD3	482341	gene
17	65758742	rs9907969	C	A	0.49	0.47	0.79	0.37	0	0	E083,7_Enh		E013,H3K27ac_Enh;E013,H3K4me1_Enh;E083,H3K4me1_Enh;E118,H3K4me1_Enh		.	EWSR1-FLI1;Pou3f2_1;TCF4_disc2	ENSG00000154240.12	0	0	CEP112	556546	gene
18	36359003	rs17746071	T	G	0.25	0.34	0.25	0.25	0	0	E083,7_Enh;E086,7_Enh		E027,H3K4me1_Enh;E080,H3K4me1_Enh;E083,H3K4me1_Enh;E100,H3K4me1_Enh;E104,H3K4me1_Enh;E105,H3K4me1_Enh;E107,H3K4me1_Enh;E108,H3K4me1_Enh;E083,H3K9ac_Pro;E108,H3K9ac_Pro		.	.	ENSG00000134775.9	0	0	FHOD3	482341	gene
18	36325350	rs480906	A	G	0.46	0.64	0.71	0.74	0	0	E083,7_Enh;E095,7_Enh		E007,H3K4me1_Enh;E012,H3K4me1_Enh;E019,H3K4me1_Enh;E020,H3K4me1_Enh;E024,H3K4me1_Enh;E027,H3K4me1_Enh;E049,H3K4me1_Enh;E053,H3K4me1_Enh;E054,H3K4me1_Enh;E075,H3K4me1_Enh;E083,H3K4me1_Enh;E095,H3K4me1_Enh;E104,H3K4me1_Enh;E105,H3K4me1_Enh;E012,H3K27ac_Enh;E095,H3K27ac_Enh;E083,H3K4me3_Pro;E121,H3K4me3_Pro;E083,H3K9ac_Pro;E108,H3K9ac_Pro		.	Barx1	ENSG00000134775.9	0	0	FHOD3	482341	gene
3	25409970	rs2364118	G	A	0.91	0.86	1	0.8	0	0	E084,7_Enh		E011,H3K27ac_Enh;E013,H3K27ac_Enh;E084,H3K27ac_Enh;E085,H3K27ac_Enh;E011,H3K4me1_Enh;E077,H3K4me1_Enh;E084,H3K4me1_Enh;E085,H3K4me1_Enh;E092,H3K4me1_Enh;E110,H3K4me1_Enh;E114,H3K4me1_Enh;E011,H3K4me3_Pro;E106,H3K4me3_Pro		.	.	ENSG00000077092.14	0	0	RARB	423600	gene
10	71927117	rs11000090	C	T	0.07	0.07	0.13	0.14	0	0	E084,7_Enh;E085,7_Enh;E114,7_Enh;E118,7_Enh	E084,17_EnhW2;E085,15_EnhAF;E118,18_EnhAc	E006,H3K4me1_Enh;E017,H3K4me1_Enh;E055,H3K4me1_Enh;E056,H3K4me1_Enh;E084,H3K4me1_Enh;E085,H3K4me1_Enh;E098,H3K4me1_Enh;E114,H3K4me1_Enh;E118,H3K4me1_Enh;E126,H3K4me1_Enh;E017,H3K27ac_Enh;E056,H3K27ac_Enh;E076,H3K27ac_Enh;E084,H3K27ac_Enh;E114,H3K27ac_Enh;E118,H3K27ac_Enh;E017,H3K9ac_Pro;E118,H3K9ac_Pro;E118,H3K4me3_Pro	E118	.	Foxa_known2;Foxj2_1	ENSG00000122863.5	5	37247	CHST3	49199	gene
6	25663957	rs9467556	T	C	0.22	0.11	0.14	0.15	0	0	E087,7_Enh		E002,H3K4me3_Pro;E110,H3K4me3_Pro;E047,H3K9ac_Pro;E082,H3K4me1_Enh;E087,H3K4me1_Enh;E087,H3K27ac_Enh		.	.	ENSG00000079689.9	0	0	SCGN	49582	gene
1	26344593	rs12562454	G	T	0.15	0.2	0.18	0.17	0	0	E091,6_EnhG		E005,H3K9ac_Pro;E007,H3K9ac_Pro;E062,H3K9ac_Pro;E063,H3K9ac_Pro;E124,H3K9ac_Pro;E006,H3K4me1_Enh;E022,H3K4me1_Enh;E079,H3K4me1_Enh;E089,H3K4me1_Enh;E091,H3K4me1_Enh;E113,H3K4me1_Enh;E011,H3K27ac_Enh;E022,H3K27ac_Enh;E055,H3K27ac_Enh;E056,H3K27ac_Enh;E059,H3K27ac_Enh;E091,H3K27ac_Enh;E056,H3K4me3_Pro;E079,H3K4me3_Pro;E094,H3K4me3_Pro;E113,H3K4me3_Pro		.	.	ENSG00000176092.8	0	0	AIM1L	32271	gene
16	24302332	rs12599474	A	G	0.52	0.34	0.13	0.34	1	1	E091,7_Enh		E091,H3K4me1_Enh;E117,H3K4me1_Enh		.	Mef2_disc3;Pax-5_disc2	ENSG00000006116.3	0	0	CACNG3	107248	gene
6	12800592	rs12523719	T	G	0.53	0.32	0.02	0.34	0	0	E091,7_Enh		E059,H3K27ac_Enh;E061,H3K27ac_Enh;E067,H3K27ac_Enh;E091,H3K27ac_Enh;E061,H3K4me1_Enh;E081,H3K4me1_Enh		.	CEBPB_known6	ENSG00000112137.11	0	0	PHACTR1	573679	gene
2	74085953	rs828872	T	C	0.93	0.81	0.5	0.9	0	0	E091,7_Enh;E095,7_Enh;E105,6_EnhG		E013,H3K27ac_Enh;E039,H3K27ac_Enh;E041,H3K27ac_Enh;E043,H3K27ac_Enh;E048,H3K27ac_Enh;E055,H3K27ac_Enh;E061,H3K27ac_Enh;E067,H3K27ac_Enh;E069,H3K27ac_Enh;E071,H3K27ac_Enh;E072,H3K27ac_Enh;E074,H3K27ac_Enh;E091,H3K27ac_Enh;E105,H3K27ac_Enh;E124,H3K27ac_Enh;E015,H3K9ac_Pro;E049,H3K9ac_Pro;E063,H3K9ac_Pro;E067,H3K9ac_Pro;E072,H3K9ac_Pro;E107,H3K9ac_Pro;E022,H3K4me1_Enh;E056,H3K4me1_Enh;E083,H3K4me1_E…		.	INSM1;RXRA_known6	ENSG00000187605.10	0	0	TET3	121772	gene
17	65776034	rs12939558	A	G	0.29	0.48	0.22	0.62	0	0	E091,7_Enh;E126,7_Enh		E002,H3K4me1_Enh;E005,H3K4me1_Enh;E013,H3K4me1_Enh;E015,H3K4me1_Enh;E050,H3K4me1_Enh;E055,H3K4me1_Enh;E056,H3K4me1_Enh;E061,H3K4me1_Enh;E063,H3K4me1_Enh;E083,H3K4me1_Enh;E091,H3K4me1_Enh;E095,H3K4me1_Enh;E105,H3K4me1_Enh;E112,H3K4me1_Enh;E113,H3K4me1_Enh;E125,H3K4me1_Enh;E126,H3K4me1_Enh;E003,H3K27ac_Enh;E008,H3K27ac_Enh;E013,H3K27ac_Enh;E007,H3K4me3_Pro;E036,H3K4me3_Pro	E003;E005;E056;E082;E091	H1-hESC,RAD21,HudsonAlpha,None	Foxm1	ENSG00000154240.12	0	0	CEP112	556546	gene
2	239550362	rs1684268	C	A	0.95	0.96	1	0.96	0	0	E092,7_Enh;E093,7_Enh;E112,7_Enh;E115,7_Enh;E127,7_Enh	E036,17_EnhW2;E093,13_EnhA1;E115,13_EnhA1	E006,H3K9ac_Pro;E007,H3K9ac_Pro;E063,H3K9ac_Pro;E115,H3K9ac_Pro;E012,H3K4me1_Enh;E038,H3K4me1_Enh;E044,H3K4me1_Enh;E048,H3K4me1_Enh;E057,H3K4me1_Enh;E058,H3K4me1_Enh;E063,H3K4me1_Enh;E078,H3K4me1_Enh;E079,H3K4me1_Enh;E090,H3K4me1_Enh;E091,H3K4me1_Enh;E092,H3K4me1_Enh;E093,H3K4me1_Enh;E098,H3K4me1_Enh;E112,H3K4me1_Enh;E115,H3K4me1_Enh;E127,H3K4me1_Enh;E093,H3K27ac_Enh;E112,H3K27ac_Enh;E115,H3K27ac…		.	Myc_disc7	ENSG00000196758.2	5	27938	AC079612.1	0	sequencing in progress
2	239554432	rs1386001	T	C	0.12	0.04	0	0.05	0	0	E093,7_Enh;E112,7_Enh;E115,7_Enh	E036,15_EnhAF;E093,15_EnhAF;E115,13_EnhA1;E116,18_EnhAc	E008,H3K27ac_Enh;E093,H3K27ac_Enh;E115,H3K27ac_Enh;E018,H3K9ac_Pro;E115,H3K9ac_Pro;E040,H3K4me1_Enh;E042,H3K4me1_Enh;E043,H3K4me1_Enh;E044,H3K4me1_Enh;E048,H3K4me1_Enh;E058,H3K4me1_Enh;E061,H3K4me1_Enh;E089,H3K4me1_Enh;E093,H3K4me1_Enh;E098,H3K4me1_Enh;E112,H3K4me1_Enh;E115,H3K4me1_Enh;E115,H3K4me3_Pro		.	.	ENSG00000196758.2	5	23868	AC079612.1	0	sequencing in progress
6	148619464	rs6928140	A	G	0.36	0.15	0.1	0.27	0	0	E093,7_Enh;E116,7_Enh		E050,H3K4me1_Enh;E061,H3K4me1_Enh;E092,H3K4me1_Enh;E093,H3K4me1_Enh;E096,H3K4me1_Enh;E116,H3K4me1_Enh		.	HNF4_disc4	ENSG00000111961.12	3	67413	SASH1	279746	gene
15	79573568	rs1765257	A	T	0.37	0.2	0.2	0.18	0	0	E094,7_Enh;E098,7_Enh;E110,7_Enh		E012,H3K4me1_Enh;E056,H3K4me1_Enh;E075,H3K4me1_Enh;E094,H3K4me1_Enh;E098,H3K4me1_Enh;E101,H3K4me1_Enh;E102,H3K4me1_Enh;E110,H3K4me1_Enh;E075,H3K27ac_Enh;E092,H3K27ac_Enh;E101,H3K27ac_Enh;E102,H3K27ac_Enh		.	BCL_disc4;Irf_disc3;Irf_known9;Nanog_disc2;PU.1_disc2;Pax-5_disc3;RXRA_disc4;Spz1_2;TATA_disc7;p300_disc5	ENSG00000169330.4	3	101277	KIAA1024	39774	gene
15	79574331	rs1765262	A	G	0.34	0.15	0.2	0.12	0	0	E094,7_Enh;E101,7_Enh;E102,7_Enh;E110,7_Enh	E075,17_EnhW2;E101,16_EnhW1;E102,16_EnhW1;E110,22_PromP	E056,H3K4me1_Enh;E075,H3K4me1_Enh;E094,H3K4me1_Enh;E098,H3K4me1_Enh;E101,H3K4me1_Enh;E102,H3K4me1_Enh;E110,H3K4me1_Enh;E075,H3K27ac_Enh;E092,H3K27ac_Enh;E101,H3K27ac_Enh;E102,H3K27ac_Enh;E106,H3K27ac_Enh;E101,H3K4me3_Pro;E102,H3K4me3_Pro		MCF-7,CTCF,UT-A,None	BDP1_disc3;GR_disc1;GR_known5;GR_known7	ENSG00000169330.4	3	102040	KIAA1024	39774	gene
15	79573664	rs1765258	A	T	0.15	0.15	0.2	0.13	0	0	E094,7_Enh;E110,7_Enh		E012,H3K4me1_Enh;E056,H3K4me1_Enh;E075,H3K4me1_Enh;E094,H3K4me1_Enh;E098,H3K4me1_Enh;E101,H3K4me1_Enh;E102,H3K4me1_Enh;E110,H3K4me1_Enh;E075,H3K27ac_Enh;E092,H3K27ac_Enh;E101,H3K27ac_Enh;E102,H3K27ac_Enh		.	NRSF_disc1;NRSF_known1;Sin3Ak-20_disc1	ENSG00000169330.4	3	101373	KIAA1024	39774	gene
15	79573875	rs1765259	T	G	0.35	0.17	0.2	0.13	0	0	E094,7_Enh;E110,7_Enh		E012,H3K4me1_Enh;E056,H3K4me1_Enh;E075,H3K4me1_Enh;E094,H3K4me1_Enh;E098,H3K4me1_Enh;E101,H3K4me1_Enh;E102,H3K4me1_Enh;E110,H3K4me1_Enh;E075,H3K27ac_Enh;E092,H3K27ac_Enh;E101,H3K27ac_Enh;E102,H3K27ac_Enh		.	HNF4_disc2;Pax-6_2	ENSG00000169330.4	3	101584	KIAA1024	39774	gene
15	79574005	rs1765260	G	A	0.15	0.15	0.2	0.13	0	0	E094,7_Enh;E110,7_Enh		E012,H3K4me1_Enh;E056,H3K4me1_Enh;E075,H3K4me1_Enh;E094,H3K4me1_Enh;E098,H3K4me1_Enh;E101,H3K4me1_Enh;E102,H3K4me1_Enh;E110,H3K4me1_Enh;E075,H3K27ac_Enh;E092,H3K27ac_Enh;E101,H3K27ac_Enh;E102,H3K27ac_Enh;E102,H3K4me3_Pro		.	.	ENSG00000169330.4	3	101714	KIAA1024	39774	gene
15	79575437	rs1685158	A	C	0.56	0.16	0.19	0.12	0	0	E101,7_Enh;E102,7_Enh;E110,7_Enh		E075,H3K27ac_Enh;E092,H3K27ac_Enh;E101,H3K27ac_Enh;E102,H3K27ac_Enh;E075,H3K4me1_Enh;E094,H3K4me1_Enh;E098,H3K4me1_Enh;E101,H3K4me1_Enh;E102,H3K4me1_Enh;E110,H3K4me1_Enh;E101,H3K4me3_Pro		.	Foxj1_2;Maf_known3;TCF12_disc2	ENSG00000169330.4	3	103146	KIAA1024	39774	gene
6	33106840	rs9469357	C	T	0.06	0.07	0.07	0.04	0	0	E102,7_Enh;E116,7_Enh;E124,7_Enh	E029,17_EnhW2;E030,17_EnhW2;E031,17_EnhW2;E113,17_EnhW2;E124,18_EnhAc	E007,H3K9ac_Pro;E027,H3K9ac_Pro;E032,H3K4me1_Enh;E036,H3K4me1_Enh;E079,H3K4me1_Enh;E096,H3K4me1_Enh;E102,H3K4me1_Enh;E116,H3K4me1_Enh;E124,H3K4me1_Enh;E079,H3K27ac_Enh;E096,H3K27ac_Enh;E101,H3K27ac_Enh;E102,H3K27ac_Enh;E113,H3K4me3_Pro		.	Ets_known1;GATA_disc3;Pax-4_3;RXRA_disc2;Zec;Zic_2;p300_disc10	ENSG00000223865.5	3	19638	HLA-DPB1	11275	gene
10	84789196	rs9421478	G	A	0.74	0.64	0.74	0.68	0	0	E106,7_Enh		E007,H3K27ac_Enh;E022,H3K27ac_Enh;E106,H3K27ac_Enh;E007,H3K4me1_Enh;E075,H3K4me1_Enh;E102,H3K4me1_Enh;E106,H3K4me1_Enh;E113,H3K4me3_Pro	E123	.	Pitx2	ENSG00000238469.1	5	74068	AC091487.1	0	sequencing in progress
6	28746984	rs7763390	A	C	0.12	0.13	0.19	0.13	0	0	E114,1_TssA;E118,12_EnhBiv;E123,1_TssA	E014,23_PromBiv;E016,23_PromBiv;E114,22_PromP;E123,22_PromP	E001,H3K4me3_Pro;E002,H3K4me3_Pro;E003,H3K4me3_Pro;E012,H3K4me3_Pro;E013,H3K4me3_Pro;E014,H3K4me3_Pro;E015,H3K4me3_Pro;E016,H3K4me3_Pro;E018,H3K4me3_Pro;E019,H3K4me3_Pro;E020,H3K4me3_Pro;E028,H3K4me3_Pro;E048,H3K4me3_Pro;E100,H3K4me3_Pro;E114,H3K4me3_Pro;E119,H3K4me3_Pro;E121,H3K4me3_Pro;E123,H3K4me3_Pro;E127,H3K4me3_Pro;E003,H3K9ac_Pro;E014,H3K9ac_Pro;E114,H3K9ac_Pro;E123,H3K9ac_Pro;E013,H3K4me1…		.	HNF1_6;HNF1_7;Hoxa10;Hoxa9;Hoxb9;Hoxc10	ENSG00000221191.1	5	28931	AL662890.1	0	sequencing in progress
7	158429752	rs1530930	T	G	1	0.97	0.97	0.95	1	0	E115,7_Enh		E011,H3K4me3_Pro;E031,H3K4me1_Enh;E032,H3K4me1_Enh;E078,H3K4me1_Enh;E081,H3K4me1_Enh;E082,H3K4me1_Enh;E102,H3K4me1_Enh;E114,H3K4me1_Enh;E115,H3K4me1_Enh;E076,H3K27ac_Enh;E094,H3K27ac_Enh;E103,H3K27ac_Enh;E106,H3K27ac_Enh;E114,H3K27ac_Enh;E076,H3K9ac_Pro;E114,H3K9ac_Pro	E080;E081	.	.	ENSG00000155093.13	0	0	PTPRN2	1048732	gene
18	54356732	rs1787824	C	T	0.98	0.67	0.72	0.68	0	0	E115,7_Enh;E127,7_Enh	E115,22_PromP	E003,H3K27ac_Enh;E012,H3K27ac_Enh;E013,H3K27ac_Enh;E034,H3K27ac_Enh;E037,H3K27ac_Enh;E038,H3K27ac_Enh;E039,H3K27ac_Enh;E041,H3K27ac_Enh;E044,H3K27ac_Enh;E048,H3K27ac_Enh;E055,H3K27ac_Enh;E058,H3K27ac_Enh;E069,H3K27ac_Enh;E076,H3K27ac_Enh;E078,H3K27ac_Enh;E114,H3K27ac_Enh;E115,H3K27ac_Enh;E119,H3K27ac_Enh;E010,H3K4me1_Enh;E014,H3K4me1_Enh;E016,H3K4me1_Enh;E020,H3K4me1_Enh;E028,H3K4me1_Enh;E037,H3K…		.	AP-1_disc1;ATF3_known1;ATF3_known6;ATF3_known7;Barhl1;Barx2;Dbx1;E4BP4;E4F1;HNF1_1;HNF1_3;HNF1_6;HNF1_7;Hmx_2;Hoxb4;Hoxb6;Hoxb8;Hoxc9;Hoxd8;Jundm2;Ncx_2;Pou4f3;Sox_14;Sox_15;Sox_18;Sox_19;Sox_7;Sox_9;TATA_disc2	ENSG00000174448.3	0	0	STARD6	33606	gene
11	65458716	rs1626021	A	G	0.57	0.52	0.41	0.31	0	0	E116,2_TssAFlnk;E118,7_Enh;E123,7_Enh	E116,22_PromP	E001,H3K4me1_Enh;E013,H3K4me1_Enh;E014,H3K4me1_Enh;E015,H3K4me1_Enh;E016,H3K4me1_Enh;E018,H3K4me1_Enh;E021,H3K4me1_Enh;E023,H3K4me1_Enh;E024,H3K4me1_Enh;E025,H3K4me1_Enh;E032,H3K4me1_Enh;E048,H3K4me1_Enh;E055,H3K4me1_Enh;E056,H3K4me1_Enh;E063,H3K4me1_Enh;E066,H3K4me1_Enh;E068,H3K4me1_Enh;E069,H3K4me1_Enh;E074,H3K4me1_Enh;E087,H3K4me1_Enh;E105,H3K4me1_Enh;E113,H3K4me1_Enh;E116,H3K4me1_Enh;E118,H3K…	E006;E114;E117;E119;E123;E124	.	CTCFL_disc1;ERalpha-a_disc1;ERalpha-a_known4;Esr2	ENSG00000173727.7	0	0	AP000769.1	0	sequencing in progress
10	83693025	rs2065594	C	T	0.13	0.6	0.46	0.59	0	0	E117,7_Enh	E114,17_EnhW2;E117,18_EnhAc	E005,H3K4me1_Enh;E011,H3K4me1_Enh;E015,H3K4me1_Enh;E117,H3K4me1_Enh;E021,H3K27ac_Enh;E073,H3K27ac_Enh;E117,H3K27ac_Enh;E117,H3K4me3_Pro	E117	.	.	ENSG00000233945.1	5	17585	RP11-344L13.2	3033	no protein, long intergenic non-preotein coding RNA
16	24302075	rs13337712	G	A	0.17	0.14	0.01	0.32	0	0	E117,7_Enh		E006,H3K4me3_Pro;E113,H3K4me3_Pro;E091,H3K4me1_Enh;E117,H3K4me1_Enh		.	.	ENSG00000006116.3	0	0	CACNG3	107248	gene
6	57496746	rs12198315	C	A					0	0	E118,7_Enh		E002,H3K4me1_Enh;E015,H3K4me1_Enh;E106,H3K4me1_Enh;E118,H3K4me1_Enh		.	NRSF_known2	ENSG00000266579.1	0	0	RP1-71H19.2	3836	no protein, long intergenic non-preotein coding RNA
6	33157965	rs9296088	A	G	0.1	0.06	0.35	0.06	0	0	E118,7_Enh		E038,H3K9ac_Pro;E062,H3K9ac_Pro;E063,H3K9ac_Pro;E108,H3K9ac_Pro;E066,H3K4me1_Enh;E080,H3K4me1_Enh;E108,H3K4me1_Enh;E118,H3K4me1_Enh;E121,H3K4me1_Enh;E095,H3K27ac_Enh		.	ELF1_known1;NF-AT;Pax-4_5;STAT_known1;STAT_known12;STAT_known13;STAT_known7;TEF;Znf143_known1	ENSG00000204248.6	3	4715	COL11A2	29818	gene
		rs12197484	C	G					0	0	E118,7_Enh	E006,18_EnhAc	E004,H3K27ac_Enh;E012,H3K27ac_Enh;E014,H3K27ac_Enh;E015,H3K27ac_Enh;E016,H3K27ac_Enh;E017,H3K27ac_Enh;E020,H3K27ac_Enh;E055,H3K27ac_Enh;E056,H3K27ac_Enh;E118,H3K27ac_Enh;E126,H3K27ac_Enh;E004,H3K4me1_Enh;E011,H3K4me1_Enh;E017,H3K4me1_Enh;E019,H3K4me1_Enh;E023,H3K4me1_Enh;E025,H3K4me1_Enh;E076,H3K4me1_Enh;E084,H3K4me1_Enh;E085,H3K4me1_Enh;E087,H3K4me1_Enh;E110,H3K4me1_Enh;E114,H3K4me1_Enh;E118,H3K…		.	.	ENSG00000146143.12	0	0	PRIM2	332044	gene
6	57501280	rs12210940	A	T	0.01	0.14	0.06	0.16	0	0	E118,7_Enh	E006,18_EnhAc	E004,H3K27ac_Enh;E012,H3K27ac_Enh;E014,H3K27ac_Enh;E016,H3K27ac_Enh;E017,H3K27ac_Enh;E020,H3K27ac_Enh;E055,H3K27ac_Enh;E056,H3K27ac_Enh;E118,H3K27ac_Enh;E126,H3K27ac_Enh;E004,H3K4me1_Enh;E011,H3K4me1_Enh;E017,H3K4me1_Enh;E019,H3K4me1_Enh;E023,H3K4me1_Enh;E025,H3K4me1_Enh;E076,H3K4me1_Enh;E084,H3K4me1_Enh;E085,H3K4me1_Enh;E087,H3K4me1_Enh;E110,H3K4me1_Enh;E114,H3K4me1_Enh;E118,H3K4me1_Enh;E126,H3K…		.	Cart1;Hltf;Nkx6-2;Pou2f2_known2;Pou2f2_known3;Sox_5	ENSG00000146143.12	0	0	PRIM2	332044	gene
6	12775698	rs6941624	T	C	0.53	0.31	0.02	0.34	1	0	E121,7_Enh	E053,19_DNase;E054,19_DNase;E070,19_DNase;E082,19_DNase;E121,19_DNase	E020,H3K4me1_Enh;E055,H3K4me1_Enh;E081,H3K4me1_Enh;E082,H3K4me1_Enh;E109,H3K4me1_Enh;E120,H3K4me1_Enh;E121,H3K4me1_Enh;E121,H3K27ac_Enh;E121,H3K4me3_Pro	E081;E082;E120	.	Spz1_2	ENSG00000112137.11	0	0	PHACTR1	573679	gene
6	60952742	rs4616982	T	G	0.99	0.84	0.92	0.81	0	0	E127,7_Enh	E027,18_EnhAc;E028,18_EnhAc;E057,18_EnhAc;E058,18_EnhAc;E061,19_DNase;E099,19_DNase;E117,18_EnhAc;E119,18_EnhAc;E127,18_EnhAc	E001,H3K4me1_Enh;E002,H3K4me1_Enh;E012,H3K4me1_Enh;E016,H3K4me1_Enh;E018,H3K4me1_Enh;E058,H3K4me1_Enh;E127,H3K4me1_Enh;E003,H3K27ac_Enh;E012,H3K27ac_Enh;E020,H3K27ac_Enh;E058,H3K27ac_Enh;E119,H3K27ac_Enh;E127,H3K27ac_Enh;E127,H3K9ac_Pro	E057;E119;E127	MCF10A-Er-Src,STAT3,Harvard(Weissman),EtOH_0.01pct_4hr;MCF10A-Er-Src,STAT3,Harvard(Weissman),TAM_1uM_36hr;MCF10A-Er-Src,STAT3,Stanford,EtOH_0.01pct_12hr	SMC3_disc2	ENSG00000231273.1	3	228843	RP11-343D24.2	750	no protein, long intergenic non-preotein coding RNA
