# Supplementary material for: The complex genetics of gait speed: genome-wide meta-analysis approach
Source: Aging (Albany NY). 2017 Jan 10;9(1):209–46. doi: 10.18632/aging.101151 (PMC5310665; doi:10.18632/aging.101151)
Supplement: Supplementary file 12 [file aging-09-0209-s012.xlsx]

## Sheet: Sheet1
Supplementary table 11. Cohort's GWAS report
variable name	Description
SNPID	SNP ID as rs number
Chr	Chromosome number. Use symbols X, XY, Y and mt for non-autosomal markers.
Position	physical position for the reference sequence (build 36 strongly preferred)
coded_all	coded allele, also called modeled allele (in example of A/G SNP in which AA=0, AG=1 and GG=2, the coded allele is G)
noncoded_all	the alternate allele
strand_genome	+ or -, representing either the positive/forward strand or the negative/reverse strand of the human genome reference sequence; to clarify which strand the coded_all and noncoded_all are on
Beta	beta estimate from genotype-phenotype association, at least 5 decimal places -- “NA” if not available
SE	standard error of beta estimate, to at least 5 decimal places -- “NA” if not available
pval	p-value of test statistic, here just as a double check -- “NA” if not available
AF_coded_all	allele frequency for the coded allele -- “NA” if not available
HWE_pval	exact test Hardy-Weinberg equilibrium p-value -- only directly typed SNPs, NA for imputed
Callrate	genotyping callrate after exclusions
n_total	total sample with phenotype and genotype for SNP
imputed	1/0 coding; 1=imputed SNP, 0=if directly typed
used_for_imp	1/0 coding; 1=used for imputation, 0=not used for imputation
oevar_imp	observed divided by expected variance for imputed allele dosage -- NA otherwise
